# Supplementary material for: Chiral, sequence-definable foldamer-derived macrocycles
Source: PubMed Central journal article supplement (PMC8654020; doi:10.1039/d1sc05021d), 2021-11-10
Supplement: SC-012-D1SC05021D-s001.pdf [file SC-012-D1SC05021D-s001.pdf]

## Supplementary Information

# Chiral, Sequence-Definable Foldamer-Derived Macrocycles

Toyah M. C. Warnock,<sup>1</sup> Sundaram Rajkumar,<sup>2</sup> Matthew P. Fitzpatrick,<sup>1</sup> Christopher J. Serpell,<sup>3</sup>  
Paul Dingwall<sup>1</sup> and Peter C. Knipe<sup>1\*</sup>

1. *School of Chemistry and Chemical Engineering, Queen's University Belfast, David Keir Building, Belfast, BT9 5AG, UK*

2. *Almac Group Ltd., 20 Seagoe Industrial Estate, Craigavon, BT63 5QD, UK*

3. *School of Physical Sciences, Ingram Building, University of Kent, Canterbury, Kent, CT2 7NH, UK*

## Contents

|       |                                                        |    |
|-------|--------------------------------------------------------|----|
| 1     | General Experimental.....                              | 3  |
| 1.1   | Naming and Numbering of Compounds .....                | 3  |
| 1.2   | Solvents and Reagents.....                             | 3  |
| 1.3   | Chromatography .....                                   | 3  |
| 1.4   | Spectroscopy .....                                     | 3  |
| 1.5   | Crystallography.....                                   | 4  |
| 2     | Experimental Procedures and Characterization Data..... | 5  |
| 2.1   | General Experimental Procedures.....                   | 5  |
| 2.2   | Overall Synthetic Scheme towards Dimers 1a-1e .....    | 6  |
| 2.3   | Synthesis of Monomers .....                            | 7  |
| 2.3.1 | Isoleucine Series.....                                 | 7  |
| 2.3.2 | Valine Series.....                                     | 9  |
| 2.3.3 | Leucine Series .....                                   | 12 |
| 2.3.4 | Alanine Series.....                                    | 14 |
| 2.4   | Synthesis of Acyclic Dimers and Trimers .....          | 16 |
| 2.5   | Synthesis of Macrocycles .....                         | 30 |
| 3     | Ammonium Salt NMR Titration .....                      | 37 |
| 3.1   | Host and Guest Solution Preparation .....              | 37 |
| 3.2   | NMR Titrations.....                                    | 37 |
| 3.3   | Fitting .....                                          | 38 |
| 4     | X-Ray Crystallography.....                             | 42 |

|       |                                                     |     |
|-------|-----------------------------------------------------|-----|
| 4.1   | <i>t</i> -Bu Protected Dimer 1a (CCDC #2057484)     | 42  |
| 4.1.1 | Crystal Data                                        | 42  |
| 4.1.2 | Data Collection                                     | 43  |
| 4.1.3 | Refinement                                          | 43  |
| 4.2   | Dimer 2a (CCDC #2057483)                            | 43  |
| 4.2.1 | Crystal Data                                        | 44  |
| 4.2.2 | Data Collection                                     | 44  |
| 4.2.3 | Refinement                                          | 45  |
| 4.3   | Dimer 2d (CCDC #2057482)                            | 45  |
| 4.3.1 | Crystal Data                                        | 45  |
| 4.3.2 | Data Collection                                     | 46  |
| 4.3.3 | Refinement                                          | 46  |
| 4.4   | Macrocyclic Tetramer 3a (CCDC #2057486)             | 47  |
| 4.4.1 | Crystal Data                                        | 47  |
| 4.4.2 | Data Collection                                     | 48  |
| 4.4.3 | Refinement                                          | 48  |
| 5     | Density Functional Theory Calculations              | 49  |
| 5.1   | Trimer Summary (See Figure 3B)                      | 49  |
| 5.2   | Tetramer Summary (See Figure 3a)                    | 50  |
| 6     | Supplementary References                            | 51  |
| 7     | NMR Spectra                                         | 52  |
| 8     | Appendix – Coordinates for DFT-Optimized Geometries | 162 |
| 8.1   | Trimer Coordinates (Figure 3B)                      | 162 |
| 8.2   | Tetramer Coordinates (Figure 3A)                    | 166 |

# 1 General Experimental

## 1.1 Naming and Numbering of Compounds

Systematic compound names are those generated by ChemBioDraw™ Ultra version 15.1.0.144 (Perkin Elmer) following IUPAC nomenclature.

## 1.2 Solvents and Reagents

Reactions were carried out under a nitrogen atmosphere in oven-dried glassware unless otherwise stated. Standard inert atmosphere techniques were used in handling all air- and moisture-sensitive reagents. Where necessary toluene and DMF (from commercial sources) were degassed prior to use by sparging with argon or nitrogen (15 min). Other solvents and reagents were used directly as received from commercial suppliers.

## 1.3 Chromatography

Flash column chromatography was carried out using Fluorochem 60 40-63 micron silica gel. Thin-layer chromatography was carried out using Merck Kieselgel 60 F254 (230-400 mesh) fluorescent treated silica, visualized under UV light (254 nm) or by staining with aqueous potassium permanganate solution, ninhydrin or ceric ammonium molybdate solutions.

## 1.4 Spectroscopy

<sup>1</sup>H and <sup>13</sup>C NMR spectra were recorded using a Bruker 600, 400 or 300 MHz spectrometer running TopSpin™ software and are quoted in ppm for measurement against tetramethylsilane. Where no tetramethylsilane was present, spectra are referenced relative to the residual non-deuterated solvent peaks. Unless otherwise stated spectra were acquired at 298 K. Topspin™ was used for processing and viewing NMR data. Chemical shifts ( $\delta$ ) are given in parts per million (ppm), and coupling constants ( $J$ ) are given in Hertz (Hz). The <sup>1</sup>H NMR spectra are reported as follows:  $\delta$  / ppm (number of protons, multiplicity, coupling constant  $J$  / Hz (where appropriate), assignment (where known)). Multiplicity is abbreviated as follows: s = singlet, br = broad, d = doublet, t = triplet, q = quartet, m = multiplet, app = apparent. The numbering scheme used for NMR assignment is arbitrary and does not follow any particular convention. The <sup>13</sup>C NMR spectra are reported in  $\delta$  / ppm. Where necessary or appropriate, two-dimensional (COSY, HSQC, HMBC, NOESY or ROESY) NMR experiments were used to assist the assignment of signals in the <sup>1</sup>H and <sup>13</sup>C NMR spectra. In some cases, complete assignment of spectra was not possible (in particular, aromatic CHs corresponding to multiple phenyl groups overlapped significantly); in these cases only a partial assignment is reported.

Infra-red (IR) spectra were recorded on a Perkin-Elmer Spectrum 100 FT-IR spectrometer equipped with a Perkin-Elmer Universal ATR Sampling Accessory. Samples were deposited on the ATR accessory as a thin film. Only selected maximum absorbances ( $\nu_{\max}$ ) of the most intense peaks are reported ( $\text{cm}^{-1}$ ).

High resolution mass spectra (HRMS) were recorded by Analytical Services and Environmental Projects (ASEP) at Queen's University Belfast on a Waters LCT Premier ToF mass spectrometer using the electrospray ionisation (ESI) technique.

Optical rotations were recorded at the sodium D-line (589 nm) using a Perkin Elmer 341 polarimeter at a temperature of 20 °C and are reported in degrees using concentrations ( $c$ ) in  $\text{g}\cdot 100\text{ mL}^{-1}$ . Reported values are the average of eight readings.

## 1.5 Crystallography

Low temperature<sup>[1]</sup> single crystal X-ray diffraction studies for **1a**, **1d** and **2a** were carried out using CuK $\alpha$  radiation on an Agilent Supernova diffractometer equipped with an area detector and graphite monochromator. X-ray diffraction studies for **3a** were conducted using CuK $\alpha$  on a Rigaku 007HF equipped with Varimax confocal mirrors and an AFC11 goniometer and HyPix 6000 detector, at the National Crystallography Service in the University of Southampton. Raw frame data were reduced using CrysAlisPRO<sup>[2]</sup> solved using Superflip.<sup>[3]</sup> Full-matrix least-squares refinement of the structures were carried out using CRYSTALS.<sup>[4,5]</sup> Full refinement details are given in the supplementary material (CIF). CCDC 2057484 (**1a**), 2057483 (**2a**), 2057482 (**2d**), and 2057486 (**3a**) contain the supplementary crystallographic data for this paper. These data are provided free of charge by The Cambridge Crystallographic Data Centre and copies can be obtained free of charge *via* [www.ccdc.cam.ac.uk/data\\_request/cif](http://www.ccdc.cam.ac.uk/data_request/cif).

## 2 Experimental Procedures and Characterization Data

### 2.1 General Experimental Procedures

#### General Procedure A (*N*-Nosyl Deprotection)

To a stirred, room-temperature suspension of *N*-nosyl urea (1.0 eq.) and  $K_2CO_3$  (3.0 eq.) in anhydrous *N,N*-DMF (ca. 0.1 M) was added thiophenol (1.5 eq.). The rapid development of a deep orange colour was invariably observed upon the addition of thiophenol. After complete consumption of the *N*-nosyl-protected starting material by TLC analysis, the reaction mixture was diluted with ethyl acetate and washed with  $NaHCO_3$  (sat. aq., ca. 10 mL/mmol urea). The aqueous layer was extracted with ethyl acetate (ca. 2 x 10 mL/mmol urea). The combined organic extracts were washed well with water (ca. 4 x 10 mL/mmol urea) to remove any remaining *N,N*-DMF. The organic layer was dried over anhydrous magnesium sulfate, filtered, and concentrated *in vacuo*. The crude product was then purified by flash column chromatography.

#### General Procedure B (Palladium-Catalysed Coupling of Deprotected Ureas with Aryl Halides)

This reaction was carried out by analogy to a literature procedure.<sup>[6]</sup> To a sealed tube equipped with a magnetic stir bar was added deprotected urea (1.0 eq.), aryl halide (5.0-9.0 eq.), freshly recrystallized  $Pd_2(dba)_3$  (5-10 mol%), and Xantphos (15-30 mol%). Anhydrous toluene (ca. 0.1 M) was added to the flask, and the resulting suspension was degassed by sparging with nitrogen gas for 15-30 min.  $Cs_2CO_3$  or  $K_2CO_3$  (2.5 eq.) was then added in one portion to the flask, and the reaction mixture was heated to reflux under a nitrogen atmosphere. If after 16 h the reaction had not reached completion, a second portion of  $Pd_2(dba)_3$  (5.0 mol%) and Xantphos (15 mol%) were added. After complete consumption of the urea starting material by TLC analysis, the reaction was cooled to room temperature, diluted with dichloromethane (ca. 20 mL/mmol deprotected urea) and filtered over Celite®. The crude product was then purified by flash column chromatography.

## 2.2 Overall Synthetic Scheme towards Dimers 1a-1e

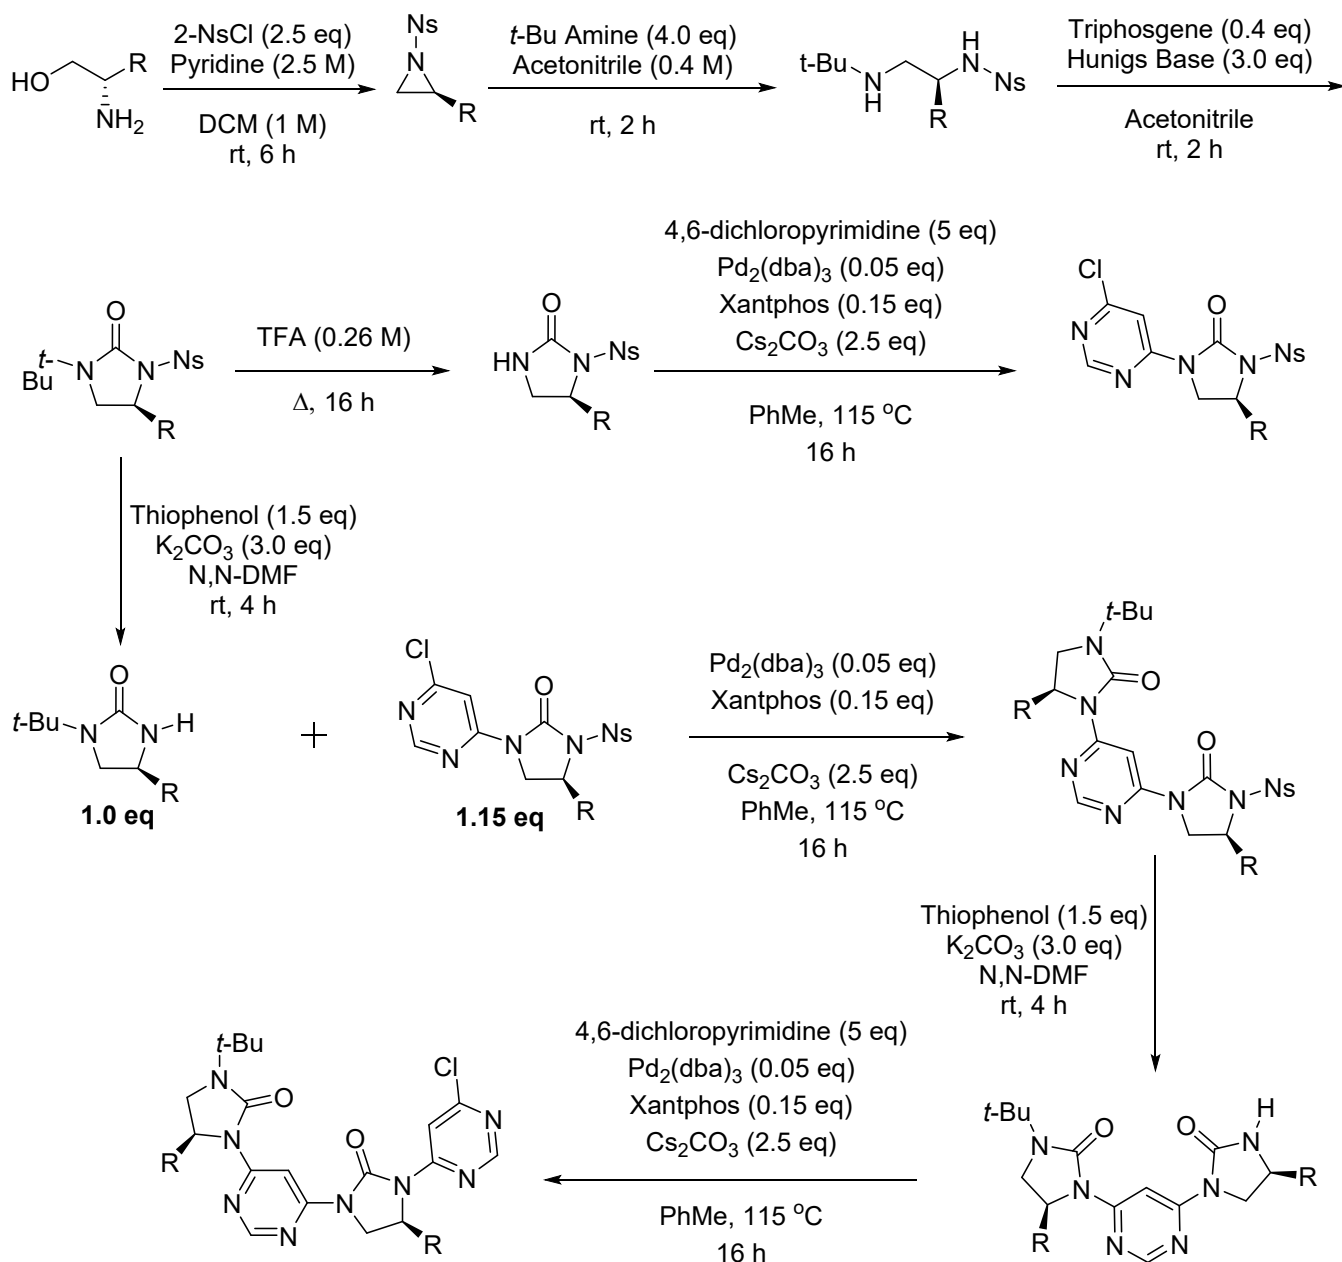

**Scheme S1.** General synthetic scheme towards dimers **1a-e**.

## 2.3 Synthesis of Monomers

### 2.3.1 Isoleucine Series

#### (S)-2-((S)-sec-butyl)-1-((2-nitrophenyl)sulfonyl)aziridine (**S1**)

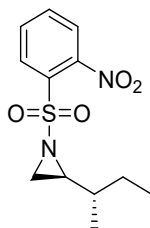

2-Nitrobenzenesulfonyl chloride (12.67 g, 57.18 mmol) was added in five portions to a stirred 0 °C solution of L-isoleucinol (3.00 g, 22.87 mmol) and pyridine (9.4 mL) in dichloromethane (23 mL). The reaction was stirred vigorously and then allowed to warm to room temperature. After 24 h, the volatiles were removed *in vacuo*. The concentrated reaction mixture was then taken up in diethyl ether (80 mL), and the organic layer was washed with HCl (1 M aq.) until the aqueous washings were acidic (approximately 6 x 40 mL). KOH (2 M aq., 160 mL) was added to the organic layer, and the resulting biphasic mixture was stirred vigorously for 6 h. The layers were separated, and the organic layer washed with KOH (2 M aq., 2 x 40 mL). The organic layer was dried over anhydrous magnesium sulfate, filtered, and concentrated *in vacuo*. Purification by flash column chromatography (silica gel, petrol:ethyl acetate, 5:1 → 2:1) afforded the aziridine **S1** (5.04 g, 78%) as a pale yellow oil. \*  $\delta_H$  (400 MHz, CDCl<sub>3</sub>): 8.20 (1H, app. dd, *J* 7.0, 1.6), 7.78-7.70 (3H, m), 2.89-2.81 (2H, m), 2.30 (1H, d, *J* 4.7), 1.55-1.47 (1H, m), 1.40-1.31 (1H, m), 1.29-1.21 (1H, m), 0.93-0.87 (6H, m);  $\delta_C$  (101 MHz, CDCl<sub>3</sub>): 148.8, 134.5, 132.1, 132.0, 131.3, 124.3, 46.4, 36.8, 35.2, 27.2, 15.4, 11.0; HRMS (ESI+): found 323.0466; C<sub>12</sub>H<sub>16</sub>N<sub>2</sub>O<sub>4</sub>SK, [M+K]<sup>+</sup> requires 323.0468;  $\nu_{max}$  (thin film): 3093.7, 2963.2, 2929.7, 2877.5, 1591.6, 1543.1, 1461.1, 1405.2, 1367.9, 1330.7, 1237.5, 1162.9, 1058.6, 995.2, 931.8, 868.5, 779.0, 752.9, 693.3 cm<sup>-1</sup>; [ $\alpha$ ]<sub>D</sub><sup>20</sup> +105.2 (*c* = 1.1, CHCl<sub>3</sub>).

#### N-((2S,3S)-1-(tert-butylamino)-3-methylpentan-2-yl)-2-nitrobenzenesulfonamide (**S2**)

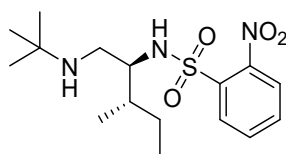

To a stirred, room temperature solution of *N*-nosyl-protected aziridine **S1** (5.04 g, 17.74 mmol) in acetonitrile (43 mL) was added *tert*-butylamine (7.5 mL, 70.96 mmol) in one portion. After 2 h the reaction was complete (TLC: petrol:ethyl acetate 1:1), and the volatiles were removed *in vacuo*. The crude residue was purified by flash column chromatography (silica gel, petrol:ethyl acetate 3:1 → 1:1 → pure ethyl acetate) to afford the product **S2** (5.97 g, 94%) as a yellow oil crystalline oil.  $\delta_H$  (400 MHz, CDCl<sub>3</sub>): 8.14-8.12 (1H, m), 7.86-7.84 (1H, m), 7.74-7.68 (2H, m), 3.29-3.25 (1H, m), 2.55 (1H, dd, *J* 12.0, 6.8), 2.47 (1H, dd, *J* 12.0, 4.1), 1.70-1.60 (1H, m), 1.58-1.48 (1H, m), 1.18-1.07 (1H, m), 0.89-0.85 (15H, m);  $\delta_C$  (101 MHz, CDCl<sub>3</sub>): 149.0, 135.4, 133.2, 132.8, 130.7, 125.3, 60.2, 50.0, 42.5, 37.6, 29.0, 25.7, 15.0, 11.8; HRMS (ESI+): found 358.1786; C<sub>16</sub>H<sub>28</sub>N<sub>3</sub>O<sub>4</sub>S, [M+H]<sup>+</sup> requires 358.1801;  $\nu_{max}$  (thin film): 3306.1, 3101.1, 2959.5, 2870.1, 1595.3, 1543.1, 1461.1, 1364.2, 1297.1, 1215.1, 1170.4, 1073.5, 1021.3, 985.4, 853.6, 779.0, 738.0, 704.5 cm<sup>-1</sup>; [ $\alpha$ ]<sub>D</sub><sup>20</sup> -107.8 (*c* = 1.0, CHCl<sub>3</sub>).

\* It has been previously reported that *N*-nosyl-protected aziridines are prone to polymerisation upon standing.<sup>[22]</sup> Aziridine **S1**, however, was indefinitely stable when stored as a dilute solution in DCM.

### (S)-4-((S)-sec-butyl)-1-(tert-butyl)-3-((2-nitrophenyl)sulfonyl)imidazolidin-2-one (S3)

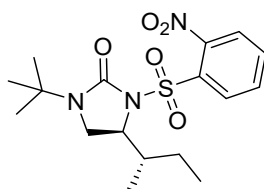

A solution of triphosgene (1.95 g, 6.56 mmol) in acetonitrile (50 mL) was added over 2 h *via* syringe pump to a stirred, room temperature solution of the diamine **S2** (5.97 g, 16.41 mmol) and Hünig's base (8.4 mL, 49.22 mmol) in acetonitrile (100 mL). After a further 30 min, the reaction mixture was concentrated *in vacuo*. The crude residue was taken up in dichloromethane (70 mL), and washed with HCl (30 mL, 1 M aq.). The layers were separated, and the aqueous phase was further extracted with dichloromethane (2 x 50 mL). The combined organic extracts were dried over anhydrous magnesium sulfate, filtered, and concentrated *in vacuo*. The crude residue was purified by trituration from hot hexane to afforded di-protected urea **S3** (5.55 g, 88%) as a brown crystalline solid.  $\delta_H$  (400 MHz,  $CDCl_3$ ): 8.43-8.41 (1H, m), 7.74-7.71 (3H, m), 4.28-4.26 (1H, m), 3.61 (1H, app. t,  $J$  9.2), 3.27 (1H, app. dd,  $J$  9.2, 1.7), 2.13-2.03 (1H, m), 1.48-1.38 (1H, m), 1.27 (9H, s), 1.23-1.16 (1H, m), 1.01 (3H, d,  $J$  6.5), 0.98 (3H, d,  $J$  7.3);  $\delta_C$  (101 MHz,  $CDCl_3$ ): 153.0, 147.9, 134.8, 134.2, 132.9, 132.0, 124.1, 57.8, 54.4, 42.1, 39.5, 27.4, 25.5, 12.2, 11.9; HRMS (ESI+): found 422.1159;  $C_{17}H_{25}N_3O_5SK$ ,  $[M+K]^+$  requires 422.1152;  $\nu_{max}$  (thin film): 3093.7, 2963.2, 2933.4, 2877.5, 1718.3, 1587.8, 1539.4, 1461.1, 1408.9, 1364.2, 1274.7, 1248.7, 1162.9, 1125.7, 1025.0, 998.9, 902.0, 756.6, 726.8  $cm^{-1}$ ;  $[\alpha]_D^{20}$  +361.0 ( $c$  = 1.0,  $CHCl_3$ ).

### (S)-4-((S)-sec-butyl)-1-(tert-butyl)imidazolidin-2-one (S4)

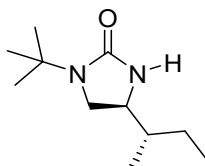

Prepared according to **General Procedure A** using di-protected urea **S3** (3.50 g, 9.13 mmol), thiophenol (1.29 mL, 13.69 mmol),  $K_2CO_3$  (3.79 g, 27.39 mmol) and  $N,N$ -DMF (46 mL). Reaction time = 2 h. Purification by flash column chromatography (silica gel, petrol:ethyl acetate 10:1  $\rightarrow$  5:1  $\rightarrow$  2:1 (product)) afforded **S4** (1.61 g, 89%) as an off-white crystalline solid. Product **S4** is not visible under UV light and must be stained with ceric ammonium molybdate.  $\delta_H$  (600 MHz,  $CDCl_3$ ): 4.44 (1H, br. s, N-H), 3.46 (1H, app. t,  $J$  8.6), 3.34-3.30 (1H, m), 3.08 (1H, app. t,  $J$  8.3), 1.47-1.42 (2H, m), 1.35 (9H, s), 1.15-1.07 (1H, m), 0.90 (3H, t,  $J$  7.1), 0.84 (3H, d,  $J$  6.4);  $\delta_C$  (151 MHz,  $CDCl_3$ ): 162.3, 54.1, 52.9, 47.4, 39.4, 27.7, 25.6, 14.2, 11.0; HRMS (ESI+): found 199.1087;  $C_{11}H_{23}N_2O$ ,  $[M+H]^+$  requires 199.1810;  $\nu_{max}$  (thin film): 3209.2, 3086.2, 2959.5, 2870.1, 1684.8, 1483.5, 1416.4, 1360.5, 1293.4, 1259.8, 1230.0, 1148.0, 991.5, 928.1, 834.9, 767.8, 685.8  $cm^{-1}$ ;  $[\alpha]_D^{20}$  +4.6 ( $c$  = 1.3,  $CHCl_3$ ).

### (S)-5-((S)-sec-butyl)-1-((2-nitrophenyl)sulfonyl)imidazolidin-2-one (S5)

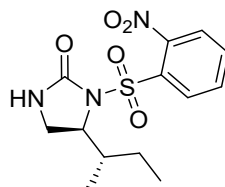

At room temperature, trifluoroacetic acid (30 mL) was added to di-protected urea **S3** (3.00 g, 7.82 mmol). The reaction mixture was stirred and then heated to reflux at 82°C for 16 h. When TLC analysis showed all starting material had been consumed, the reaction mixture was cooled to room temperature, and excess trifluoroacetic acid was removed by running a compressed air line over the solution for 1 h. The resulting crude brown residue was taken up in dichloromethane (60 mL) and washed with  $NaHCO_3$  (sat. aq. 30 mL) The layers were separated, and the aqueous layer was further extracted with dichloromethane (2 x 40 mL). The combined organic extracts were dried over anhydrous magnesium sulfate, filtered, and concentrated *in vacuo*. The crude solid was purified by trituration from hot hexane to



afforded the *tert*-butyl deprotected product **S5** (2.31 g, 90%) as an orange-brown crystalline solid.  $\delta_H$  (400 MHz,  $\text{CDCl}_3$ ): 8.43 (1H, d,  $J$  4.1), 7.75-7.73 (3H, m), 5.03 (1H, br. s, N-H), 4.57-4.55 (1H, m), 3.65 (1H, app. t,  $J$  9.3), 3.30 (1H, dd,  $J$  9.4, 2.2), 2.19-2.08 (1H, m), 1.47-1.38 (1H, m), 1.27-1.14 (1H, m), 1.06-0.97 (6H, m);  $\delta_C$  (151 MHz,  $\text{CDCl}_3$ ): 155.5, 148.0, 135.0, 134.6, 132.3, 131.9, 124.3, 61.8, 39.4, 39.2, 25.4, 12.2, 11.9; HRMS (ESI+): found 366.0506;  $\text{C}_{13}\text{H}_{17}\text{N}_3\text{O}_5\text{SK}$ ,  $[\text{M}+\text{K}]^+$  requires 366.0526;  $\nu_{\text{max}}$  (thin film): 3369.5, 3063.9, 2963.2, 2929.7, 1751.8, 1714.6, 1587.8, 1550.6, 1453.7, 1420.1, 1356.8, 1300.8, 1259.8, 1211.4, 1162.9, 1125.7, 1073.5, 849.8, 793.9, 730.6  $\text{cm}^{-1}$ ;  $[\alpha]_{\text{D}}^{20} +418.2$  ( $c = 0.2$ ,  $\text{CHCl}_3$ ).

### (S)-4-((S)-sec-butyl)-1-(6-chloropyrimidin-4-yl)-3-((2-nitrophenyl)sulfonyl)imidazolidin-2-one (S6)

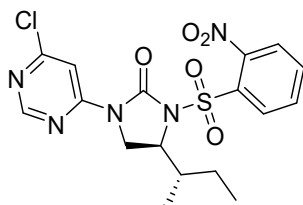

Prepared according to **General Procedure B** using deprotected urea **S5** (1.00 g, 3.05 mmol), 4,6-dichloropyrimidine (2.27 g, 15.25 mmol),  $\text{Pd}_2(\text{dba})_3$  (0.14 g, 0.15 mmol), Xantphos (0.26 g, 0.46 mmol), toluene (31 mL), and  $\text{K}_2\text{CO}_3$  (1.05 g, 7.63 mmol). Reaction time = 16 h. Purification by flash column chromatography (silica gel, petrol:ethyl acetate, 10:1  $\rightarrow$  8:1  $\rightarrow$  1:1) afforded the chloropyrimidine **S6** (1.25 g, 93%) as a pale yellow solid.  $\delta_H$  (600 MHz,  $\text{CDCl}_3$ ): 8.66 (1H, s), 8.49-8.48 (1H, m), 8.09 (1H, s), 7.83-7.78 (3H, m), 4.61-4.60 (1H, m), 4.12-4.05 (2H, m), 2.22-2.18 (1H, m), 1.54-1.48 (1H, m), 1.35-1.29 (1H, m), 1.03 (3H, t,  $J$  7.4), 0.99 (3H, d,  $J$  6.9);  $\delta_C$  (151 MHz,  $\text{CDCl}_3$ ): 161.6, 158.1, 157.6, 151.3, 148.2, 135.4, 135.3, 132.3, 131.5, 124.8, 109.3, 58.8, 42.9, 39.3, 25.4, 11.9, 11.9; HRMS (ESI+): found 478.0355;  $\text{C}_{17}\text{H}_{18}\text{N}_5\text{O}_5\text{ClSK}$ ,  $[\text{M}+\text{K}]^+$  requires 478.0354;  $\nu_{\text{max}}$  (thin film): 3108.6, 3145.9, 3049.0, 2963.2, 2873.8, 1736.9, 1565.5, 1535.7, 1487.2, 1457.4, 1397.8, 1356.8, 1289.7, 1230.0, 1166.7, 1107.0, 1069.7, 984.0, 902.0, 782.7, 734.3  $\text{cm}^{-1}$ ;  $[\alpha]_{\text{D}}^{20} +157.0$  ( $c = 1.2$ ,  $\text{CHCl}_3$ ).

## 2.3.2 Valine Series

### (S)-2-Isopropyl-1-((2-nitrophenyl)sulfonyl)aziridine (S7)

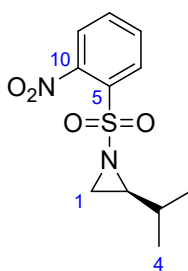

2-Nitrobenzenesulfonyl chloride (16.15 g, 72.9 mmol) was added in five portions to a stirred 0 °C solution of L-valinol (3.00 g, 29.1 mmol) and pyridine (12 mL) in dichloromethane (30 mL). The reaction was stirred vigorously and then allowed to warm to room temperature. After 24 h, the volatiles were removed *in vacuo*. The concentrated reaction mixture was then taken up in diethyl ether (80 mL), and the organic layer was washed with HCl (1 M aq.) until the aqueous washings were acidic (approximately 6 x 40 mL). KOH (2 M aq., 160 mL) was added to the organic layer, and the resulting biphasic mixture was stirred vigorously for 6 h. The layers were separated, and the organic layer washed with KOH (2 M aq., 2 x 40 mL). The organic layer was dried over anhydrous magnesium sulfate, filtered, and concentrated *in vacuo*. The crude residue was passed over a plug of silica (eluent: dichloromethane) and concentrated *in vacuo* to afford **S7** (4.93 g, 63%) as a pale yellow oil.  $\delta_H$  (400 MHz,  $\text{CDCl}_3$ ): 8.24-8.15 (1H, m, H9), 7.82-7.67 (3H, m,

\* It has been previously reported that *N*-nosyl-protected aziridines are prone to polymerisation upon standing.<sup>[22]</sup> Aziridine **S7**, however, was indefinitely stable when stored as a dilute solution in DCM.

H6, H7 & H8), 2.87-2.79 (2H, m, H1 & H2), 2.37-2.29 (1H, m, H1'), 1.66-1.51 (1H, m, H3), 0.96 (3H, d,  $J$  3.8, H4), 0.95 (3H, d,  $J$  3.7, H4');  $\delta_C$  (75 MHz, CDCl<sub>3</sub>): 148.6 (C10), 134.6 (C6/C7/C8), 132.0 (C6/C7/C8), 131.5 (C5), 131.1 (C9), 124.2 (C6/C7/C8), 47.1 (C2), 35.0 (C1), 30.0 (C3), 19.4 & 18.8 (C4 & C4'); HRMS (ESI+): found 271.0784; C<sub>11</sub>H<sub>15</sub>N<sub>2</sub>O<sub>4</sub>S, [M+H]<sup>+</sup> requires 271.0753;  $\nu_{max}$  (thin film): 1542, 1331, 1163, 751, 605, 596 cm<sup>-1</sup>; [ $\alpha$ ]<sub>D</sub><sup>20</sup> +85.6 ( $c$  = 1.17, CHCl<sub>3</sub>). These data are in agreement with previously reported values.<sup>[6]</sup>

#### (S)-N-(1-(tert-butylamino)-3-methylbutan-2-yl)-2-nitrobenzenesulfonamide (S8)

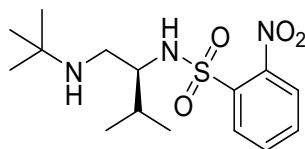

To a stirred, room temperature solution of *N*-nosyl-protected aziridine **S7** (8.01 g, 29.63 mmol) in acetonitrile (74 mL) was added *tert*-butylamine (12.24 mL, 118.52 mmol) in one portion. After 2 h the reaction was complete (TLC: petrol:ethyl acetate, 2:1), and the volatiles were removed *in vacuo*. The crude residue was purified by flash column chromatography (silica gel, petrol:ethyl acetate 2:1) to afford the product **S8** (9.20 g, 90%) as a colourless solid.  $\delta_H$  (600 MHz, CDCl<sub>3</sub>): 8.14-8.12 (1H, m), 7.85-7.84 (1H, m), 7.73-7.68 (2H, m), 3.24-3.21 (1H, m), 2.56 (1H, dd,  $J$  11.8, 6), 2.48 (1H, dd,  $J$  11.9, 4.0), 1.91-1.85 (1H, m), 0.93 (3H, d,  $J$  6.8), 0.90-0.85 (12H, m);  $\delta_C$  (151 MHz, CDCl<sub>3</sub>): 148.0, 135.6, 133.2, 132.9, 130.7, 61.4, 50.1, 43.3, 30.7, 29.0, 18.9, 18.7; HRMS (ESI+): found 344.1664; C<sub>15</sub>H<sub>26</sub>N<sub>3</sub>O<sub>4</sub>S, [M+H]<sup>+</sup> requires 344.1664;  $\nu_{max}$  (thin film): 2959.5, 2870.1, 1539.4, 1364.2, 1218.8, 779.0, 730.6, 685.8 cm<sup>-1</sup>; [ $\alpha$ ]<sub>D</sub><sup>20</sup> -116.5 ( $c$  = 1.0, CHCl<sub>3</sub>).

#### (S)-1-(tert-butyl)-4-isopropyl-3-((2-nitrophenyl)sulfonyl)imidazolidin-2-one (S9)

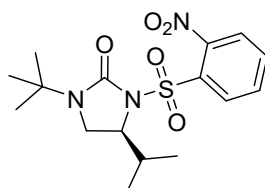

A solution of triphosgene (3.18 g, 10.72 mmol) in acetonitrile (80 mL) was added over 1 h *via* syringe pump to a stirred, room temperature solution of the diamine **S8** (9.20 g, 26.79 mmol) and Hünig's base (10.39 mL, 80.40 mmol) in acetonitrile (160 mL). After a further 30 min, the reaction mixture was concentrated *in vacuo*. The crude residue was taken up in dichloromethane (100 mL), and washed with HCl (40 mL, 1 M aq.). The layers were separated, and the aqueous phase was further extracted with dichloromethane (2 x 60 mL). The combined organic extracts were dried over anhydrous magnesium sulfate, filtered, and concentrated *in vacuo*. The crude residue was purified by flash column chromatography (silica gel, petrol:ethyl acetate 2:1) to afford di-protected urea **S9** (8.85 g, 89%) as a pale yellow oil that solidified upon standing.  $\delta_H$  (400 MHz, CDCl<sub>3</sub>): 8.43-8.41 (1H, m), 7.76-7.69 (3H, m), 4.18-4.14 (1H, m), 3.65 (1H, app. t,  $J$  9.1), 3.27 (1H, dd,  $J$  9.3, 1.6), 2.34-2.22 (1H, m), 1.27 (9H, s), 1.03 (3H, d,  $J$  6.8), 1.00 (3H, d,  $J$  6.8);  $\delta_C$  (101 MHz, CDCl<sub>3</sub>): 152.9, 147.7, 134.8, 134.1, 132.7, 131.9, 124.0, 58.7, 54.3, 42.4, 32.7, 27.3, 17.9, 15.5; HRMS (ESI+): found 370.1424; C<sub>16</sub>H<sub>24</sub>N<sub>3</sub>O<sub>5</sub>S, [M+H]<sup>+</sup> requires 370.1437;  $\nu_{max}$  (thin film): 2967.0, 1718.3, 1543.1, 1408.9, 1364.2, 1248.7, 1166.7, 1121.9, 1095.8, 1028.7, 853.6, 752.9, 704.5 cm<sup>-1</sup>; [ $\alpha$ ]<sub>D</sub><sup>20</sup> +321.5 ( $c$  = 1.43, CHCl<sub>3</sub>).

#### (S)-1-(tert-butyl)-4-isopropylimidazolidin-2-one (S10)

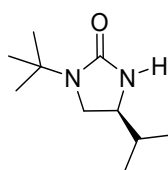

Prepared according to **General Procedure A** using di-protected urea **S9** (3.41 g, 9.23 mmol), thiophenol (1.3 mL, 13.85 mmol), K<sub>2</sub>CO<sub>3</sub> (3.83 g, 27.69 mmol) and *N,N*-DMF (92 mL). Reaction time = 4 h. Purification by flash

column chromatography (silica gel, petrol:ethyl acetate 10:1 → 5:1 → 1:1 (product)) afforded **S10** (1.52 g, 90%) as an off-white crystalline solid. Product **S10** is not visible under UV light and must be stained with ceric ammonium molybdate.  $\delta_H$  (400 MHz,  $CDCl_3$ ): 4.50 (1H, br s), 3.48 (1H, app. t,  $J$  8.7), 3.22 (1H, app q,  $J$  15.6, 7.5), 3.08 (1H, app. t,  $J$  8.2), 1.62 (1H, m), 1.34 (9H, s), 0.91 (3H, d,  $J$  6.8), 0.87 (3H, d,  $J$  6.8);  $\delta_C$  (101 MHz,  $CDCl_3$ ): 162.3, 55.5, 52.9, 47.6, 33.1, 27.7, 18.6, 18.1; HRMS (ESI+): found 185.1636;  $C_{10}H_{21}N_2O$ ,  $[M+H]^+$  requires 185.1654;  $\nu_{max}$  (thin film): 3227.9, 3086.2, 2959.5, 2877.5, 1681.0, 1479.8, 1412.7, 1360.5, 1237.5, 1148.0, 1092.1, 682.1  $cm^{-1}$ ;  $[\alpha]_D^{20} +180.9$  ( $c = 1.0$ ,  $CHCl_3$ ).

**(S)-5-isopropyl-1-((2-nitrophenyl)sulfonyl)imidazolidin-2-one (S11)**

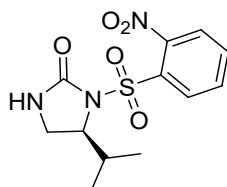

At room temperature, trifluoroacetic acid (52 mL) was added to di-protected urea **S9** (5.0 g, 13.53 mmol). The reaction mixture was stirred and then heated to reflux at 82°C for 16 h. When TLC analysis showed all starting material had been consumed, the reaction mixture was cooled to room temperature, and excess trifluoroacetic acid was removed by running a compressed air line over the solution for 1 h. The resulting crude brown residue was taken up in dichloromethane (60 mL) and washed with  $NaHCO_3$  (sat. aq. 30 mL). The layers were separated, and the aqueous layer was further extracted with dichloromethane (2 x 40 mL). The combined organic extracts were dried over anhydrous magnesium sulfate, filtered, and concentrated *in vacuo*. The crude solid was purified by trituration in hot hexane to afford the *tert*-butyl deprotected product **S11** (3.72 g, 88 %) as an off-white crystalline solid.  $\delta_H$  (400 MHz,  $CDCl_3$ ): 8.43-8.41 (1H, m), 7.75-7.70 (3H, m), 4.95 (1H, br. s), 4.44-4.42 (1H, m), 3.67 (1H, app. t,  $J$  9.2), 3.30 (1H, app. d,  $J$  9.1), 2.38-2.30 (1H, m), 1.06 (3H, d,  $J$  6.8), 1.00 (3H, d,  $J$  6.8);  $\delta_C$  (101 MHz,  $CDCl_3$ ): 155.1, 147.9, 135.0, 134.5, 132.2, 131.8, 124.1, 62.7, 39.5, 32.5, 17.9, 15.3; HRMS (ESI+): found 314.0810;  $C_{12}H_{16}N_3O_5S$ ,  $[M+H]^+$  requires 314.0811;  $\nu_{max}$  (thin film): 3365.8, 3063.9, 2955.8, 2926.0, 2870.1, 1751.8, 1707.1, 1535.7, 1490.9, 1356.8, 1252.4, 1125.7, 1073.5, 957.9, 853.6, 797.7, 723.1  $cm^{-1}$ ;  $[\alpha]_D^{20} +408.5$  ( $c = 1.0$ ,  $CHCl_3$ ). These data are in agreement with previously reported values.<sup>[6]</sup>

**(S)-1-(6-chloropyrimidin-4-yl)-4-isopropyl-3-((2-nitrophenyl)sulfonyl)imidazolidin-2-one (S12)**

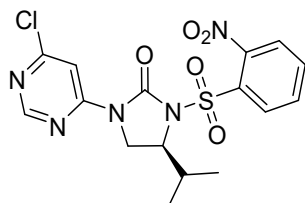

Prepared according to **General Procedure B** using deprotected urea **S11** (0.62 g, 1.99 mmol), 4,6-dichloropyrimidine (1.48 g, 9.93 mmol),  $Pd_2(dba)_3$  (0.09 g, 0.10 mmol), Xantphos (0.17 g, 0.30 mmol), toluene (10 mL), and  $Cs_2CO_3$  (1.62 g, 4.98 mmol). Reaction time = 16 h. Purification by flash column chromatography (silica gel, petrol:ethyl acetate, 7:1 → 5:1) afforded the chloropyrimidine **S12** (0.64 g, 75%) as a pale yellow solid.  $\delta_H$  (600 MHz,  $CDCl_3$ ): 8.67 (1H, s), 8.49-8.48 (1H, m), 8.08 (1H, s), 7.83-7.82 (2H, m), 7.79-7.77 (1H, m), 4.50-4.48 (1H, m), 4.13-4.07 (2H, m), 2.44-2.39 (1H, m), 1.07 (3H, d,  $J$  6.8), 1.02 (3H, d,  $J$  6.8);  $\delta_C$  (151 MHz,  $CDCl_3$ ): 161.4, 158.0, 157.5, 151.1, 148.0, 135.3, 135.2, 132.1, 131.3, 124.6, 109.2, 59.6, 43.0, 32.5, 17.8, 14.9; HRMS (ESI+): found 426.0644;  $C_{16}H_{17}ClN_5O_5S$ ,  $[M+H]^+$  requires 426.0639;  $\nu_{max}$  (thin film): 3142.1, 3101.1, 3026.6, 2933.4, 2967.0, 1736.9, 1535.7, 1453.7, 1394.0, 1360.5, 1226.3, 1170.4, 1110.7, 980.3  $cm^{-1}$ ;  $[\alpha]_D^{20} +186.1$  ( $c = 1.68$ ,  $CHCl_3$ ). These data are in agreement with previously reported values.<sup>[6]</sup>

### 2.3.3 Leucine Series

#### (S)-2-isobutyl-1-((2-nitrophenyl)sulfonyl)aziridine (**S13**)

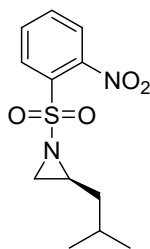

2-Nitrobenzenesulfonyl chloride (14.18 g, 64.00 mmol) was added in five portions to a stirred 0 °C solution of L-leucinol (3.00 g, 25.60 mmol) and pyridine (10.5 mL) in dichloromethane (30 mL). The reaction was stirred vigorously and then allowed to warm to room temperature. After 24 h, the volatiles were removed *in vacuo*. The concentrated reaction mixture was then taken up in diethyl ether (80 mL), and the organic layer was washed with HCl (1 M aq.) until the aqueous washings were acidic (approximately 6 x 40 mL). KOH (2 M aq., 160 mL) was added to the organic layer, and the resulting biphasic mixture was stirred vigorously for 6 h. The layers were separated, and the organic layer washed with KOH (2 M aq., 2 x 40 mL). The organic layer was dried over anhydrous magnesium sulfate, filtered, and concentrated *in vacuo*. Purification by flash column chromatography (silica gel, petrol:ethyl acetate, 10:1 → 5:1) afforded the aziridine **S13** (6.92 g, 95%) as a pale yellow oil. \*  $\delta_H$  (400 MHz, CDCl<sub>3</sub>): 8.21-8.19 (1H, m), 7.78-7.71 (1H, m), 3.08-3.02 (1H, m), 2.90 (1H, app. d, *J* 7.1), 2.26 (1H, app. d, *J* 4.9), 1.83-1.72 (1H, m), 1.59-1.53 (1H, m), 1.37-1.30 (1H, m), 0.96 (3H, d, *J* 2.0), 0.94 (3H, d, *J* 2.1);  $\delta_C$  (101 MHz, CDCl<sub>3</sub>): 148.7, 134.4, 132.3, 132.2, 131.2, 124.4, 41.0, 40.7, 36.7, 26.8, 22.8, 22.2; HRMS (ESI+): found 285.0901; C<sub>12</sub>H<sub>17</sub>N<sub>2</sub>O<sub>4</sub>S, [M+H]<sup>+</sup> requires 285.0909;  $\nu_{max}$  (thin film): 2959.5, 2870.1, 1543.1, 1468.6, 1367.9, 1330.7, 1230.0, 1162.9, 1058.6, 931.8, 849.8, 775.3, 749.2, 678.4 cm<sup>-1</sup>; [ $\alpha$ ]<sub>D</sub><sup>20</sup> +61.0 (*c* = 1.4, CHCl<sub>3</sub>).

#### (S)-N-(1-(*tert*-butylamino)-4-methylpentan-2-yl)-2-nitrobenzenesulfonamide (**S14**)

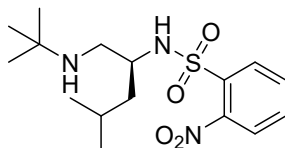

To a stirred, room temperature solution of *N*-nosyl-protected aziridine **S13** (1.0 g, 3.52 mmol) in acetonitrile (9 mL) was added *tert*-butylamine (1.5 mL, 14.08 mmol) in one portion. After 2 h the reaction was complete (TLC: dichloromethane), and the volatiles were removed *in vacuo*. The crude residue was purified by flash column chromatography (silica gel, dichloromethane:ethyl acetate 4:1) to afford the product **S14** (1.13 g, 90%) as a yellow oil that solidifies upon standing.  $\delta_H$  (400 MHz, CDCl<sub>3</sub>): 8.16-8.14 (1H, m), 7.86-7.83 (1H, m), 7.74-7.67 (2H, m), 3.56-3.50 (1H, m), 2.54-2.46 (2H, m), 1.70-1.58 (1H, m), 1.48-1.41 (1H, m), 1.30-1.23 (1H, m), 0.89 (9H, s), 0.87 (3H, d, *J* 6.6), 0.84 (3H, d, *J* 6.6);  $\delta_C$  (101 MHz, CDCl<sub>3</sub>): 148.0, 135.7, 133.2, 132.8, 130.7, 125.3, 54.0, 40.1, 46.2, 43.1, 29.0, 24.6, 23.0, 22.3; HRMS (ESI+): found 715.3514; C<sub>32</sub>H<sub>55</sub>N<sub>6</sub>O<sub>8</sub>S<sub>2</sub>, [2M+H]<sup>+</sup> requires 715.3523;  $\nu_{max}$  (thin film): 3317.3, 2952.1, 2866.3, 1595.3, 1535.7, 1412.7, 1353.0, 1233.7, 1170.4, 985.4, 853.6, 782.7, 734.3, 700.7 cm<sup>-1</sup>; [ $\alpha$ ]<sub>D</sub><sup>20</sup> -90.3 (*c* = 1.05, CHCl<sub>3</sub>).

\* It has been previously reported that *N*-nosyl-protected aziridines are prone to polymerisation upon standing.<sup>[22]</sup> Aziridine **S13**, however, was indefinitely stable when stored as a dilute solution in DCM.

**(S)-1-(*tert*-butyl)-4-isobutyl-3-((2-nitrophenyl)sulfonyl)imidazolidin-2-one (S15)**

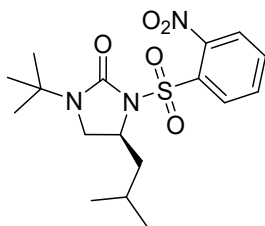

A solution of triphosgene (0.33 g, 1.12 mmol) in acetonitrile (8 mL) was added over 1 h *via* syringe pump to a stirred, room temperature solution of the diamine **S14** (1.00 g, 2.80 mmol) and Hünig's base (1.44 mL, 8.4 mmol) in acetonitrile (16 mL). After a further 30 min, the reaction mixture was concentrated *in vacuo*. The crude residue was taken up in dichloromethane (20 mL), and washed with HCl (10 mL, 1 M aq.). The layers were separated, and the aqueous phase was further extracted with dichloromethane (2 x 30 mL). The combined organic extracts were dried over anhydrous magnesium sulfate, filtered, and concentrated *in vacuo*. The crude residue was purified by flash column chromatography (silica gel, 1% triethylamine:dichloromethane) to afford di-protected urea **S15** (1.04 g, 97%) as a pale yellow oil.  $\delta_H$  (400 MHz, CDCl<sub>3</sub>): 8.42-8.39 (1H, m), 7.76-7.69 (3H, m), 4.32-4.27 (1H, m), 3.72 (1H, app. t, *J* 8.7), 3.17 (1H, app. t, *J* 8.9, 2.2), 1.90-1.83 (1H, m), 1.76-1.65 (2H, m), 1.27 (9H, s), 1.00 (6H, d, *J* 6.3);  $\delta_C$  (101 MHz, CDCl<sub>3</sub>): 152.8, 147.9, 134.6, 134.3, 132.8, 132.0, 124.2, 54.3, 53.2, 46.9, 44.9, 27.4, 24.9, 23.5, 22.0; HRMS (ESI<sup>+</sup>): found 384.1588; C<sub>17</sub>H<sub>26</sub>N<sub>3</sub>O<sub>5</sub>S, [M+H]<sup>+</sup> requires 384.1593;  $\nu_{max}$  (thin film): 2959.5, 2870.1, 1741.6, 1539.4, 1468.6, 1408.9, 1349.3, 1274.7, 1166.7, 1110.7, 969.1, 853.6, 782.7, 745.5 cm<sup>-1</sup>;  $[\alpha]_D^{20}$  -331.7 (*c* = 1.1, CHCl<sub>3</sub>).

**(S)-1-(*tert*-butyl)-4-isobutylimidazolidin-2-one (S16)**

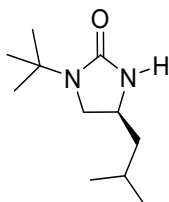

Prepared according to **General Procedure A** using di-protected urea **S15** (4.86 g, 12.66 mmol), thiophenol (1.79 mL, 18.99 mmol), K<sub>2</sub>CO<sub>3</sub> (5.25 g, 37.99 mmol) and *N,N*-DMF (120 mL). Reaction time = 4 h. Purification by flash column chromatography (silica gel, petrol:ethyl acetate 10:1 → 5:1 → 2:1 (product)) afforded **S16** (2.31 g, 92%) as an off-white crystalline solid. Product **S16** is not visible under UV light and must be stained with ceric ammonium molybdate.  $\delta_H$  (400 MHz, CDCl<sub>3</sub>): 4.37 (1H, br. s, N-H), 3.63-3.55 (1H, m), 3.52 (1H, app. t, *J* 8.1), 2.99 (1H, app. t, *J* 7.6), 1.66-1.55 (1H, m), 1.49 (1H, m), 1.34 (9H, s), 1.32-1.28 (1H, m), 0.91 (6H, app. t, *J* 6.7);  $\delta_C$  (101 MHz, CDCl<sub>3</sub>): 162.3, 52.9, 49.8, 47.8, 44.7, 27.7, 25.3, 23.1, 22.4; HRMS (ESI<sup>+</sup>): found 397.3532; C<sub>22</sub>H<sub>45</sub>N<sub>4</sub>O<sub>2</sub>, [2M+H]<sup>+</sup> requires 397.3543;  $\nu_{max}$  (thin film): 3213.0, 3086.2, 2952.1, 2907.3, 2870.1, 1681.0, 1442.6, 1364.2, 1259.8, 1226.3, 1095.8, 1032.5, 931.8, 834.9, 767.8, 693.3 cm<sup>-1</sup>;  $[\alpha]_D^{20}$  -7.2 (*c* = 1.2, CHCl<sub>3</sub>).

**(S)-5-isobutyl-1-((2-nitrophenyl)sulfonyl)imidazolidin-2-one (6)**

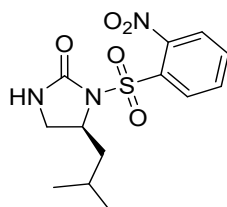

At room temperature, trifluoroacetic acid (10 mL) was added to di-protected urea **S15** (1.0 g, 2.61 mmol). The reaction mixture was stirred and then heated to reflux at 82°C for 16 h. When TLC analysis showed all starting material had been consumed, the reaction mixture was cooled to room temperature, and excess trifluoroacetic acid was removed by running a compressed air line over the solution for 1 h. The resulting crude brown residue was taken up in dichloromethane (60 mL) and washed with NaHCO<sub>3</sub> (sat. aq. 30 mL). The layers were separated, and the aqueous layer

was further extracted with dichloromethane (2 x 40 mL). The combined organic extracts were dried over anhydrous magnesium sulfate, filtered, and concentrated *in vacuo*. The crude solid was purified by trituration in hot hexane to afford the *tert*-butyl deprotected product **6** (0.85 g, 99%) as an off-white crystalline solid.  $\delta_H$  (400 MHz, CDCl<sub>3</sub>): 8.40-8.38 (1H, m), 7.75-7.69 (3H, m), 5.27 (1H, br. s, N-H), 4.56-4.50 (1H, m), 3.75 (1H, app. t, *J* 8.8), 3.20 (1H, app. dd, *J* 8.8, 1.5), 1.92-1.86 (1H, m), 1.81-1.77 (1H, m), 1.73-1.66 (1H, m), 1.00 (6H, d, *J* 6.6);  $\delta_C$  (101 MHz, CDCl<sub>3</sub>): 155.1, 148.0, 134.7, 134.6, 132.3, 131.9, 124.3, 57.2, 44.9, 44.1, 24.9, 23.5, 21.; HRMS (ESI+): found 328.0948; C<sub>13</sub>H<sub>17</sub>N<sub>3</sub>O<sub>5</sub>S, [M+H]<sup>+</sup> requires 328.0967;  $\nu_{max}$  (thin film): 3101.1, 2959.5, 2873.8, 1740.7, 1539.4, 1457.4, 1395.8, 1364.2, 1334.4, 1271.0, 1174.4, 1107.0, 984.0, 853.6, 741.7, 767.8, 700.7 cm<sup>-1</sup>;  $[\alpha]_D^{20}$  +477.5 (*c* = 1.2, CHCl<sub>3</sub>).

### (S)-1-(6-chloropyrimidin-4-yl)-4-isobutyl-3-((2-nitrophenyl)sulfonyl)imidazolidin-2-one (S17)

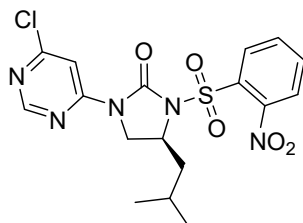

Prepared according to **General Procedure B** using deprotected urea **6** (0.73 g, 2.23 mmol), 4,6-dichloropyrimidine (1.66 g, 11.15 mmol), Pd<sub>2</sub>(dba)<sub>3</sub> (0.10 g, 0.11 mmol), Xantphos (0.19 g, 0.33 mmol), toluene (11 mL), and Cs<sub>2</sub>CO<sub>3</sub> (1.82 g, 5.58 mmol). Reaction time = 16 h. Purification by flash column chromatography (silica gel, petrol:ethyl acetate, 7:1 → 1:1) afforded the chloropyrimidine **S17** (0.84 g, 86%) as a pale yellow solid.  $\delta_H$  (400 MHz, CDCl<sub>3</sub>): 8.66 (1H, d, *J* 0.7), 8.50-8.46 (1H, m), 8.10 (1H, d, *J* 0.7), 7.84-7.77 (3H, m), 4.62-4.58 (1H, m), 4.22 (1H, app dd, *J* 10.9, 8.7), 4.01 (1H, app. dd, *J* 11.0, 1.9), 1.99-1.93 (1H, m), 1.83-1.74 (2H, m), 1.04 (6H, app. t, *J* 6.9);  $\delta_C$  (101 MHz, CDCl<sub>3</sub>): 161.6, 158.1, 157.9, 150.9, 148.1, 135.4, 135.0, 132.3, 131.5, 124.8, 109.5, 54.1, 47.5, 45.1, 24.9, 23.4, 21.7; HRMS (ESI+): found 440.0781; C<sub>17</sub>H<sub>19</sub>N<sub>5</sub>O<sub>5</sub>SCl, [M+H]<sup>+</sup> requires 440.0795;  $\nu_{max}$  (thin film): 3365.8, 3.71.3, 2959.5, 2922.2, 2870.1, 1751.8, 1714.6, 159.1, 1550.6, 1464.8, 1420.1, 1356.8, 1267.1, 1248.7, 1162.9, 1121.9, 1066.0, 849.8, 797.7, 726.8 cm<sup>-1</sup>;  $[\alpha]_D^{20}$  +166.1 (*c* = 1.1, CHCl<sub>3</sub>).

## 2.3.4 Alanine Series

### (S)-2-methyl-1-((2-nitrophenyl)sulfonyl)aziridine (S18)

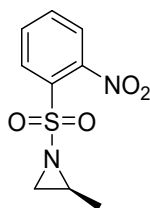

2-Nitrobenzenesulfonyl chloride (21.16 g, 100.0 mmol) was added in five portions to a stirred 0 °C solution of L-alaninol (3.00 g, 40.0 mmol) and pyridine (16 mL) in dichloromethane (40 mL). The reaction was stirred vigorously and then allowed to warm to room temperature. After 24 h, the volatiles were removed *in vacuo*. The concentrated reaction mixture was then taken up in diethyl ether (80 mL), and the organic layer was washed with HCl (1 M aq.) until the aqueous washings were acidic (approximately 6 x 40 mL). KOH (2 M aq., 160 mL) was added to the organic layer, and the resulting biphasic mixture was stirred vigorously for 6 h. The layers were separated, and the organic layer washed with KOH (2 M aq., 2 x 40 mL). The organic layer was dried over anhydrous magnesium sulfate, filtered, and concentrated *in vacuo*. Purification by flash column chromatography (silica gel, dichloromethane) afforded the aziridine **S18** (6.22 g, 64%) as a pale yellow oil.\*  $\delta_H$  (400 MHz, CDCl<sub>3</sub>): 8.31-8.14 (1H, m), 7.86-7.62 (3H, m), 3.19-3.03 (1H, m), 2.90 (1H, d, *J* 7.0), 2.27 (1H, d, *J* 4.9), 1.37 (3H, d, *J* 5.6);  $\delta_C$  (101 MHz, CDCl<sub>3</sub>): 148.5, 134.3, 132.4, 132.2, 131.1,

\* It has been previously reported that *N*-nosyl-protected aziridines are prone to polymerisation upon standing.<sup>[22]</sup> Aziridine **S18**, however, was indefinitely stable when stored as a dilute solution in DCM.

124.3, 38.6, 36.8, 16.9; HRMS (ESI+): found 243.0443; C<sub>9</sub>H<sub>11</sub>N<sub>2</sub>O<sub>4</sub>S, [M+H]<sup>+</sup> requires 242.0440;  $v_{max}$  (thin film): 3097.4, 2981.9, 1543.1, 1364.2, 1330.7, 1162.9, 1032.5, 849.8, 734.3 cm<sup>-1</sup>; [ $\alpha$ ]<sub>D</sub><sup>20</sup> -0.55 (c = 1.1, CHCl<sub>3</sub>). This compound has previously been reported but only LCMS data were made available.<sup>[7]</sup>

### (S)-N-(1-(*tert*-butylamino)propan-2-yl)-2-nitrobenzenesulfonamide (S19)

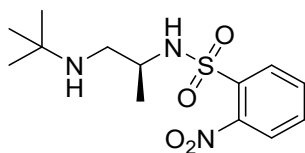

To a stirred, room temperature solution of *N*-nosyl-protected aziridine **S18** (4.15 g, 17.13 mmol) in acetonitrile (43 mL) was added *tert*-butylamine (7.2 mL, 68.52 mmol) in one portion. After 2 h the reaction was complete (TLC: 5% methanol/dichloromethane), and the volatiles were removed *in vacuo*. The crude residue was purified by recrystallisation from petrol and dichloromethane to afford the product **S19** (5.03 g, 93%) as a yellow solid.  $\delta_H$  (400 MHz, CDCl<sub>3</sub>): 8.21-8.07 (1H, m), 7.88-7.85 (1H, m), 7.73-7.71 (2H, m), 3.57-3.20 (1H, m), 2.60 (1H, dd, *J* 12.1, 4.0), 2.45 (1H, dd, *J* 11.9, 7.4), 1.18 (3H, d, *J* 6.5), 0.97 (9H, s);  $\delta_C$  (101 MHz, CDCl<sub>3</sub>): 148.0, 134.7, 133.6, 132.6, 130.9, 125.2, 51.2, 50.1, 47.5, 29.0, 19.7; HRMS (ESI+): found 316.1305; C<sub>13</sub>H<sub>22</sub>N<sub>3</sub>O<sub>4</sub>S, [M+H]<sup>+</sup> requires 316.1331;  $v_{max}$  (thin film): 3321.1, 2967.0, 1539.4, 1364.2, 1170.4, 1125.7, 782.7, 741.7 cm<sup>-1</sup>; [ $\alpha$ ]<sub>D</sub><sup>20</sup> -74.1 (c = 1.4, CHCl<sub>3</sub>).

### (S)-1-(*tert*-butyl)-4-methyl-3-((2-nitrophenyl)sulfonyl)imidazolidin-2-one (S20)

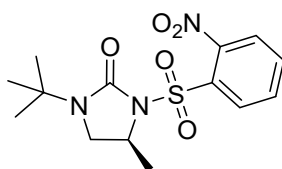

A solution of triphosgene (1.71 g, 14.43 mmol) in acetonitrile (30 mL) was added over 1 h *via* syringe pump to a stirred, room temperature solution of the diamine **S19** (4.55 g, 14.4 mmol) and Hünig's base (7.5 mL, 43.28 mmol) in acetonitrile (42 mL). After a further 30 min, the reaction mixture was concentrated *in vacuo*. The crude residue was taken up in dichloromethane (50 mL), and washed with HCl (20 mL, 1 M aq.). The layers were separated, and the aqueous phase was further extracted with dichloromethane (2 x 50 mL). The combined organic extracts were dried over anhydrous magnesium sulfate, filtered, and concentrated *in vacuo*. The crude residue was purified by flash column chromatography (silica gel, 1% triethylamine:dichloromethane) to afford di-protected urea **S20** (4.93 g, 96%) as a pale yellow solid.  $\delta_H$  (400 MHz, CDCl<sub>3</sub>): 8.44-8.36 (1H, m), 7.78-7.65 (3H, m), 4.47-4.30 (1H, m), 3.74 (1H, t, *J* 8.7), 3.08 (1H, dd, *J* 8.9, 2.7), 1.54 (3H, d, *J* 6.3), 1.30 (9H, s);  $\delta_C$  (101 MHz, CDCl<sub>3</sub>): 152.4, 147.8, 134.2, 134.1, 132.5, 131.9, 124.0, 54.2, 50.4, 48.5, 27.3, 22.2; HRMS (ESI+): found 342.1121; C<sub>14</sub>H<sub>20</sub>N<sub>3</sub>O<sub>5</sub>S, [M+H]<sup>+</sup> requires 342.1124;  $v_{max}$  (thin film): 2978.1, 2933.4, 1718.3, 1539.4, 1405.2, 1360.5, 1274.7, 1162.9, 1125.7, 779.0, 738.0 cm<sup>-1</sup>; [ $\alpha$ ]<sub>D</sub><sup>20</sup> +317.9 (c = 1.4, CHCl<sub>3</sub>).

### (S)-5-methyl-1-((2-nitrophenyl)sulfonyl)imidazolidin-2-one (7)

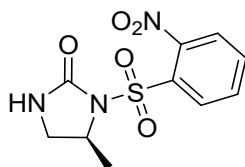

At room temperature, trifluoroacetic acid (29 mL) was added to di-protected urea **S20** (2.53 g, 7.41 mmol). The reaction mixture was stirred and then heated to reflux at 82°C for 16 h. When TLC analysis showed all starting material had been consumed, the reaction mixture was cooled to room temperature, and excess trifluoroacetic acid was removed by running a compressed air line over the solution for 1 h. The resulting crude brown residue was taken up in dichloromethane (60 mL) and washed with NaHCO<sub>3</sub> (sat. aq. 30 mL). The layers were separated, and the aqueous layer was further extracted with dichloromethane (2 x 40 mL). The combined organic extracts were dried over anhydrous magnesium sulfate, filtered, and concentrated *in vacuo*. The crude solid was purified by trituration in hot hexane to afford

the *tert*-butyl deprotected product **7** (2.11 g, >99.9%) as gray crystalline solid.  $\delta_H$  (400 MHz, CDCl<sub>3</sub>): 8.45-8.35 (1H, m), 7.79-7.65 (3H, m), 5.27 (1H, s), 4.67-4.56 (1H, m), 3.79 (1H, td, *J* 8.8), 3.10 (1H, ddd, *J* 8.8, 2.8, 0.9), 1.60 (3H, d, *J* 6.4);  $\delta_C$  (101 MHz, CDCl<sub>3</sub>): 154.7, 147.9, 134.6, 134.3, 132.1, 131.8, 124.1, 54.3, 45.8, 22.4; HRMS (ESI<sup>+</sup>): found 324.0047; C<sub>10</sub>H<sub>11</sub>N<sub>3</sub>O<sub>5</sub>SK, [M+K]<sup>+</sup> requires 324.0057;  $\nu_{max}$  (thin film): 3384.4, 1736.9, 1543.1, 1364.2, 1170.4, 1252.4, 1170.4, 1092.1, 853.6 cm<sup>-1</sup>;  $[\alpha]_D^{20}$  +484.5 (*c* = 0.4, CHCl<sub>3</sub>).

## 2.4 Synthesis of Acyclic Dimers and Trimers

### (S)-1-(*tert*-butyl)-3-(6-((S)-4-((S)-*sec*-butyl)-3-((2-nitrophenyl)sulfonyl)-2-oxoimidazolidin-1-yl)pyrimidin-4-yl)-4-isopropylimidazolidin-2-one (S21)

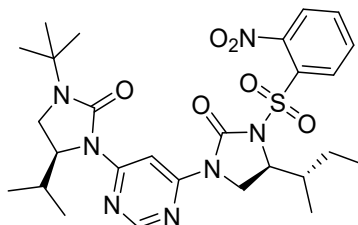

Prepared according to **General Procedure B** using chloropyrimidine **S6** (0.36 g, 0.81 mmol), imidazolidin-2-one **S10** (0.10 g, 0.54 mmol) [added in one portion at reaction time = 0], Pd<sub>2</sub>(dba)<sub>3</sub> (25 mg, 27 μmol), Xantphos (50 mg, 81 μmol), toluene (5 mL), and Cs<sub>2</sub>CO<sub>3</sub> (0.44 g, 1.35 mmol). Reaction time = 16 h. Purification by flash column chromatography (silica gel, firstly 10% ethyl acetate:dichloromethane to remove xantphos and xantphos oxide that co-elutes with the product in petrol:ethyl acetate. The column fractions containing the product were concentrated *in vacuo* and subjected to a second column, silica gel, petrol:ethyl acetate 10:1 → 3:1) afforded the di-protected dimer **S21** (0.16 g, 51%) as a pale yellow solid.  $\delta_H$  (400 MHz, CDCl<sub>3</sub>): 8.79 (1H, d, *J* 0.9), 8.56-8.56 (1H, dd, *J* 8.0, 1.1), 8.51 (1H, d, *J* 0.8), 7.79 (1H, app. td, *J* 7.1, 2.1), 7.75-7.71 (2H, m), 4.54 (1H, dt, *J* 8.6, 3.0), 4.47 (1H, dt, *J* 9.3, 3.1), 4.10-4.01 (2H, m), 3.40 (1H, app. t, *J* 9.4), 3.29 (1H, dd, *J* 9.3, 3.0), 2.50-2.42 (1H, m), 2.23-2.13 (1H, m), 1.55-1.44 (1H, m), 1.40 (9H, s), 1.35-1.28 (1H, m), 1.03-0.98 (6H, m), 0.92 (3H, d, *J* 7.1), 0.79 (3H, d, *J* 6.9);  $\delta_C$  (101 MHz, CDCl<sub>3</sub>): 158.8, 157.0, 156.8, 155.9, 150.9, 148.2, 135.6, 134.9, 132.4, 131.9, 124.4, 96.6, 58.4, 54.9, 54.0, 42.8, 40.4, 39.3, 28.4, 27.7, 25.4, 18.4, 14.5, 12.0, 11.9; HRMS (ESI<sup>+</sup>): found 626.2181; C<sub>27</sub>H<sub>37</sub>N<sub>7</sub>O<sub>6</sub>SK, [M+K]<sup>+</sup> requires 626.2163;  $\nu_{max}$  (thin film): 3093.7, 2963.2, 2922.2, 1736.9, 1572.9, 1539.4, 1435.0, 1390.3, 1360.5, 1274.7, 1215.1, 1162.9, 1110.7, 1069.7, 984.0, 916.9, 887.1, 808.8, 738.0, 678.4 cm<sup>-1</sup>;  $[\alpha]_D^{20}$  +109.0 (*c* = 1.1, CHCl<sub>3</sub>).

### (S)-1-(*tert*-butyl)-3-(6-((S)-4-((S)-*sec*-butyl)-2-oxoimidazolidin-1-yl)pyrimidin-4-yl)-4-isopropylimidazolidin-2-one (S22)

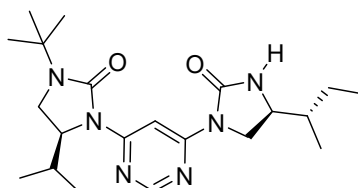

Prepared according to **General Procedure A** using di-protected dimer **S21** (0.48 g, 0.82 mmol), thiophenol (0.12 mL, 1.23 mmol), K<sub>2</sub>CO<sub>3</sub> (0.34 g, 2.46 mmol) and *N,N*-DMF (10 mL). Reaction time = 3 h. Purification by flash column chromatography (silica gel, petrol:ethyl acetate 10:1 → 5:1 → 1:1 (product)) afforded **S22** (0.31 g, 94%) as a pale yellow crystalline solid.  $\delta_H$  (600 MHz, CDCl<sub>3</sub>): 9.00 (1H, s), 8.50 (1H, s), 5.70 (1H, br. s, N-H), 4.50 (1H, dt, *J* 9.2, 2.8), 4.11 (1H, app. t, *J* 10.0), 3.76 (1H, dd, *J* 10.5, 7.1), 3.61 (1H, app. q, *J* 14.9, 7.1), 3.43 (1H, app. t, *J* 9.1), 3.29 (1H, dd, *J* 8.9, 2.3), 2.50-2.45 (1H, m), 1.55-1.51 (1H, m), 1.41 (10H, app. s), 0.95-0.92 (9H, m), 0.81 (3H, d, *J* 6.8);  $\delta_C$  (151 MHz, CDCl<sub>3</sub>): 158.4, 158.2, 157.7, 156.9, 156.0, 96.0, 54.8, 53.9, 53.4, 47.3, 40.5, 39.6, 28.6, 27.7, 25.2, 18.4, 14.6, 13.9, 11.2; HRMS (ESI<sup>+</sup>): found 403.2825; C<sub>21</sub>H<sub>35</sub>N<sub>6</sub>O<sub>2</sub>, [M+H]<sup>+</sup> requires 403.2821;  $\nu_{max}$  (thin film): 3186.9, 3123.5, 2963.2, 2929.7, 2877.5, 1714.6, 1580.4, 1461.1, 1397.8, 1367.9, 1267.3, 1244.9, 1162.9, 1114.5, 1073.5, 984.0, 928.1, 883.4, 823.7, 756.6, 693.3 cm<sup>-1</sup>;  $[\alpha]_D^{20}$  +45.5 (*c* = 0.8, CHCl<sub>3</sub>).



**(S)-1-(tert-butyl)-3-(6-((S)-4-((S)-sec-butyl)-3-(6-chloropyrimidin-4-yl)-2-oxoimidazolidin-1-yl)pyrimidin-4-yl)-4-isopropylimidazolidin-2-one (1a)**

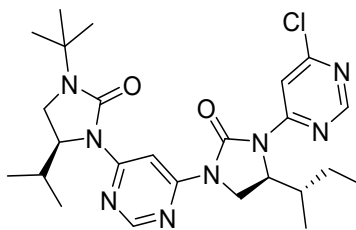

Prepared according to **General Procedure B** using *N*-nosyl deprotected dimer **S22** (0.26 g, 0.63 mmol), 4,6-dichloropyrimidine (0.65 g, 4.44 mmol), Pd<sub>2</sub>(dba)<sub>3</sub> (29 mg, 32 μmol), Xantphos (54 mg, 95 μmol), toluene (10 mL), and Cs<sub>2</sub>CO<sub>3</sub> (0.51 g, 1.50 mmol). Reaction time = 16 h. Then a second portion of Pd<sub>2</sub>(dba)<sub>3</sub> (29 mg, 32 μmol) and Xantphos (72 mg, 95 μmol) was added. The reaction was heated at reflux for a further 5 h. Purification by flash column chromatography (silica gel, petrol:ethyl acetate, 7:1) afforded the chloropyrimidine **1a** (0.23 g, 71%) as a yellow crystalline solid. δ<sub>H</sub> (600 MHz, CDCl<sub>3</sub>): 9.17 (1H, d, *J* 1.0), 8.66 (1H, d, *J*, 0.9), 8.57 (1H, d, *J* 0.9), 8.56 (1H, d, *J* 1.0), 4.86-4.84 (1H, m), 4.54-4.52 (1H, m), 4.08 (1H, dd, *J* 11.2, 2.4), 3.96 (1H, app. t, *J* 10.2), 3.47 (1H, app. t, *J* 9.3), 3.33 (1H, dd, *J* 9.1, 2.5), 2.54-2.51 (1H, m), 2.32-2.31 (1H, m), 1.54 (10H, app. s), 1.34-1.28 (1H, m), 1.01 (3H, app. t, *J* 7.3), 0.96 (3H, app. t, *J* 7.3), 0.96 (3H, d, *J* 7.0), 0.83 (3H, d, *J* 6.9), 0.76 (3H, d, *J* 6.9); δ<sub>C</sub> (151 MHz, CDCl<sub>3</sub>): 161.5, 158.8, 158.3, 157.9, 157.1, 157.1, 156.0, 153.4, 109.9, 69.5, 54.9, 54.5, 54.1, 41.5, 40.5, 34.9, 28.5, 27.8, 25.6, 18.4, 14.6, 12.0, 11.6; HRMS (ESI<sup>+</sup>): found 1067.4789; C<sub>50</sub>H<sub>70</sub>N<sub>16</sub>O<sub>4</sub>Cl<sub>2</sub>K, [2M+K]<sup>+</sup> requires 1067.4780; ν<sub>max</sub> (thin film): 3138.4, 2952.1, 2870.1, 1714.6, 1561.8, 1528.2, 1490.9, 1435.0, 1382.8, 1274.7, 1241.2, 1200.2, 1110.7, 980.3, 931.8, 745.5, 678.4 cm<sup>-1</sup>; [α]<sub>D</sub><sup>20</sup> +24.8 (*c* = 1.3, CHCl<sub>3</sub>).

**(S)-4-((S)-sec-butyl)-3-(6-chloropyrimidin-4-yl)-1-(6-((S)-5-isopropyl-2-oxoimidazolidin-1-yl)pyrimidin-4-yl)imidazolidin-2-one (2a)**

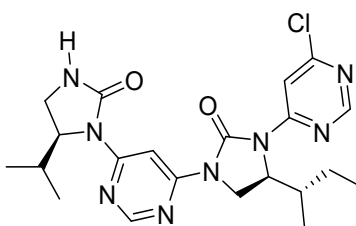

At room temperature, trifluoroacetic acid (5 mL) was added to the chloropyrimidine **1a** (0.18 g, 0.34 mmol). The reaction mixture was stirred and trifluoromethanesulfonic acid (0.6 mL) was subsequently added. When TLC analysis showed all starting material had been consumed, excess trifluoroacetic acid and trifluoromethanesulfonic acid was removed by running a compressed air line over the solution for 1 h. The resulting crude brown residue was taken up in dichloromethane and washed with NaHCO<sub>3</sub>. The layers were separated, and the aqueous layer was further extracted with dichloromethane (2 x 10 mL). The combined organic extracts were dried over anhydrous magnesium sulfate, filtered, and concentrated *in vacuo*. The crude solid was purified by trituration from hot hexane to afford the *tert*-butyl deprotected dimer **2a** (85 mg, 0.19 mmol, 81%)\* as an off-white crystalline solid. δ<sub>H</sub> (600 MHz, CDCl<sub>3</sub>): 9.1 (1H, s), 8.67 (1H, s), 8.59 (1H, s), 8.53 (1H, s), 4.93 (1H, br. s, N-H), 4.86-4.84 (1H, m), 4.77-4.75 (1H, m), 4.08 (1H, dd, *J* 11.1, 2.5), 3.97 (1H, app. t, *J* 10.0), 3.55 (1H, app. t, *J* 9.2), 3.36 (1H, dd, *J* 8.7, 2.0), 2.60 (1H, app. oct, *J* 20.3, 17.1, 13.5, 10.7, 6.8), 2.34-2.33 (1H, m), 1.48-1.44 (1H, m), 1.34-1.28 (1H, m), 1.02 (3H, app. t, *J* 7.24), 0.96 (3H, d, *J* 6.9), 0.88 (3H, d, *J* 6.9), 0.77 (3H, d, *J* 6.7); δ<sub>C</sub> (151 MHz, CDCl<sub>3</sub>): 161.5, 158.6, 158.3, 158.2, 157.9, 157.3, 157.2, 153.5, 109.9, 96.8, 59.0, 54.6, 41.4, 37.7, 34.9, 28.5, 25.6, 18.3, 14.5, 12.0, 11.6; HRMS (ESI<sup>+</sup>): found 511.1736; C<sub>22</sub>H<sub>29</sub>N<sub>8</sub>O<sub>2</sub>ClK, [M+K]<sup>+</sup> requires 511.1739; ν<sub>max</sub> (thin film): 3242.8, 3164.5, 2959.5, 2870.1, 1722.0, 1565.5, 1528.2, 1483.5, 1427.6, 1285.9, 1252.4, 1155.5, 1114.5, 984.0, 924.4, 887.1, 745.5, 674.0 cm<sup>-1</sup>; [α]<sub>D</sub><sup>20</sup> +12.9 (*c* = 0.4, CHCl<sub>3</sub>).

\* Based on recovered starting material. The starting material was soluble in hot hexane.

**(S)-4-((S)-sec-butyl)-1-(tert-butyl)-3-(6-((S)-4-((S)-sec-butyl)-3-((2-nitrophenyl)sulfonyl)-2-oxoimidazolidin-1-yl)pyrimidin-4-yl)imidazolidin-2-one (S23)**

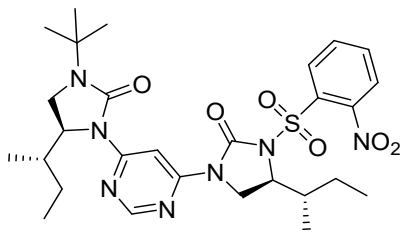

Prepared according to **General Procedure B** using chloropyrimidine **S6** (0.92 g, 2.10 mmol), imidazolidin-2-one **S4** (0.32 g, 1.61 mmol) [added in 2 portions at reaction time = 0 h and at 3 h], Pd(dba)<sub>2</sub> (46 mg, 80 μmol), Xantphos (0.14 g, 0.24 mmol), toluene (8 mL), and K<sub>2</sub>CO<sub>3</sub> (0.56 g, 4.03 mmol). Reaction time = 16 h. Purification by flash column chromatography (silica gel, firstly 10% ethyl acetate:dichloromethane to remove xantphos and xantphos oxide that co-elutes with the product in petrol:ethyl acetate. The column fractions containing the product were concentrated *in vacuo* and subjected to a second column, silica gel, petrol:ethyl acetate 7:1 → 3:1) afforded the di-protected dimer **S23** (0.73 g, 75%) as a pale yellow solid.  $\delta_H$  (600 MHz, CDCl<sub>3</sub>):\* 8.79 (1H, s), 8.55 (1H, d, *J* 7.7), 8.51 (1H, s), 7.79 (1H, t, *J* 7.0), 7.76-7.72 (2H, m), 4.55 (2H, dd, *J* 20.0, 9.1), 4.09-4.02 (1H, m), 3.40 (1H, t, *J* 9.6), 3.27 (1H, dd, *J* 9.1, 2.1), 2.21-2.18 (2H, m), 1.56-1.52 (1H, m), 1.39 (9H, s), 1.33-1.27 (2H, m), 1.23-1.18 (1H, m), 1.02-0.95 (6H, m), 0.85-0.81 (3H, m), 0.77 (3H, d, *J* 6.8);  $\delta_C$  (151 MHz, CDCl<sub>3</sub>): 158.5, 156.9, 156.6, 155.8, 150.8, 148.0, 135.4, 134.7, 132.2, 131.7, 124.2, 96.5, 58.2, 53.8, 53.7, 42.6, 41.3, 39.1, 34.9, 27.5, 25.6, 25.3, 11.82, 11.80, 11.7, 11.6; HRMS (ESI+): found 602.2754; C<sub>28</sub>H<sub>40</sub>N<sub>7</sub>O<sub>6</sub>S, [M+H]<sup>+</sup> requires 602.2761;  $\nu_{max}$  (thin film): 2959.5, 2873.8, 1736.9, 1707.1, 1580.4, 1539.4, 1435.0, 1360.5, 1274.7, 1218.8, 1166.7, 1114.5, 1069.7, 984.0, 875.9, 730.6 cm<sup>-1</sup>;  $[\alpha]_D^{20}$  +76.2 (*c* = 0.7, CHCl<sub>3</sub>).

**(S)-4-((S)-sec-butyl)-1-(tert-butyl)-3-(6-((S)-4-((S)-sec-butyl)-2-oxoimidazolidin-1-yl)pyrimidin-4-yl)imidazolidin-2-one (S24)**

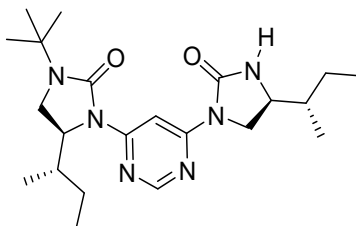

Prepared according to **General Procedure A** using di-protected dimer **S23** (0.41 g, 0.68 mmol), thiophenol (0.1 mL, 1.02 mmol), K<sub>2</sub>CO<sub>3</sub> (0.23 g, 1.69 mmol) and *N,N*-DMF (7 mL). Reaction time = 8 h. Purification by flash column chromatography (silica gel, petrol:ethyl acetate 10:1 → 2:1(product)) afforded **S24** (0.24 g, 85%) as a pale yellow crystalline solid.  $\delta_H$  (400 MHz, CDCl<sub>3</sub>): 8.90 (1H, d, *J* 1.2), 8.50 (1H, d, *J* 1.1), 5.44 (1H, br. s, N-H), 4.59 (1H, dt, *J* 9.3, 3.3), 4.11 (1H, dd, *J* 10.7, 9.2), 3.76 (1H, dd, *J* 10.9, 6.9), 3.61 (1H, app. q, *J* 15.5, 6.6), 3.42 (1H, app. t, *J* 9.3), 3.30 (1H, dd, *J* 9.2, 3.4), 2.35-2.18 (1H, m), 1.57-1.48 (3H, m), 1.40 (10H, s), 1.25-1.23 (1H, m), 0.98-0.89 (9H, m), 0.78 (3H, d, *J* 6.9);  $\delta_C$  (151 MHz, CDCl<sub>3</sub>): 158.3, 158.1, 157.7, 156.9, 156.0, 96.2, 53.8, 53.4, 47.3, 40.5, 39.6, 35.3, 27.7, 25.8, 25.2, 17.4, 13.9, 12.0, 11.8, 11.2; HRMS (ESI+): found 455.2520; C<sub>22</sub>H<sub>36</sub>N<sub>6</sub>O<sub>2</sub>K, [M+K]<sup>+</sup> requires 455.2537;  $\nu_{max}$  (thin film): 3235.3, 2959.5, 2873.8, 1714.6, 1580.4, 1438.8, 1394.0, 1237.5, 1166.7, 1077.2, 1028.7, 984.0, 883.4, 820.0, 752.9, 670.9 cm<sup>-1</sup>;  $[\alpha]_D^{20}$  +54.3 (*c* = 0.7, CHCl<sub>3</sub>).

\* The product was isolated along with a hydrocarbon grease-type contaminant. This led to measured <sup>1</sup>H integrals in the ~0.5-1.5 ppm region being greater than expected, and some additional <sup>13</sup>C peaks in the low ppm range. The reported peaks are those assigned to the product structure on the basis of 2D COSY, HSQC and HMBC experiments.

**(S)-4-((S)-sec-butyl)-1-(tert-butyl)-3-(6-((S)-4-((S)-sec-butyl)-3-(6-chloropyrimidin-4-yl)-2-oxoimidazolidin-1-yl)pyrimidin-4-yl)imidazolidin-2-one (1b)**

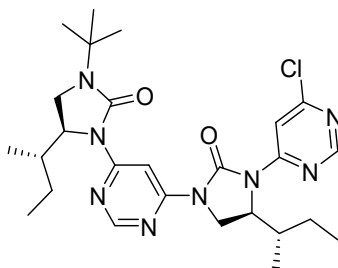

Prepared according to **General Procedure B** using *N*-nosyl deprotected dimer **S24** (0.11 g, 0.25 mmol), 4,6-dichloropyrimidine (0.27 g, 1.78 mmol), Pd<sub>2</sub>(dba)<sub>2</sub> (12 mg, 13 μmol), Xantphos (22 mg, 38 μmol), toluene (3 mL), and K<sub>2</sub>CO<sub>3</sub> (90 mg, 0.64 mmol). Reaction time = 16 h. Purification by flash column chromatography (silica gel, dichloromethane → (impurity) → 10% ethyl acetate:dichloromethane (product)) afforded the chloropyrimidine **1b** (0.11 g, 82%) as a yellow crystalline solid. δ<sub>H</sub> (600 MHz, CDCl<sub>3</sub>): 9.16 (1H, s), 8.66 (1H, s), 8.56 (2H, app. d, *J* 3.47), 4.85 (1H, dt, *J* 9.3, 2.8), 4.63 (1H, dt, *J* 9.5, 2.8), 4.07 (1H, dd, *J* 11.0, 2.1), 3.96 (1H, app. t, *J* 10.3), 3.46 (1H, app. t, *J* 9.4), 3.31 (1H, dd, *J* 9.1, 2.3), 2.34-2.26 (2H, m), 1.44 (11H, app. s), 1.33-1.28 (1H, m), 1.23-1.19 (1H, m), 1.00 (6H, app. dt, *J* 14.6, 7.4), 0.81 (3H, d, *J* 6.8), 0.76 (3H, d, *J* 6.8); δ<sub>C</sub> (151 MHz, CDCl<sub>3</sub>): 161.5, 158.7, 158.3, 157.8, 157.1, 157.1, 156.1, 153.4, 109.9, 96.5, 54.5, 53.9, 41.5, 40.5, 35.2, 34.9, 27.8, 25.8, 25.3, 12.1, 12.0, 11.8, 11.5; HRMS (ESI+): found 529.2803; C<sub>26</sub>H<sub>38</sub>N<sub>8</sub>O<sub>2</sub>Cl, [M+H]<sup>+</sup> requires 529.2806; ν<sub>max</sub> (thin film): 2955.8, 2922.2, 2855.1, 1714.6, 1565.5, 1531.9, 1435.0, 1386.6, 1274.7, 1241.2, 1162.9, 1114.5, 980.3, 928.1, 875.9, 745.5, 678.4 cm<sup>-1</sup>; [α]<sub>D</sub><sup>20</sup> +9.1 (c = 1.3, CHCl<sub>3</sub>).

**(S)-4-((S)-sec-butyl)-1-(6-((S)-5-((S)-sec-butyl)-2-oxoimidazolidin-1-yl)pyrimidin-4-yl)-3-(6-chloropyrimidin-4-yl)imidazolidin-2-one (2b)**

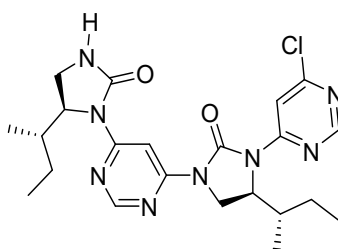

At room temperature, trifluoroacetic acid (mL) was added to the chloropyrimidine **1b** (1.1 g, 0.20 mmol). The reaction mixture was stirred and trifluoromethanesulfonic acid (0.5 mL) was subsequently added. When TLC analysis showed all starting material had been consumed, excess trifluoroacetic acid and trifluoromethanesulfonic acid was removed by running a compressed air line over the solution for 1 h. The resulting crude brown residue was taken up in dichloromethane and washed with NaHCO<sub>3</sub>. The layers were separated, and the aqueous layer was further extracted with dichloromethane (2 x 10 mL). The combined organic extracts were dried over anhydrous magnesium sulfate, filtered, and concentrated *in vacuo*. The crude solid was purified by trituration from hot hexane to afford the *tert*-butyl deprotected dimer **2b** (76 mg, 80%) as a yellow powder. δ<sub>H</sub> (600 MHz, CDCl<sub>3</sub>): 9.14 (1H, s), 8.67 (1H, s), 8.59 (1H, s), 8.53 (1H, s), 5.03 (1H, br. s, N-H), 4.87-4.85 (2H, m), 4.08 (1H, dd, *J* 11.3, 2.3), 3.97 (1H, app. t, *J* 10.1), 3.54 (1H, app. t, *J* 9.1), 3.35 (1H, dd, *J* 8.7, 2.0), 2.39-2.31 (2H, m), 1.46 (1H, app. oct, 27.8, 20.8, 13.8, 7.5), 1.39 (1H, app. oct, *J* 24.8, 18.1, 11.3, 4.0), 1.32 (1H, app. oct, *J* 26.2, 19.8, 16.3, 4.7), 1.22 (1H, app. oct, *J* 29.8, 23.2, 15.3, 7.7), 1.03-0.98 (6H, m), 0.86 (3H, d, *J* 6.8), 0.77 (3H, d, *J* 6.8); δ<sub>C</sub> (151 MHz, CDCl<sub>3</sub>): 161.5, 158.5, 158.3, 158.3, 157.9, 157.3, 157.2, 153.5, 109.9, 96.9, 58.0, 54.6, 41.4, 37.8, 35.2, 34.9, 25.7, 25.6, 12.0, 12.0, 11.8, 11.6; HRMS (ESI+): found 511.1736; C<sub>22</sub>H<sub>29</sub>N<sub>8</sub>O<sub>2</sub>ClK, [M+K]<sup>+</sup> requires 511.1739; ν<sub>max</sub> (thin film): 3235.3, 3149.6, 2967.0, 2933.4, 2877.5, 1729.5, 1561.8, 1479.8, 1431.3, 1382.8, 1252.4, 1155.5, 1118.2, 1088.4, 984.0, 879.7, 752.6, 674.6 cm<sup>-1</sup>; [α]<sub>D</sub><sup>20</sup> +6.4 (c = 1.1, CHCl<sub>3</sub>).

**(S)-1-(tert-butyl)-4-isobutyl-3-(6-((S)-4-isobutyl-3-((2-nitrophenyl)sulfonyl)-2-oxoimidazolidin-1-yl)pyrimidin-4-yl)imidazolidin-2-one (S25)**

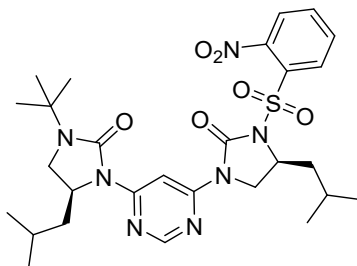

Prepared according to **General Procedure B** using chloropyrimidine **S17** (0.49 g, 1.11 mmol), imidazolidin-2-one **6** (0.20 g, 1.01 mmol), Pd<sub>2</sub>(dba)<sub>3</sub> (50 mg, 55 μmol), Xantphos (0.09 g, 0.15 mmol), toluene (10 mL), and Cs<sub>2</sub>CO<sub>3</sub> (0.81 g, 2.5 mmol). Reaction time = 16 h. Purification by flash column chromatography (silica gel, petrol:ethyl acetate 5:1 → 3:1) afforded the di-protected dimer **S25** (0.55 g, 91%) as a white solid. δ<sub>H</sub> (600 MHz, CDCl<sub>3</sub>): 8.73 (1H, d, *J* 1.0), 8.54 (1H, app. d, *J* 7.9), 8.51 (1H, app. s), 7.78-7.71 (3H, m), 4.55-4.51 (2H, m), 4.20 (1H, app. t, *J* 9.9), 3.96 (1H, app. d, *J* 10.7), 3.51 (1H, app. t, *J* 8.7), 3.18 (1H, app. dd, *J* 8.8, 2.0), 1.92-1.89 (1H, m), 1.79-1.73 (2H, m), 1.71-1.69 (1H, m), 1.40 (10H, s), 1.03-0.98 (9H, m), 0.93 (3H, d, *J* 6.2); δ<sub>C</sub> (151 MHz, CDCl<sub>3</sub>): 158.6, 157.1, 155.7, 150.6, 148.1, 135.4, 134.9, 132.4, 131.9, 124.4, 96.8, 53.8, 53.8, 49.9, 47.5, 45.7, 45.0, 41.6, 29.9, 27.7, 25.1, 24.9, 23.9, 23.6, 21.9, 21.7; HRMS (ESI<sup>+</sup>): found 602.2771; C<sub>28</sub>H<sub>40</sub>N<sub>7</sub>O<sub>6</sub>S, [M+H]<sup>+</sup> requires 602.2761; ν<sub>max</sub> (thin film): 2959.5, 2870.1, 1744.4, 1699.7, 1580.4, 1550.6, 1468.6, 1435.0, 1364.2, 1278.5, 1222.6, 1170.4, 1118.2, 868.5, 782.7, 745.5, 670.9 cm<sup>-1</sup>; [α]<sub>D</sub><sup>20</sup> +94.1 (*c* = 1.1, CHCl<sub>3</sub>).

**(S)-1-(tert-butyl)-4-isobutyl-3-(6-((S)-4-isobutyl-2-oxoimidazolidin-1-yl)pyrimidin-4-yl)imidazolidin-2-one (S26)**

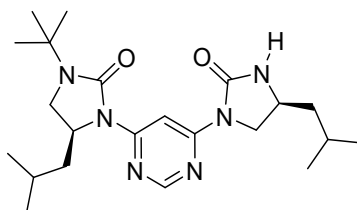

Prepared according to **General Procedure A** using di-protected dimer **S25** (1.52 g, 2.53 mmol), thiophenol (0.36 mL, 3.79 mmol), K<sub>2</sub>CO<sub>3</sub> (1.05 g, 7.59 mmol) and *N,N*-DMF (30 mL). Reaction time = 2 h. Purification by flash column chromatography (silica gel, petrol:ethyl acetate 7:1 → 4:1(product)) afforded **S26** (1.03 g, 98 %) as a pale yellow crystalline solid. δ<sub>H</sub> (400 MHz, CDCl<sub>3</sub>): 8.90 (1H, d, *J* 0.8), 8.50 (1H, d, *J* 0.8), 5.37 (1H, br. s, N-H), 4.59-4.54 (1H, m), 4.19 (1H, app. t, *J* 9.6), 3.83 (1H, app. quint, *J* 21.6, 13.8, 6.8), 3.70-3.65 (1H, m), 3.54 (1H, t, *J* 8.6), 3.18 (1H, dd, *J* 8.8, 2.7), 1.77-1.69 (2H, m), 1.67-1.60 (1H, m), 1.58-1.51 (1H, m), 1.47-1.41 (1H, m), 1.41 (10H, app. s), 1.01-0.93 (12H, m); δ<sub>C</sub> (101 MHz, CDCl<sub>3</sub>): 158.2, 158.2, 157.6, 157.0, 155.9, 96.1, 53.7, 50.0, 49.7, 47.4, 45.7, 45.4, 41.8, 27.7, 25.1, 25.1, 23.9, 23.0, 22.5, 21.9; HRMS (ESI<sup>+</sup>): found 417.2984; C<sub>22</sub>H<sub>37</sub>N<sub>6</sub>O<sub>2</sub>, [M+H]<sup>+</sup> requires 417.2978; ν<sub>max</sub> (thin film): 3235.3, 3123.5, 2955.8, 2929.7, 2870.1, 1718.3, 1572.9, 1535.7, 1438.8, 1390.3, 1364.2, 1259.8, 1230.0, 1162.9, 1073.5, 980.3, 752.9, 670.9 cm<sup>-1</sup>; [α]<sub>D</sub><sup>20</sup> +56.0 (*c* = 1.1, CHCl<sub>3</sub>).

**(S)-1-(*tert*-butyl)-3-(6-((S)-3-(6-chloropyrimidin-4-yl)-4-isobutyl-2-oxoimidazolidin-1-yl)pyrimidin-4-yl)-4-isobutylimidazolidin-2-one (1c)**

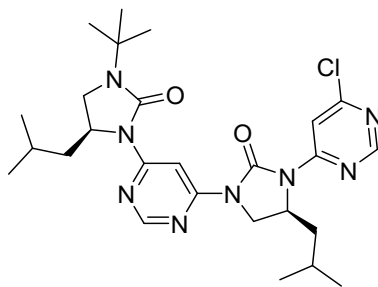

Prepared according to **General Procedure B** using *N*-nosyl deprotected dimer **S26** (0.13 g, 0.31 mmol), 4,6-dichloropyrimidine (0.32 g, 2.15 mmol), Pd<sub>2</sub>(dba)<sub>3</sub> (14 mg, 15 μmol), Xantphos (27 mg, 0.05 mmol), toluene (3 mL), and Cs<sub>2</sub>CO<sub>3</sub> (0.25 g, 0.77 mmol). Reaction time = 16 h. Purification by flash column chromatography (silica gel, petrol:ethyl acetate, 10:1 → 5:1) afforded the chloropyrimidine **1c** (0.14 g, 86%) as a yellow crystalline solid. δ<sub>H</sub> (600 MHz, CDCl<sub>3</sub>): 9.09 (1H, d, *J* 0.9), 8.67 (1H, s), 8.56 (1H, d, *J* 0.8), 8.51 (1H, s), 4.81-4.78 (1H, m) 4.62-4.59 (1H, m), 4.08 (1H, app. t, *J* 10.1), 4.03 (1H, app. dd, *J* 10.7, 1.7), 3.58 (1H, app. t, *J* 8.7), 3.23 (1H, app. dd, *J* 8.6, 1.7), 1.84-1.80 (1H, m), 1.76-1.72 (2H, m), 1.70-1.65 (1H), 1.45 (12H, app. s), 1.05 (3H, d, *J* 6.3), 1.02 (3H, d, *J* 6.3), 0.96 (6H, app. d, *J* 6.4); δ<sub>C</sub> (151 MHz, CDCl<sub>3</sub>): 161.4, 158.5, 158.2, 157.9, 157.4, 157.2, 155.8, 152.9, 109.8, 96.6, 53.9, 50.5, 49.9, 46.4, 45.7, 41.9, 41.6, 27.7, 25.2, 25.0, 24.0, 23.9, 21.9, 21.6; HRMS (ESI<sup>+</sup>): found 529.2795; C<sub>26</sub>H<sub>38</sub>N<sub>8</sub>O<sub>2</sub>Cl, [M+H]<sup>+</sup> requires 529.2806; ν<sub>max</sub> (thin film): 2955.8, 2870.1, 1736.9, 1707.1, 1561.8, 1431.3, 1386.6, 1274.7, 1222.6, 1162.9, 1110.7, 984.0, 864.7, 745.5, 670.9 cm<sup>-1</sup>; [α]<sub>D</sub><sup>20</sup> +18.1 (*c* = 0.9, CHCl<sub>3</sub>).

**(S)-3-(6-chloropyrimidin-4-yl)-4-isobutyl-1-(6-((S)-5-isobutyl-2-oxoimidazolidin-1-yl)pyrimidin-4-yl)imidazolidin-2-one (2c)**

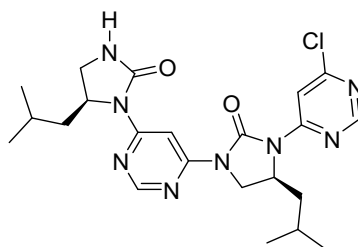

At room temperature, trifluoroacetic acid (27 mL) was added to the chloropyrimidine **1c** (1.43 g, 2.70 mmol). The reaction mixture was stirred and trifluoromethanesulfonic acid (4.3 mL) was subsequently added. When TLC analysis showed all starting material had been consumed, excess trifluoroacetic acid and trifluoromethanesulfonic acid was removed by running a compressed air line over the solution for 1 h. The resulting crude brown residue was taken up in dichloromethane and washed with NaHCO<sub>3</sub>. The layers were separated, and the aqueous layer was further extracted with dichloromethane (2 x 10 mL). The combined organic extracts were dried over anhydrous magnesium sulfate, filtered, and concentrated *in vacuo*. The crude solid was purified by flash column chromatography (silica gel, petrol:ethyl acetate, 5:1 → 2:1) afforded the *tert*-butyl deprotected dimer **2c** (0.76 g, 60%) as an off-white crystalline solid. δ<sub>H</sub> (600 MHz, CDCl<sub>3</sub>): 9.06 (1H, d, *J* 0.8), 8.67 (1H, d, *J* 0.8), 8.58 (1H, d, *J* 0.8), 8.46 (1H, d, *J* 0.8), 5.47 (1H, br. s, N-H), 4.82-4.78 (2H, m), 4.10 (1H, app. t, *J* 9.9), 4.02 (1H, app. dd, *J* 10.7, 1.8), 3.68 (1H, app. t, *J* 8.7), 3.28 (1H, app. d, *J* 8.4), 1.85-1.73 (3H, m), 1.72-1.69 (1H, m), 1.58-1.54 (1H, m), 1.49-1.45 (1H, m), 1.03 (6H, app. t, *J* 7.1), 0.96 (6H, app. d, *J* 6.2); δ<sub>C</sub> (151 MHz, CDCl<sub>3</sub>): 161.4, 158.4, 158.2, 158.0, 158.0, 157.5, 157.3, 153.0, 109.7, 96.7, 53.8, 50.5, 46.4, 43.0, 41.9, 41.6, 25.0, 25.0, 23.9, 23.9, 21.8, 21.6; HRMS (ESI<sup>+</sup>): found 473.2195; C<sub>22</sub>H<sub>30</sub>N<sub>8</sub>O<sub>2</sub>Cl, [M+H]<sup>+</sup> requires 473.2180; ν<sub>max</sub> (thin film): 3250.2, 3138.4, 2870.1, 2955.8, 2626.0, 2870.1, 1722.0, 1561.8, 1531.9, 1431.3, 1364.2, 1282.2, 1244.9, 1222.6, 1114.5, 984.0, 864.7, 745.5, 667.2 cm<sup>-1</sup>; [α]<sub>D</sub><sup>20</sup> +5.9 (*c* = 1.1, CHCl<sub>3</sub>).

**(S)-1-(tert-butyl)-4-isopropyl-3-(6-((S)-4-isopropyl-3-((2-nitrophenyl)sulfonyl)-2-oxoimidazolidin-1-yl)pyrimidin-4-yl)imidazolidin-2-one (S27)**

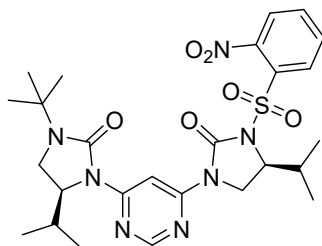

Prepared according to **General Procedure B** using chloropyrimidine **S12** (0.86 g, 2.02 mmol), imidazolidin-2-one **S10** (0.27 g, 1.47 mmol) [added in 2 portions at reaction time = 0 h and at 3 h], Pd<sub>2</sub>(dba)<sub>3</sub> (70 mg, 80 μmol), Xantphos (0.13 g, 0.23 mmol), toluene (8 mL), and K<sub>2</sub>CO<sub>3</sub> (0.54 g, 3.88 mmol). Reaction time = 16 h. Purification by flash column chromatography (silica gel, firstly 10% ethyl acetate:dichloromethane to remove xantphos and xantphos oxide that co-elutes with the product in petrol:ethyl acetate. The column fractions containing the product were concentrated *in vacuo* and subjected to a second column, silica gel, petrol:ethyl acetate 7:1 → 1:1) afforded the di-protected dimer **S27** (0.70 g, 83%) as a pale yellow solid. δ<sub>H</sub> (600 MHz, CDCl<sub>3</sub>): 8.79 (1H, s), 8.55-8.34 (1H, m), 8.51 (1H, s), 7.80-7.71 (3H, m), 4.47-4.46 (1H, m), 4.43-4.41 (1H, m), 4.12-4.03 (2H, m), 3.40 (1H, app. t, *J* 9.4), 3.29 (1H, dd, *J* 9.1, 2.4), 2.47-2.45 (1H, m), 2.41-2.38 (1H, m), 1.39 (9H, s), 1.02 (3H, d, *J* 6.8), 0.95 (3H, d, *J* 6.8), 0.83 (3H, d, *J* 6.8), 0.78 (3H, d, *J* 6.8); δ<sub>C</sub> (151 MHz, CDCl<sub>3</sub>): 158.8, 157.1, 156.8, 155.9, 150.9, 148.2, 135.7, 134.9, 132.4, 131.9, 124.4, 96.6, 59.4, 54.9, 54.0, 43.1, 40.4, 32.6, 28.5, 27.7, 18.4, 18.0, 15.0, 14.5; HRMS (ESI<sup>+</sup>): found 574.2438; C<sub>26</sub>H<sub>36</sub>N<sub>7</sub>O<sub>6</sub>S, [M+H]<sup>+</sup> requires 574.2448; ν<sub>max</sub> (thin film): 2959.5, 1736.9, 1707.1, 1580.4, 1546.8, 1371.7, 1207.7, 1174.1, 1066.0, 872.2, 775.3, 715.6 cm<sup>-1</sup>; [α]<sub>D</sub><sup>20</sup> +88.7 (*c* = 1.0, CHCl<sub>3</sub>).

**(S)-1-(tert-butyl)-4-isopropyl-3-(6-((S)-4-isopropyl-2-oxoimidazolidin-1-yl)pyrimidin-4-yl)imidazolidin-2-one (S28)**

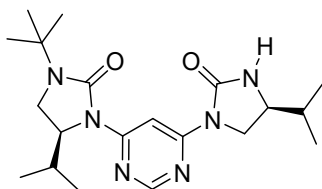

Prepared according to General Procedure A using di-protected dimer **S27** (0.69 g, 1.21 mmol), thiophenol (0.17 mL, 1.82 mmol), K<sub>2</sub>CO<sub>3</sub> (0.50 g, 3.63 mmol) and *N,N*-DMF (12 mL). Reaction time = 2 h. Purification by flash column chromatography (silica gel, petrol:ethyl acetate 7:1 → 3:1 → 1:1 (product)) afforded **S28** (0.32 g, 69 %) as a yellow crystalline solid. δ<sub>H</sub> (400 MHz, CDCl<sub>3</sub>): 9.01 (1H, s), 8.50 (1H, s), 5.71 (1H, br. s), 4.51-4.47 (1H, s), 4.13 (1H, app. t, *J* 10.2), 3.76 (1H, app. dd, *J* 10.65, 6.7), 3.51 (1H, app. q, *J* 15.5, 7.3), 3.43 (1H, app. t, *J* 9.2), 3.29 (1H, app. dd, *J* 9.1, 2.7), 2.52-2.44 (1H, m), 1.78-1.70 (1H, m), 1.41 (9H, s), 0.99 (3H, d, *J* 6.8), 0.94 (6H, app. dd, *J* 10.2, 6.8), 0.80 (3H, d, *J* 6.8); δ<sub>C</sub> (101 MHz, CDCl<sub>3</sub>): 158.5, 158.3, 157.9, 157.0, 156.0, 96.2, 54.9, 53.9, 47.8, 40.6, 33.4, 28.7, 27.8, 18.5, 18.3, 17.9, 14.7; HRMS (ESI<sup>+</sup>): found 389.2660; C<sub>20</sub>H<sub>33</sub>N<sub>6</sub>O<sub>2</sub>, [M+H]<sup>+</sup> requires 389.2665; ν<sub>max</sub> (thin film): 3213.0, 3112.3, 2959.5, 2873.8, 1707.1, 1569.2, 1461.1, 1438.8, 1386.6, 1244.9, 1162.9, 980.3, 883.4, 756.6, 670.9 cm<sup>-1</sup>; [α]<sub>D</sub><sup>20</sup> +54.7 (*c* = 1.0, CHCl<sub>3</sub>).

**(S)-1-(tert-butyl)-3-(6-((S)-3-(6-chloropyrimidin-4-yl)-4-isopropyl-2-oxoimidazolidin-1-yl)pyrimidin-4-yl)-4-isopropylimidazolidin-2-one (1d)**

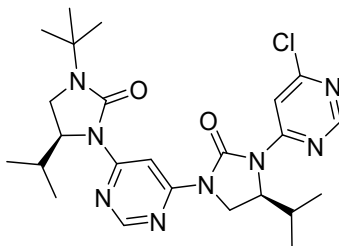

Prepared according to **General Procedure B** using *N*-nosyl deprotected dimer **S28** (0.32 g, 0.82 mmol), 4,6-dichloropyrimidine (0.87 g, 5.82 mmol), Pd<sub>2</sub>(dba)<sub>3</sub> (38 mg, 42 μmol), Xantphos (72 mg, 0.12 mmol), toluene (5 mL), and K<sub>2</sub>CO<sub>3</sub> (0.29 g, 2.08 mmol). Reaction time = 16 h. Then a second portion of Pd<sub>2</sub>(dba)<sub>3</sub> (38 mg, 42 μmol) and Xantphos (72 mg, 0.12 mmol) was added. The reaction was heated at reflux for a further 5 h. Purification by flash column chromatography (silica gel, petrol:ethyl acetate, 7:1 → 2:1) afforded the chloropyrimidine **1d** (0.19 g, 46%) as an off-white foam. δ<sub>H</sub> (400 MHz, CDCl<sub>3</sub>): 9.17 (1H, s), 8.65 (1H, s), 8.56 (1H, s), 4.76-4.73 (1H, m), 4.54-4.52 (1H, m), 4.10 (1H, dd, *J* 11.2, 2.4), 3.95 (1H, app. t, *J* 10.3), 3.47 (1H, app. t, *J* 9.3), 3.33 (1H, dd, *J* 9.3, 2.4), 2.60-2.49 (2H, m), 1.45 (9H, s), 1.02 (3H, d, *J* 7.0), 0.96 (3H, d, *J* 7.0), 0.83 (3H, d, *J* 7.0), 0.78 (3H, d, *J* 7.0); δ<sub>C</sub> (101 MHz, CDCl<sub>3</sub>): 161.5, 158.8, 158.4, 157.8, 157.1, 157.1, 156.0, 153.3, 109.9, 96.5, 55.6, 54.9, 54.0, 41.4, 40.5, 28.5, 28.3, 27.8, 18.4, 18.2, 14.6, 14.1; HRMS (ESI<sup>+</sup>): found 501.2498; C<sub>24</sub>H<sub>34</sub>N<sub>8</sub>O<sub>2</sub>SCl, [M+H]<sup>+</sup> requires 501.2493; ν<sub>max</sub> (thin film): 3145.9, 2959.5, 2873.8, 1710.8, 1561.8, 1531.9, 1431.3, 1386.6, 1237.5, 1207.7, 1114.5, 984.0, 864.7, 678.4 cm<sup>-1</sup>; [α]<sub>D</sub><sup>20</sup> +19 (c = 1.0, CHCl<sub>3</sub>).

**(S)-3-(6-chloropyrimidin-4-yl)-4-isopropyl-1-(6-((S)-5-isopropyl-2-oxoimidazolidin-1-yl)pyrimidin-4-yl)imidazolidin-2-one (2d)**

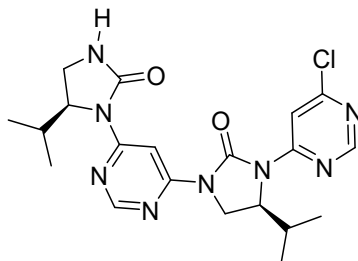

At room temperature, trifluoroacetic acid (21 mL) was added to the chloropyrimidine **1d** (0.76 g, 1.51 mmol). The reaction mixture was stirred and trifluoromethanesulfonic acid (2 mL) was subsequently added. When TLC analysis showed all starting material had been consumed, excess trifluoroacetic acid and trifluoromethanesulfonic acid was removed by running a compressed air line over the solution for 1 h. The resulting crude brown residue was taken up in dichloromethane and washed with NaHCO<sub>3</sub>. The layers were separated, and the aqueous layer was further extracted with dichloromethane (2 x 10 mL). The combined organic extracts were dried over anhydrous magnesium sulfate, filtered, and concentrated *in vacuo*. The crude solid was purified by trituration in hot hexane to afford the *tert*-butyl deprotected dimer **2d** (0.54 g, 80 %) as an off-white crystalline solid. δ<sub>H</sub> (400 MHz, CDCl<sub>3</sub>): 9.13 (1H, s), 8.66 (1H, s), 8.60 (1H, s), 8.52 (1H, s), 5.17 (1H, br. s), 4.77-4.74 (2H, m), 4.11 (1H, dd, *J* 11.4, 2.4), 3.97 (1H, app. t, *J* 10.1), 3.56 (1H, app. t, *J* 9.3), 3.37 (1H, dd, *J* 9.0, 2.2), 2.63-2.54 (2H, m), 1.06 (3H, d, *J* 6.9), 0.96 (3H, d, *J* 6.9), 0.88 (3H, d, *J* 6.8), 0.79 (3H, d, *J* 6.8); δ<sub>C</sub> (101 MHz, CDCl<sub>3</sub>): 161.4, 158.4, 158.2, 158.1, 157.7, 157.2, 157.0, 153.2, 109.7, 96.6, 58.9, 55.5, 41.2, 37.6, 28.4, 28.2, 18.1, 18.0, 14.4, 14.0; HRMS (ESI<sup>+</sup>): found 445.1857; C<sub>20</sub>H<sub>26</sub>N<sub>8</sub>O<sub>2</sub>Cl, [M+H]<sup>+</sup> requires 445.1867; ν<sub>max</sub> (thin film): 3231.6, 3142.1, 2959.5, 1729.5, 1561.8, 1427.6, 1382.8, 1252.4, 1114.5, 984.0, 872.2, 764.1, 674.6 cm<sup>-1</sup>; [α]<sub>D</sub><sup>20</sup> +9.13 (c = 1.0, CHCl<sub>3</sub>).

**(S)-1-(tert-butyl)-4-isobutyl-3-(6-((S)-4-isobutyl-3-(6-((S)-4-isobutyl-3-((2-nitrophenyl)sulfonyl)-2-oxoimidazolidin-1-yl)pyrimidin-4-yl)-2-oxoimidazolidin-1-yl)pyrimidin-4-yl)imidazolidin-2-one (S29)**

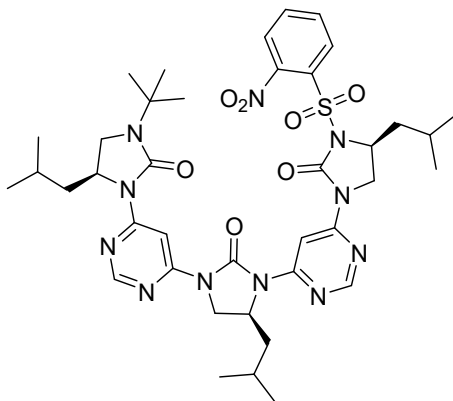

Prepared according to **General Procedure B** using chloropyrimidine **1c** (0.12 g, 0.22 mmol), imidazolidin-2-one **6** (93 mg, 0.28 mmol) [added in one portion at reaction time = 0], Pd<sub>2</sub>(dba)<sub>3</sub> (10 mg, 11 μmol), Xantphos (19 mg, 33 μmol), toluene (2 mL), and K<sub>2</sub>CO<sub>3</sub> (80 mg, 0.55 mmol). Reaction time = 16 h. Purification by flash column chromatography (silica gel, petrol:ethyl acetate 5:1 → 2:1) afforded the di-protected trimer **S29** (98 mg, 73%) as a pale yellow solid.  $\delta_H$  (400 MHz, CDCl<sub>3</sub>):\* 8.95 (1H, d, *J* 1.2), 8.81 (1H, d, *J* 1.2), 8.58 (1H, d, *J* 0.9), 8.54 (1H, d, *J* 0.9), 8.53-8.50 (1H, m), 7.82-7.71 (3H, m), 4.78-4.71 (1H, m), 4.63-4.52 (2H, m), 4.22 (1H, dd, *J* 10.6, 8.5), 4.03 (1H, dd, *J* 10.6, 8.4), 3.99-3.91 (2H, m), 3.57 (1H, t, *J* 8.6), 3.23 (1H, dd, *J* 8.8, 2.5), 1.97-1.91 (1H, m), 1.85-1.64 (6H, m), 1.47 (9H, s), 1.45-1.39 (2H, m), 1.06-1.00 (12H, m), 0.96 (3H, d, *J* 6.4), 0.93 (3H, d, *J* 6.4);  $\delta_C$  (151 MHz, CDCl<sub>3</sub>): 158.3, 157.8, 157.6, 157.5, 157.0, 156.9, 155.6, 152.7, 150.4, 147.9, 135.5, 134.8, 132.3, 131.5, 124.3, 98.0, 97.0, 53.72, 53.68, 50.4, 49.8, 47.5, 46.3, 45.6, 45.0, 41.8, 41.5, 27.6, 25.0, 24.9, 24.8, 23.83, 23.76, 23.4, 21.8, 21.7, 21.6; HRMS (ESI+): found 858.3474; C<sub>39</sub>H<sub>53</sub>N<sub>11</sub>O<sub>7</sub>K, [M+K]<sup>+</sup> requires 858.3487;  $\nu_{max}$  (thin film): 2955.8, 2922.2, 2855.1, 1714.6, 1576.7, 1543.1, 1427.6, 1364.2, 1215.1, 1170.4, 1110.7, 875.9, 745.5, 670.9 cm<sup>-1</sup>;  $[\alpha]_D^{20}$  +1.8 (*c* = 1.1, CHCl<sub>3</sub>).

**(S)-1-(tert-butyl)-4-isobutyl-3-(6-((S)-4-isobutyl-3-(6-((S)-4-isobutyl-2-oxoimidazolidin-1-yl)pyrimidin-4-yl)-2-oxoimidazolidin-1-yl)pyrimidin-4-yl)imidazolidin-2-one (S30)**

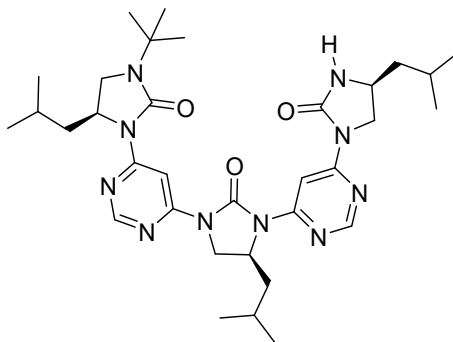

Prepared according to **General Procedure A** using di-protected trimer **S29** (0.50 g, 0.61 mmol), thiophenol (90 μL, 0.91 mmol), K<sub>2</sub>CO<sub>3</sub> (0.25 g, 1.83 mmol) and *N,N*-DMF (6 mL). Reaction time = 5 h. Purification by flash column chromatography (silica gel, petrol:ethyl acetate 7:1 → 5:1 → 3:1 → 1:1 (product)) afforded **S30** (0.35 g, 90 %) as a pale yellow crystalline solid.  $\delta_H$  (400 MHz, CDCl<sub>3</sub>): 9.00 (1H, d, *J* 1.2), 8.94 (1H, d, *J* 1.1), 8.58 (1H, d, *J* 1.2), 8.54 (1H, d, *J* 1.2), 5.01 (1H, br s), 4.85-4.77 (1H, m), 4.60-4.53 (1H, m), 4.21 (1H, dd, *J* 10.5, 8.5), 4.08 (1H, dd, *J* 10.5, 8.7), 3.94 (1H, dd, *J* 10.7, 3.1), 3.86 (1H, quintet, *J* 7.2), 3.70 (1H, dd, *J* 10.5, 6.7), 3.55 (1H, t, *J* 8.6), 3.19 (1H, dd, *J* 8.8, 2.6), 1.86-1.62 (5H, m), 1.59-1.43 (5H, m), 1.41 (9H, s), 1.02 (6H, app. t, *J* 6.1), 0.98-0.92 (12H, m);  $\delta_C$  (101 MHz, CDCl<sub>3</sub>):

\* A trace impurity was observed in the aromatic region with an integration of 0.08 relative to the title compound, e.g.  $\delta$  = 9.08 (0.08H, d, *J* 1.2).



158.5, 158.3, 157.7, 157.3, 157.2, 156.9, 156.8, 152.9, 97.3, 96.9, 53.7, 50.1, 49.9, 49.8, 47.3, 46.3, 45.6, 45.2, 42.1, 41.5, 27.6, 25.0,\* 24.8, 23.81, 23.77, 22.8, 22.4, 21.8, 21.6; HRMS (ESI+): found 673.3727; C<sub>33</sub>H<sub>50</sub>N<sub>10</sub>O<sub>3</sub>K, [M+K]<sup>+</sup> requires 673.3704;  $\nu_{max}$  (thin film): 2922.2, 2955.8 1718.3, 1580.4, 1423.8, 1356.8, 1215.1, 984.0, 752.9, 670.9 cm<sup>-1</sup>;  $[\alpha]_D^{20}$  +40.4 (c = 1.4, CHCl<sub>3</sub>).

**(S)-1-(tert-butyl)-3-(6-((S)-3-(6-((S)-3-(6-chloropyrimidin-4-yl)-4-isobutyl-2-oxoimidazolidin-1-yl)pyrimidin-4-yl)-4-isobutyl-2-oxoimidazolidin-1-yl)pyrimidin-4-yl)-4-isobutylimidazolidin-2-one (S31)**

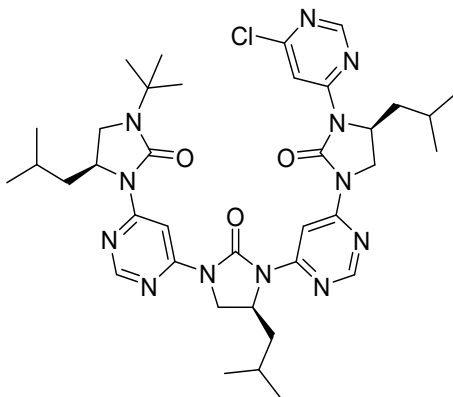

Prepared according to **General Procedure B** using *N*-nosyl deprotected trimer **S30** (72 mg, 0.11 mmol), 4,6-dichloropyrimidine (0.15 g, 1.02 mmol), Pd<sub>2</sub>(dba)<sub>3</sub> (5 mg, 6 μmol), Xantphos (12 mg, 20 μmol), toluene (2 mL), and K<sub>2</sub>CO<sub>3</sub> (39 mg, 0.28 mmol). Reaction time = 16 h. Purification by flash column chromatography (silica gel, petrol:ethyl acetate, 7:1 → 3:1) afforded the chloropyrimidine **S31** (51 mg, 62%) as a yellow crystalline solid.  $\delta_H$  (400 MHz, CDCl<sub>3</sub>): 9.12 (1H, d, *J* 1.0), 8.99 (1H, d, *J* 1.0), 8.67 (1H, d, *J* 0.8), 8.63 (1H, d, *J* 1.0), 8.55 (1H, d, *J* 1.0), 8.49 (1H, d, *J* 0.8), 4.85-4.76 (2H, m), 4.60-4.52 (1H, m), 4.16-4.07 (2H, m), 4.03 (1H, dd, *J* 10.7, 2.4), 3.98 (1H, dd, *J* 10.7, 2.5), 3.56 (1H, t, *J* 8.5), 3.21 (1H, dd, *J*, 8.7, 2.3), 1.88-1.63 (6H, m), 1.56-1.46 (3H, m), 1.43 (9H, s), 1.08-1.00 (9H, m), 0.99-0.92 (9H, m);  $\delta_C$  (101 MHz, CDCl<sub>3</sub>): 161.3, 158.4, 158.0, 157.82, 157.79, 157.7, 157.6, 157.1, 156.9, 155.6, 152.9, 152.7, 109.7, 97.9, 97.2, 53.7, 50.42, 50.37, 50.0, 46.38, 46.36, 45.6, 41.9, 41.7, 41.4, 27.6, 25.0, 24.9,† 23.83, 23.79, 23.7, 21.8, 21.6, 21.5; HRMS (ESI+): found 785.3542; C<sub>37</sub>H<sub>51</sub>N<sub>12</sub>O<sub>3</sub>ClK, [M+K]<sup>+</sup> requires 785.3533;  $\nu_{max}$  (thin film): 2955.8, 2870.1, 1722.0, 1565.5, 1438.8, 1360.5, 1218.8, 984.0, 875.9, 745.5, 670.9 cm<sup>-1</sup>;  $[\alpha]_D^{20}$  -5.5 (c = 3.1, CHCl<sub>3</sub>).

\* HMBC experiment indicated this peak corresponds to two carbon atoms.

† An HSQC experiment indicates that this peak corresponds to two separate <sup>13</sup>C positions.

**(S)-3-(6-chloropyrimidin-4-yl)-4-isobutyl-1-(6-((S)-5-isobutyl-3-(6-((S)-5-isobutyl-2-oxoimidazolidin-1-yl)pyrimidin-4-yl)-2-oxoimidazolidin-1-yl)pyrimidin-4-yl)imidazolidin-2-one (4a)**

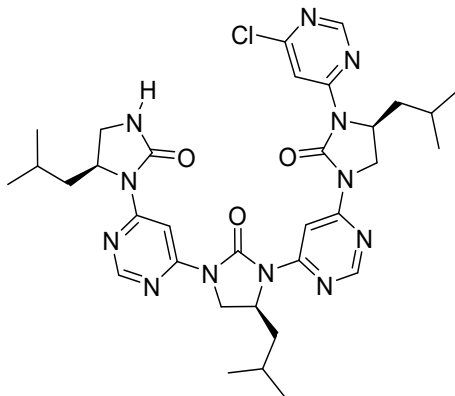

At room temperature, trifluoroacetic acid (2 mL) was added to the chloropyrimidine **S31** (47 mg, 63  $\mu\text{mol}$ ). The reaction mixture was stirred and trifluoromethanesulfonic acid (0.5 mL) was subsequently added. When TLC analysis showed all starting material had been consumed, excess trifluoroacetic acid and trifluoromethanesulfonic acid was removed by running a compressed air line over the solution for 1 h. The resulting crude brown residue was taken up in dichloromethane and washed with  $\text{NaHCO}_3$ . The layers were separated, and the aqueous layer was further extracted with dichloromethane (2 x 10 mL). The combined organic extracts were dried over anhydrous magnesium sulfate, filtered, and concentrated *in vacuo*. The crude solid was used without any further purification. The *tert*-butyl deprotected trimer **4a** (0.44 g, >99%) was obtained as a pale yellow crystalline solid.  $\delta_H$  (600 MHz,  $\text{CDCl}_3$ ): 9.11 (1H, s), 8.99 (1H, s), 8.66 (1H, s), 8.62 (1H, s), 8.56 (1H, s), 8.44 (1H, s), 5.42 (1H, br. s, N-H), 4.82-4.77 (3H, m), 4.11 (1H, app. t,  $J$  9.3), 4.03 (1H, d,  $J$  10.2), 3.99 (1H, d,  $J$  10.2), 3.70 (1H, app. t,  $J$  8.1), 3.27 (1H, d,  $J$  8.1), 1.85-1.80 (3H, m), 1.80-1.77 (3H, m), 1.56-1.52 (1H, m), 1.48-1.46 (2H, m), 1.04 (6H, app. br. s), 1.00 (3H, d,  $J$  6.9), 0.95 (9H, dd,  $J$  14.0, 6.0);  $\delta_C$  (151 MHz,  $\text{CDCl}_3$ ): 161.5, 158.3, 158.1, 158.0, 157.9, 157.9, 157.8, 157.8, 157.2, 157.1, 153.0, 152.8, 109.7, 109.7, 97.7, 97.0, 53.9, 50.5, 46.5, 46.5, 43.1, 42.1, 41.9, 41.5, 25.1, 25.0, 25.0, 23.9, 23.9, 22.7, 21.8, 21.7, 21.6, 19.6; HRMS (ESI+): found 729.2920;  $\text{C}_{33}\text{H}_{43}\text{N}_{12}\text{O}_3\text{Cl}$ ,  $[\text{M}+\text{K}]^+$  requires 729.2907;  $\nu_{\text{max}}$  (thin film): 3138.4, 2952.1, 2866.3, 2363.1, 1722.0, 1561.8, 1531.9, 1420.1, 1356.8, 1203.9, 1110.7, 1058.6, 984.0, 864.7, 745.5, 663.5  $\text{cm}^{-1}$ ;  $[\alpha]_{\text{D}}^{20}$  -42.4 ( $c = 1.8$ ,  $\text{CHCl}_3$ ).

**(S)-4-((S)-*sec*-butyl)-1-(*tert*-butyl)-3-(6-((S)-4-isopropyl-3-((2-nitrophenyl)sulfonyl)-2-oxoimidazolidin-1-yl)pyrimidin-4-yl)imidazolidin-2-one (S32)**

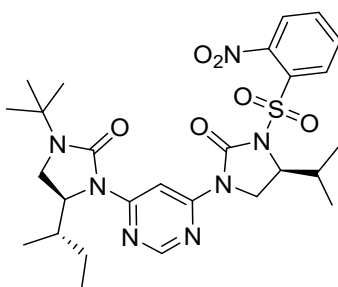

Prepared according to **General Procedure B** using chloropyrimidine **S12** (0.50 g, 1.17 mmol), *N*-nosyl deprotected imidazolidin-2-one **S4** (0.19 g, 0.96 mmol) [added in 2 portions at reaction time = 0 h and at 3 h],  $\text{Pd}(\text{dba})_2$  (44 mg, 49  $\mu\text{mol}$ ), Xantphos (84 mg, 0.15 mmol), toluene (9.7 mL), and  $\text{Cs}_2\text{CO}_3$  (0.79 g, 2.43 mmol). Reaction time = 16 h. Then a second portion of  $\text{Pd}_2(\text{dba})_3$  (44 mg, 49  $\mu\text{mol}$ ) and Xantphos (84 mg, 0.15 mmol) was added. The reaction was heated at reflux for a further 5 h. Purification by flash column chromatography (silica gel, firstly 10% ethyl acetate:dichloromethane to remove xantphos and xantphos oxide that co-elutes with the product in petrol:ethyl acetate. The column fractions containing the product were concentrated *in vacuo* and subjected to a second column, silica gel, petrol:ethyl acetate 7:1  $\rightarrow$  3:1) afforded the di-protected dimer **S32** (0.37 g, 65%) as a pale yellow solid.  $\delta_H$  (600 MHz,  $\text{CDCl}_3$ ): 8.78 (1H, s), 8.55 (1H, d,  $J$  8.1), 8.52 (1H, s), 7.81-7.78 (1H, m), 7.76-7.72 (2H, m), 4.58-4.56 (1H, m), 4.42 (1H, m), 4.09 (1H, app. t,  $J$  10.5), 4.05 (1H, app. dd,  $J$  10.7, 1.7), 3.40 (1H, app. t,  $J$  8.9), 3.27 (1H, dd,  $J$  9.2, 2.7), 2.39 (1H, app. oct,  $J$  20.3, 17.1, 13.6, 10.8, 7.0), 2.24-2.19 (1H, m), 1.39 (10H, app. s), 1.21-1.16 (1H, m), 1.05 (3H, d,  $J$  7.0), 1.01

(3H, d,  $J$  6.8), 0.96 (3H, t,  $J$  7.1), 0.77 (3H, d,  $J$  6.8);  $\delta_C$  (151 MHz,  $CDCl_3$ ): 158.6, 157.0, 156.7, 155.9, 150.8, 148.0, 135.5, 134.8, 132.3, 131.8, 124.3, 96.6, 59.3, 53.8, 53.7, 42.9, 40.3, 35.0, 32.4, 27.6, 25.7, 17.9, 14.9, 11.9, 11.6; HRMS (ESI+): found 626.2164;  $C_{27}H_{37}N_7O_6SK$ ,  $[M+K]^+$  requires 626.2163;  $\nu_{max}$  (thin film): 2959.5, 2877.5, 1710.8, 1580.4, 1543.1, 1464.8, 1435.0, 1360.5, 1274.7, 1215.1, 1170.4, 1114.5, 1073.0, 984.0, 875.9, 760.4, 730.6  $cm^{-1}$ ;  $[\alpha]_D^{20} +110.0$  ( $c = 0.7$ ,  $CHCl_3$ ).

**(S)-4-((S)-sec-butyl)-1-(tert-butyl)-3-(6-((S)-4-isopropyl-2-oxoimidazolidin-1-yl)pyrimidin-4-yl)imidazolidin-2-one (S33)**

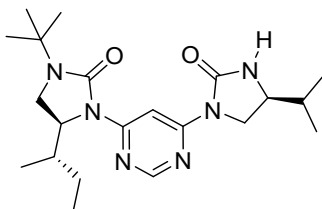

Prepared according to **General Procedure A** using di-protected dimer **S32** (0.58 g, 0.99 mmol), thiophenol (140  $\mu L$ , 1.48 mmol),  $K_2CO_3$  (0.41 g, 2.97 mmol) and  $N,N$ -DMF (10 mL). Reaction time = 4 h. Purification by flash column chromatography (silica gel, petrol:ethyl acetate 7:1  $\rightarrow$  4:1  $\rightarrow$  2:1 (product)) afforded **S33** (0.32 g, 80%) as a pale yellow crystalline solid.  $\delta_H$  (600 MHz,  $CDCl_3$ ): 8.98 (1H, s), 8.50 (1H, s), 5.31 (1H, br. s, N-H), 4.60-4.58 (1H, m), 4.13 (1H, app. t,  $J$  10.0), 3.77 (1H, dd,  $J$  10.5, 6.8), 3.50 (1H, app. q,  $J$  14.7, 7.2), 3.43 (1H, app. t,  $J$  9.3), 3.27 (1H, dd,  $J$  8.5, 2.3), 2.27-2.21 (1H, m), 1.73 (1H, app. oct,  $J$  33.0, 27.1, 20.0, 13.6, 6.8), 1.41 (9H, s), 1.40-1.35 (1H, m), 1.21-1.16 (1H, m), 0.98 (6H, d,  $J$  7.4), 0.95 (3H, d,  $J$  7.0), 0.79 (3H, d,  $J$  6.8);  $\delta_C$  (151 MHz,  $CDCl_3$ ): 158.3, 158.1, 157.6, 156.9, 156.1, 96.2, 54.8, 53.9, 47.6, 40.5, 35.3, 33.3, 27.7, 25.8, 18.2, 17.8, 12.0, 11.8; HRMS (ESI+): found 403.2805;  $C_{21}H_{35}N_6O_2$ ,  $[M+H]^+$  requires 403.2821;  $\nu_{max}$  (thin film): 3339.7, 2963.2, 2929.7, 2873.8, 1729.5, 1576.7, 1535.7, 1442.5, 139.4, 1364.2, 1323.2, 1237.5, 1077.2, 1047.4, 972.8, 875.9, 846.1, 805.1, 756.6  $cm^{-1}$ ;  $[\alpha]_D^{20} +49.8$  ( $c = 1.5$ ,  $CHCl_3$ ).

**(S)-4-((S)-sec-butyl)-1-(tert-butyl)-3-(6-((S)-3-(6-chloropyrimidin-4-yl)-4-isopropyl-2-oxoimidazolidin-1-yl)pyrimidin-4-yl)imidazolidin-2-one (2e)**

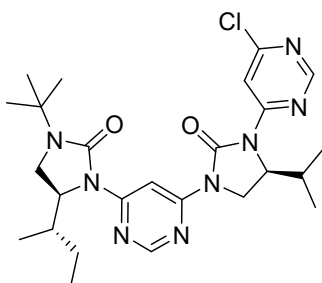

Prepared according to **General Procedure B** using  $N$ -nosyl deprotected dimer **S33** (0.32 g, 0.79 mmol), 4,6-dichloropyrimidine (0.82 g, 5.53 mmol),  $Pd_2(dba)_3$  (40 mg, 40  $\mu mol$ ), Xantphos (70 mg, 0.12 mmol), toluene (10 mL), and  $Cs_2CO_3$  (0.64 g, 1.98 mmol). Reaction time = 16 h. Purification by flash column chromatography (silica gel, petrol:ethyl acetate, 10:1  $\rightarrow$  5:1) afforded the chloropyrimidine **2e** (0.33 g, 82%) as a yellow crystalline solid.  $\delta_H$  (600 MHz,  $CDCl_3$ ): 9.16 (1H, s), 8.65 (1H, s), 8.56 (2H, s), 4.74 (1H, dt,  $J$  9.1, 2.7), 4.62 (1H, dt,  $J$  9.3, 3.0), 4.10 (1H, dd,  $J$  11.2, 2.3), 3.95 (1H, app. t,  $J$  10.2), 3.46 (1H, app. t,  $J$  9.4), 3.31 (1H, dd,  $J$  9.2, 2.3), 2.57-2.54 (1H, m), 2.30-2.25 (1H, m), 1.44 (9H, s), 1.41-1.37 (1H, m), 1.23-1.21 (1H, m), 1.01 (3H, d,  $J$  7.0), 0.99 (3H, app. t,  $J$  7.4), 0.81 (3H, d,  $J$  6.8), 0.77 (3H, d,  $J$  6.8);  $\delta_C$  (151 MHz,  $CDCl_3$ ): 161.5, 158.7, 158.4, 157.8, 157.1, 157.1, 156.1, 153.3, 109.9, 96.6, 55.6, 54.0, 53.9, 41.4, 40.5, 35.2, 28.3, 27.8, 25.8, 18.2, 14.1, 12.1, 11.8; HRMS (ESI+): found 553.2205;  $C_{25}H_{35}N_8O_2ClK$ ,  $[M+K]^+$  requires 553.2209;  $\nu_{max}$  (thin film): 2959.5, 2873.8, 1714.6, 1565.5, 1531.9, 1461.1, 1435.0, 1386.6, 1274.7, 1241.2, 1200.2, 1110.7, 984.0, 875.9, 812.6, 764.1, 678.4  $cm^{-1}$ ;  $[\alpha]_D^{20} +10.7$  ( $c = 2.1$ ,  $CHCl_3$ ).

**(S)-4-((S)-sec-butyl)-1-(tert-butyl)-3-(6-((S)-4-isopropyl-3-(6-((S)-4-methyl-3-((2-nitrophenyl)sulfonyl)-2-oxoimidazolidin-1-yl)pyrimidin-4-yl)-2-oxoimidazolidin-1-yl)pyrimidin-4-yl)imidazolidin-2-one (S34)**

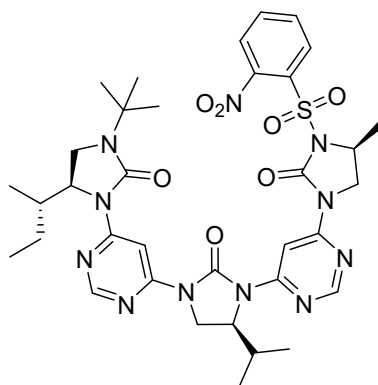

Prepared according to **General Procedure B** using chloropyrimidine **2e** (0.33 g, 0.65 mmol), imidazolidin-2-one **7** (0.28 g, 0.97 mmol) [added in 2 portions at reaction time = 0 h and at 1 h], Pd<sub>2</sub>(dba)<sub>3</sub> (30 mg, 30 μmol), Xantphos (60 mg, 0.10 mol), toluene (10 mL), and K<sub>2</sub>CO<sub>3</sub> (0.22 g, 1.63 mmol). Reaction time = 16 h. Purification by flash column chromatography (silica gel, dichloromethane → dichloromethane:ethyl acetate 6:1) afforded the di-protected trimer **S34** (0.47 g, 95 %) as a pale yellow solid. δ<sub>H</sub> (600 MHz, CDCl<sub>3</sub>): 9.04 (1H, s), 8.88 (1H, s), 8.58 (1H, s), 8.55-8.54 (2H, m), 7.79 (1H, t, *J* 7.3), 7.75-7.71 (2H, m), 4.72 (1H, dt, *J* 9.2, 6.0), 4.68-4.66 (1H, m), 4.61 (1H, dt, *J* 9.4, 2.8), 4.26 (1H, t, *J* 9.7), 4.02 (1H, dd, *J* 11.1, 2.0), 3.90 (1H, t, *J* 10.0), 3.86 (1H, dd, *J* 10.6, 1.9), 3.46 (1H, t, *J* 9.3), 3.31 (1H, dd, 8.9, 2.2), 2.54-2.49 (1H, m), 2.31-2.24 (1H, m), 1.65 (3H, d, *J* 6.3), 1.46 (9H, s), 1.41-1.36 (1H, m), 1.23-1.18 (1H, m), 0.99 (6H, app. t, *J* 6.7), 0.82 (3H, d, *J* 6.8), 0.75 (3H, d, *J* 6.8); δ<sub>C</sub> (151 MHz, CDCl<sub>3</sub>): 158.6, 158.1, 157.7, 157.4, 157.1, 157.0, 156.0, 153.2, 150.4, 148.0, 135.5, 135.0, 132.4, 131.5, 124.3, 98.4, 97.0, 55.6, 54.0, 53.9, 51.1, 49.4, 41.3, 40.5, 35.2, 28.4, 27.8, 25.8, 22.9, 18.1, 14.2, 12.1, 11.8; HRMS (ESI<sup>+</sup>): found 802.2885; C<sub>35</sub>H<sub>45</sub>N<sub>11</sub>O<sub>7</sub>SK, [M+K]<sup>+</sup> requires 802.2861; ν<sub>max</sub> (thin film): 2992.2, 2851.4, 1733.2, 1580.4, 1539.4, 1446.2, 1367.9, 1278.5, 1215.1, 1174.1, 1110.7, 875.9, 749.2 cm<sup>-1</sup>; [α]<sub>D</sub><sup>20</sup> +5.5 (*c* = 2.1, CHCl<sub>3</sub>).

**(S)-4-((S)-sec-butyl)-1-(tert-butyl)-3-(6-((S)-4-isopropyl-3-(6-((S)-4-methyl-2-oxoimidazolidin-1-yl)pyrimidin-4-yl)-2-oxoimidazolidin-1-yl)pyrimidin-4-yl)imidazolidin-2-one (S35)**

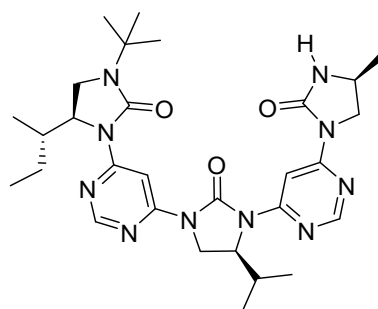

Prepared according to **General Procedure A** using di-protected trimer **S34** (0.47 g, 0.62 mmol), thiophenol (90 μL, 0.93 mmol), K<sub>2</sub>CO<sub>3</sub> (0.26 g, 1.86 mmol) and *N,N*-DMF (10 mL). Reaction time = 20 h. Purification by flash column chromatography (silica gel, dichloromethane → 1% methanol:dichloromethane) afforded **S35** (41 g, 52 %) as a pale yellow crystalline solid. δ<sub>H</sub> (600 MHz, CDCl<sub>3</sub>): 9.09 (1H, s), 9.01 (1H, s), 8.54 (1H, s), 8.53 (1H, s), 6.18 (1H, br. s), 4.76 (1H, dt, *J* 9.0, 2.9), 4.59 (1H, dt, *J* 9.3, 2.8), 4.22 (1H, dd, *J* 10.5, 8.7), 4.03 (1H, dd, *J* 11.0, 3.5), 4.0-3.9 (2H, m), 3.69 (1H, dd, *J* 10.1, 6.6), 3.43 (1H, t, *J* 9.3), 3.28 (1H, dd, *J* 8.5, 1.6), 2.54-2.49 (1H, m), 2.28-2.23 (1H, m), 1.40 (10H, app. s), 1.36 (3H, d, *J* 5.8), 1.22-1.17 (1H, m), 0.99-0.96 (6H, m), 0.79 (3H, d, *J* 6.8), 0.77 (3H, d, *J* 6.8); δ<sub>C</sub> (151 MHz, CDCl<sub>3</sub>): 158.8, 158.6, 157.6, 157.6, 157.2, 156.9, 156.9, 155.9, 153.3, 97.8, 97.1, 55.4, 54.0, 53.9, 51.2, 44.8, 41.3, 40.5, 35.2, 28.5, 27.7, 25.9, 21.9, 18.2, 14.3, 12.1, 11.8; HRMS (ESI<sup>+</sup>): found 617.3064; C<sub>29</sub>H<sub>42</sub>N<sub>10</sub>O<sub>3</sub>K, [M+K]<sup>+</sup> requires 617.3078; ν<sub>max</sub> (thin film): 3321.1, 2959.5, 2922.2, 2873.8, 2359.4, 1718.3, 1576.7, 1446.2, 1378.1, 1274.7, 1237.5, 1274.7, 1110.7, 1073.5, 879.7, 756.6, 670.9 cm<sup>-1</sup>; [α]<sub>D</sub><sup>20</sup> +63.7 (*c* = 0.6, CHCl<sub>3</sub>).

**(S)-4-((S)-sec-butyl)-1-(tert-butyl)-3-(6-((S)-3-(6-chloropyrimidin-4-yl)-4-methyl-2-oxoimidazolidin-1-yl)pyrimidin-4-yl)-4-isopropyl-2-oxoimidazolidin-1-yl)pyrimidin-4-yl)imidazolidin-2-one (S36)**

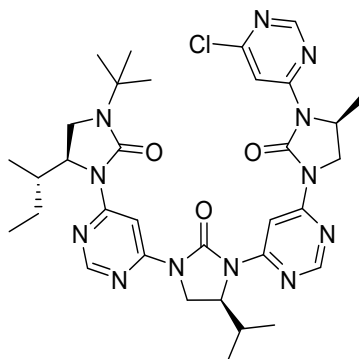

Prepared according to **General Procedure B** using *N*-nosyl deprotected trimer **S35** (0.26 g, 0.46 mol), 4,6-dichloropyrimidine (0.61 g, 4.11 mmol), Pd<sub>2</sub>(dba)<sub>3</sub> (21 mg, 23 μmol), Xantphos (40 mg, 70 μmol), toluene (5 mL), and K<sub>2</sub>CO<sub>3</sub> (0.16 g, 1.14 mmol). Reaction time = 16 h. After 16 h the reaction had not reached completion, a second portion of Pd<sub>2</sub>(dba)<sub>3</sub> (10 mg, 12 μmol) and Xantphos (20 mg, 35 μmol) was added. Reaction time = 7 h. Purification by flash column chromatography (silica gel, petrol:ethyl acetate, 10:1 → 5:1 → 1:1) afforded the chloropyrimidine **S36** (0.28 g, 90%) as a pale yellow crystalline solid. δ<sub>H</sub> (600 MHz, CDCl<sub>3</sub>): 9.17 (1H, d, 1.0), 9.09 (1H, d, *J* 0.9), 8.67 (1H, d, *J* 0.8), 8.62 (1H, d, *J* 1.0), 8.56 (1H, d, *J* 0.9), 8.49 (1H, d, 0.8), 4.86 (1H, pent. d, *J* 27.6, 21.3, 15.2, 12.5, 6.1, 3.0), 4.77 (1H, dt, *J* 9.5, 3.4), 4.60 (1H, dt, *J* 9.6, 3.2), 4.18 (1H, dd, *J* 10.6, 9.0), 4.07 (1H, dd, *J* 10.9, 3.2), 4.00 (1H, dd, *J* 10.7, 9.5), 3.93 (1H, dd, *J* 10.6, 2.8), 3.45 (1H, t, *J* 9.2), 3.30 (1H, dd, *J* 9.1, 3.2), 2.60-2.53 (1H, m), 2.32-2.25 (1H, m), 1.50 (3H, d, *J* 6.3), 1.43 (9H, s), 1.22-1.19 (1H, m), 1.02 (3H, d, *J* 7.0), 0.99 (3H, t, *J* 7.5), 0.80 (6H, t, *J* 7.1); δ<sub>C</sub> (151 MHz, CDCl<sub>3</sub>): 161.4, 158.7, 158.2, 158.1, 158.0, 157.8, 157.4, 157.1, 156.9, 155.9, 153.3, 152.6, 109.8, 98.2, 97.2, 55.6, 54.0, 54.0, 48.3, 48.0, 41.4, 40.5, 35.2, 28.5, 27.7, 25.8, 20.2, 18.2, 14.2, 12.1, 11.8; HRMS (ESI<sup>+</sup>): found 729.2830; C<sub>33</sub>H<sub>43</sub>N<sub>12</sub>O<sub>3</sub>ClK, [M+K]<sup>+</sup> requires 729.2907; ν<sub>max</sub> (thin film): 2922.2, 2959.5, 1714.6, 1561.8, 1528.2, 1438.8, 1394.0, 1364.2, 1278.5, 1237.5, 1207.7, 1110.7, 984.0, 875.9, 741.7, 670.9 cm<sup>-1</sup>; [α]<sub>D</sub><sup>20</sup> +28.9 (c = 2.0, CHCl<sub>3</sub>).

**(S)-1-(6-((S)-5-((S)-sec-butyl)-2-oxoimidazolidin-1-yl)pyrimidin-4-yl)-3-(6-((S)-3-(6-chloropyrimidin-4-yl)-4-methyl-2-oxoimidazolidin-1-yl)pyrimidin-4-yl)-4-isopropylimidazolidin-2-one (4b)**

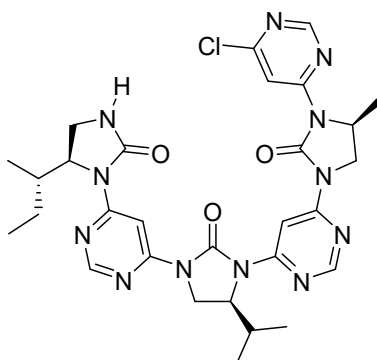

At room temperature, trifluoroacetic acid (5 mL) was added to the chloropyrimidine **S36** (37 mg, 54 μmol). The reaction mixture was stirred and trifluoromethanesulfonic acid (1 mL) was subsequently added. When TLC analysis showed all starting material had been consumed, excess trifluoroacetic acid and trifluoromethanesulfonic acid was removed by running a compressed air line over the solution for 1 h. The resulting crude brown residue was taken up in dichloromethane and washed with NaHCO<sub>3</sub>. The layers were separated, and the aqueous layer was further extracted with dichloromethane (2 x 10 mL). The combined organic extracts were dried over anhydrous magnesium sulfate, filtered, and concentrated *in vacuo*. The crude solid was used without any further purification due to the reaction size and inherent loss of mass during trituration. The *tert*-butyl deprotected trimer **4b** (34 mg, >99%) was obtained as a pale yellow crystalline solid. δ<sub>H</sub> (400 MHz, CDCl<sub>3</sub>): 9.17 (1H, s), 9.06 (1H, s), 8.66 (1H, s), 8.62 (1H, d, *J* 0.9), 8.58 (1H, s), 8.46 (1H, s), 5.36 (1H, br. s, N-H), 4.89-4.86 (1H, m), 4.83 (1H, dt, *J* 9.5, 3.4), 4.78 (1H, dt, *J* 9.4, 3.3), 4.19 (1H, dd, *J* 10.5, 9.0), 4.08 (1H, dd, *J* 11.0, 3.1), 4.0 (1H, dd, 10.8, 9.7), 3.93 (1H, dd, *J* 10.7, 2.6), 3.55 (1H, t, *J* 9.3), 3.35 (1H, dd,

$J$  9.0, 3.3), 2.59-2.53 (1H, m), 2.35-2.29 (1H, m), 1.50 (3H, d,  $J$  6.3), 1.39-1.34 (1H, m), 1.23-1.15 (1H, m), 1.01 (3H, d,  $J$  7.0), 0.97 (3H, t,  $J$  7.4), 0.84 (3H, d,  $J$  6.9), 0.79 (3H, d,  $J$  6.9);  $\delta_C$  (101 MHz,  $CDCl_3$ ): 161.6, 158.5, 158.3, 158.2, 158.1, 157.9, 157.6, 157.2, 157.1, 153.4, 152.6, 109.8, 98.1, 97.3, 58.1, 55.6, 48.3, 48.0, 41.4, 37.9, 35.2, 28.5, 25.7, 20.3, 18.2, 14.3, 12.0, 11.8; HRMS (ESI<sup>+</sup>): found 673.2280;  $C_{29}H_{35}N_{12}O_3ClK$ ,  $[M+K]^+$  requires 673.2281;  $\nu_{max}$  (thin film): 2959.5, 2922.2, 2855.1, 1729.5, 1565.5, 1531.9, 1423.8, 1367.9, 1207.7, 1110.7, 984.0, 875.9, 771.6, 741.7, 708.2  $cm^{-1}$ ;  $[\alpha]_D^{20} +6.1$  ( $c = 1.8$ ,  $CHCl_3$ ).

## 2.5 Synthesis of Macrocycles

### Macrocyclic Tetramer **3a**

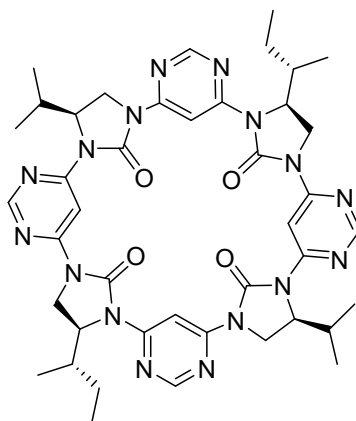

To a sealed tube equipped with a magnetic stir bar was added dimer **2a** (72 mg, 0.16 mmol), freshly recrystallized  $Pd_2(dba)_3$  (4 mg, 4  $\mu$ mol), and Xantphos (7 mg, 12  $\mu$ mol). Anhydrous toluene (10 mL) was added to the flask, and the resulting suspension was degassed by sparging with nitrogen gas for 30 min.  $Cs_2CO_3$  (60 mg, 0.20 mmol) was then added in one portion to the flask, and the reaction mixture was heated to reflux under a nitrogen atmosphere. Reaction time = 16 h. After complete consumption of the urea starting material by TLC analysis (petrol:ethyl acetate, 1:1), the reaction was cooled to room temperature, diluted with dichloromethane (20 mL) and filtered over Celite®. The crude diluted product was then washed in distilled water for 4 h to displace any  $Cs^+$  that was bound inside the macrocycle cavity. The layers were then separated and the aqueous layers extracted with dichloromethane (2 x 30 mL). The combined organic extracts were dried over anhydrous magnesium sulfate, filtered, and concentrated *in vacuo*. The crude solid was purified by trituration in hot diethyl ether to afford the macrocyclic tetramer **3a** (37 mg, 56%) as an off-white crystalline solid.  $\delta_H$  (600 MHz,  $CDCl_3$ ): 9.97 (4H, app. d,  $J$  2.4), 8.60 (4H, d,  $J$  3.9), 4.83 (2H, dt,  $J$  9.9, 3.1), 4.73 (2H, dt,  $J$  8.9, 2.6), 4.06-3.98 (8H, m), 2.68-2.62 (2H, m), 2.44-2.39 (2H, m), 1.50-1.41 (2H, m), 1.35-1.27 (2H, m), 1.01 (12H, dd,  $J$  6.8, 2.5), 0.78 (12H, dd,  $J$  12.2, 7.0);  $\delta_C$  (151 MHz,  $CDCl_3$ ): 158.2, 158.1, 157.9, 157.8, 157.2, 157.1, 153.6, 153.5, 97.9, 97.8, 55.4, 54.3, 40.8, 40.7, 35.2, 28.5, 25.7, 18.2, 14.0, 12.0, 11.4; HRMS (ESI<sup>+</sup>): found 883.3961;  $C_{42}H_{52}N_{16}O_4K$ ,  $[M+K]^+$  requires 883.3995;  $\nu_{max}$  (thin film): 3190.6, 2959.5, 2873.8, 1729.5, 1580.4, 1476.0, 1423.8, 1364.2, 1259.8, 1215.1, 1114.5, 987.7, 902.0, 723.1, 682.1  $cm^{-1}$ ;  $[\alpha]_D^{20} +6.5$  ( $c = 0.2$ ,  $CHCl_3$ ). Diffraction-quality crystals were grown by the vapour diffusion method ( $CHCl_3/MeOH$ ).

## Macrocyclic Tetramer **3b**

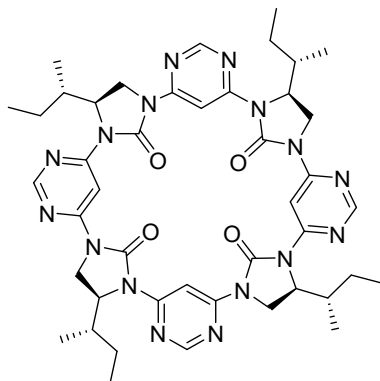

To a sealed tube equipped with a magnetic stir bar was added dimer **2b** (50 mg, 0.11 mmol), freshly recrystallized Pd<sub>2</sub>(dba)<sub>3</sub> (5 mg, 5 μmol), and Xantphos (9 mg, 16 μmol). Anhydrous toluene (5 mL) was added to the flask, and the resulting suspension was degassed by sparging with nitrogen gas for 30 min. K<sub>2</sub>CO<sub>3</sub> (40 mg, 0.27 mmol) was then added in one portion to the flask, and the reaction mixture was heated to reflux under a nitrogen atmosphere. Reaction time = 16 h. After complete consumption of the urea starting material by TLC analysis (petrol:ethyl acetate, 1:1), the reaction was cooled to room temperature, diluted with dichloromethane (20 mL) and filtered over Celite®. The crude diluted product was then washed in distilled water for 4 h to displace any Cs<sup>+</sup> that was bound inside the macrocycle cavity. The layers were then separated and the aqueous layers extracted with dichloromethane (2 x 30 mL). The combined organic extracts were dried over anhydrous magnesium sulfate, filtered, and concentrated *in vacuo*. The crude solid was purified by trituration in hot diethyl ether to afford the macrocyclic tetramer **3b** (28.4 mg, 61%) as an off-white crystalline solid.  $\delta_H$  (600 MHz, CDCl<sub>3</sub>): 9.97 (4H, s, H3), 8.61 (4H, s, H1), 4.84 (4H, dt, *J* 9.1, 3.0, H7), 4.03 (4H, dd, *J* 10.8, 2.7, H6), 3.98 (4H, t, *J* 10.0, H6'), 2.45-2.38 (4H, m, H8), 1.48 (4H, ddq, *J* 13.5, 7.3, 6.9, H9), 1.36-1.28 (4H, m, H9'), 1.02 (12H, t, *J* 7.4, H10), 0.78 (12H, d, *J* 6.9, H11);  $\delta_C$  (151 MHz, CDCl<sub>3</sub>): 158.0, 157.7, 157.0 (C1), 153.5, 97.8 (C3), 54.2 (C7), 40.7 (C6), 35.0 (C8), 25.5 (C9), 11.9 (C10), 11.3 (C11); HRMS (ESI<sup>+</sup>): found 911.4267; C<sub>44</sub>H<sub>56</sub>N<sub>16</sub>O<sub>4</sub>K, [M+K]<sup>+</sup> requires 911.4308;  $\nu_{max}$  (thin film): 3183.1, 2963.2, 1736.9, 1584.1, 1431.3, 1394.0, 1263.6, 1222.6, 987.7, 887.1, 752.9, 685.8 cm<sup>-1</sup>;  $[\alpha]_D^{20} +16.5$  (*c* = 0.3, CHCl<sub>3</sub>). **Note:** The <sup>1</sup>H NMR spectrum of **3b** indicated the presence of a second, C<sub>n</sub>-symmetrical species (Figure S1) in a ~6:1 ratio relative to the major compound. For example, two pyrimidine peaks at 9.44 and 8.78 ppm were observed, and the fact only two peaks were observed is indicative of a symmetrical molecule (as opposed to residual starting material or open-chain oligomers, which would lack this symmetry).

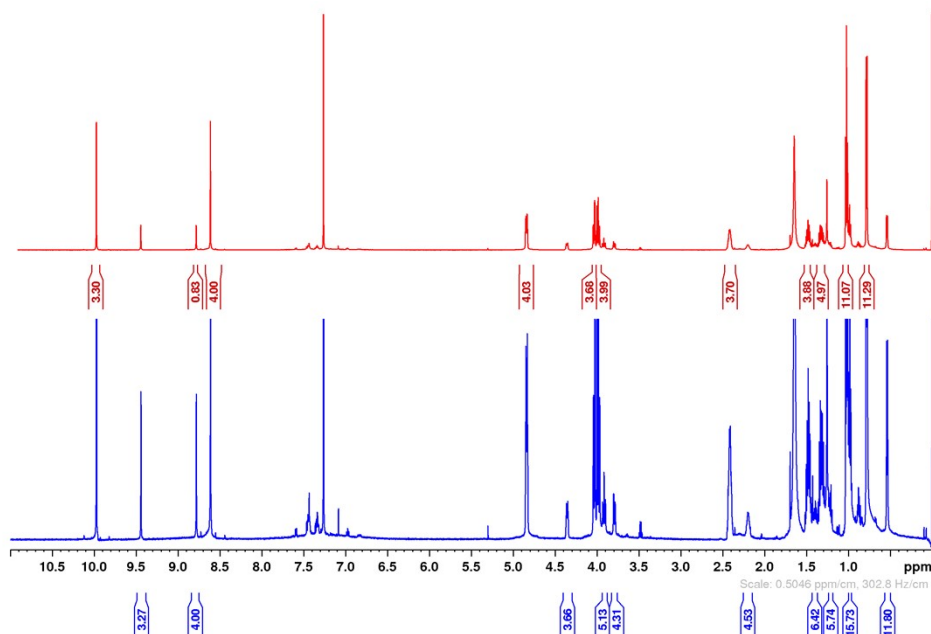

**Figure S1.** The spectrum of **3b** (600 MHz, CDCl<sub>3</sub>) with major (top) and minor (bottom) resonances integrated.

NOESY analysis of the mixture showed in-phase cross-peaks between equivalent  $^1\text{H}$  resonances in the major and minor components, indicating that these molecules undergo *chemical* exchange on the timescale of the NOESY experiment (Figure S2 below).

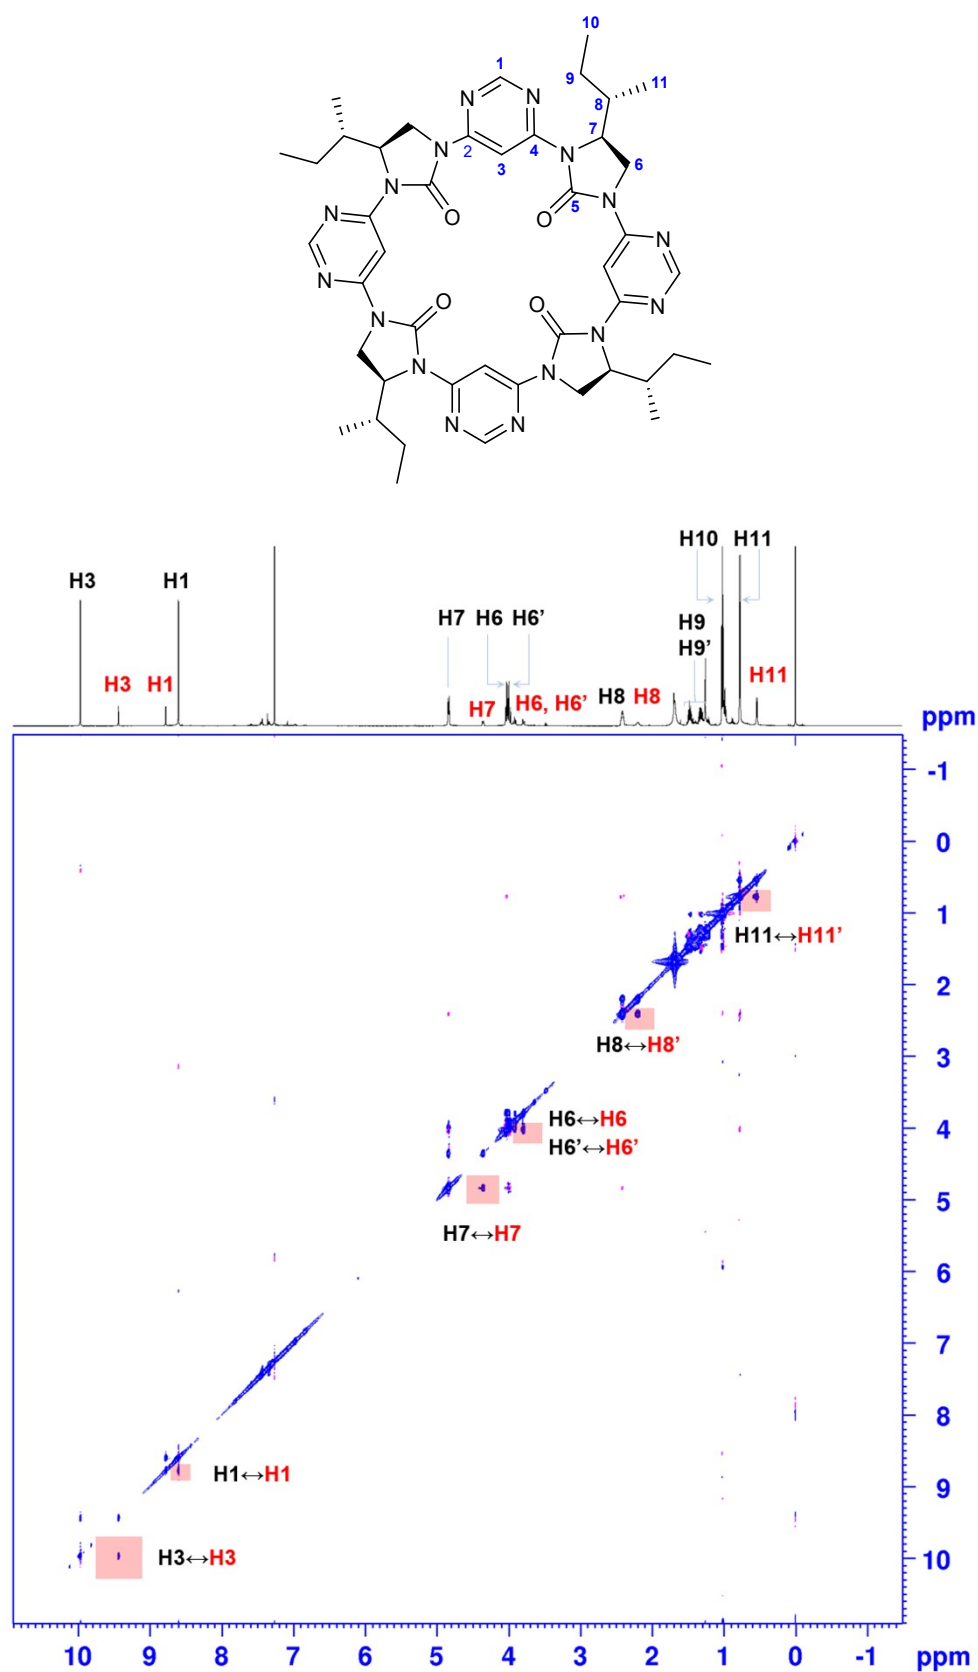

**Figure S2.** NOESY spectrum of **3b** (600 MHz,  $\text{CDCl}_3$ ,  $t_{\text{mix}}$  0.30 s). Structural assignments for peaks corresponding to the major (black) and minor (red) components are labelled on the 1D projection. Cross-peaks indicating chemical exchange processes are highlighted.



The observed chemical exchange may be due to the molecule populating two low energy interconverting conformers, or due to a reversible binding interaction between the macrocycle and an unknown guest. To rule out the latter, the macrocycle was placed in a much more competitive (Lewis basic) NMR solvent –  $d_5$ -pyridine. If an unknown guest were bound, it would be expected that the ratio of unoccupied:occupied macrocycle would increase. However, the minor component was still present in the same proportion when the  $^1\text{H}$  NMR spectrum was acquired in a more competitive  $d_5$ -pyridine NMR solvent (Figure S3).

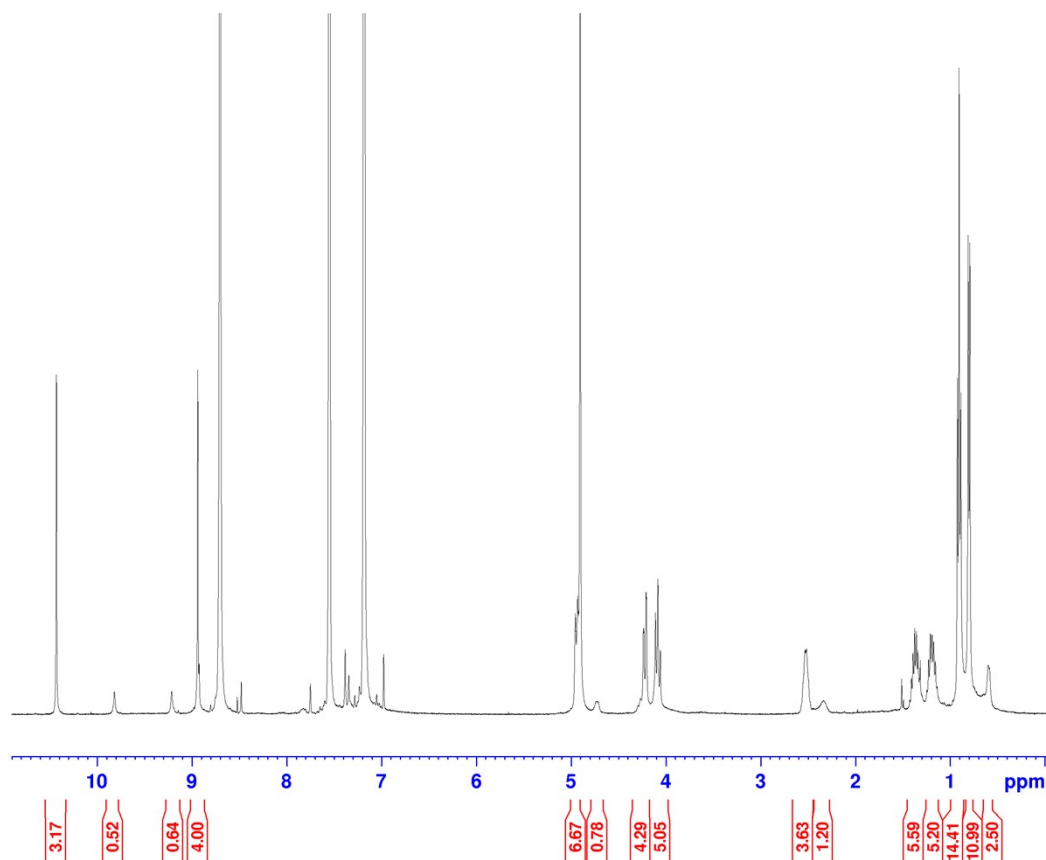

**Figure S3.**  $^1\text{H}$  NMR spectrum of **3b** in  $d_5$ -pyridine (400 MHz).

In combination with the NOESY experiment, these data are consistent with the presence of two low energy conformations of the macrocycle.

### Macrocyclic Tetramer **3c**

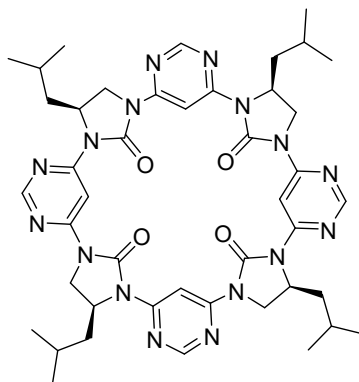

To a sealed tube equipped with a magnetic stir bar was added dimer **2c** (0.56 g, 1.18 mmol), freshly recrystallized  $\text{Pd}_2(\text{dba})_3$  (30 mg, 30  $\mu\text{mol}$ ), and Xantphos (50 mg, 90  $\mu\text{mol}$ ). Anhydrous toluene (59 mL) was added to the flask, and the resulting suspension was degassed by sparging with nitrogen gas for 30 min.  $\text{Cs}_2\text{CO}_3$  (0.48 g, 1.48 mmol) was then added in one portion to the flask, and the reaction mixture was heated to reflux under a nitrogen atmosphere. Reaction

time = 16 h. After complete consumption of the urea starting material by TLC analysis (petrol:ethyl acetate, 1:1), the reaction was cooled to room temperature, diluted with dichloromethane (20 mL) and filtered over Celite®. The crude diluted product was then washed in distilled water for 4 h to displace any Cs<sup>+</sup> that was bound inside the macrocycle cavity. The layers were then separated and the aqueous layers extracted with dichloromethane (2 x 30 mL). The combined organic extracts were dried over anhydrous magnesium sulfate, filtered, and concentrated *in vacuo*. The crude solid was purified by trituration in hot diethyl ether to afford the macrocyclic tetramer **3c** (0.38 g, 74%) as an off-white crystalline solid.  $\delta_H$  (600 MHz, CDCl<sub>3</sub>): 9.89 (4H, d, *J* 0.8), 8.60 (4H, d, *J* 0.7), 4.81-4.78 (4H, m), 4.11 (4H, app. t, *J* 10.0), 4.01 (4H, dd, *J* 10.4, 2.2), 1.93-1.89 (4H, m), 1.82-1.75 (4H, m), 1.53-1.48 (4H, m), 1.05 (12H, d, *J* 6.5), 0.97 (12H, d, *J* 6.6);  $\delta_C$  (151 MHz, CDCl<sub>3</sub>): 158.4, 157.8, 157.2, 153.3, 97.9, 50.1, 45.9, 42.4, 25.0, 23.9, 21.8; HRMS (ESI<sup>+</sup>): found 890.5020; C<sub>44</sub>H<sub>60</sub>N<sub>17</sub>O<sub>4</sub>, [M+NH<sub>4</sub>]<sup>+</sup> requires 890.50147;  $\nu_{max}$  (thin film): 2959.5, 2873.8, 1736.9, 1580.4, 1423.8, 1386.6, 1259.8, 1218.8, 1110.7, 987.7, 771.6, 670.9 cm<sup>-1</sup>;  $[\alpha]_D^{20}$  +3.2 (*c* = 0.7, CHCl<sub>3</sub>).

### Macrocyclic Tetramer **3d**

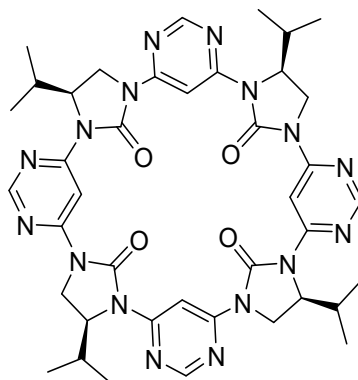

To a sealed tube equipped with a magnetic stir bar was added dimer **2d** (0.12 g, 0.26 mmol), freshly recrystallized Pd<sub>2</sub>(dba)<sub>3</sub> (6 mg, 6 μmol), and Xantphos (11 mg, 20 μmol). Anhydrous toluene (13 mL) was added to the flask, and the resulting suspension was degassed by sparging with nitrogen gas for 15-30 min. Cs<sub>2</sub>CO<sub>3</sub> (0.11 g, 0.33 mmol) was then added in one portion to the flask, and the reaction mixture was heated to reflux under a nitrogen atmosphere. Reaction time = 16 h. After complete consumption of the urea starting material by TLC analysis (petrol:ethyl acetate, 1:1), the reaction was cooled to room temperature, diluted with dichloromethane (20 mL) and filtered over Celite®. The crude diluted product was then washed in distilled water for 4 h to displace any Cs<sup>+</sup> that was bound inside the macrocycle cavity. The layers were then separated and the aqueous layers extracted with dichloromethane (2 x 20 mL). The combined organic extracts were dried over anhydrous magnesium sulfate, filtered, and concentrated *in vacuo*. The crude solid was purified by trituration in hot diethyl ether to afford the macrocyclic tetramer **3d** (91 mg, 85%) as an off-white crystalline solid.  $\delta_H$  (600 MHz, CDCl<sub>3</sub>): 9.98 (4H, s), 8.62 (4H, s), 4.74 (4H, dt, *J* 9.5, 3.0), 4.06 (4H, dd, *J* 10.9, 2.5), 3.97 (4H, app. t, *J* 10.2), 2.68-2.63 (4H, m), 1.04 (12H, d, *J* 7.0), 0.81 (12H, d, *J* 6.9);  $\delta_C$  (151 MHz, CDCl<sub>3</sub>): 158.2, 157.9, 157.2, 153.6, 97.9, 55.4, 40.7, 28.5, 18.2, 14.1; HRMS (ESI<sup>+</sup>): found 855.3653 C<sub>40</sub>H<sub>48</sub>N<sub>16</sub>O<sub>4</sub>K, [M+K]<sup>+</sup> requires 855.3682;  $\nu_{max}$  (thin film): 3183.1, 2959.5, 2873.8, 1729.5, 1580.4, 1423.8, 1386.6, 1282.2, 1259.8, 1218.8, 1114.5, 987.7, 730.6, 685.8 cm<sup>-1</sup>;  $[\alpha]_D^{20}$  +33.6 (*c* = 0.28, CHCl<sub>3</sub>).

## Macrocyclic Trimer 5a

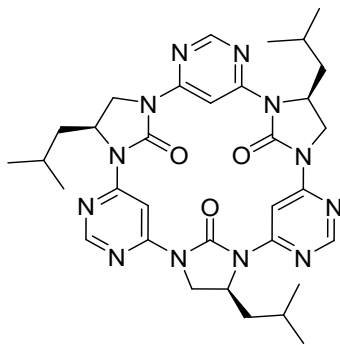

To a sealed tube equipped with a magnetic stir bar was added trimer **4a** (60 mg, 0.09 mmol), freshly recrystallized Pd<sub>2</sub>(dba)<sub>3</sub> (4 mg, 3 μmol), and Xantphos (6 mg, 10 μmol). Anhydrous toluene (21 mL) was added to the flask, and the resulting suspension was degassed by sparging with nitrogen gas for 30 min. K<sub>2</sub>CO<sub>3</sub> (22 mg, 0.16 mmol) was then added in one portion to the flask, and the reaction mixture was heated to reflux under a nitrogen atmosphere. Reaction time = 16 h. After complete consumption of the urea starting material by TLC analysis (petrol:ethyl acetate, 1:1), the reaction was cooled to room temperature, diluted with dichloromethane (20 mL) and filtered over Celite®. The crude diluted product was then washed in distilled water for 4 h to displace any Cs<sup>+</sup> that was bound inside the macrocycle cavity. The layers were then separated and the aqueous layers extracted with dichloromethane (2 x 30 mL). The combined organic extracts were dried over anhydrous magnesium sulfate, filtered, and concentrated *in vacuo*. Purification by flash column chromatography (silica gel, 1% methanol:dichloromethane) to afford the macrocyclic trimer **5a** (3.5 mg, 6%) as an off-white crystalline solid. δ<sub>H</sub> (600 MHz, CDCl<sub>3</sub>): 8.69 (3H, d, *J* 1.0), 8.50 (3H, d, *J* 0.9), 4.71-4.67 (3H, m), 4.18 (3H, app. dd, *J* 10.4, 8.8), 3.91 (3H, dd, *J* 10.6, 5.7), 1.91-1.87 (3H, m), 1.78-1.71 (3H, m), 1.01 (9H, d, *J* 6.6), 0.95 (9H, d, *J* 6.7); δ<sub>C</sub> (151 MHz, CDCl<sub>3</sub>): 158.6, 158.0, 157.4, 153.3, 101.3, 51.3, 47.1, 42.1, 24.9, 23.9, 21.8; HRMS (ESI<sup>+</sup>): found 655.3581; C<sub>33</sub>H<sub>43</sub>N<sub>12</sub>O<sub>3</sub>, [M+H]<sup>+</sup> requires 665.3576; *v*<sub>max</sub> (thin film): 2955.8, 2929.7, 2870.1, 1736.9, 1576.7, 1435.0, 1364.2, 1241.2, 1211.4, 987.7, 749.2, 682.1 cm<sup>-1</sup>; [α]<sub>D</sub><sup>20</sup> +23.7 (*c* = 0.4, CHCl<sub>3</sub>).

## Macrocyclic Trimer 5b

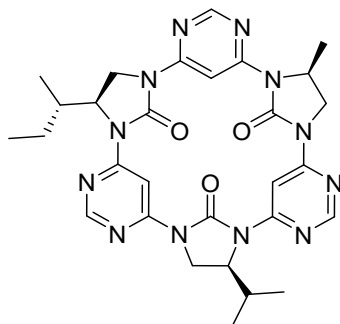

To a sealed tube equipped with a magnetic stir bar was added trimer **4b** (40 mg, 63 μmol), freshly recrystallized Pd<sub>2</sub>(dba)<sub>3</sub> (3 mg, 3 μmol), and Xantphos (6 mg, 10 μmol). Anhydrous toluene (21 mL) was added to the flask, and the resulting suspension was degassed by sparging with nitrogen gas for 30 min. Cs<sub>2</sub>CO<sub>3</sub> (50 mg, 0.16 mmol) was then added in one portion to the flask, and the reaction mixture was heated to reflux under a nitrogen atmosphere. Reaction time = 16 h. After complete consumption of the urea starting material by TLC analysis (ethyl acetate), the reaction was cooled to room temperature, diluted with dichloromethane (20 mL) and filtered over Celite®. The crude diluted product was then washed in distilled water for 4 h to displace any Cs<sup>+</sup> that was bound inside the macrocycle cavity. The layers were then separated and the aqueous layers extracted with dichloromethane (2 x 30 mL). The combined organic extracts were dried over anhydrous magnesium sulfate, filtered, and concentrated *in vacuo*. Purification by flash column chromatography (silica gel, 5% methanol:dichloromethane) to afford the macrocyclic trimer **5b** (11 mg, 29%) as an off-white crystalline solid. δ<sub>H</sub> (400 MHz, CDCl<sub>3</sub>): 8.72-8.71 (3H, m), 8.66 (1H, d, *J* 1.1), 8.49 (1H, d, *J* 1.1), 8.44 (1H, d, *J* 1.0), 4.81-4.76 (1H, m), 4.69-4.64 (2H, m), 4.20 (1H, app. dd, *J* 10.4, 8.6), 4.04-3.94 (4H, m), 3.83 (1H, dd, *J* 10.7, 7.2), 2.44-2.34 (1H, m), 2.24-2.17 (1H, m), 1.47-1.42 (4H, m), 1.30-1.21 (3H, m), 0.98 (6H, app. t, *J* 7.0), 0.79 (6H, app. dd,

*J* 6.9, 2.0);  $\delta_c$  (151 MHz, CDCl<sub>3</sub>): 158.5, 158.40, 158.38, 157.8, 157.7, 157.6, 157.41, 157.39, 157.3, 153.7, 153.5, 153.1, 101.8, 101.5, 101.3, 56.0, 55.0, 48.7, 48.5, 41.4, 41.3, 34.5, 27.5, 25.3, 19.2, 17.7, 14.0, 11.9, 11.5; HRMS (ESI+): found 599.2960; C<sub>33</sub>H<sub>43</sub>N<sub>12</sub>O<sub>3</sub>, [M+H]<sup>+</sup> requires 599.2950;  $\nu_{max}$  (thin film): 2959.5, 2877.5, 1736.9, 1576.7, 1435.0, 1248.7, 987.7, 872.2, 730.6, 685.8 cm<sup>-1</sup>;  $[\alpha]_D^{20}$  +25.4 (*c* = 0.5, CHCl<sub>3</sub>).

## 3 NMR Titration

### 3.1 Hexadecylammonium Chloride Binding

#### 3.1.1 Host and Guest Solution Preparation

Macrocycle **3d** (2.30 mg, 2.8  $\mu\text{mol}$ ) was weighed accurately into a gas chromatography vial which was then fitted with a screw-top lid featuring a rubber septum to prevent evaporation of solvent. Deuterated chloroform (1.07 mL) was then added to the vial and sonicated briefly to ensure the macrocycle had been fully dissolved. The solution was split into two parts, the host solution (0.66 mL) which was transferred using a micro syringe into an NMR tube leaving the guest solution (0.41 mL) in the sealed gas chromatography vial. Hexadecyltrimethylammonium chloride (11.5 mg, 31.6  $\mu\text{mol}$ ) was added to the guest solution and sonicated.

#### 3.1.2 NMR Titrations

An NMR of the free host solution was carried out to obtain a reference spectrum. The guest solution (2  $\mu\text{L}$ ) was then added to the NMR tube and a second spectrum obtained. This process was repeated according to the Table S1 below to acquire a range of data points. All spectra were referenced to tetramethylsilane and the chemical shifts of the two pyrimidine C-H residues were measured.

**Table S1:** NMR Guest Titration Values

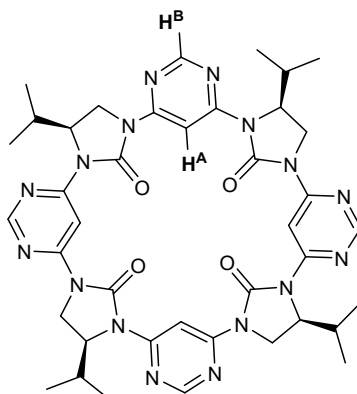

| Vol Guest (mL) | Conc. Guest (M) | $\delta(\text{H}^{\text{A}})$ / ppm | $\delta(\text{H}^{\text{B}})$ / ppm |
|----------------|-----------------|-------------------------------------|-------------------------------------|
| 0.002          | 0.0002335       | 10.00185                            | 8.63103                             |
| 0.004          | 0.00046559      | 9.99813                             | 8.63223                             |
| 0.006          | 0.0006963       | 9.99462                             | 8.6347                              |
| 0.008          | 0.00092562      | 9.99027                             | 8.63574                             |
| 0.01           | 0.00115359      | 9.98596                             | 8.63671                             |
| 0.012          | 0.0013802       | 9.98153                             | 8.63641                             |
| 0.014          | 0.00160547      | 9.97726                             | 8.63606                             |
| 0.016          | 0.00182942      | 9.97512                             | 8.63794                             |
| 0.018          | 0.00205205      | 9.9739                              | 8.63971                             |
| 0.02           | 0.00227337      | 9.97018                             | 8.63917                             |
| 0.022          | 0.0024934       | 9.96773                             | 8.64006                             |
| 0.024          | 0.00271215      | 9.96449                             | 8.63939                             |
| 0.03           | 0.0033608       | 9.96243                             | 8.63977                             |
| 0.04           | 0.00441727      | 9.9567                              | 8.64143                             |
| 0.06           | 0.00644247      | 9.94844                             | 8.64234                             |
| 0.08           | 0.00835855      | 9.93626                             | 8.64421                             |
| 0.1            | 0.0101741       | 9.92784                             | 8.64647                             |
| 0.2            | 0.01798872      | 9.91795                             | 8.64493                             |
| 0.3            | 0.02417935      | 9.89376                             | 8.64581                             |
| 0.4            | 0.02920457      | 9.87964                             | 8.64533                             |

### 3.1.3 Fitting

Job's plot analysis of the binding between hexadecyltrimethylammonium chloride and the macrocycle **3d** suggested a simple 1:1 binding isotherm was not appropriate (Figure S4).

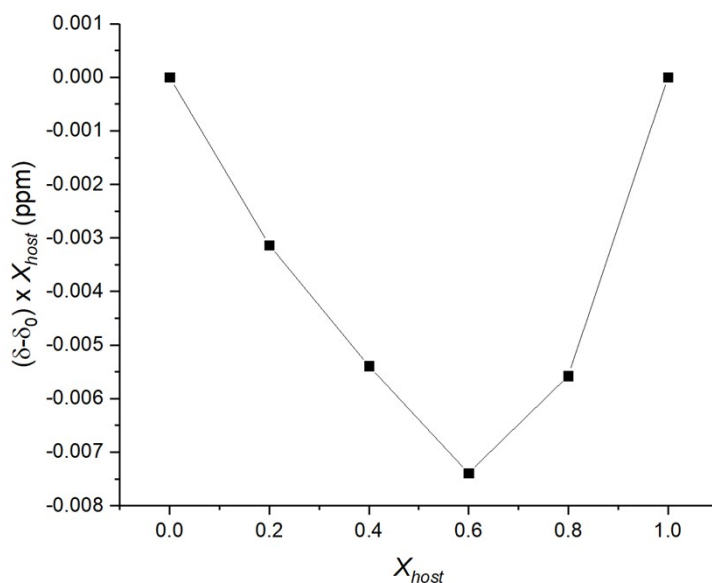

**Figure S4.** Job's plot for the binding of hexadecyltrimethylammonium chloride to macrocycle **3a**, determined by  $^1\text{H}$  NMR ( $\text{CDCl}_3$ , 400 MHz).

NMR chemical shift data for  $\text{H}^{\text{A}}$  and  $\text{H}^{\text{B}}$  were fitted using Bindfit.<sup>[8,9]</sup> Fitting curves and residuals are shown in Figure S5.

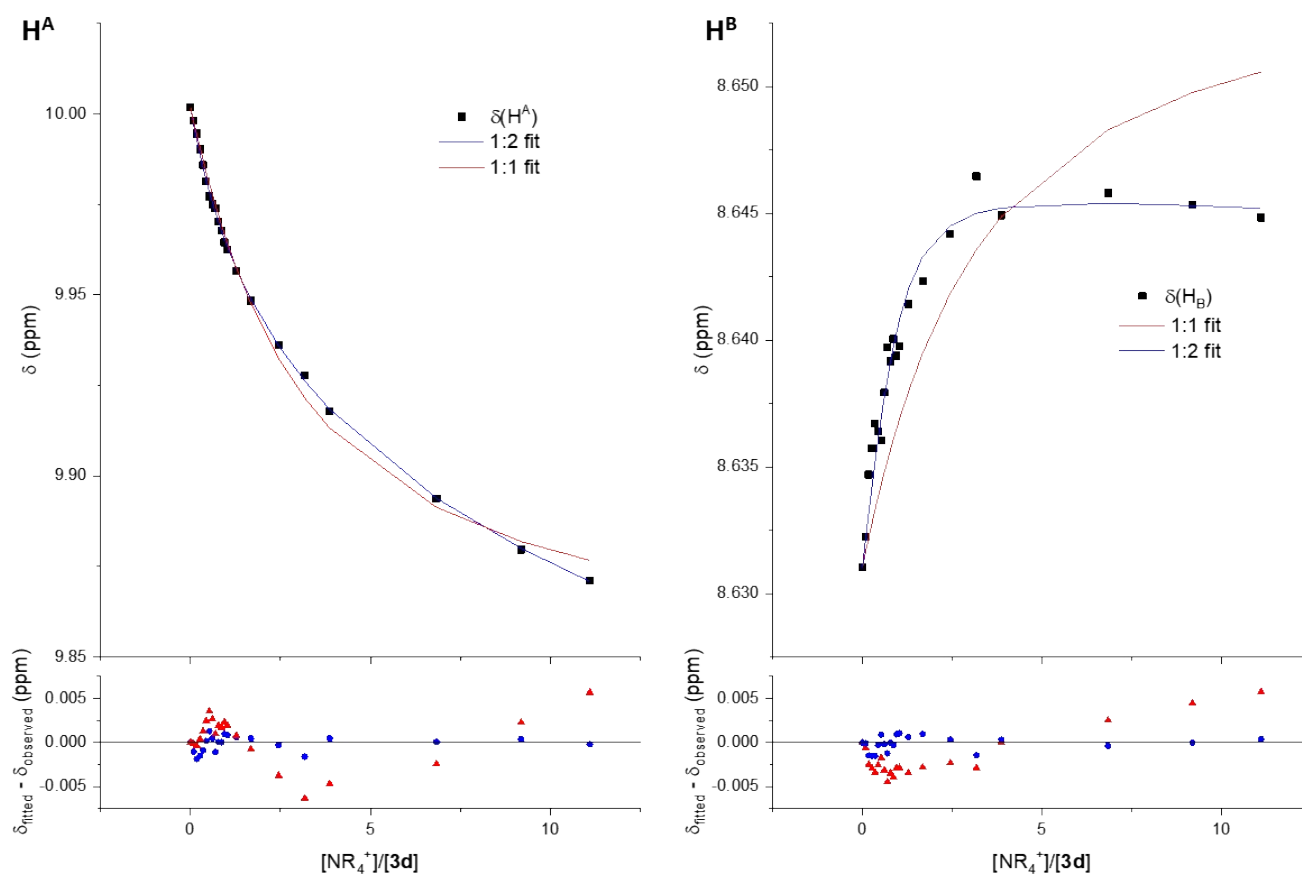

**Figure S5.** Top:  $^1\text{H}$  NMR chemical shift values of  $\text{H}^{\text{A}}$  (left) and  $\text{H}^{\text{B}}$  (right) in macrocycle **3d** upon addition of dodecyltrimethylammonium chloride as described above. Measured chemical shifts are indicated by black squares. Fitted curves are overlaid for 1:1 (red) and 1:2 (blue) **3a**: $\text{NR}_4^+$  isotherm models. Bottom: residual curves for 1:1 (red triangle) and 1:2 (blue circle) binding isotherm models.

This analysis is suggestive of a 1:2 host:guest binding mode between **3a** and the ammonium salt, since when a 1:2 binding isotherm model is applied, the residuals ( $\delta_{\text{fitted}} - \delta_{\text{observed}}$ ) more closely resemble a random distribution around  $y = 0$ , as proposed by Jurczak.<sup>[10]</sup> Application of the 1:2 binding model leads to a first binding constant  $K_{11} = 1550 \pm 120 \text{ M}^{-1}$  and second  $K_{12} = 28 \pm 1 \text{ M}^{-1}$ . The robustness of these fitted parameters was verified by conducting the fit from a range of different initial guess values for  $K_{11}$  and  $K_{12}$ , and using both the Nelder-Mead and Limited-Memory Broyden-Fletcher-Goldfarb-Shanno with Box constraint (L-BFGS-B) fitting algorithms (Table S2). In all cases, the algorithm converged on the same fitted binding constants.

**Table S2.** Fitted binding constants generated within Bindfit from a range of initial guesses and using different algorithmic methods. Raw outputs for each case are shown below.

| Method      | Initial Guess ( $\text{M}^{-1}$ ) |          | Fit Values ( $\text{M}^{-1}$ ) |          | Error (%) |          |
|-------------|-----------------------------------|----------|--------------------------------|----------|-----------|----------|
|             | $K_{11}$                          | $K_{12}$ | $K_{11}$                       | $K_{12}$ | $K_{11}$  | $K_{12}$ |
| Nelder-Mead | 1                                 | 100      | 1554                           | 28       | 7.7       | 2.6      |
| Nelder-Mead | 1                                 | 1        | 1554                           | 28       | 7.7       | 2.6      |
| Nelder-Mead | 100                               | 1        | 1554                           | 28       | 7.7       | 2.6      |
| L-BFGS-B    | 1                                 | 100      | 1554                           | 28       | 7.7       | 2.6      |
| L-BFGS-B    | 1                                 | 1        | 1554                           | 28       | 7.7       | 2.6      |
| L-BFGS-B    | 100                               | 1        | 1554                           | 28       | 7.7       | 2.6      |

  

|                                 |                                                                                                    |                |                        |                                 |                                                                                                    |                |                      |                                 |                                                                                                    |                |                        |         |
|---------------------------------|----------------------------------------------------------------------------------------------------|----------------|------------------------|---------------------------------|----------------------------------------------------------------------------------------------------|----------------|----------------------|---------------------------------|----------------------------------------------------------------------------------------------------|----------------|------------------------|---------|
| Nelder-Mead<br>output           | <b>Details</b><br>Time to fit 1.7940 s<br>SSR 2.8899e-5<br>Fitted datapoints 42<br>Fitted params 6 |                |                        |                                 | <b>Details</b><br>Time to fit 1.4107 s<br>SSR 2.8899e-5<br>Fitted datapoints 42<br>Fitted params 6 |                |                      |                                 | <b>Details</b><br>Time to fit 1.4531 s<br>SSR 2.8899e-5<br>Fitted datapoints 42<br>Fitted params 6 |                |                        |         |
|                                 | <b>Parameters</b>                                                                                  |                |                        |                                 | <b>Parameters</b>                                                                                  |                |                      |                                 | <b>Parameters</b>                                                                                  |                |                        |         |
|                                 | Parameter (bounds)                                                                                 | Optimised      | Error                  | Initial                         | Parameter (bounds)                                                                                 | Optimised      | Error                | Initial                         | Parameter (bounds)                                                                                 | Optimised      | Error                  | Initial |
| $K_{11} (0 \rightarrow \infty)$ | 1554.11 $\text{M}^{-1}$                                                                            | $\pm 7.6950$ % | 1.00 $\text{M}^{-1}$   | $K_{11} (0 \rightarrow \infty)$ | 1554.11 $\text{M}^{-1}$                                                                            | $\pm 7.6950$ % | 1.00 $\text{M}^{-1}$ | $K_{11} (0 \rightarrow \infty)$ | 1554.11 $\text{M}^{-1}$                                                                            | $\pm 7.6950$ % | 100.00 $\text{M}^{-1}$ |         |
| $K_{12} (0 \rightarrow \infty)$ | 28.12 $\text{M}^{-1}$                                                                              | $\pm 2.5941$ % | 100.00 $\text{M}^{-1}$ | $K_{12} (0 \rightarrow \infty)$ | 28.12 $\text{M}^{-1}$                                                                              | $\pm 2.5941$ % | 1.00 $\text{M}^{-1}$ | $K_{12} (0 \rightarrow \infty)$ | 28.12 $\text{M}^{-1}$                                                                              | $\pm 2.5941$ % | 1.00 $\text{M}^{-1}$   |         |

  

|                                 |                                                                                                    |                |                        |                                 |                                                                                                    |                |                      |                                 |                                                                                                    |                |                        |         |
|---------------------------------|----------------------------------------------------------------------------------------------------|----------------|------------------------|---------------------------------|----------------------------------------------------------------------------------------------------|----------------|----------------------|---------------------------------|----------------------------------------------------------------------------------------------------|----------------|------------------------|---------|
| L-BFGS-B<br>output              | <b>Details</b><br>Time to fit 1.0942 s<br>SSR 2.8899e-5<br>Fitted datapoints 42<br>Fitted params 6 |                |                        |                                 | <b>Details</b><br>Time to fit 1.4351 s<br>SSR 2.8899e-5<br>Fitted datapoints 42<br>Fitted params 6 |                |                      |                                 | <b>Details</b><br>Time to fit 1.2042 s<br>SSR 2.8899e-5<br>Fitted datapoints 42<br>Fitted params 6 |                |                        |         |
|                                 | <b>Parameters</b>                                                                                  |                |                        |                                 | <b>Parameters</b>                                                                                  |                |                      |                                 | <b>Parameters</b>                                                                                  |                |                        |         |
|                                 | Parameter (bounds)                                                                                 | Optimised      | Error                  | Initial                         | Parameter (bounds)                                                                                 | Optimised      | Error                | Initial                         | Parameter (bounds)                                                                                 | Optimised      | Error                  | Initial |
| $K_{11} (0 \rightarrow \infty)$ | 1553.78 $\text{M}^{-1}$                                                                            | $\pm 7.6940$ % | 1.00 $\text{M}^{-1}$   | $K_{11} (0 \rightarrow \infty)$ | 1554.17 $\text{M}^{-1}$                                                                            | $\pm 7.6952$ % | 1.00 $\text{M}^{-1}$ | $K_{11} (0 \rightarrow \infty)$ | 1554.30 $\text{M}^{-1}$                                                                            | $\pm 7.6956$ % | 100.00 $\text{M}^{-1}$ |         |
| $K_{12} (0 \rightarrow \infty)$ | 28.12 $\text{M}^{-1}$                                                                              | $\pm 2.5941$ % | 100.00 $\text{M}^{-1}$ | $K_{12} (0 \rightarrow \infty)$ | 28.12 $\text{M}^{-1}$                                                                              | $\pm 2.5941$ % | 1.00 $\text{M}^{-1}$ | $K_{12} (0 \rightarrow \infty)$ | 28.12 $\text{M}^{-1}$                                                                              | $\pm 2.5941$ % | 1.00 $\text{M}^{-1}$   |         |

The binding of the cationic ammonium salt by the macrocycle is believed to be mediated by C-H $\cdots$ O hydrogen bonds formed with between the acidified  $\alpha$ -hydrogens of the ammonium salt and the imidazolidin-2-one carbonyl groups. Evidence for specific binding of the ammonium head-group (as opposed to e.g. hydrophobic effects) is found through examination of the chemical shift changes of the hexadecyltrimethylammonium salt itself. In the following discussion we follow the naming convention of Magid,<sup>[11]</sup> where the  $^1\text{H}$  NMR chemical shift environments are divided into the head group (*hg*),  $\alpha$ ,  $\beta$ ,  $\gamma'$ , main chain (*mc*) and  $\omega$  positions (Figure S6).

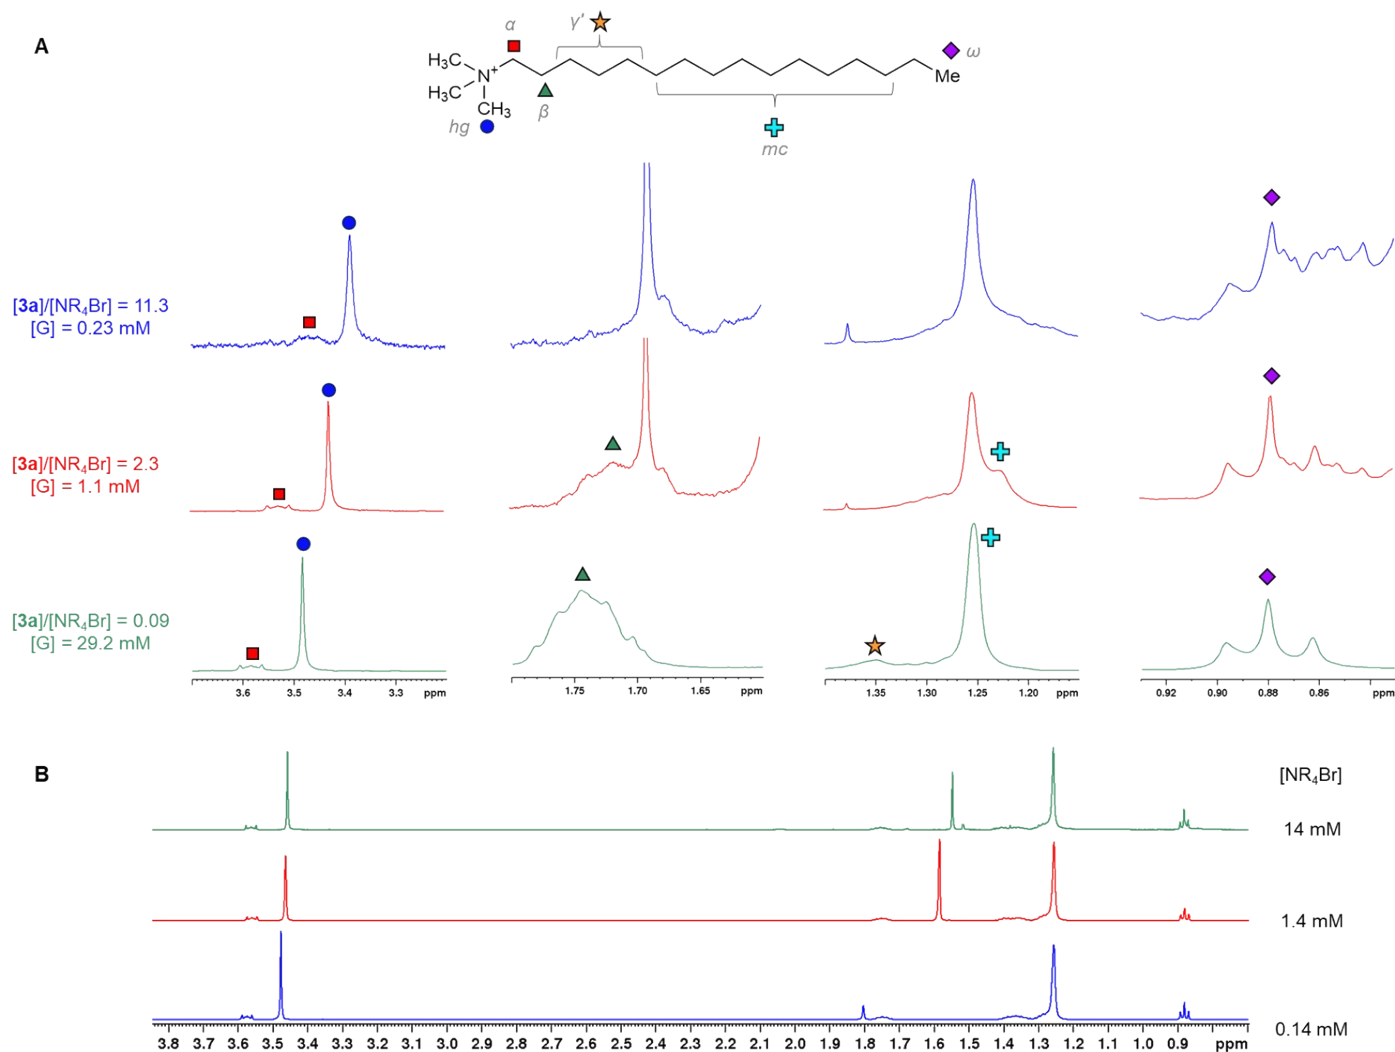

**Figure S6. A.** Evidence for interaction *via* N<sup>+</sup>C-H···O interactions. Peak regions within the hexadecylammonium salt (NR<sub>4</sub>Br) are denoted as follows: head group (*hg*, blue circle),  $\alpha$  (red square),  $\beta$  (green triangle),  $\gamma'$  (yellow star), *mc* (teal star),  $\omega$  (purple diamond). **B.** Serial dilution of a solution of hexadecyltrimethylammonium bromide in CDCl<sub>3</sub> showing minimal change in chemical shift across a 100-fold change in concentration.

A upon addition of the host **3a**, a strong upfield shift is observed in the *hg*- and  $\alpha$ -environments, with overall  $\Delta\delta$  values across the concentration range investigated of 0.093 and 0.115 ppm respectively. While the precise chemical shifts of the  $\beta$ - and  $\gamma'$ -hydrogens are not discernible in the [H]/[G] = 11.3 sample, they display much smaller  $\Delta\delta$  shifts than the *hg*- and  $\alpha$ -hydrogens in the [H]/[G] = 2.3 relative to the [H]/[G] = 0.09 spectrum, as do the *mc*- and  $\omega$ -hydrogens. These data are consistent with binding occurring primarily through hydrogen bonding at the *hg*- and  $\alpha$ -hydrogens, which has previously been demonstrated to induce an upfield shift in the hydrogens adjacent to the tetrasubstituted nitrogen both in molecular recognition<sup>[12–16]</sup> and more recently in asymmetric catalysis<sup>[17,18]</sup> applications. Spectral excerpts are taken directly from the **3a**/NR<sub>4</sub><sup>+</sup>Br titration described above, so host concentration is constant for all spectra while guest concentration is varied. The validity of this approach was confirmed by a dilution study on pure ammonium salt, which indicated minimal chemical shift change as a function of concentration (with the exception of the residual water peak) in CDCl<sub>3</sub> (Figure S6B). Small upfield shifts in *hg*- and  $\alpha$ -hydrogens were observed upon increasing concentration ( $\Delta\delta \approx 0.02$  ppm), but these changes are dwarfed by those seen in the titration experiment so can be disregarded.

## 3.2 Dibenzoyl Tartaric Acid (DBTA) Binding

### 3.2.1 Host and Guest Solution Preparation

Macrocycle **3b** (910  $\mu$ g, 0.312  $\mu$ mol) was dissolved in CDCl<sub>3</sub>, made up to a total volume of 1.000 mL (0.312  $\mu$ M), and the volumetric flask was sealed with parafilm and refrigerated to prevent evaporation.



Dibenzoyl-*L*-tartaric acid (500 mg, 1.40 mmol) was dissolved in CDCl<sub>3</sub>, made up to a total volume of 10.00 mL (0.140 M), and the volumetric flask was sealed with parafilm and refrigerated to prevent evaporation. An identical method was used to prepare the stock solution of dibenzoyl-*D*-tartaric acid.

### 3.2.2 NMR Titrations

The <sup>1</sup>H NMR spectra of the macrocycles display no measurable change with concentration in the range 0 – 1 μM, so titrations were carried out on a single sample with aliquots of guest added incrementally.

The stock solution of **3b** (0.30 mL, 0.0936 μmol) was placed in an NMR tube and further diluted with CDCl<sub>3</sub> (0.30 mL) to a total volume of 0.60 mL. The dibenzoyl tartaric acid stock solutions were added without further dilution according to the schedule below.

| Entry | Vol DBTA stock added (μL) | Total Vol DBTA stock added (μL) | Total amount DBTA added (μmol) | [DBTA]/[3b] |
|-------|---------------------------|---------------------------------|--------------------------------|-------------|
| 1     | 0                         | 0                               | 0                              | 0           |
| 2     | 2.24                      | 2.24                            | 0.313                          | 3.339658    |
| 3     | 2.24                      | 4.48                            | 0.625                          | 6.679316    |
| 4     | 2.24                      | 6.72                            | 0.938                          | 10.01897    |
| 5     | 2.24                      | 8.96                            | 1.250                          | 13.35863    |
| 6     | 2.24                      | 11.2                            | 1.563                          | 16.69829    |
| 7     | 2.24                      | 13.44                           | 1.876                          | 20.03795    |
| 8     | 2.24                      | 15.68                           | 2.188                          | 23.37761    |
| 9     | 2.24                      | 17.92                           | 2.501                          | 26.71726    |
| 10    | 2.24                      | 20.16                           | 2.813                          | 30.05692    |
| 11    | 2.24                      | 22.4                            | 3.126                          | 33.39658    |
| 12    | 11.2                      | 33.6                            | 4.689                          | 50.09487    |
| 13    | 11.2                      | 44.8                            | 6.252                          | 66.79316    |
| 14    | 22.4                      | 67.2                            | 9.378                          | 100.1897    |

The results of these titrations are displayed in figure S7 below. These indicate that the macrocycle does not differentiate between enantiomers of DBTA to any significant extent, with binding constants of 51 M<sup>-1</sup> and 56 M<sup>-1</sup> (for *D* and *L*-enantiomers respectively) the same within experimental error.

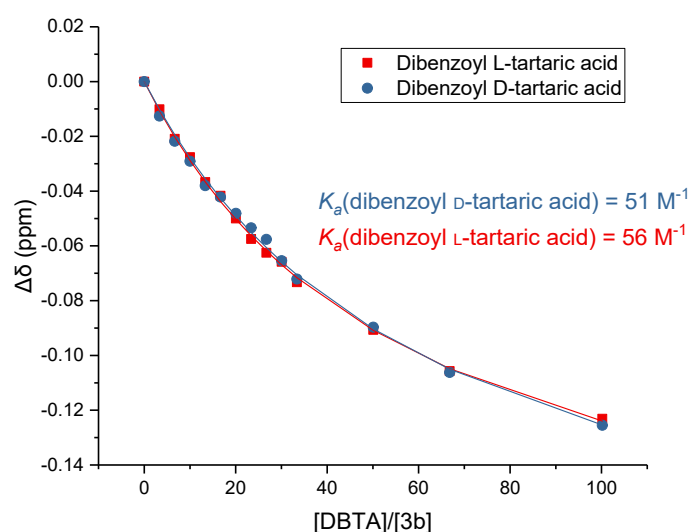

**Figure S7.** <sup>1</sup>H NMR titration data indicating chemical shift change in the inward-pointing pyrimidine hydrogen of **3b** (cf. H<sup>A</sup> in Figure S1), upon addition of both enantiomers of dibenzoyl tartaric acid (DBTA). Individual datapoints represent raw data, and lines indicate fitting curves as produced by Bindfit according to a 1:1 binding model.

## 4 X-Ray Crystallography

Data for compounds **1a**, **2a**, **2d** and **3a** were collected as described in the General Experimental section. For full details on the collection and refinement of crystal data, please refer to the cif files, accessible from the ccdc using the accession numbers given below.

### 4.1 *t*-Bu Protected Dimer **1a** (CCDC #2057484)

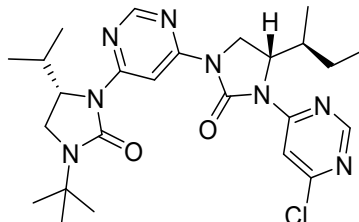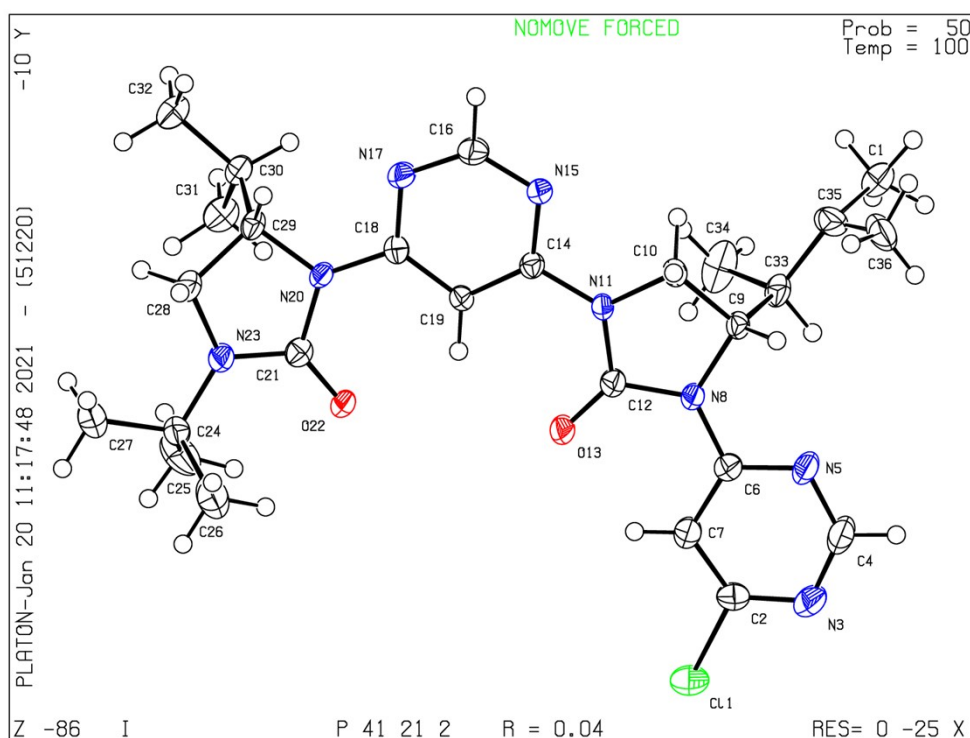

#### 4.1.1 Crystal Data

$a = 12.05260(10) \text{ \AA}$   $\alpha = 90^\circ$

$b = 12.05260(10) \text{ \AA}$   $\beta = 90^\circ$

$c = 37.0309(5) \text{ \AA}$   $\gamma = 90^\circ$

Volume  $5379.30(12) \text{ \AA}^3$

Space group  $P 4_1 2_1 2$

Formula  $C_{25} H_{34} Cl N_8 O_2$

Cell determined from 14408 reflections

Temperature 100K

Pressure 100 kPa

Colour clear\_pale\_colourless

$D_x$   $1.27 \text{ Mg m}^{-3}$

$\mu$   $1.562 \text{ mm}^{-1}$

Absorption correction multi-scan

Crystal Class tetragonal

$Z = 8$

$M_r$  514.05

Cell  $\theta$  range =  $5 - 71^\circ$

blocks

Size  $0.60 \times 0.50 \times 0.50 \text{ mm}$

F000 2184.000

$T_{\min}$  0.26  $T_{\max}$  0.39

#### 4.1.2 Data Collection

Diffractometer multi-scan  
Scan type  $\omega$  scans  
Reflections measured 22811  
Independent reflections 5157  
Rint 0.0306  
 $\theta_{\max}$  71.2738  
h = -14  $\rightarrow$  14  
k = -9  $\rightarrow$  14  
l = -45  $\rightarrow$  35

#### 4.1.3 Refinement

$\Delta\rho_{\min} = -0.22 \text{ e } \text{\AA}^{-3}$   
 $\Delta\rho_{\max} = 0.34 \text{ e } \text{\AA}^{-3}$   
Reflections used 5135  
Cutoff:  $I > -3.00\sigma(I)$   
Parameters refined 334  
S = 1.17  
R-factor 0.044  
weighted R-factor 0.058  
 $\Delta/\sigma_{\max}$  0.0093  
Flack parameter 0.032(5) Parsons, Flack & Wagner (2013)  
Refinement on  $F^2$

#### 4.2 Dimer 2a (CCDC #2057483)

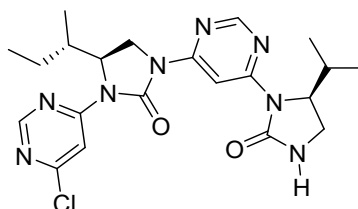

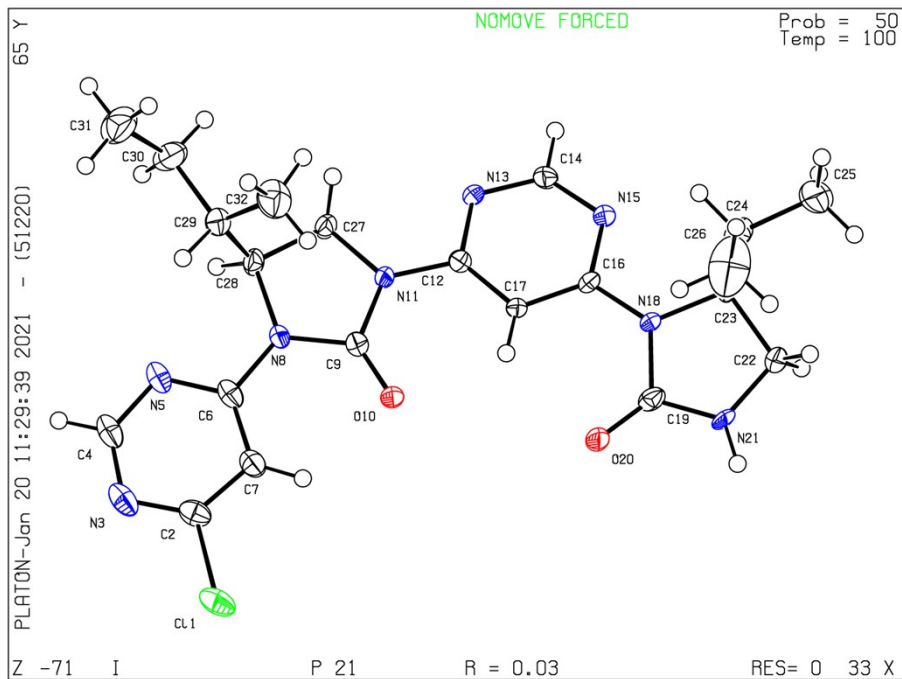

#### 4.2.1 Crystal Data

$a = 9.69330(10) \text{ \AA}$   $\alpha = 90^\circ$

$b = 9.01790(10) \text{ \AA}$   $\beta = 90.0868(8)^\circ$

$c = 13.41980(10) \text{ \AA}$   $\gamma = 90^\circ$

Volume  $1173.07(2) \text{ \AA}^3$

Space group  $P 2_1$

Formula  $C_{21} H_{27} Cl N_8 O_2$

Cell determined from 9280 reflections

Temperature 100K

Pressure 100 kPa

Shape

Crystal Class monoclinic

$Z = 2$

$M_r = 458.9497$

Cell  $\theta$  range =  $6 - 71^\circ$

Colour clear\_pale\_colourless

needle

Size  $0.50 \times 0.40 \times 0.40 \text{ mm}$

$D_x = 1.30 \text{ Mg m}^{-3}$

F000 484.000

$\mu = 1.728 \text{ mm}^{-1}$

Absorption correction multi-scan

$T_{\min} = 0.32$

$T_{\max} = 0.42$

#### 4.2.2 Data Collection

Diffractometer multi-scan

Scan type  $\omega$  scans

Reflections measured 10892

Independent reflections 3858

Rint 0.0271

$\theta_{\max} = 71.3843$

$h = -11 \rightarrow 11$

$k = -10 \rightarrow 7$

$l = -16 \rightarrow 16$

#### 4.2.3 Refinement

$\Delta\rho_{\min} = -0.20 \text{ e \AA}^{-3}$

$\Delta\rho_{\max} = 0.22 \text{ e \AA}^{-3}$

Reflections used 3842

Cutoff:  $I > -3.00\sigma(I)$   
 Parameters refined 294  
 S = 1.95  
 R-factor 0.034  
 weighted R-factor 0.064  
 $\Delta/\sigma_{\max}$  0.0099  
 Flack parameter 0.015(5) Parsons, Flack & Wagner (2013)  
 Refinement on  $F^2$

### 4.3 Dimer 2d (CCDC #2057482)

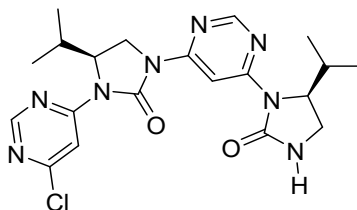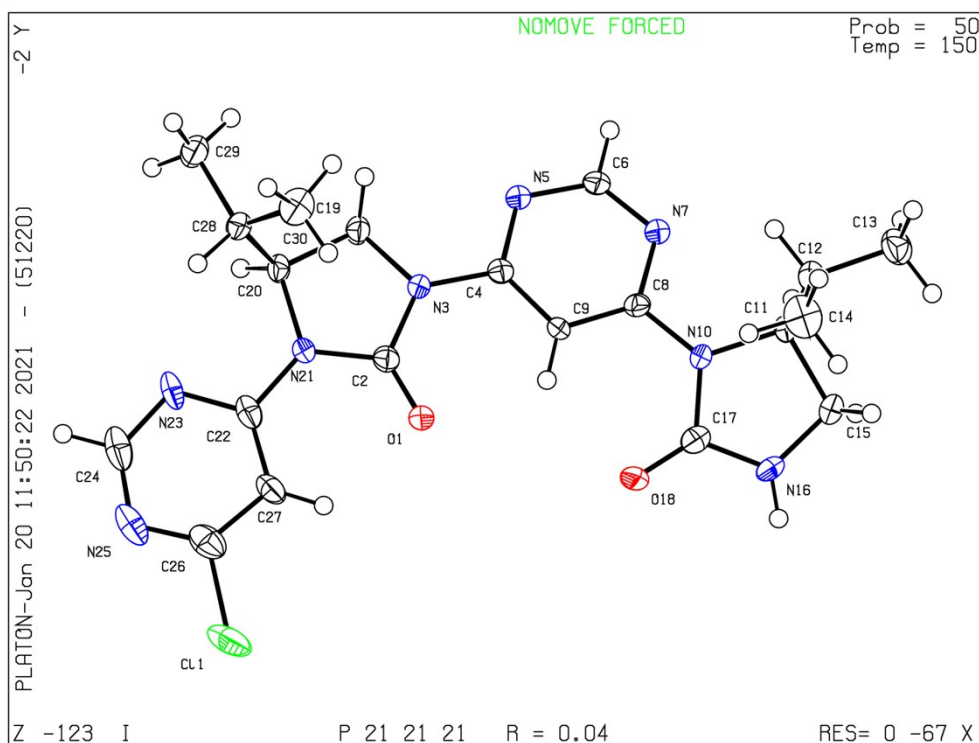

#### 4.3.1 Crystal Data

$a = 8.9540(2) \text{ \AA}$   $\alpha = 90^\circ$

$b = 14.9196(3) \text{ \AA}$   $\beta = 90^\circ$

$c = 16.0420(3) \text{ \AA}$   $\gamma = 90^\circ$

Volume  $2143.05(8) \text{ \AA}^3$

Space group  $P 2_1 2_1 2_1$

Formula  $C_{20} H_{25} Cl N_8 O_8$

Cell determined from 4064 reflections

Temperature 150K

Pressure 100 kPa

Crystal Class orthorhombic

Z = 4

$M_r$  444.93

Cell  $\theta$  range = 6 - 71°

Shape needles

|                       |                         |                  |                       |
|-----------------------|-------------------------|------------------|-----------------------|
| Colour                | clear_pale_colourless   | Size             | 0.40 × 0.15 × 0.10 mm |
| D <sub>x</sub>        | 1.38 Mg m <sup>-3</sup> | F000             | 936.000               |
| μ                     | 1.875 mm <sup>-1</sup>  |                  |                       |
| Absorption correction | multi-scan              |                  |                       |
| T <sub>min</sub>      | 0.36                    | T <sub>max</sub> | 0.47                  |

#### 4.3.2 Data Collection

|                         |            |
|-------------------------|------------|
| Diffractometer          | multi-scan |
| Scan type               | ω scans    |
| Reflections measured    | 6522       |
| Independent reflections | 4053       |
| R <sub>int</sub>        | 0.0265     |
| θ <sub>max</sub>        | 71.3775    |
| h =                     | -7 → 10    |
| k =                     | -17 → 18   |
| l =                     | -18 → 19   |

#### 4.3.3 Refinement

|                     |                         |                                |
|---------------------|-------------------------|--------------------------------|
| Δρ <sub>min</sub> = | -0.20 e Å <sup>-3</sup> |                                |
| Δρ <sub>max</sub> = | 0.31 e Å <sup>-3</sup>  |                                |
| Reflections used    | 4053                    |                                |
| Cutoff: I >         | -3.00σ(I)               |                                |
| Parameters refined  | 285                     |                                |
| S =                 | 1.87                    |                                |
| R-factor            | 0.038                   |                                |
| weighted R-factor   | 0.043                   |                                |
| Δ/σ <sub>max</sub>  | 0.0014                  |                                |
| Flack parameter     | -0.003(10)              | Parsons, Flack & Wagner (2013) |
| Refinement on       | F <sup>2</sup>          |                                |

#### 4.4 Macrocyclic Tetramer 3a (CCDC #2057486)

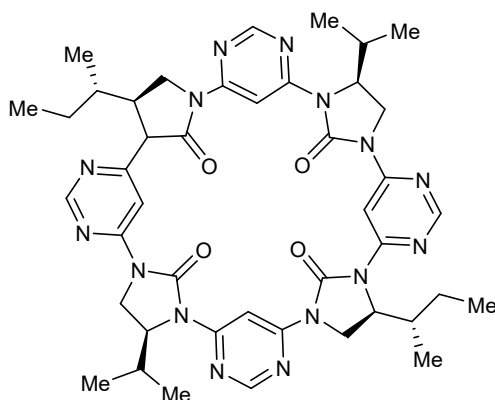

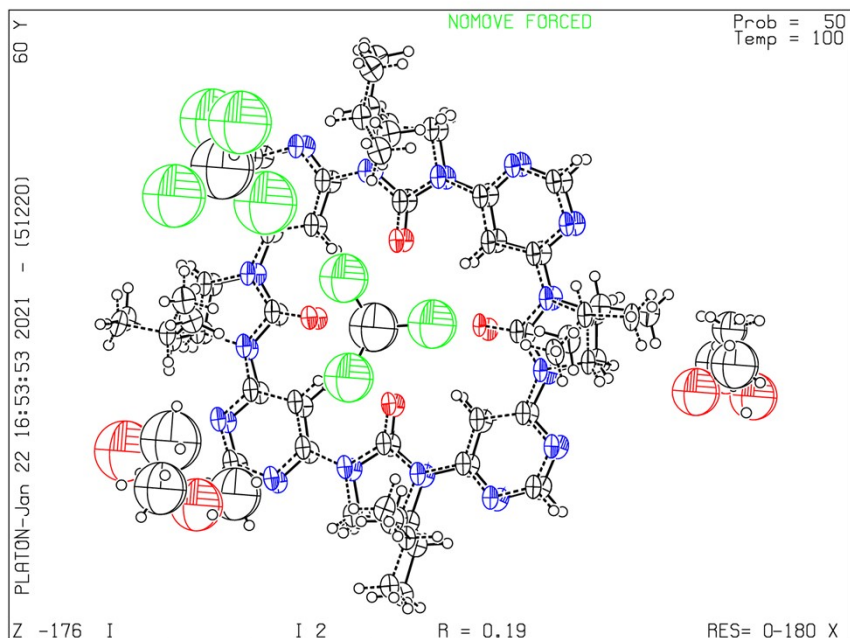

#### 4.4.1 Crystal Data

$a = 12.00486(4) \text{ \AA}$   $\alpha = 90^\circ$

$b = 15.58877(3) \text{ \AA}$   $\beta = 96.150(5)^\circ$

$c = 23.79439(4) \text{ \AA}$   $\gamma = 90^\circ$

Volume  $5279.29(6) \text{ \AA}^3$

Space group  $I 2$

Formula  $C_{42.64} H_{56.23} Cl_{3.11} N_{16} O_{5.46}$

Cell determined from 4657 reflections

Temperature 293K

Pressure 100 kPa

Colour clear\_pale\_colourless

$D_x = 1.246 \text{ Mg m}^{-3}$

$\mu = 2.098 \text{ mm}^{-1}$

Absorption correction multi-scan

$T_{\min} = 0.14$

Crystal Class monoclinic

$Z = 4$

$M_r = 990.44$

Cell  $\theta$  range = 3 - 68°

Shape plates

Size  $0.22 \times 0.14 \times 0.005 \text{ mm}$

$F_{000} = 2082.261$

$T_{\max} = 0.99$

#### 4.4.2 Data Collection

Diffractometer multi-scan

Scan type  $\omega$  scans

Reflections measured 31995

Independent reflections 9165

$R_{\text{int}} = 0.114$

$\theta_{\max} = 68.242$

$h = -13 \rightarrow 14$

$k = -22 \rightarrow 22$

$l = -28 \rightarrow 28$

#### 4.4.3 Refinement

$\Delta\rho_{\min} = -0.69 \text{ e \AA}^{-3}$

$\Delta\rho_{\max} = 0.71 \text{ e \AA}^{-3}$

|                        |                    |                                   |
|------------------------|--------------------|-----------------------------------|
| Reflections used       | 6744               |                                   |
| Cutoff: I >            | -3.00 $\sigma$ (I) |                                   |
| Parameters refined     | 406                |                                   |
| S =                    | 1.7645             |                                   |
| R-factor               | 0.225              |                                   |
| weighted R-factor      | 0.498              |                                   |
| $\Delta/\sigma_{\max}$ | 0.037              |                                   |
| Flack parameter        | 0.22(4)            | Parsons, Flack & Wagner<br>(2013) |
| Refinement on          | F <sup>2</sup>     |                                   |

Portions of the macrocyclic skeleton were found in the raw structure solution from Superflip. With the exception of the side chains, the rest of the structure was resolved by Fourier cycles. The refinement was not stable, and restraints were applied to bond distances following measurements from a previous structure (CCDC #1824642) corresponding to the repeating motif in the present structure. The first carbon of the side chains was then resolvable in the Fourier map, and in agreement with the expected chirality. Refinement of the anisotropic ADPs revealed that there was extensive disorder in the macrocycle position along the vector perpendicular to its plane. The molecule was then modelled over two positions, and with competitively refined occupancy. Further side chain structure then became visible, although it was not possible to distinguish between valine and isoleucine-derived monomers, with the additional methyl unit failing to appear or to refine to physically reasonable positions even when restrained. The anisotropic ADPs of both sets of atoms for the macrocycle were still prolate beyond physically reasonable limits, and so restrained refinement from isotropic ADPs was performed to account for electron density, before fixing the ADPs. The macrocycle could feasibly be modelled over more than two locations, but the qualitative description of the structure would not be more precise - there is extensive disorder in position perpendicular to the plane of the macrocycle. Hydrogen atoms were added geometrically, and the solvent was modelled by examination of slant Fourier maps. While we are confident of the location and orientation of the chloroform molecules, the ethanol molecules are more speculative. Solvent molecules were refined isotropically and with partial occupancies. Weights were selected and the structure was refined to convergence.

This is a low-quality structure and only information about connectivity, relative molecular position and orientation, and gross conformation of the main residue should be taken with any level of confidence. There are no fully ordered portions.



## 5 Density Functional Theory Calculations

All optimisation, frequency, and single-point calculations were performed with *Gaussian 16*, rev A.03.<sup>[19]</sup> Structures are displayed with CYLView.<sup>[20]</sup> The B3LYP functional was used for all geometry optimisations with the 6-31G(d,p) basis set on all atoms unless otherwise stated. Grimme's DFT-D3BJ correction was included in the optimisation procedure as well as single point calculations.<sup>[21]</sup> All optimised structures were confirmed as minima by the absence of imaginary harmonic frequencies. Further refinements to the electronic energies were made through single point calculations on the optimised geometries using the B3LYP functional with the 6-311+G(d,p) basis set for all atoms. Grimme's DFT-D3BJ correction and further corrections for bulk solvation through a polarisable continuum model (PCM) with description of toluene in all calculations were also incorporated. Free energies were determined from thermochemical corrections of the geometries applied to electronic energies. Coordinates for all minimized geometries are given below (§8, pg. 162)

### 5.1 Trimer Summary (See Figure 3B)

Two conformations of the trimer were found, both bowl shaped, with the R group sidechains in either pseudo-axial or equatorial positions. No other conformations, including a flat or staggered arrangement of each monomeric unit, could be found. The pseudo-equatorial conformation was consistently more stable. This was found to hold true for a number of different functionals employed during optimisation (Table S3) with relative energies very similar in each case.

**Table S3.** Relative energies of pseudo-axial and equatorial conformations R=Me trimer using different functionals during optimisation. B3LYP and B3PW91 include D3BJ corrections, M062X and  $\omega$ b97xd do not. Single point energy calculations performed at B3LYP-D3BJ-PCM<sub>Toluene</sub>/6-311+G(d,p) throughout.

| Optimisation Functional | ddG (kcal mol <sup>-1</sup> ) |
|-------------------------|-------------------------------|
| B3LYP                   | 5.8                           |
| B3PW91                  | 6.0                           |
| M062X                   | 6.6                           |
| $\omega$ b97xd          | 5.8                           |

For the B3LYP functional, the effects of solvation and dispersion during singled point energy calculations were examined (Table S4). While the inclusion of solvation makes only a minor change in the relative energy, inclusion of dispersion corrections prompts a very large decrease in relative energies of the conformers, 4.2 kcal mol<sup>-1</sup> for R=Me. Notably, the stabilisation offered by the inclusion of dispersion corrections increases as the size of the sidechain R groups increases and the dispersion level contacts between ends of the sidechain become more numerous.

**Table S4.** Effect of solvation and dispersion corrections on relative energies of pseudo-axial and equatorial conformations of trimers of various R groups.

|                                 | R=Me | R=ABC | R=iPr |
|---------------------------------|------|-------|-------|
| SP                              | 10.3 | 16.5  | 17.1  |
| SP/PCM <sub>Toluene</sub>       | 10.0 | 16.0  | 16.5  |
| SP/D3BJ                         | 6.2  | 6.4   | 3.2   |
| SP/PCM <sub>Toluene</sub> /D3BJ | 5.8  | 6.0   | 2.6   |

## 5.2 Tetramer Summary (See Figure 3a)

A significant degree of conformational flexibility was observed, with many essentially isoenergetic conformations found, although all retained the shallow bowl conformation when R=Me, two examples are shown in Figure S8. The conformation when one carbonyl is on a different face to the other three is 0.17 kcal mol<sup>-1</sup> higher in energy compared to when all are pointing towards the same face. All attempts at finding the pseudo-axial conformation of the tetramer optimised to the pseudo-equatorial.

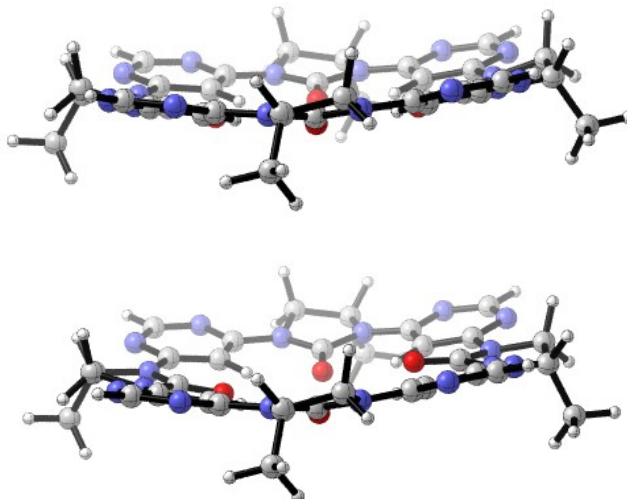

**Figure S8.** Examples of different shallow bowl conformations found when R=Me.

When R=H, one conformation was found which was entirely flat (Figure S9). O-O distances are slightly shorted in this conformation at 3.6 and 5.0 Å. However, this was 3.9 kcal mol<sup>-1</sup> higher in energy than any other shallow bowl conformations, making this conformation highly unfavoured.

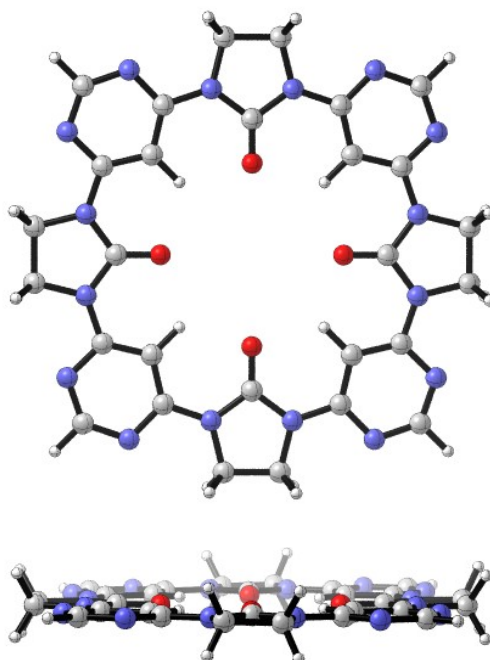

**Figure S9.** Tetramer flat conformation when R=H.

## 6 Supplementary References

- [1] J. Cosier, A. M. Glazer, *J. Appl. Crystallogr.* **1986**, *19*, 105–107.
- [2] *CrysAlisPRO*, Oxford Diffraction/Agilent Technologies UK Ltd, Yarnton, England, **n.d.**
- [3] L. Palatinus, G. Chapuis, *J. Appl. Crystallogr.* **2007**, *40*, 786–790.
- [4] P. W. Betteridge, J. R. Carruthers, R. I. Cooper, K. Prout, D. J. Watkin, *J. Appl. Crystallogr.* **2003**, *36*, 1487.
- [5] R. I. Cooper, A. L. Thompson, D. J. Watkin, *J. Appl. Crystallogr.* **2008**, *43*, 1100–1107.
- [6] Z. Lockhart, P. C. Knipe, *Angew. Chem. Int. Ed.* **2018**, *57*, 8478–8482.
- [7] P. Jain, I. O. Raji, S. Chamakuri, K. R. MacKenzie, B. T. Ebright, C. Santini, D. W. Young, *J. Org. Chem.* **2019**, *84*, 6040–6064.
- [8] P. Thordarson, *Chem. Soc. Rev.* **2011**, *40*, 1305–1323.
- [9] [www.supramolecular.org](http://www.supramolecular.org)
- [10] F. Ulatowski, K. Dabrowa, T. Bałakier, J. Jurczak, *J. Org. Chem.* **2016**, *81*, 1746–1756.
- [11] P. J. Kreke, L. J. Magid, J. C. Gee, *Langmuir* **1996**, *12*, 699–705.
- [12] D. A. Stauffer, D. A. Dougherty, *Tetrahedron Lett.* **1988**, *29*, 6039–6042.
- [13] L. Garel, B. Lozach, J. P. Dutasta, A. Collet, *J. Am. Chem. Soc.* **1993**, *115*, 11652–11653.
- [14] A. Arduini, W. M. McGregor, D. Paganuzzi, A. Pochini, A. Secchi, F. Ugozzoli, R. Ungaro, *J. Chem. Soc. Perkin Trans. 2* **1996**, 839–846.
- [15] R. Arnecke, V. Böhmer, R. Cacciapaglia, A. Dalla Cort, L. Mandolini, *Tetrahedron* **1997**, *53*, 4901–4908.
- [16] S. Kubik, *J. Am. Chem. Soc.* **1999**, *121*, 5846–5855.
- [17] S. Shirakawa, S. Liu, S. Kaneko, Y. Kumatabara, A. Fukuda, Y. Omagari, K. Maruoka, *Angew. Chem. Int. Ed.* **2015**, *54*, 15767–15770.
- [18] Y. Kumatabara, S. Kaneko, S. Nakata, S. Shirakawa, K. Maruoka, *Chem. – An Asian J.* **2016**, *11*, 2126–2129.
- [19] M. J. Frisch, G. W. Trucks, H. B. Schlegel, G. E. Scuseria, M. A. Robb, J. R. Cheeseman, G. Scalmani, V. Barone, B. Mennucci, G. A. Petersson, H. Nakatsuji, M. Caricato, X. Li, H. P. Hratchian, A. F. Izmaylov, J. Bloino, G. Zheng, J. L. Sonnenberg, M. Hada, M. Ehara, K. Toyota, R. Fukuda, J. Hasegawa, M. Ishida, T. Nakajima, Y. Honda, O. Kitao, H. Nakai, T. Vreven, J. A. Montgomery Jr., J. E. Peralta, F. Ogliaro, M. Bearpark, J. J. Heyd, E. Brothers, K. N. Kudin, V. N. Staroverov, R. Kobayashi, J. Normand, K. Raghavachari, A. Rendell, J. C. Burant, S. S. Iyengar, J. Tomasi, M. Cossi, N. Rega, J. M. Millam, M. Klene, J. E. Knox, J. B. Cross, V. Bakken, C. Adamo, J. Jaramillo, R. Gomperts, R. E. Stratmann, O. Yazyev, A. J. Austin, R. Cammi, C. Pomelli, J. W. Ochterski, R. L. Martin, K. Morokuma, V. G. Zakrzewski, G. A. Voth, P. Salvador, J. J. Dannenberg, S. Dapprich, A. D. Daniels, O. Farkas, J. B. Foresman, J. V. Ortiz, J. Cioslowski, D. J. Fox, *Gaussian16 (Revision A.03)* **2016**.
- [20] C. Y. Legault, *Univ. Sherbrooke* **2009**.
- [21] S. Grimme, S. Ehrlich, L. Goerigk, *J. Comput. Chem.* **2011**, *32*, 1456–1465.
- [22] P. C. Knipe, S. Thompson, A. D. Hamilton, *Chem. Commun.* **2016**, *52*, 6521–6524.

## 7 NMR Spectra

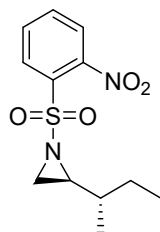

S1  
<sup>1</sup>H NMR  
400 MHz  
CDCl<sub>3</sub>

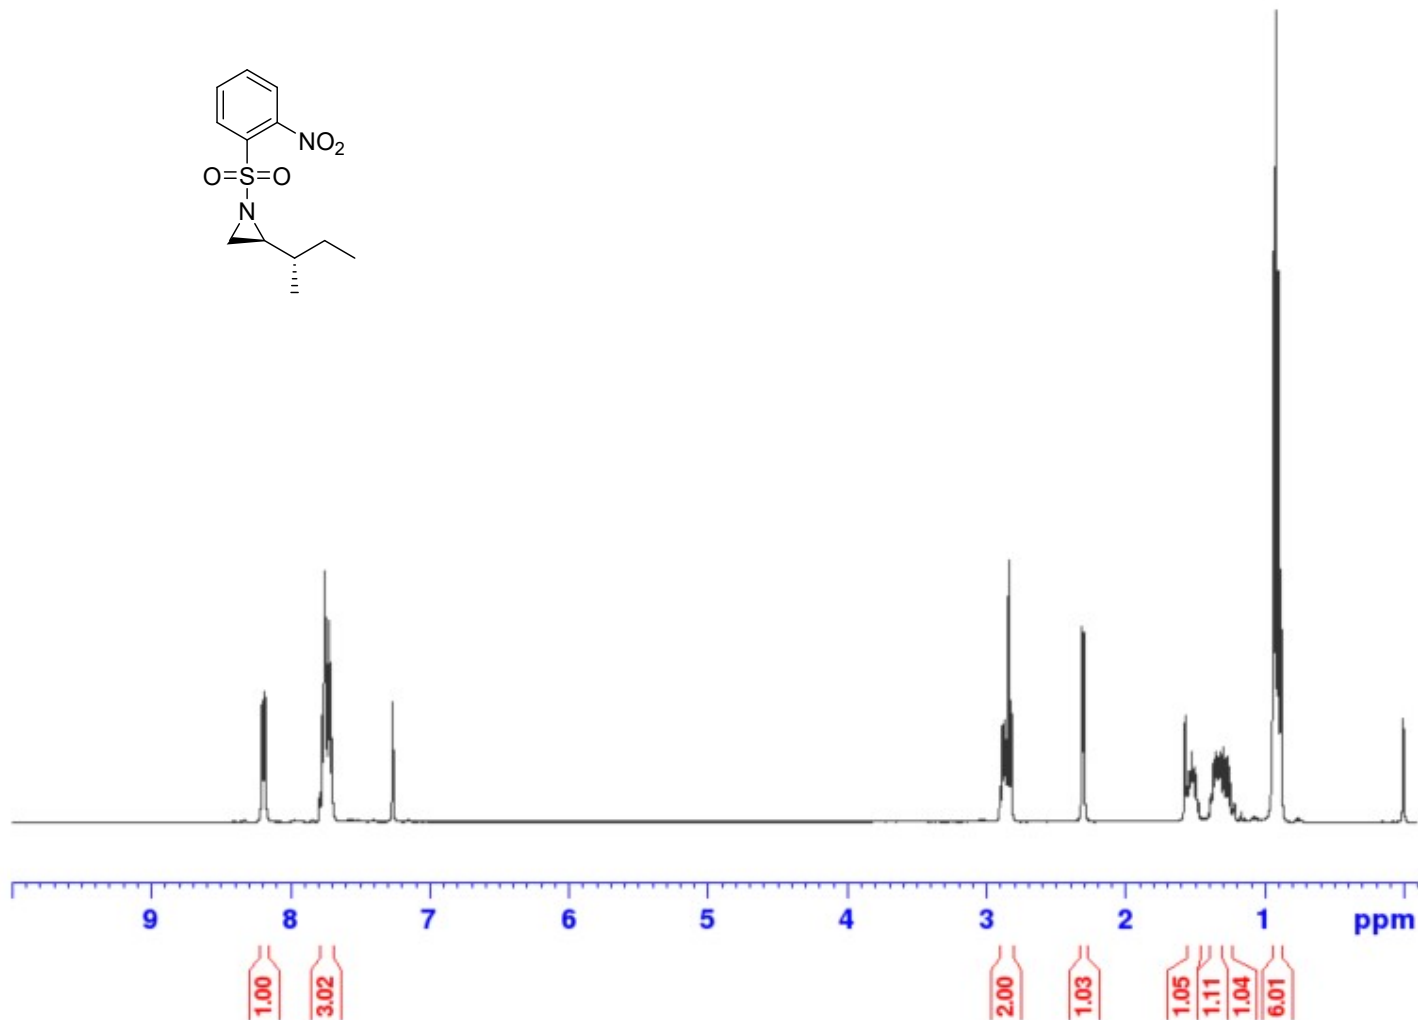

Current Data Parameters  
NAME TW-A-125-A RERUN  
EXPNO 90  
PROCNO 1

F2 - Acquisition Parameters  
Date\_ 20190427  
Time 21.48  
INSTRUM spect  
PROBHD 5 mm PABBO BB/  
PULPROG zg30  
TD 131072  
SOLVENT CDC13  
NS 64  
DS 0  
SWH 12019.230 Hz  
FIDRES 0.091699 Hz  
AQ 5.4525952 sec  
RG 90.5  
DW 41.600 usec  
DE 9.85 usec  
TE 300.0 K  
D1 0.10000000 sec  
TDO 1

S1  
<sup>13</sup>C NMR  
 101 MHz  
 CDCl<sub>3</sub>

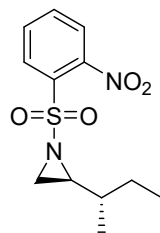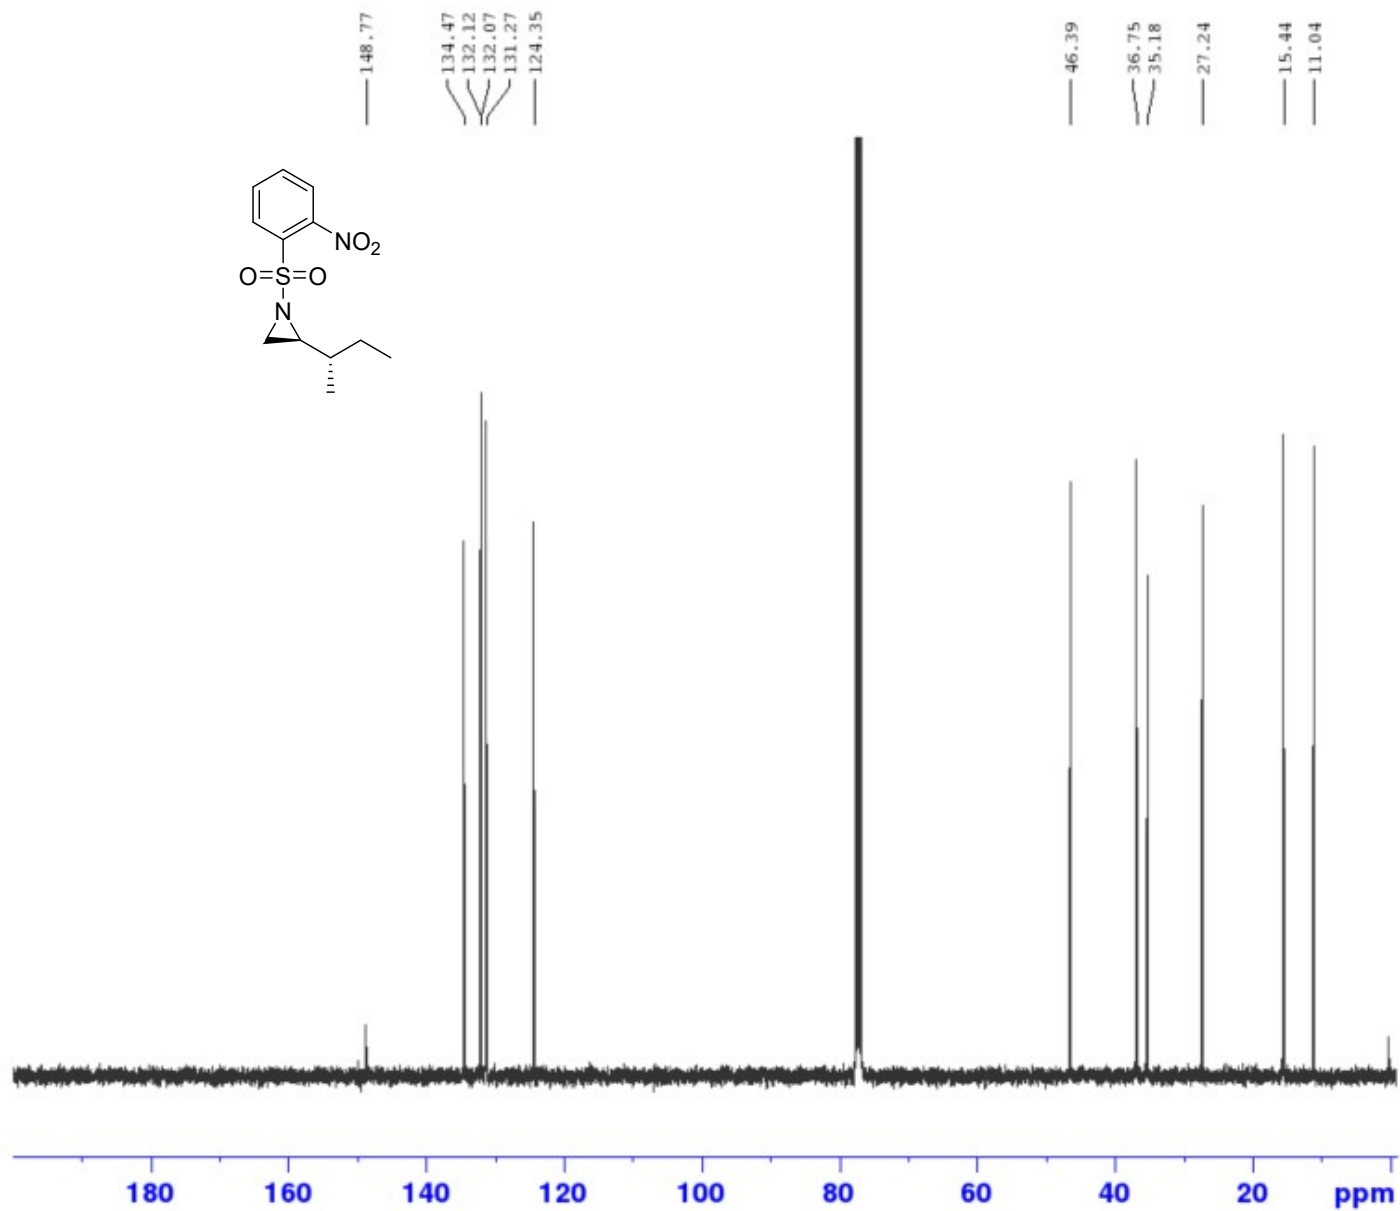

Current Data Parameters  
 NAME TW-A-125-A RERUN  
 EXPNO 92  
 PROCNO 1

F2 - Acquisition Parameters  
 Date\_ 20190428  
 Time 4.32  
 INSTRUM spect  
 PROBHD 5 mm PABBO BB/  
 PULPROG zgpg30  
 TD 65536  
 SOLVENT CDCl3  
 NS 1024  
 DS 4  
 SWH 24038.461 Hz  
 FIDRES 0.366798 Hz  
 AQ 1.3631488 sec  
 RG 181  
 DW 20.800 usec  
 DE 6.50 usec  
 TE 300.0 K  
 D1 2.00000000 sec  
 D11 0.03000000 sec  
 TDO 1

===== CHANNEL f1 =====  
 SFO1 100.5649900 MHz  
 NUC1 13C  
 P1 10.00 usec  
 PLW1 44.46300125 W

===== CHANNEL f2 =====  
 SFO2 399.9015996 MHz  
 NUC2 1H  
 CPDPRG[2] waltz16  
 PCPD2 90.00 usec  
 PLW2 7.59999990 W  
 PLW12 0.20774999 W  
 PLW13 0.16827001 W

F2 - Processing parameters  
 SI 32768  
 SF 100.5549220 MHz  
 WDW EM  
 SSB 0  
 LB 1.00 Hz  
 GB 0  
 PC 1.40

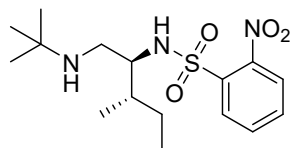

S2  
<sup>1</sup>H NMR  
 400 MHz  
 CDCl<sub>3</sub>

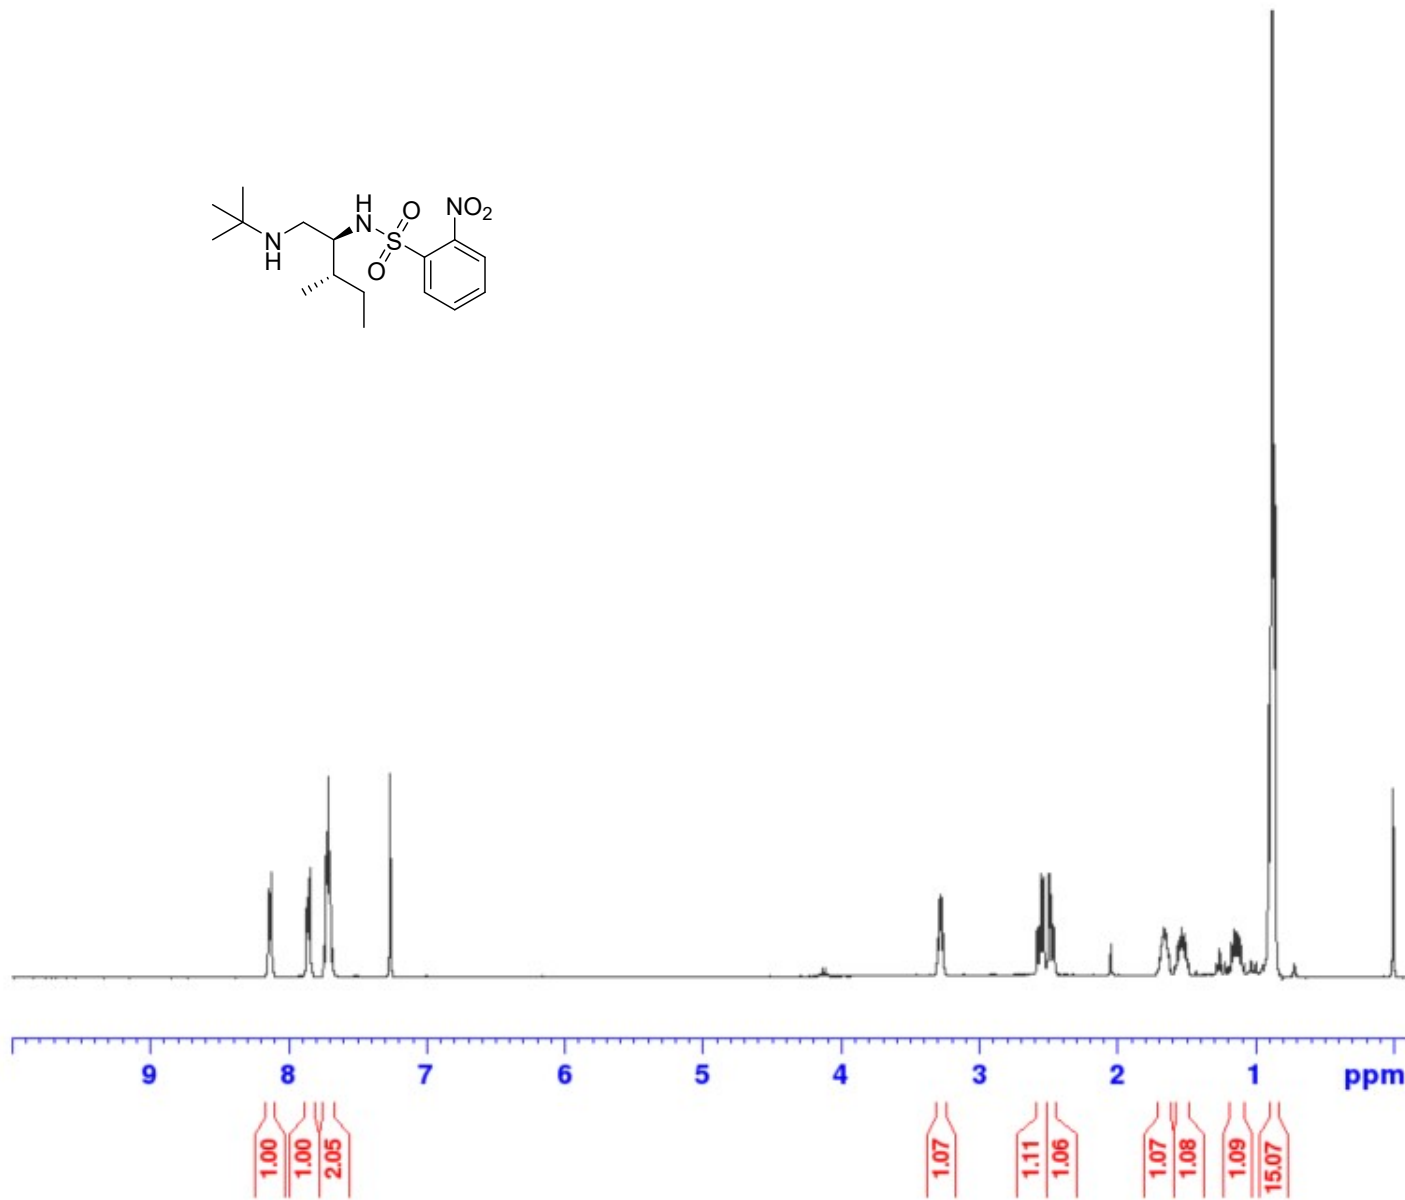

```

Current Data Parameters
NAME      TW-A-197-A RERUN
EXPNO     10
PROCNO    1

F2 - Acquisition Parameters
Date_     20190430
Time      20.53
INSTRUM   spect
PROBHD    5 mm PABBO BB/
PULPROG   zg30
TD        131072
SOLVENT   CDC13
NS        64
DS        0
SWH       12019.230 Hz
FIDRES    0.091699 Hz
AQ        5.4525952 sec
RG        101
DW        41.600 usec
DE        9.85 usec
TE        300.0 K
D1        0.10000000 sec
TDO       1

----- CHANNEL f1 -----
SFO1     399.9024695 MHz
NUC1      1H
P1       14.88 usec
PLW1     7.599999990 W

F2 - Processing parameters
SI       131072
SF       399.9000085 MHz
WDW      EM
SSB      0
LB       0.10 Hz
GB       0
PC       1.00
  
```

S2  
<sup>13</sup>C NMR  
 101 MHz  
 CDCl<sub>3</sub>

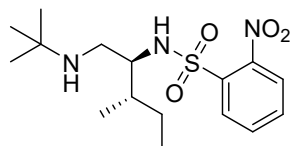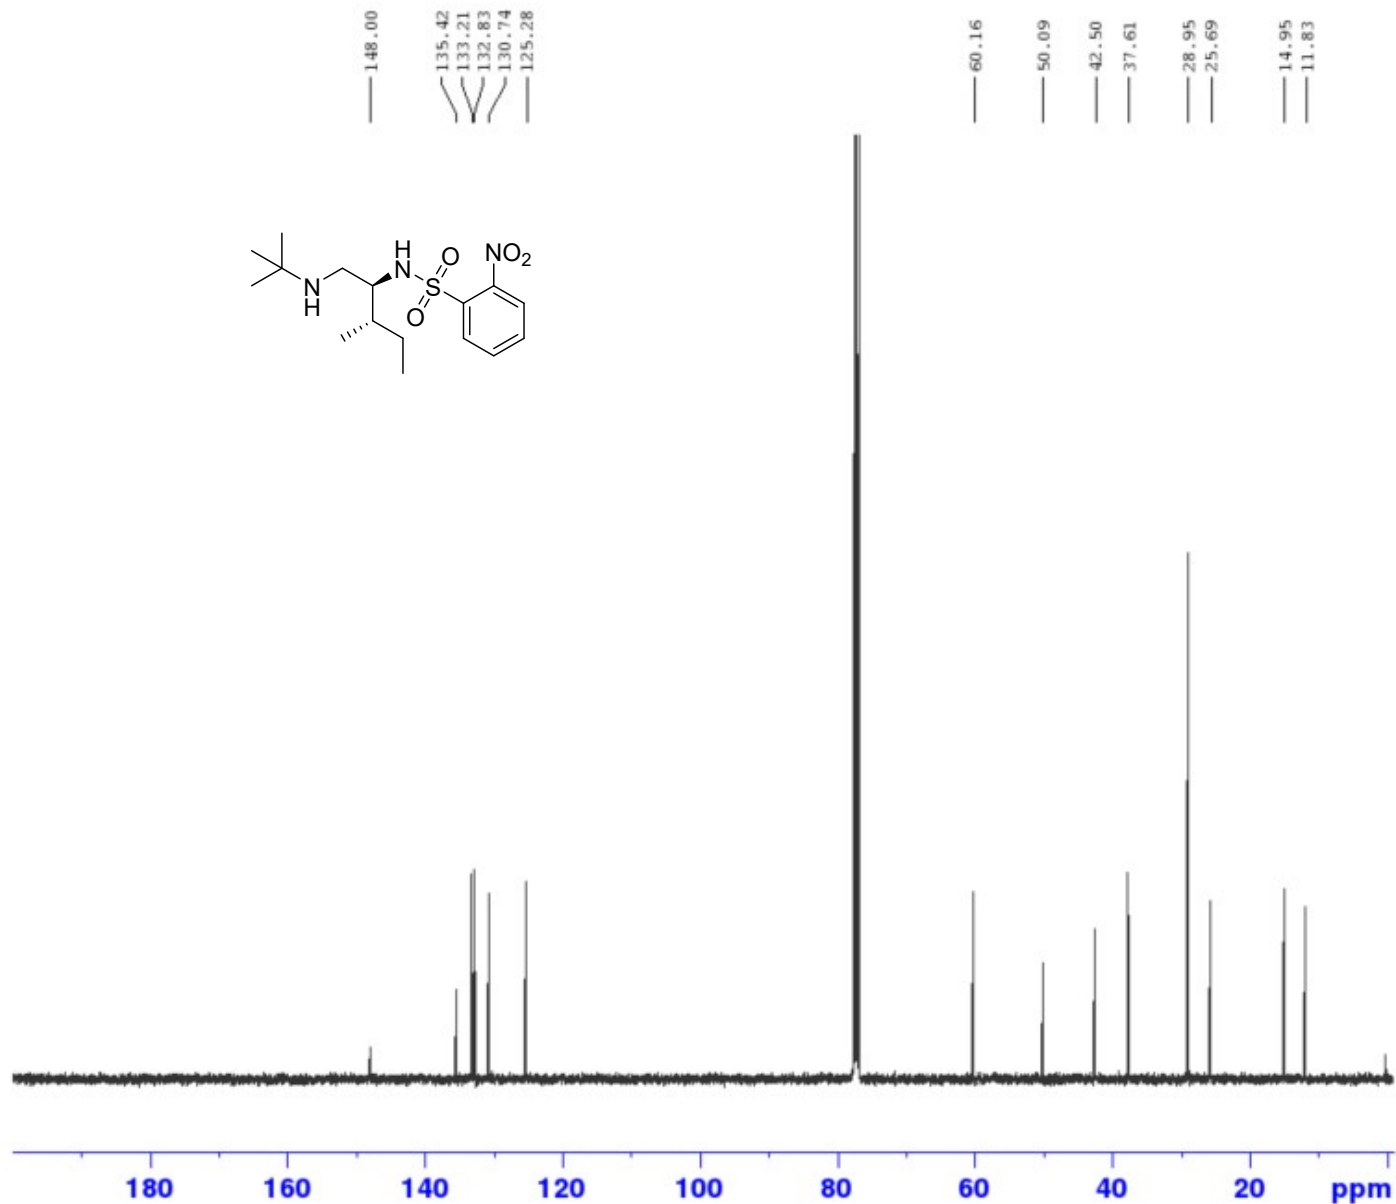

Current Data Parameters  
 NAME TW-A-197-A RERUN  
 EXPNO 12  
 PROCNO 1

F2 - Acquisition Parameters  
 Date\_ 20190430  
 Time 21.54  
 INSTRUM spect  
 PROBHD 5 mm PABBO BB/  
 PULPROG zgpg30  
 TD 65536  
 SOLVENT CDC13  
 NS 1024  
 DS 4  
 SWH 24038.461 Hz  
 FIDRES 0.366798 Hz  
 AQ 1.3631488 sec  
 RG 181  
 DW 20.800 usec  
 DE 6.50 usec  
 TE 300.0 K  
 D1 2.00000000 sec  
 D11 0.03000000 sec  
 TDO 1

===== CHANNEL f1 =====  
 SFO1 100.5649900 MHz  
 NUC1 13C  
 P1 10.00 usec  
 PLW1 44.46300125 W

===== CHANNEL f2 =====  
 SFO2 399.9015996 MHz  
 NUC2 1H  
 CPDPRG[2] waltz16  
 PCPD2 90.00 usec  
 PLW2 7.59999990 W  
 PLW12 0.20774999 W  
 PLW13 0.16827001 W

F2 - Processing parameters  
 SI 32768  
 SF 100.5549213 MHz  
 WDW EM  
 SSB 0  
 LB 1.00 Hz  
 GB 0  
 PC 1.40

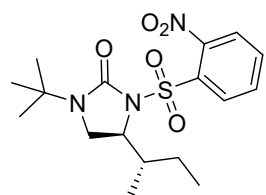

**S3**  
<sup>1</sup>H NMR  
 400 MHz  
 CDCl<sub>3</sub>

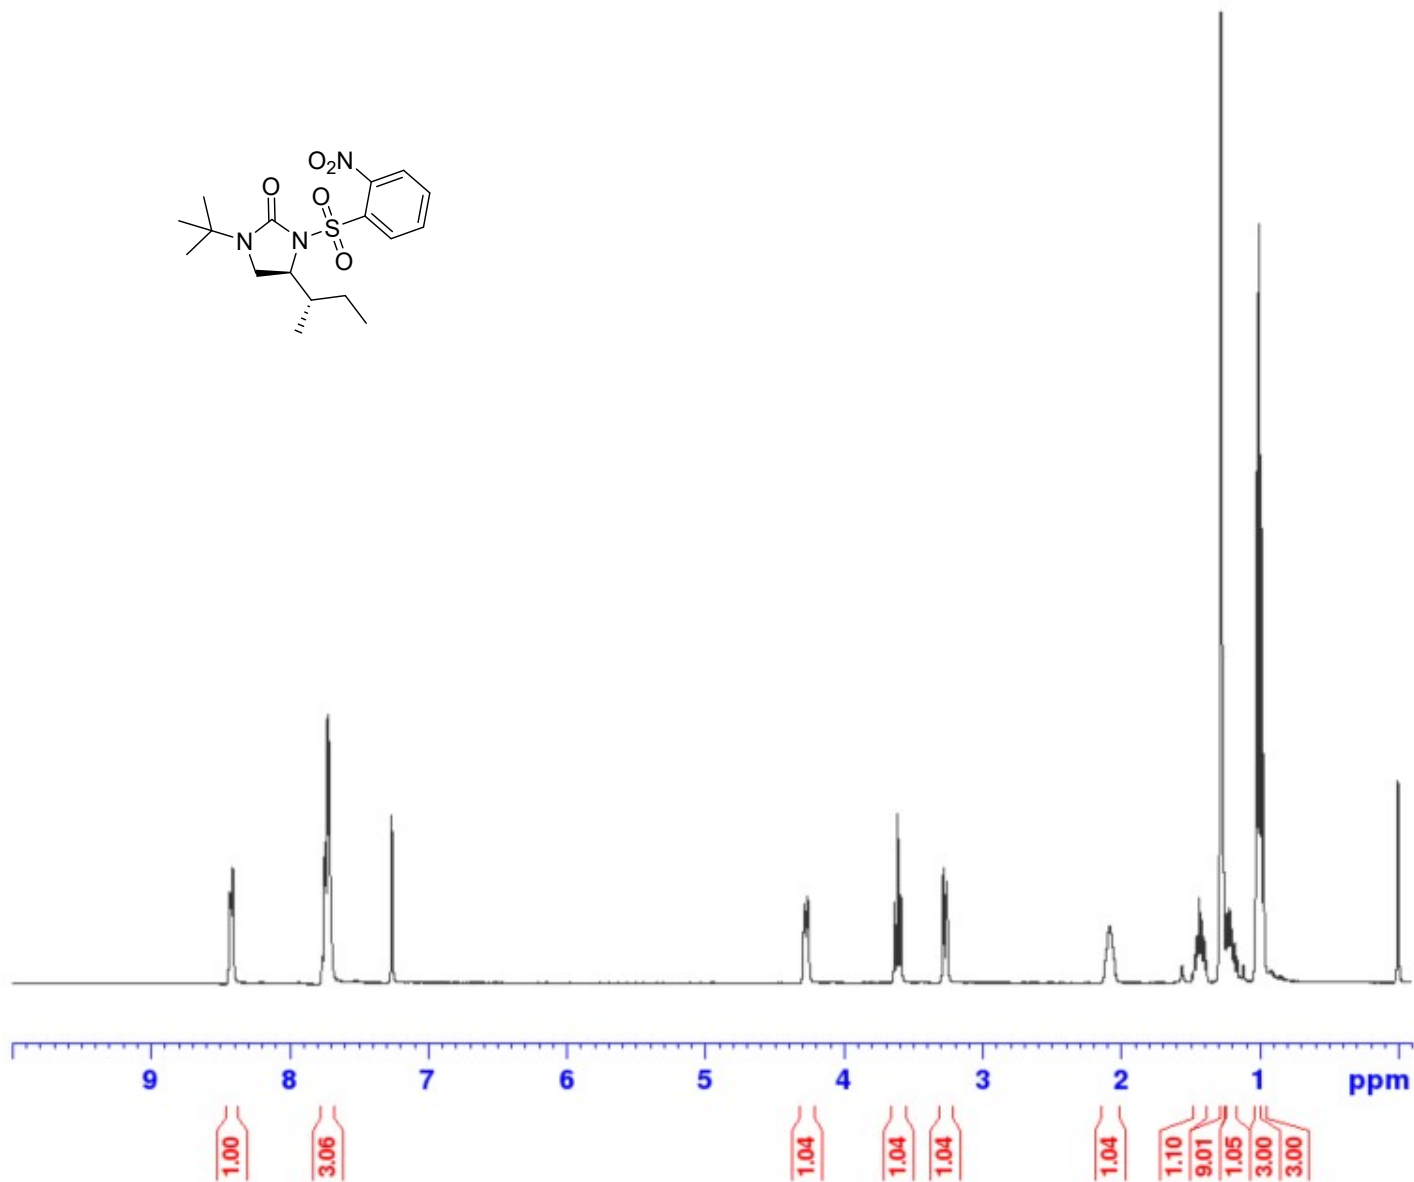

Current Data Parameters  
 NAME TW-A-130-A  
 EXPNO 50  
 PROCNO 1

F2 - Acquisition Parameters  
 Date\_ 20190427  
 Time 17.09  
 INSTRUM spect  
 PROBHD 5 mm PABBO BB/  
 PULPROG zg30  
 TD 131072  
 SOLVENT CDCl3  
 NS 64  
 DS 0  
 SMH 12019.230 Hz  
 FIDRES 0.091699 Hz  
 AQ 5.4525952 sec  
 RG 101  
 DW 41.600 usec  
 DE 9.85 usec  
 TE 300.0 K  
 D1 0.10000000 sec  
 TDO 1

----- CHANNEL f1 -----  
 SFO1 399.9024695 MHz  
 NUC1 1H  
 P1 14.88 usec  
 PLW1 7.59999990 W

F2 - Processing parameters  
 SI 131072  
 SF 399.9000095 MHz  
 WDW EM  
 SSB 0  
 LB 0.10 Hz  
 GB 0  
 PC 1.00



S3  
<sup>13</sup>C NMR  
 101 MHz  
 CDCl<sub>3</sub>

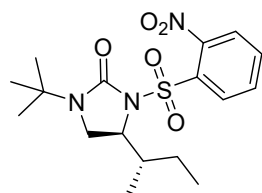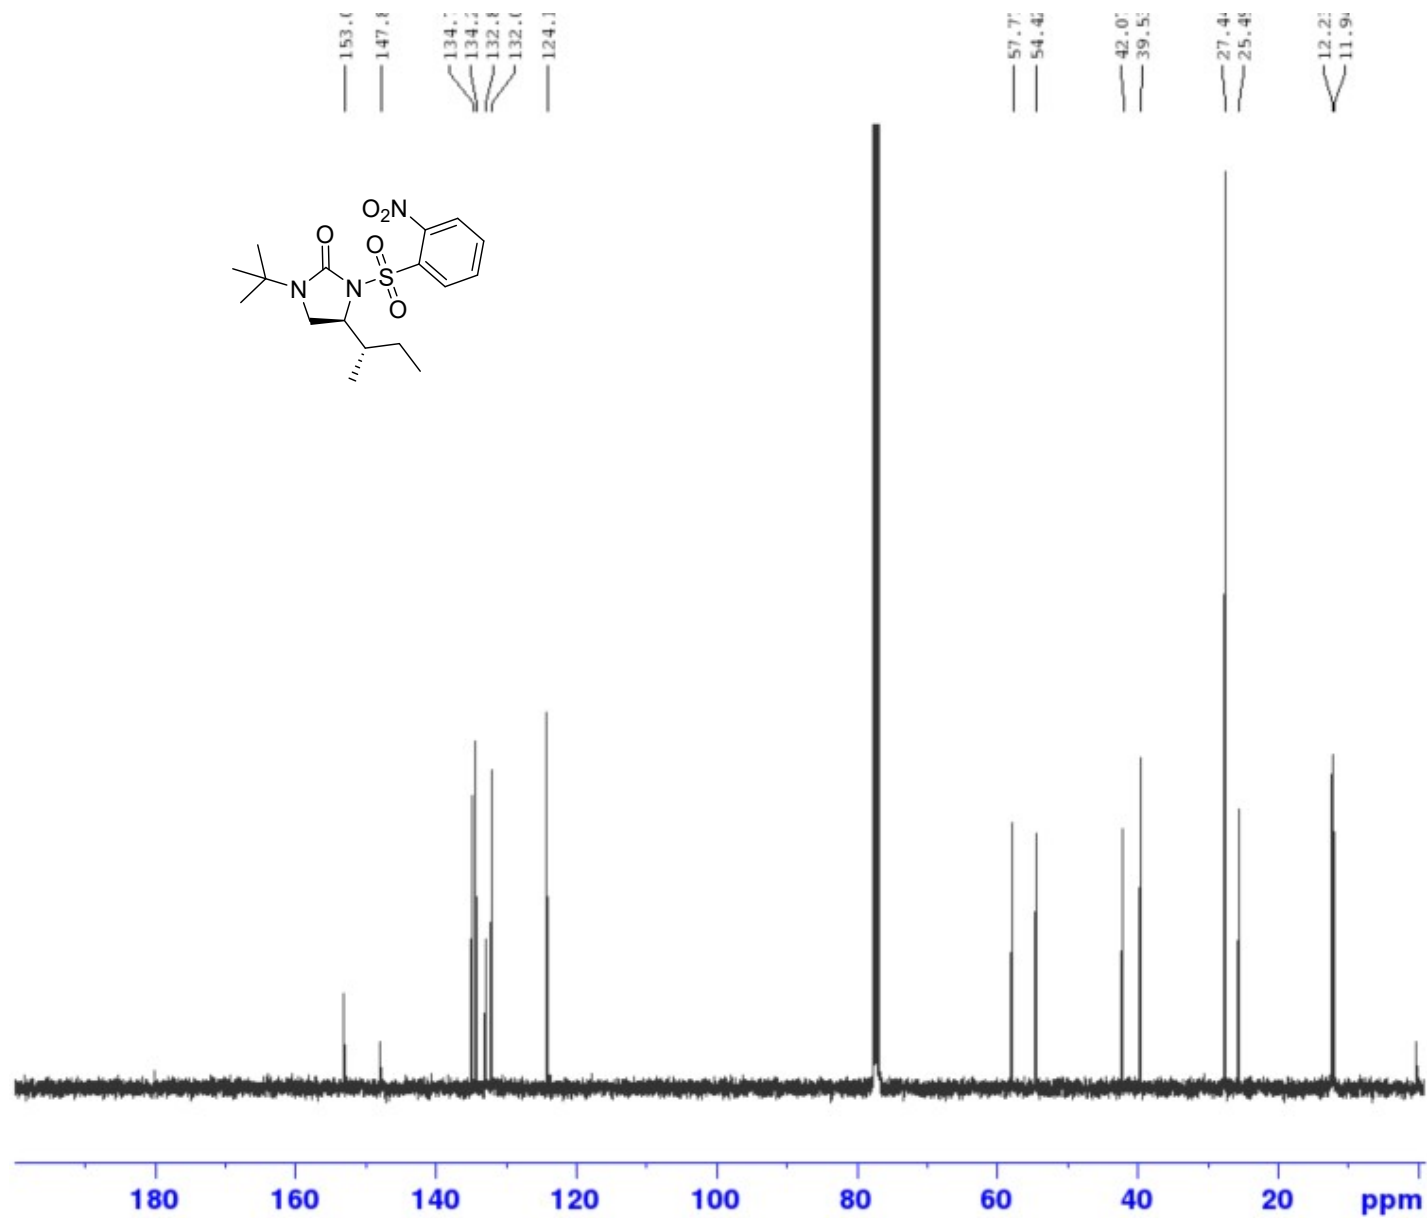

Current Data Parameters  
 NAME TW-A-130-A  
 EXPNO 52  
 PROCNO 1

F2 - Acquisition Parameters  
 Date\_ 20190428  
 Time 20.29  
 INSTRUM spect  
 PROBHD 5 mm PABBO BB/  
 PULPROG zgpg30  
 TD 65536  
 SOLVENT CDCl3  
 NS 1024  
 DS 4  
 SWH 24038.461 Hz  
 FIDRES 0.366798 Hz  
 AQ 1.3631488 sec  
 RG 203  
 DW 20.800 usec  
 DE 6.50 usec  
 TE 300.0 K  
 D1 2.00000000 sec  
 D11 0.03000000 sec  
 TDO 1

===== CHANNEL f1 =====  
 SFO1 100.5649900 MHz  
 NUC1 13C  
 P1 10.00 usec  
 PLW1 44.46300125 W

===== CHANNEL f2 =====  
 SFO2 399.9015996 MHz  
 NUC2 1H  
 CPDPRG[2] waltz16  
 PCPD2 90.00 usec  
 PLW2 7.59999990 W  
 PLW12 0.20774999 W  
 PLW13 0.16827001 W

F2 - Processing parameters  
 SI 32768  
 SF 100.5549213 MHz  
 WDW EM  
 SSB 0  
 LB 1.00 Hz  
 GB 0  
 PC 1.40

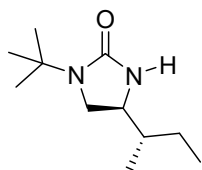

S4  
<sup>1</sup>H NMR  
 600 MHz  
 CDCl<sub>3</sub>

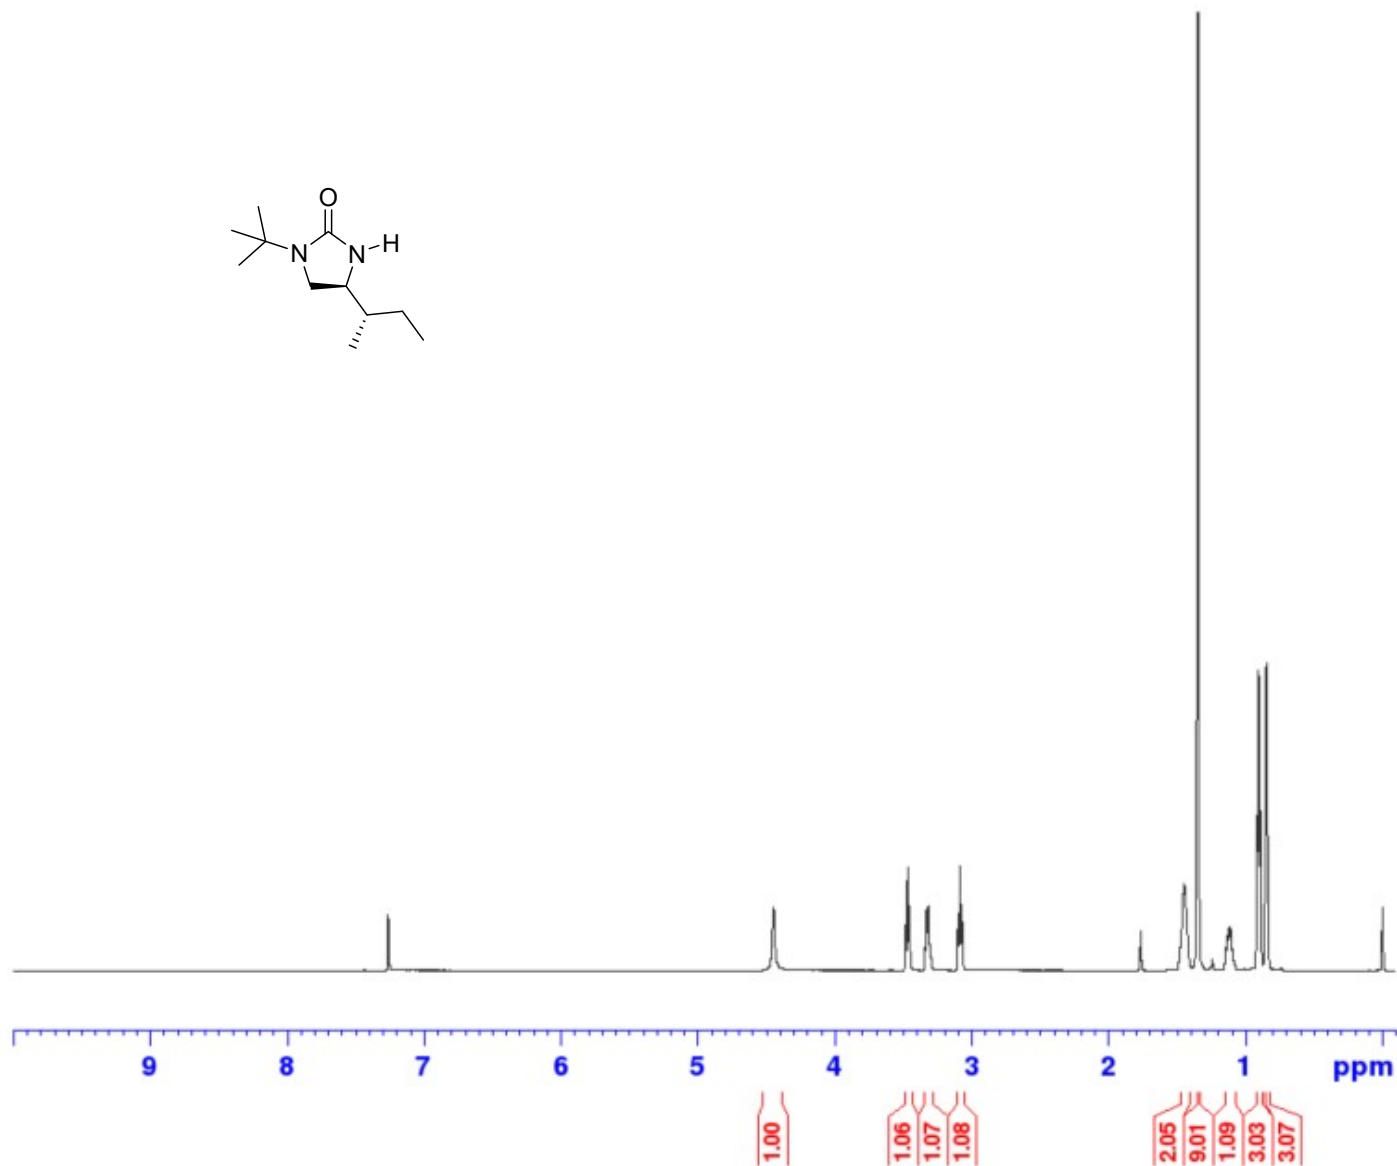

Current Data Parameters  
 NAME TW-A-169-A 600  
 EXPNO 80  
 PROCNO 1

F2 - Acquisition Parameters  
 Date\_ 20190831  
 Time 9.15  
 INSTRUM spect  
 PROBHD 5 mm PABBO BB/  
 PULPROG zg30  
 TD 65536  
 SOLVENT CDCl3  
 NS 16  
 DS 2  
 SWH 12019.230 Hz  
 FIDRES 0.183399 Hz  
 AQ 2.7262976 sec  
 RG 83.95  
 DW 41.600 usec  
 DE 6.50 usec  
 TE 300.0 K  
 D1 1.00000000 sec  
 TDO 1

----- CHANNEL f1 -----  
 SFO1 600.1337060 MHz  
 NUC1 1H  
 P1 10.00 usec  
 PLW1 26.60000038 W

F2 - Processing parameters  
 SI 65536  
 SF 600.1300145 MHz  
 WDW EM  
 SSB 0  
 LB 0.30 Hz  
 GB 0  
 PC 1.00

S4  
<sup>13</sup>C NMR  
151 MHz  
CDCl<sub>3</sub>

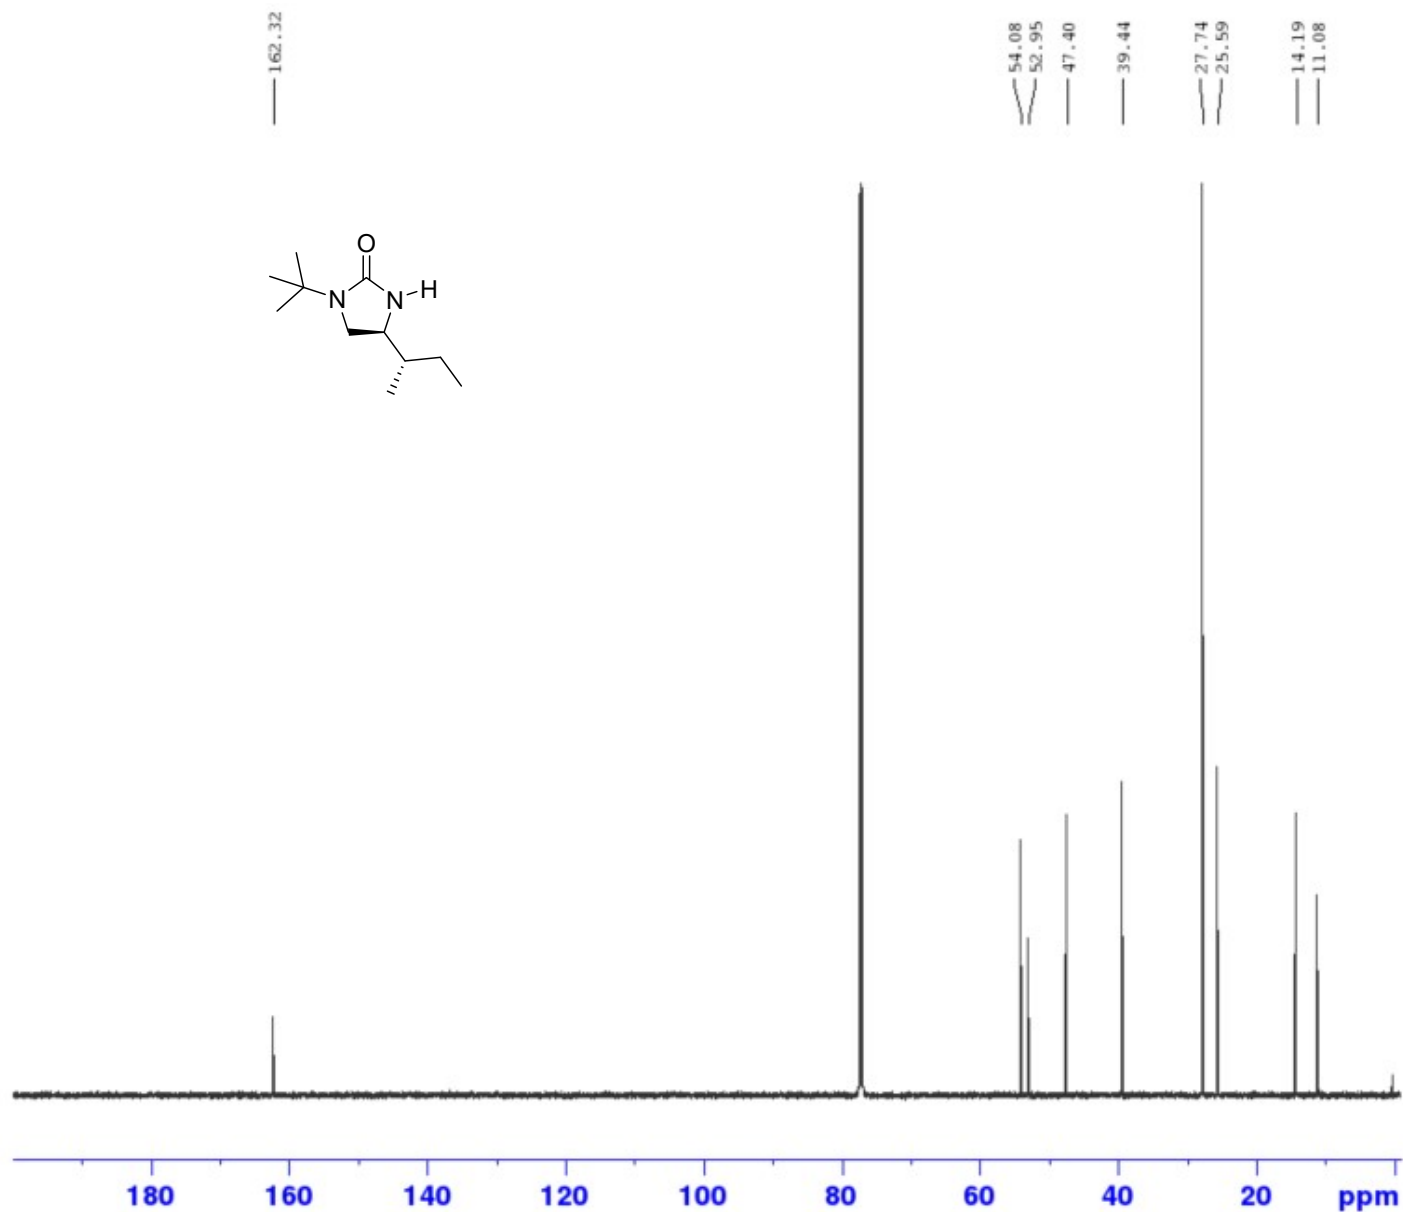

Current Data Parameters  
NAME TW-A-169-A 600  
EXPNO 82  
PROCNO 1

F2 - Acquisition Parameters  
Date\_ 20190831  
Time 10.06  
INSTRUM spect  
PROBHD 5 mm PABBO BB/  
PULPROG zgpg30  
TD 65536  
SOLVENT CDC13  
NS 1024  
DS 4  
SWH 36057.691 Hz  
FIDRES 0.550197 Hz  
AQ 0.9087659 sec  
RG 186.92  
DW 13.867 usec  
DE 6.50 usec  
TE 300.0 K  
D1 2.00000000 sec  
D11 0.03000000 sec  
TDO 1

===== CHANNEL f1 =====  
SFO1 150.9178981 MHz  
NUC1 13C  
P1 11.80 usec  
PLW1 85.00000000 W

===== CHANNEL f2 =====  
SFO2 600.1324005 MHz  
NUC2 1H  
CPDPRG[2] waltz16  
PCPD2 80.00 usec  
PLW2 27.00000000 W  
PLW12 0.43891999 W  
PLW13 0.28090999 W

F2 - Processing parameters  
SI 32768  
SF 150.9027883 MHz  
WDW EM  
SSB 0  
LB 1.00 Hz  
GB 0  
PC 1.40

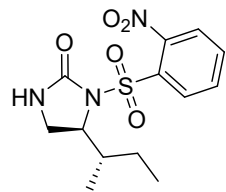

Current Data Parameters  
 NAME TW-A-168-A COSY1  
 EXPNO 10  
 PROCNO 1

F2 - Acquisition Parameters  
 Date\_ 20190828  
 Time 16.41  
 INSTRUM spect  
 PROBHD 5 mm PABBO BB/  
 PULPROG zg30  
 TD 131072  
 SOLVENT CDC13  
 NS 16  
 DS 0  
 SWH 12019.230 Hz  
 FIDRES 0.091699 Hz  
 AQ 5.4525952 sec  
 RG 203  
 DW 41.600 usec  
 DE 9.85 usec  
 TE 299.7 K  
 D1 0.10000000 sec  
 TDO 1

S5  
<sup>1</sup>H NMR  
 400 MHz  
 CDCl<sub>3</sub>

----- CHANNEL f1 -----  
 SF01 399.9024695 MHz  
 NUC1 1H  
 P1 14.88 usec  
 PLW1 7.59999990 W

F2 - Processing parameters  
 SI 131072  
 SF 399.9000095 MHz  
 WDW EM  
 SSB 0  
 LB 0.10 Hz  
 GB 0  
 PC 1.00

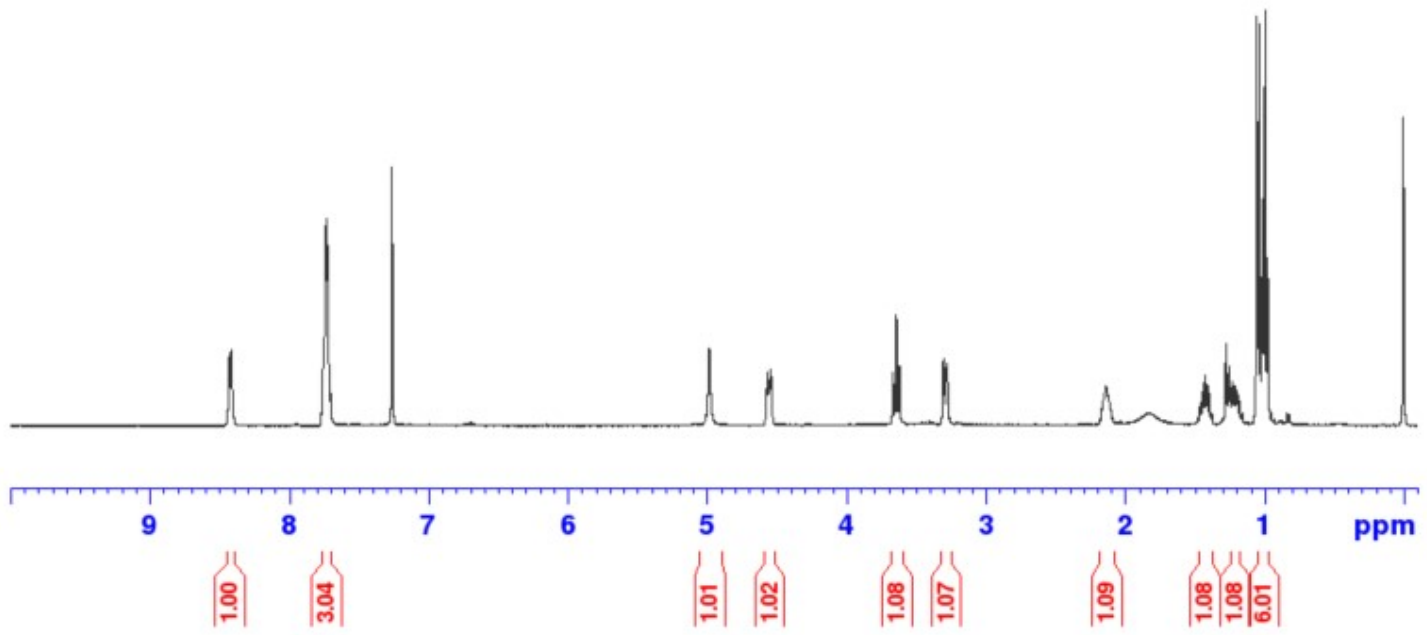

S5  
<sup>13</sup>C NMR  
 151 MHz  
 CDCl<sub>3</sub>

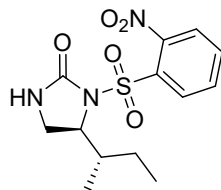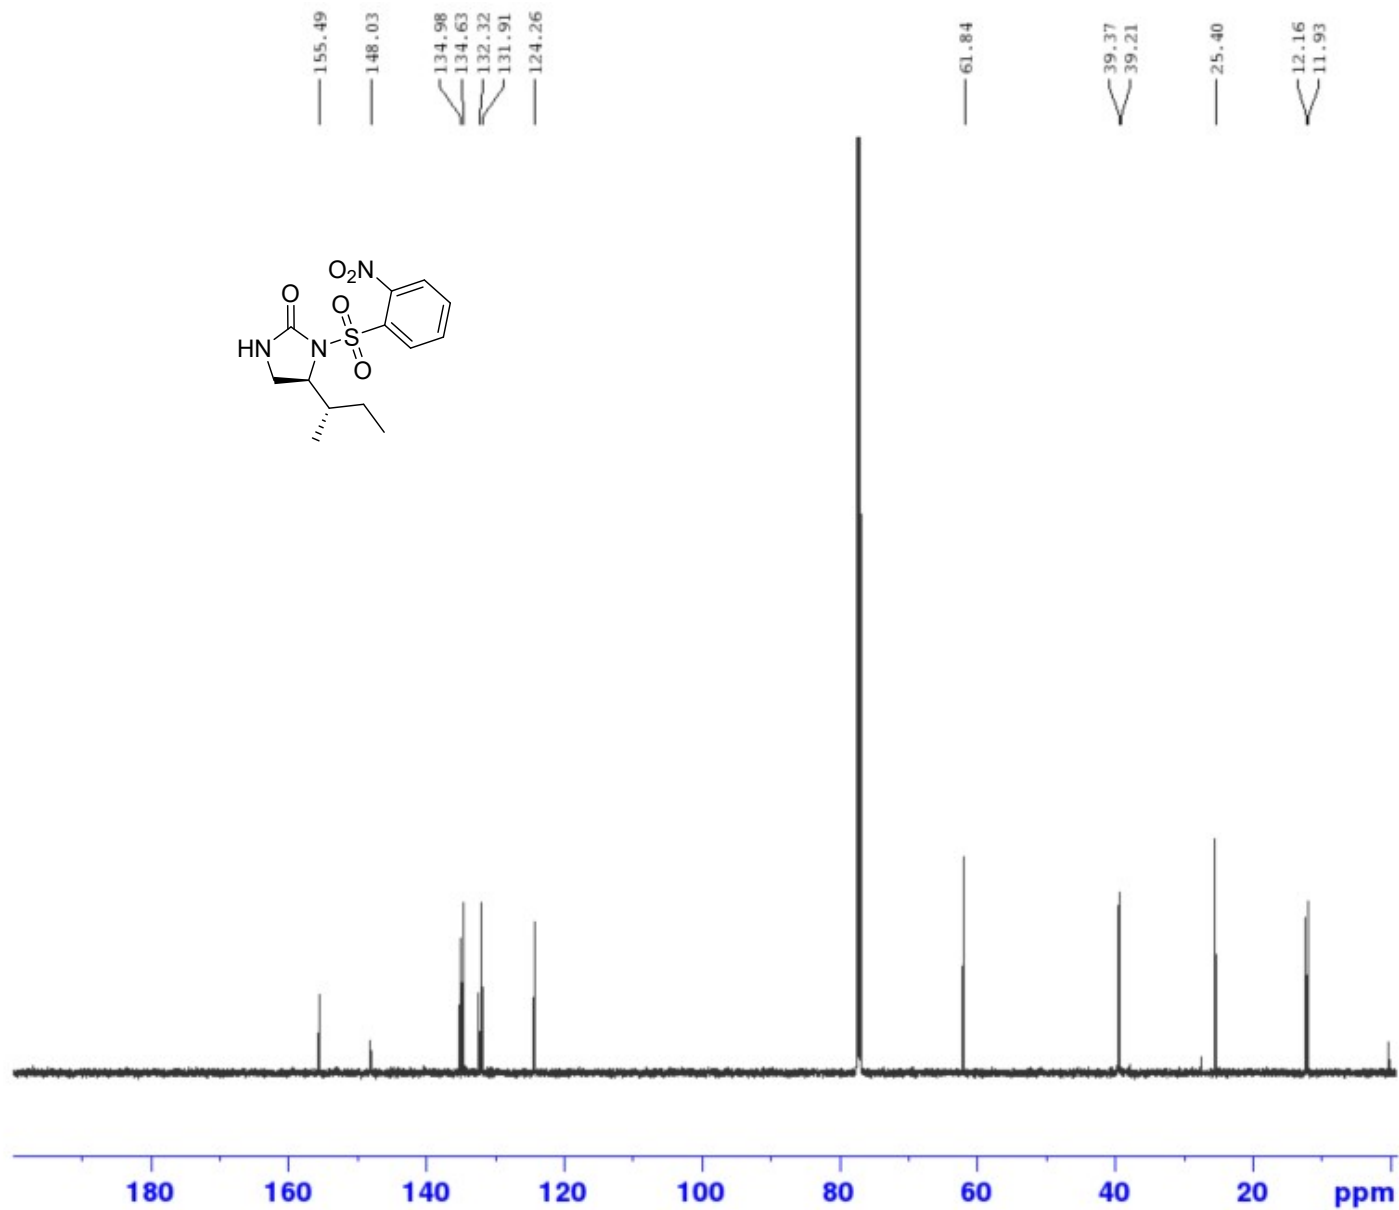

```

Current Data Parameters
NAME          TW-A-168-A
EXPNO         11
PROCNO        1

F2 - Acquisition Parameters
Date_         20190906
Time          11.59
INSTRUM       spect
PROBHD        5 mm PABBO BB/
PULPROG       zgpg30
TD            65536
SOLVENT       CDC13
NS            1024
DS            4
SWH           36057.691 Hz
FIDRES        0.550197 Hz
AQ            0.9087659 sec
RG            186.92
DW            13.867 usec
DE            6.50 usec
TE            300.0 K
D1            2.00000000 sec
D11           0.03000000 sec
TDO           1

===== CHANNEL f1 =====
SFO1          150.9178981 MHz
NUC1           13C
P1            11.80 usec
PLW1          85.00000000 W

===== CHANNEL f2 =====
SFO2          600.1324005 MHz
NUC2           1H
CPDPRG[2]     waltz16
PCPD2         80.00 usec
PLW2          27.00000000 W
PLW12         0.43891999 W
PLW13         0.28090999 W

F2 - Processing parameters
SI            32768
SF            150.9028085 MHz
WDW           EM
SSB           0
LB            1.00 Hz
GB            0
PC            1.40
  
```

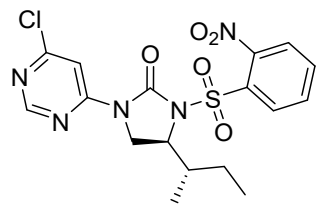

Current Data Parameters  
 NAME TW-B-215  
 EXPNO 10  
 PROCNO 1

F2 - Acquisition Parameters  
 Date\_ 20190905  
 Time 19.05  
 INSTRUM spect  
 PROBHD 5 mm PABBO BB/  
 PULPROG zg30  
 TD 65536  
 SOLVENT CDC13  
 NS 16  
 DS 2  
 SWH 12019.230 Hz  
 FIDRES 0.183399 Hz  
 AQ 2.7262976 sec  
 RG 148.05  
 DW 41.600 usec  
 DE 6.50 usec  
 TE 300.0 K  
 D1 1.00000000 sec  
 TDO 1

----- CHANNEL f1 -----  
 SFO1 600.1337060 MHz  
 NUC1 1H  
 P1 10.00 usec  
 PLW1 26.60000038 W

F2 - Processing parameters  
 SI 65536  
 SF 600.1300149 MHz  
 WDW EM  
 SSB 0  
 LB 0.30 Hz  
 GB 0  
 PC 1.00

S6  
<sup>1</sup>H NMR  
 600 MHz  
 CDCl<sub>3</sub>

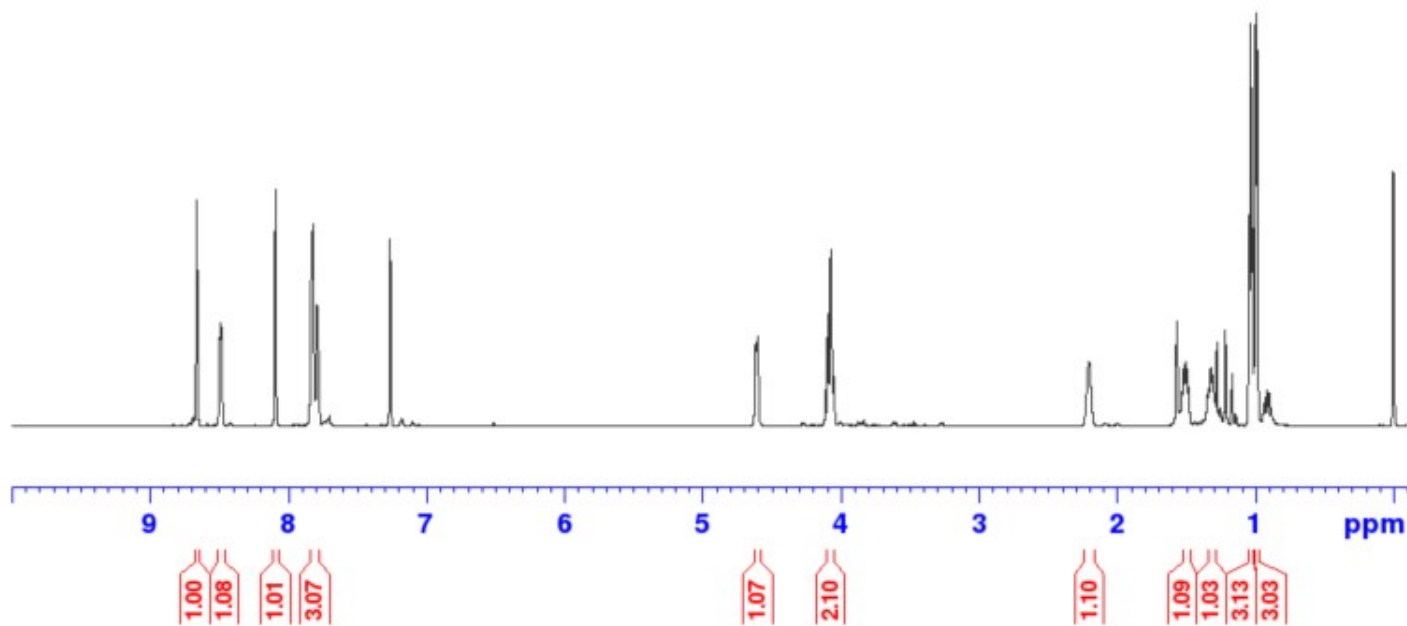

S6  
<sup>13</sup>C NMR  
 151 MHz  
 CDCl<sub>3</sub>

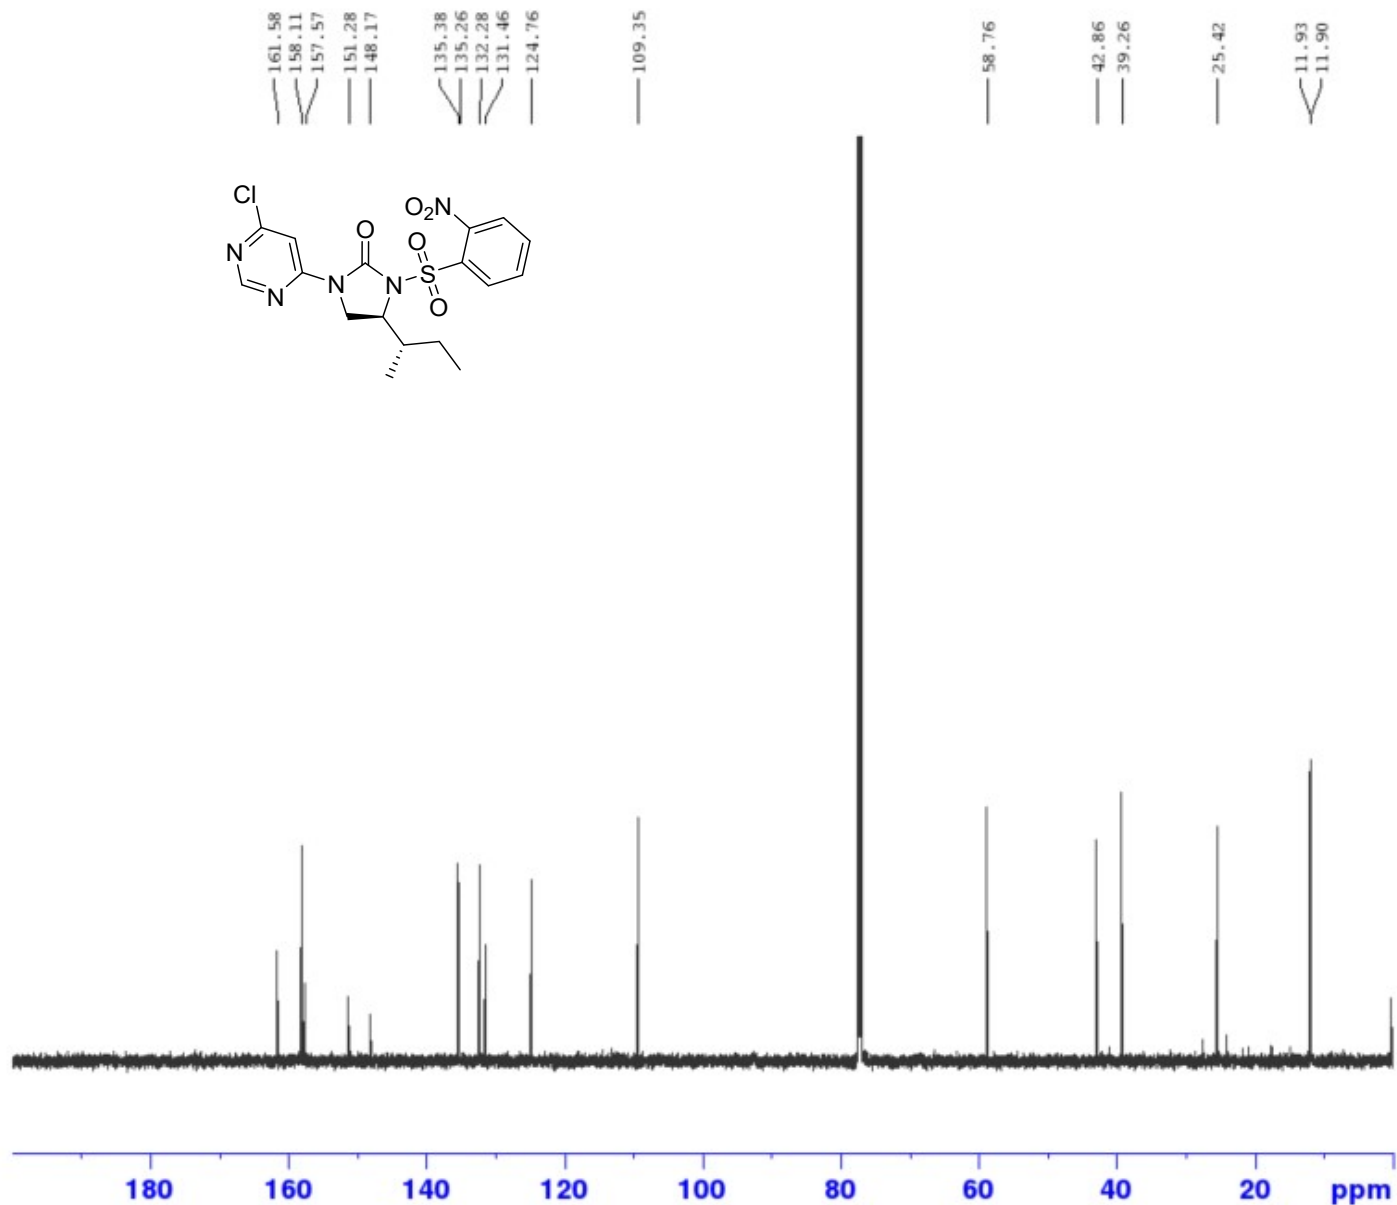

Current Data Parameters  
 NAME TW-B-215  
 EXPNO 11  
 PROCNO 1

F2 - Acquisition Parameters  
 Date\_ 20190905  
 Time 19.57  
 INSTRUM spect  
 PROBHD 5 mm PABBO BB/  
 PULPROG zgpg30  
 TD 65536  
 SOLVENT CDC13  
 NS 1024  
 DS 4  
 SWH 36057.691 Hz  
 FIDRES 0.550197 Hz  
 AQ 0.9087659 sec  
 RG 186.92  
 DW 13.867 usec  
 DE 6.50 usec  
 TE 300.0 K  
 D1 2.00000000 sec  
 D11 0.03000000 sec  
 TDO 1

===== CHANNEL f1 =====  
 SFO1 150.9178981 MHz  
 NUC1 13C  
 P1 11.80 usec  
 PLW1 85.00000000 W

===== CHANNEL f2 =====  
 SFO2 600.1324005 MHz  
 NUC2 1H  
 CPDPRG[2] waltz16  
 PCPD2 80.00 usec  
 PLW2 27.00000000 W  
 PLW12 0.43891999 W  
 PLW13 0.28090999 W

F2 - Processing parameters  
 SI 32768  
 SF 150.9027875 MHz  
 WDW EM  
 SSB 0  
 LB 1.00 Hz  
 GB 0  
 PC 1.40

S7  
1H NMR  
600 MHz  
CDCl<sub>3</sub>

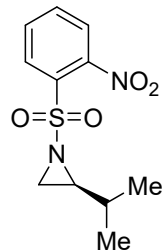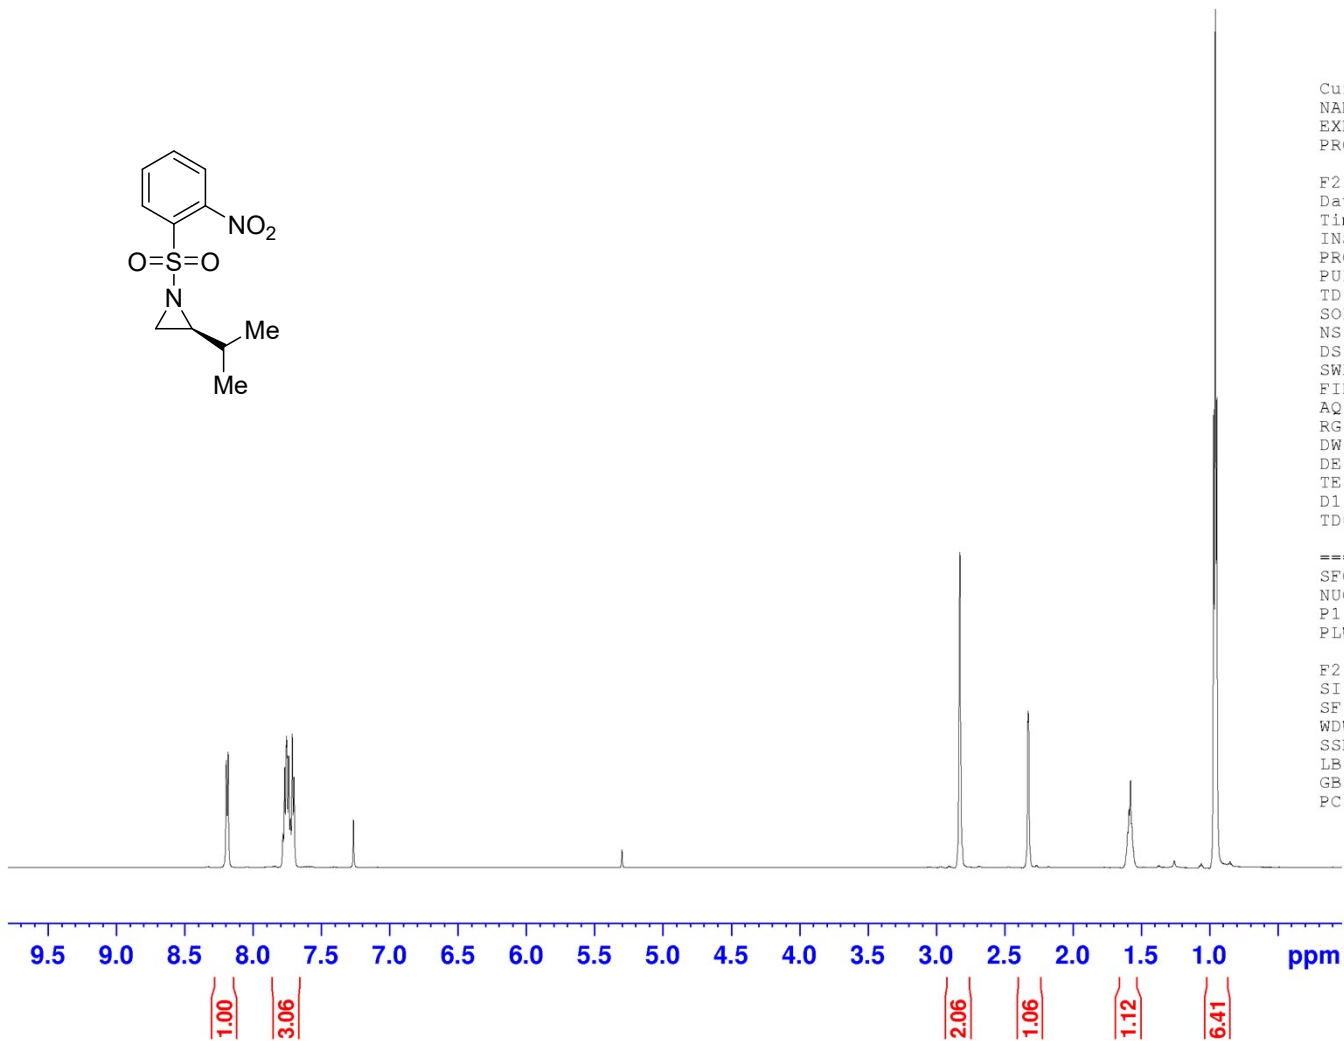

```
Current Data Parameters
NAME      TW-B-203-A 600
EXPNO     10
PROCNO    1

F2 - Acquisition Parameters
Date_     20190911
Time      19.04
INSTRUM   spect
PROBHD    5 mm PABBO BB/
PULPROG   zg30
TD        65536
SOLVENT   CDCl3
NS        16
DS        2
SWH       12019.230 Hz
FIDRES    0.183399 Hz
AQ        2.7262976 sec
RG        74.91
DW        41.600 usec
DE        6.50 usec
TE        300.0 K
D1        1.00000000 sec
TD0       1

===== CHANNEL f1 =====
SFO1      600.1337060 MHz
NUC1      1H
P1        10.00 usec
PLW1      26.60000038 W

F2 - Processing parameters
SI        65536
SF        600.1300112 MHz
WDW       EM
SSB       0
LB        0.30 Hz
GB        0
PC        1.00
```



S7  
13C NMR  
151 MHz  
CDCl<sub>3</sub>

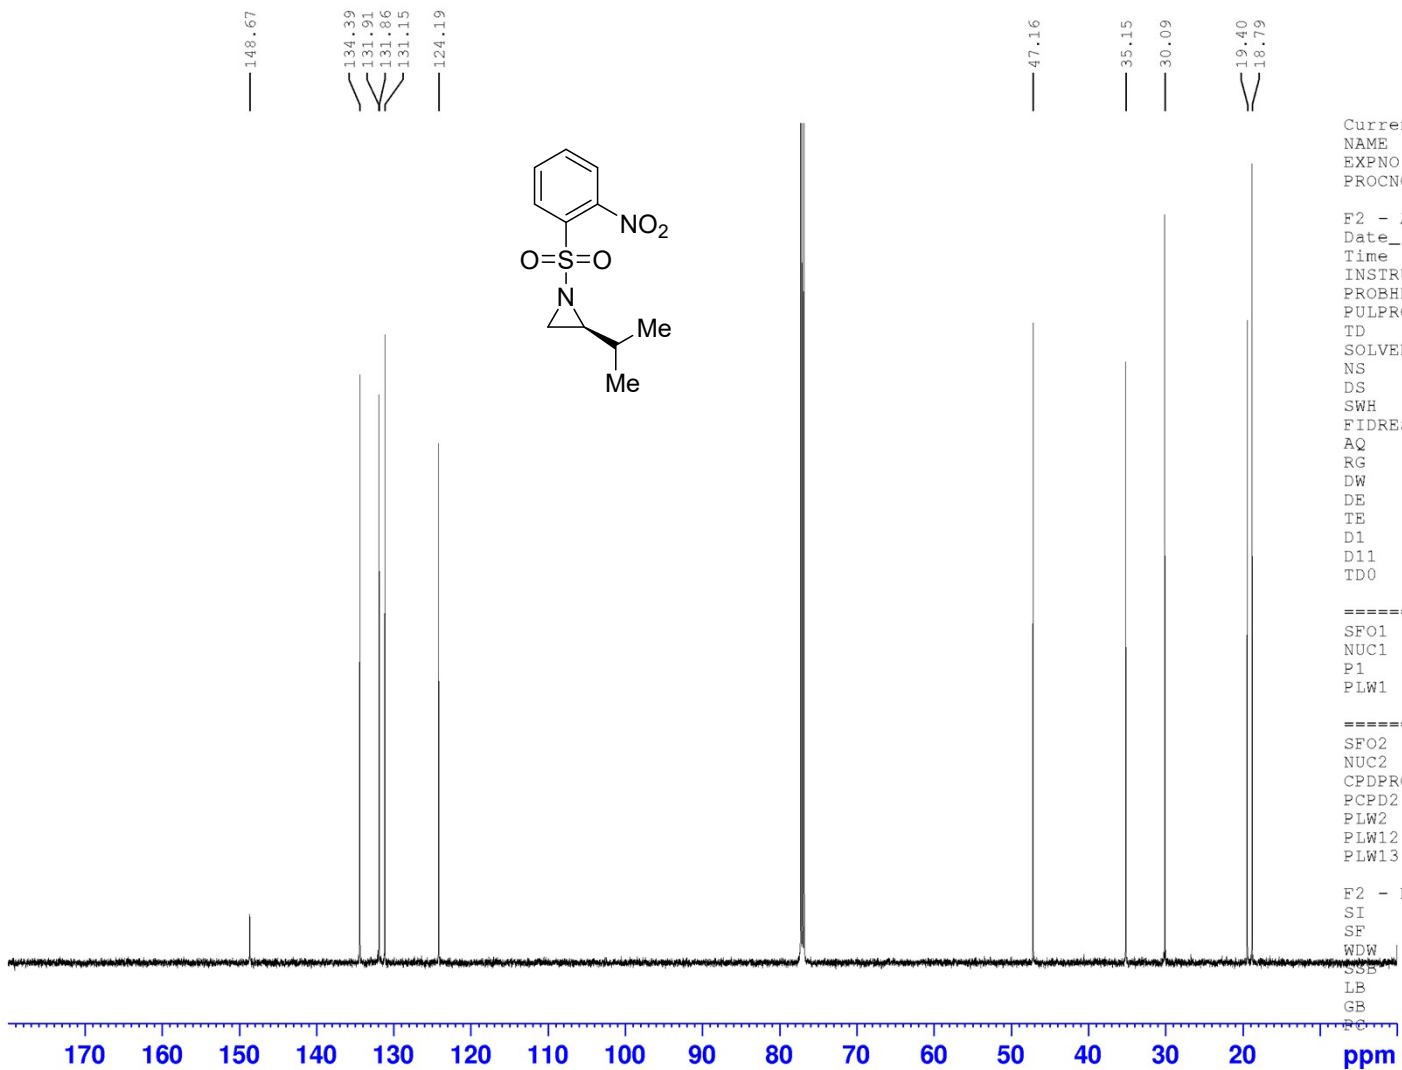

Current Data Parameters  
NAME TW-B-203-A 600  
EXPNO 11  
PROCNO 1

F2 - Acquisition Parameters  
Date\_ 20190911  
Time 19.56  
INSTRUM spect  
PROBHD 5 mm PABBO BB/  
PULPROG zgpg30  
TD 65536  
SOLVENT CDCl3  
NS 1024  
DS 4  
SWH 36057.691 Hz  
FIDRES 0.550197 Hz  
AQ 0.9087659 sec  
RG 186.92  
DW 13.867 usec  
DE 6.50 usec  
TE 300.0 K  
D1 2.00000000 sec  
D11 0.03000000 sec  
TD0 1

==== CHANNEL f1 =====  
SFO1 150.9178981 MHz  
NUC1 13C  
P1 11.80 usec  
PLW1 85.00000000 W

==== CHANNEL f2 =====  
SFO2 600.1324005 MHz  
NUC2 1H  
CPDPRG[2] waltz16  
PCPD2 80.00 usec  
PLW2 27.00000000 W  
PLW12 0.43891999 W  
PLW13 0.28090999 W

F2 - Processing parameters  
SI 32768  
SF 150.9028085 MHz  
WDW EM  
SSB 0  
LB 1.00 Hz  
GB 0  
GC 1.40

S8  
1H NMR  
600 MHz  
CDCl<sub>3</sub>

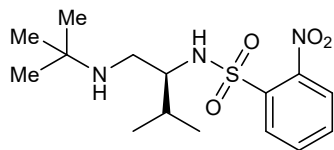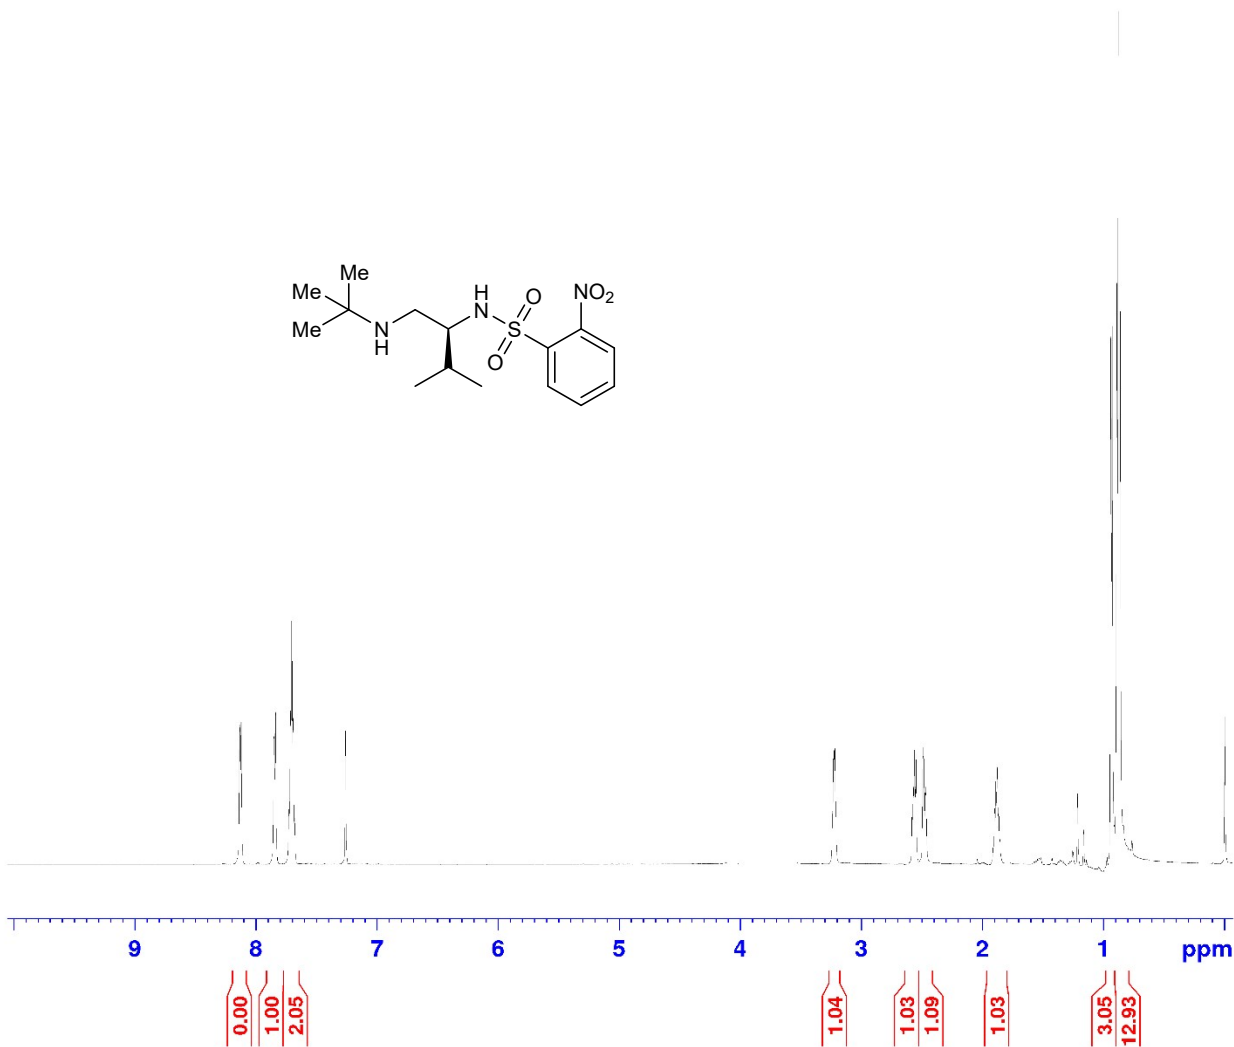

Current Data Parameters  
NAME TW-A-122-B new  
EXPNO 10  
PROCNO 1

F2 - Acquisition Parameters  
Date\_ 20190830  
Time 16.21  
INSTRUM spect  
PROBHD 5 mm PABBO BB/  
PULPROG zg30  
TD 65536  
SOLVENT CDCl3  
NS 16  
DS 2  
SWH 12019.230 Hz  
FIDRES 0.183399 Hz  
AQ 2.7262976 sec  
RG 97.5  
DW 41.600 usec  
DE 6.50 usec  
TE 300.0 K  
D1 1.00000000 sec  
TDO 1

==== CHANNEL f1 =====  
SFO1 600.1337060 MHz  
NUC1 1H  
P1 10.00 usec  
PLW1 26.60000038 W

F2 - Processing parameters  
SI 65536  
SF 600.1300150 MHz  
WDW EM  
SSB 0  
LB 0.30 Hz  
GB 0  
PC 1.00

S8  
13C NMR  
151 MHz  
CDCl3

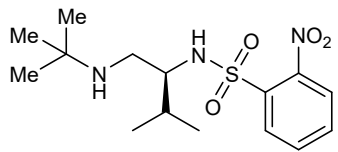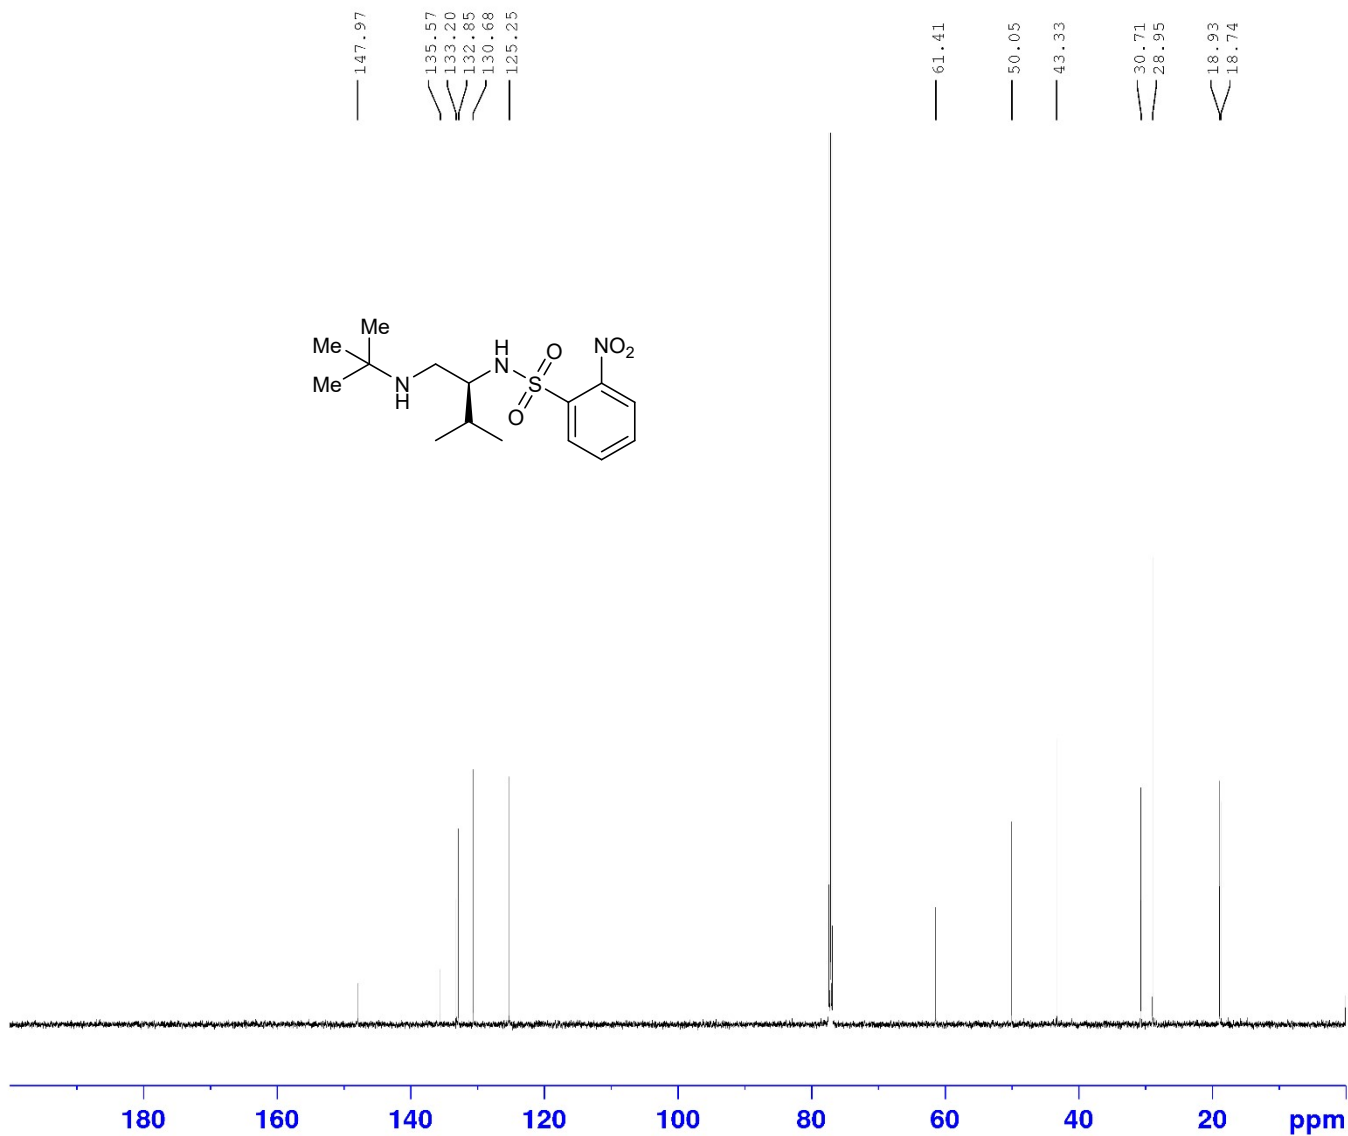

Current Data Parameters  
NAME TW-A-122-B new  
EXPNO 12  
PROCNO 1

F2 - Acquisition Parameters  
Date\_ 20190830  
Time 17.12  
INSTRUM spect  
PROBHD 5 mm PABBO BB/  
PULPROG zgpg30  
TD 65536  
SOLVENT CDCl3  
NS 1024  
DS 4  
SWH 36057.691 Hz  
FIDRES 0.550197 Hz  
AQ 0.9087659 sec  
RG 186.92  
DW 13.867 usec  
DE 6.50 usec  
TE 300.0 K  
D1 2.00000000 sec  
D11 0.03000000 sec  
TD0 1

===== CHANNEL f1 =====  
SFO1 150.9178981 MHz  
NUC1 13C  
P1 11.80 usec  
PLW1 85.00000000 W

===== CHANNEL f2 =====  
SFO2 600.1324005 MHz  
NUC2 1H  
CPDPRG[2] waltz16  
PCPD2 80.00 usec  
PLW2 27.00000000 W  
PLW12 0.43891999 W  
PLW13 0.28090999 W

F2 - Processing parameters  
SI 32768  
SF 150.9027886 MHz  
WDW EM  
SSB 0  
LB 1.00 Hz  
GB 0  
PC 1.40

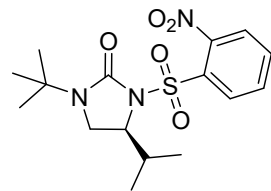

Current Data Parameters  
 NAME TW-A-123-A RERUN  
 EXPNO 20  
 PROCNO 1

F2 - Acquisition Parameters  
 Date\_ 20190427  
 Time 16.40  
 INSTRUM spect  
 PROBHD 5 mm PABBO BB/  
 PULPROG zg30  
 TD 131072  
 SOLVENT CDCl3  
 NS 64  
 DS 0  
 SWH 12019.230 Hz  
 FIDRES 0.091699 Hz  
 AQ 5.4525952 sec  
 RG 203  
 DW 41.600 usec  
 DE 9.85 usec  
 TE 300.0 K  
 D1 0.10000000 sec  
 TDO 1

===== CHANNEL f1 =====  
 SFO1 399.9024695 MHz  
 NUC1 1H  
 P1 14.88 usec  
 PLW1 7.59999990 W

F2 - Processing parameters  
 SI 131072  
 SF 399.9000100 MHz  
 WDW EM  
 SSB 0  
 LB 0.10 Hz  
 GB 0  
 PC 1.00

S9  
 1H NMR  
 400 MHz  
 CDCl3

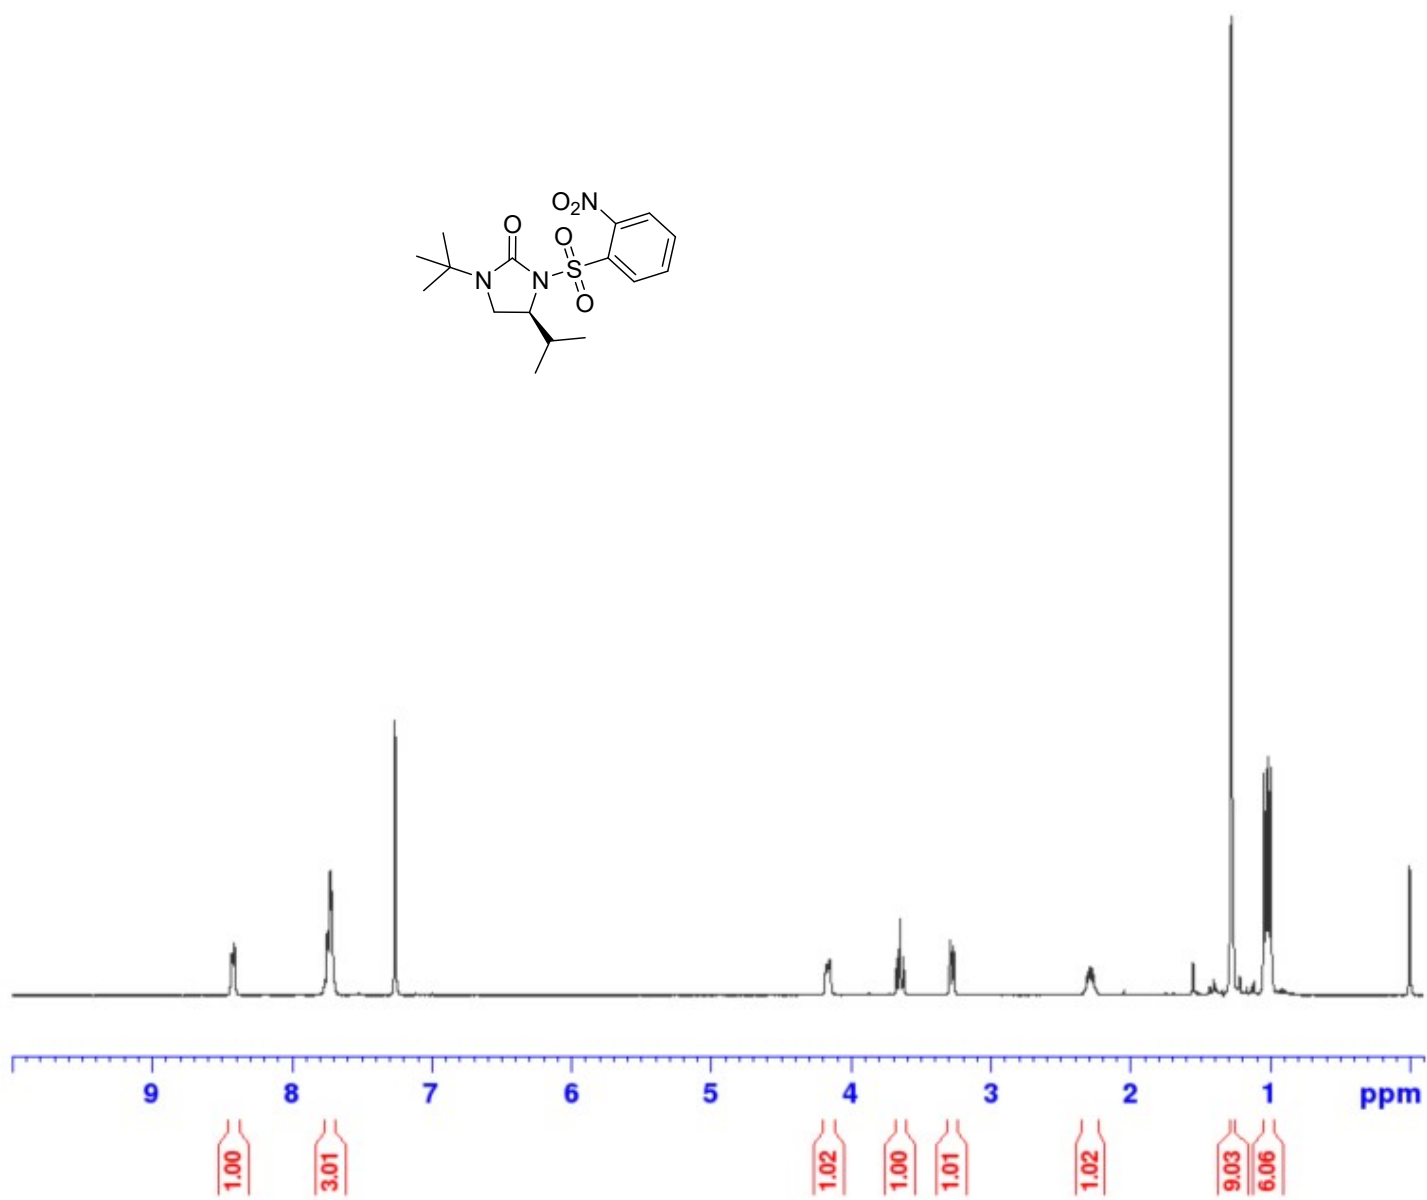

S9  
13C NMR  
101 MHz  
CDCl3

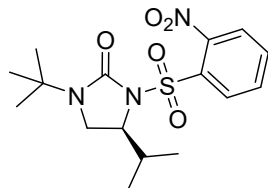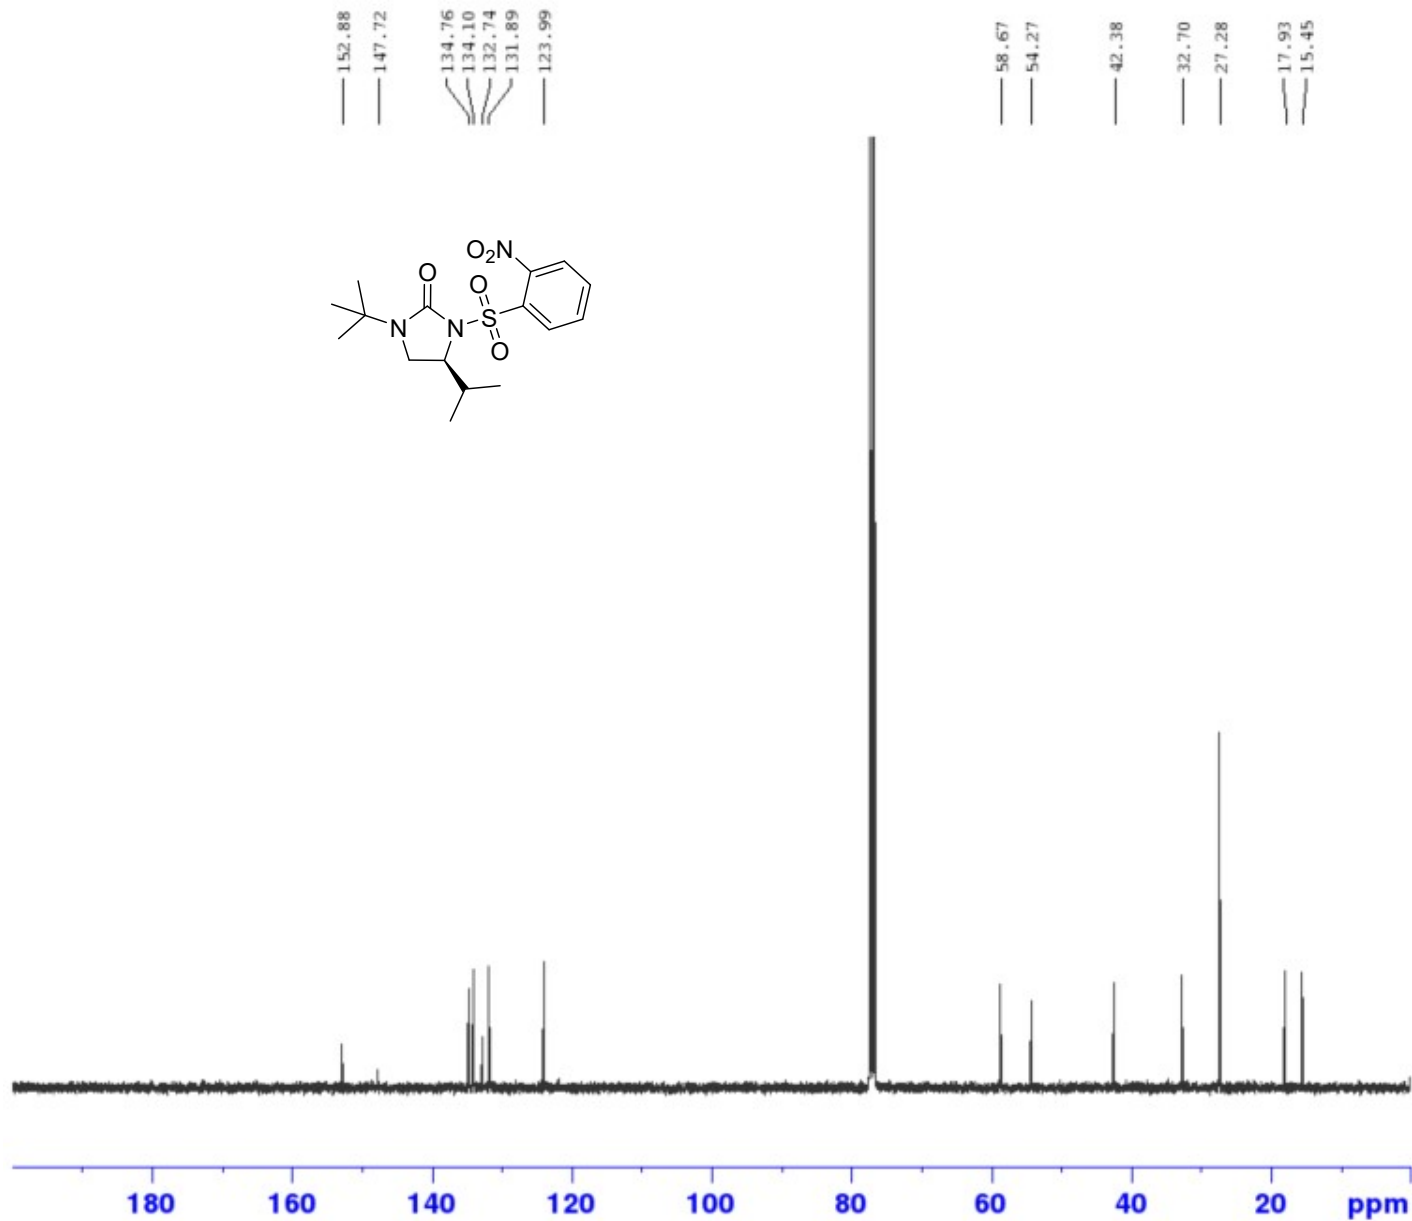

Current Data Parameters  
NAME TW-A-123-A RERUN  
EXPNO 23  
PROCNO 1

F2 - Acquisition Parameters  
Date\_ 20190428  
Time 10.12  
INSTRUM spect  
PROBHD 5 mm PABBO BB/  
PULPROG zgpg30  
TD 65536  
SOLVENT CDC13  
NS 1024  
DS 4  
SWH 24038.461 Hz  
FIDRES 0.366798 Hz  
AQ 1.3631488 sec  
RG 203  
DW 20.800 usec  
DE 6.50 usec  
TE 300.0 K  
D1 2.0000000 sec  
D11 0.0300000 sec  
TDO 1

----- CHANNEL f1 -----  
SFO1 100.5649900 MHz  
NUC1 13C  
P1 10.00 usec  
PLW1 44.46300125 W

----- CHANNEL f2 -----  
SFO2 399.9015996 MHz  
NUC2 1H  
CPDPRG[2] waltz16  
PCPD2 90.00 usec  
PLW2 7.599999990 W  
PLW12 0.20774999 W  
PLW13 0.16827001 W

F2 - Processing parameters  
SI 32768  
SF 100.5549350 MHz  
WDW EM  
SSB 0  
LB 1.00 Hz  
GB 0  
PC 1.40

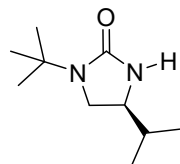

S10  
<sup>1</sup>H NMR  
 400 MHz  
 CDCl<sub>3</sub>

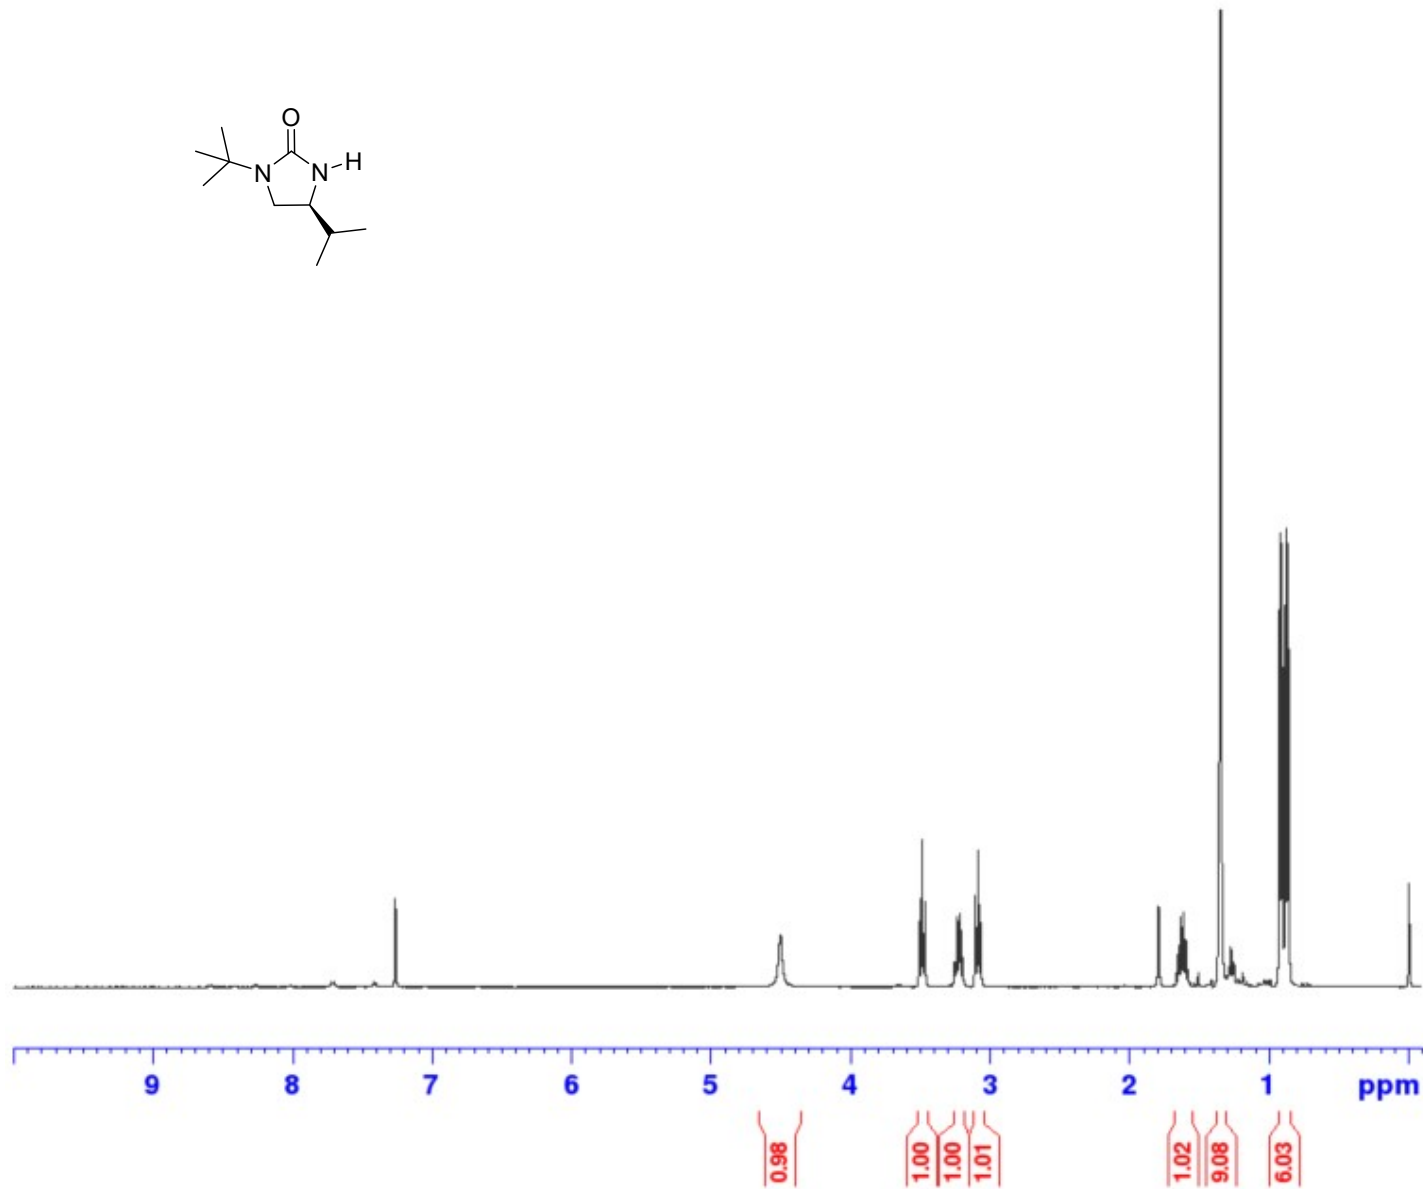

Current Data Parameters  
 NAME TW-A-194-A RERUN  
 EXPNO 20  
 PROCNO 1

F2 - Acquisition Parameters  
 Date\_ 20190501  
 Time 0.02  
 INSTRUM spect  
 PROBHD 5 mm PABBO BB/  
 PULPROG zg30  
 TD 131072  
 SOLVENT CDCl3  
 NS 64  
 DS 0  
 SWH 12019.230 Hz  
 FIDRES 0.091699 Hz  
 AQ 5.4525952 sec  
 RG 80.6  
 DW 41.600 usec  
 DE 9.85 usec  
 TE 300.0 K  
 D1 0.10000000 sec  
 TDO 1

----- CHANNEL f1 -----  
 SFO1 399.9024695 MHz  
 NUC1 1H  
 P1 14.88 usec  
 PLW1 7.59999990 W

F2 - Processing parameters  
 SI 131072  
 SF 399.9000098 MHz  
 WDW EM  
 SSB 0  
 LB 0.10 Hz  
 GB 0  
 PC 1.00

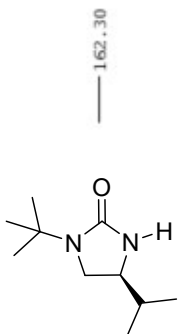

S10  
<sup>13</sup>C NMR  
 101 MHz  
 CDCl<sub>3</sub>

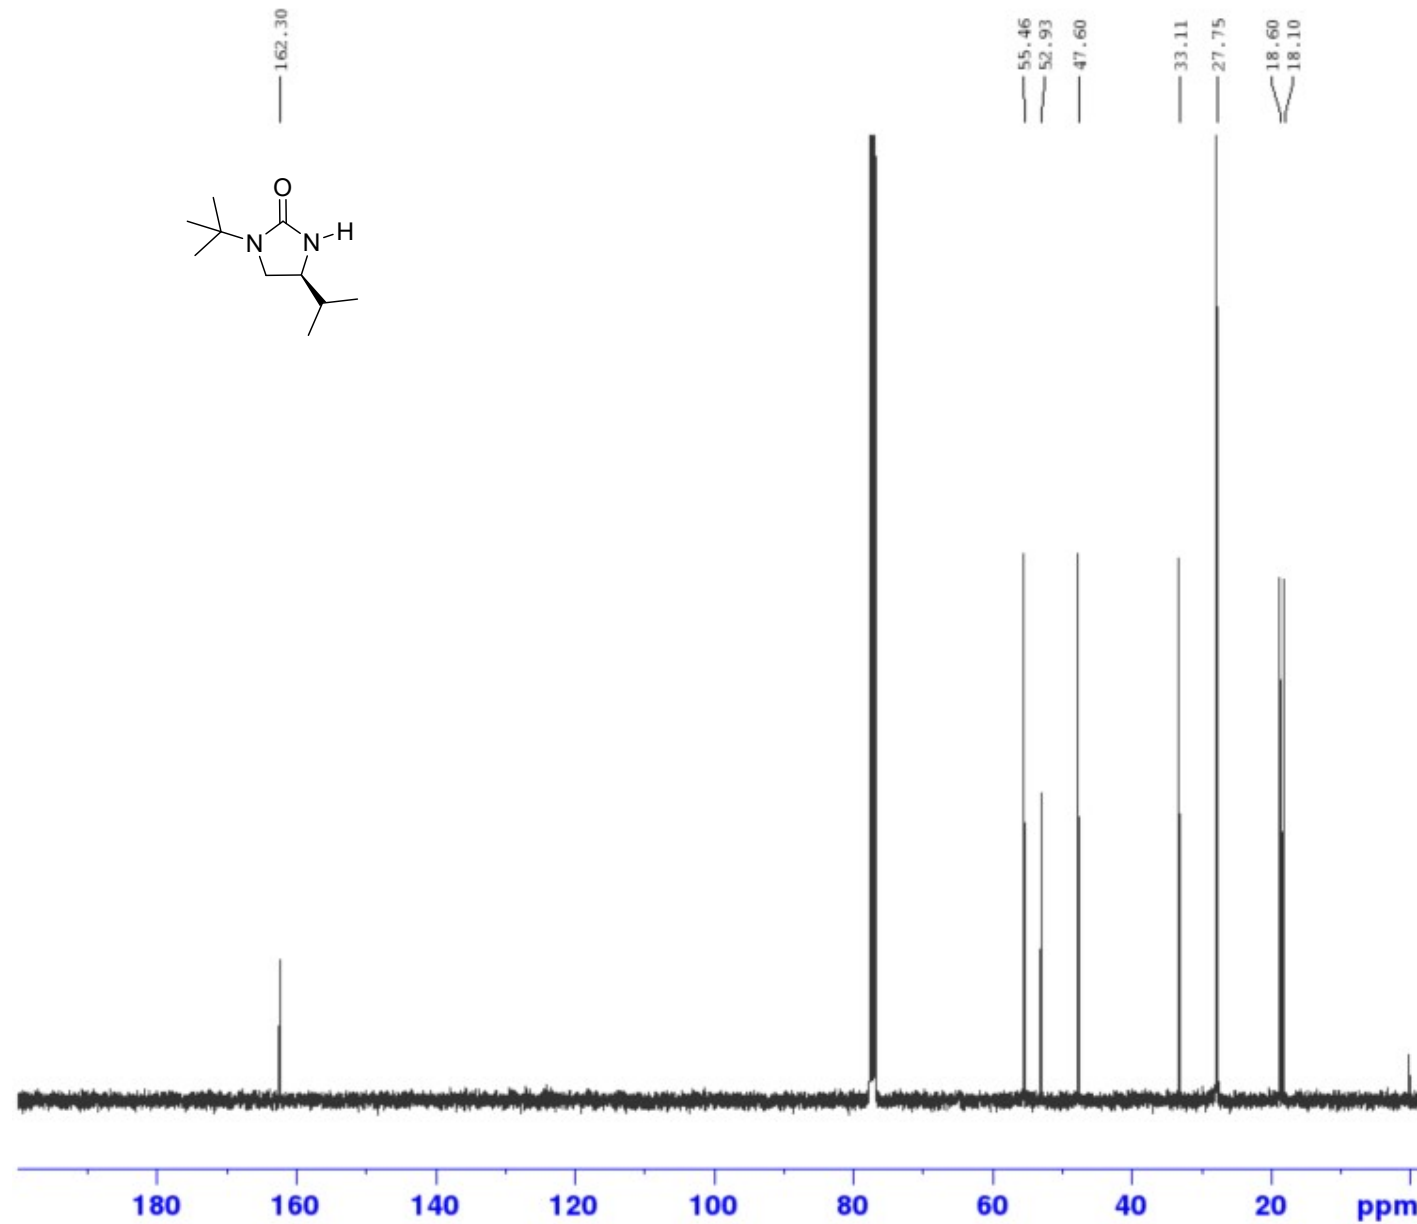

```

Current Data Parameters
NAME      TW-A-194-A RERUN
EXPNO     22
PROCNO    1

F2 - Acquisition Parameters
Date_     20190501
Time      1.02
INSTRUM   spect
PROBHD    5 mm PABBO BB/
PULPROG   zgpg30
TD        65536
SOLVENT   CDCl3
NS        1024
DS        4
SWH       24038.461 Hz
FIDRES    0.366798 Hz
AQ        1.3631488 sec
RG        203
DW        20.800 usec
DE        6.50 usec
TE        300.0 K
D1        2.00000000 sec
D11       0.03000000 sec
TD0       1

===== CHANNEL f1 =====
SFO1      100.5649900 MHz
NUC1      13C
P1        10.00 usec
PLW1      44.46300125 W

===== CHANNEL f2 =====
SFO2      399.9015996 MHz
NUC2      1H
CPDPRG[2] waltz16
PCPD2     90.00 usec
PLW2      7.599999990 W
PLW12     0.20774999 W
PLW13     0.16827001 W

F2 - Processing parameters
SI        32768
SF        100.5549216 MHz
WDW       EM
SSB       0
LB        1.00 Hz
GB        0
PC        1.40
  
```

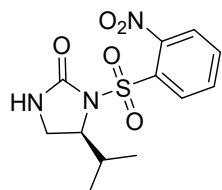

Current Data Parameters  
 NAME TW-A-137-A RERUN  
 EXPNO 10  
 PROCNO 1

F2 - Acquisition Parameters  
 Date\_ 20190427  
 Time 20.59  
 INSTRUM spect  
 PROBHD 5 mm PABBO BB/  
 PULPROG zg30  
 TD 131072  
 SOLVENT CDC13  
 NS 64  
 DS 0  
 SWH 12019.230 Hz  
 FIDRES 0.091699 Hz  
 AQ 5.4525952 sec  
 RG 203  
 DW 41.600 usec  
 DE 9.85 usec  
 TE 300.0 K  
 D1 0.1000000 sec  
 TDO 1

----- CHANNEL f1 -----  
 SFO1 399.9024695 MHz  
 NUC1 1H  
 P1 14.88 usec  
 PLW1 7.59999990 W

F2 - Processing parameters  
 SI 131072  
 SF 399.9000099 MHz  
 WDW EM  
 SSB 0  
 LB 0.10 Hz  
 GB 0  
 PC 1.00

S11  
<sup>1</sup>H NMR  
 400 MHz  
 CDCl<sub>3</sub>

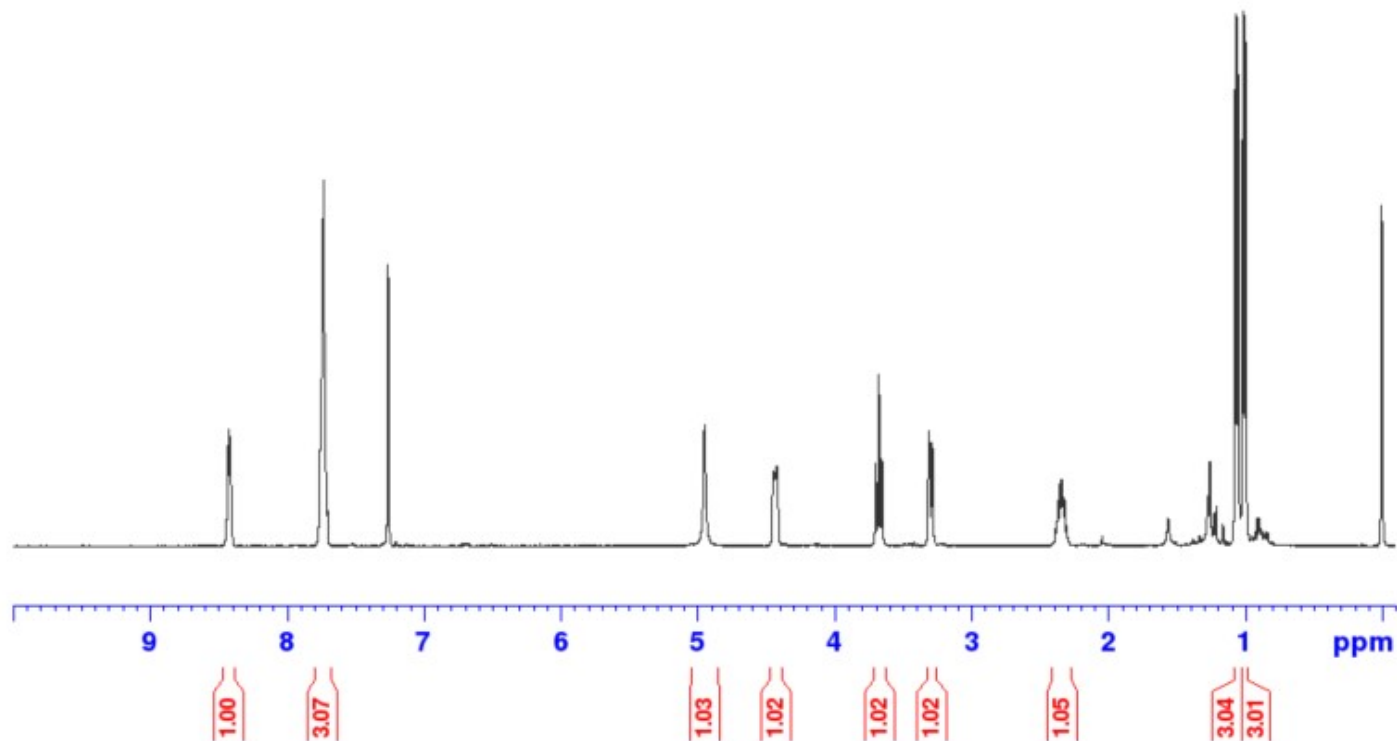



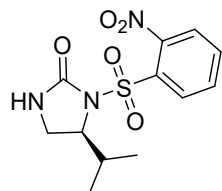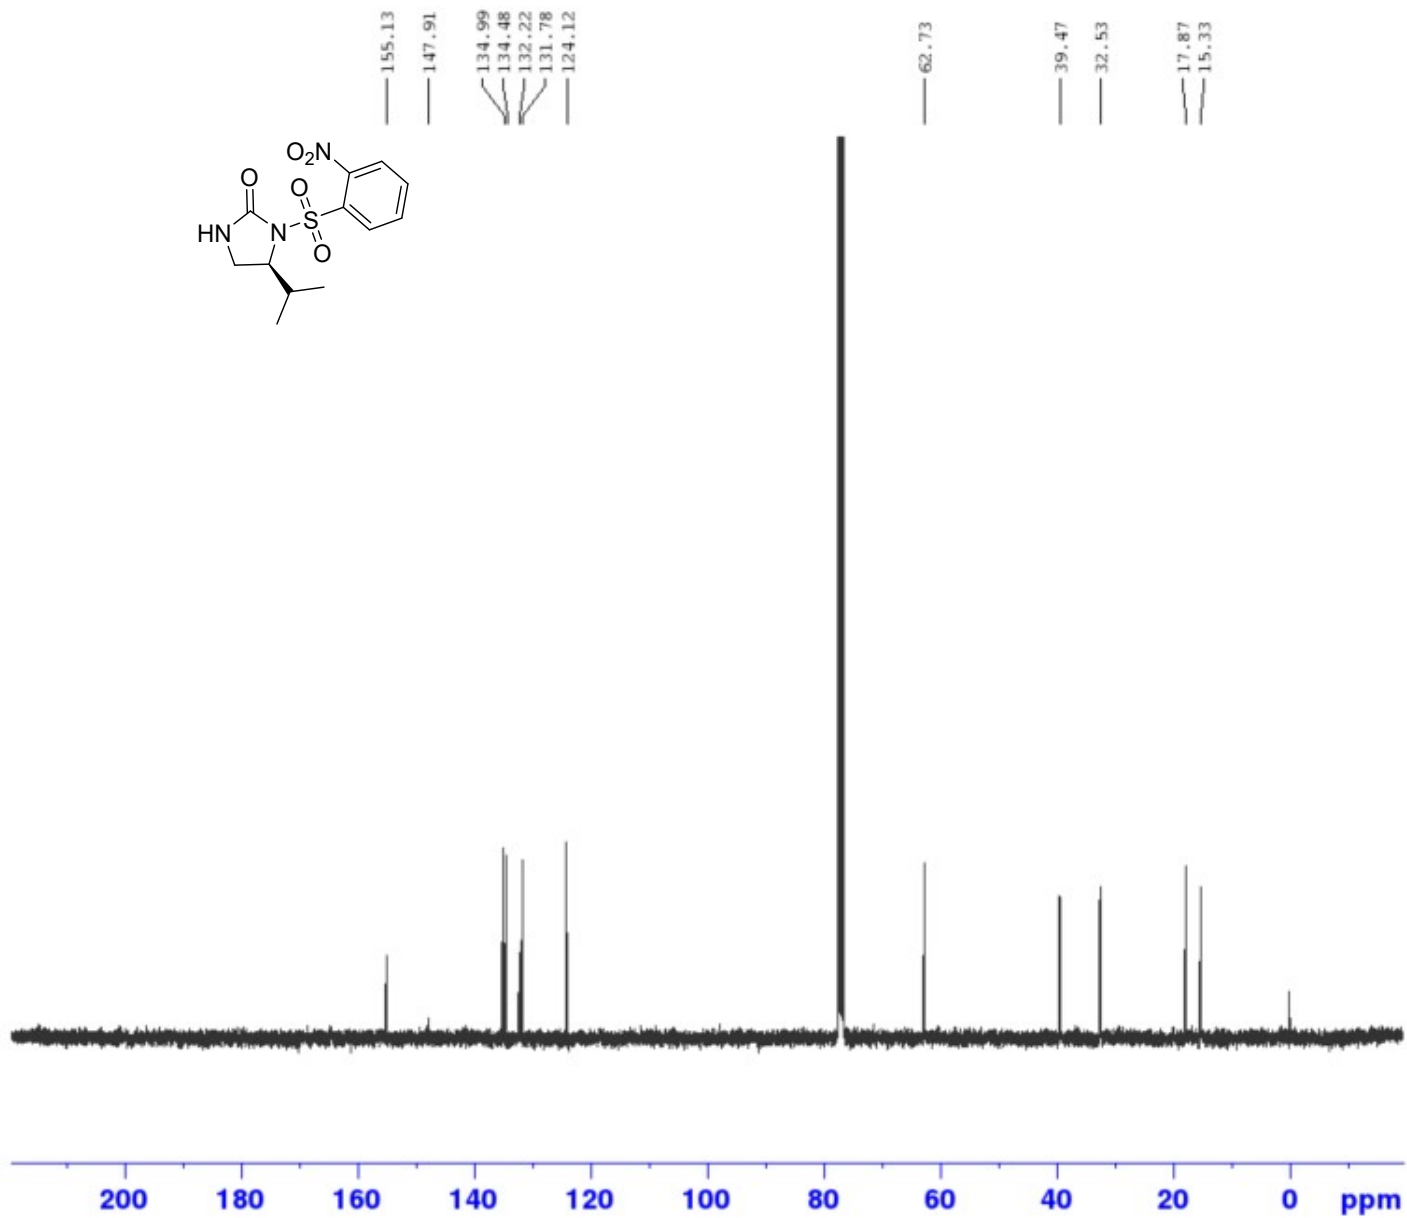

Current Data Parameters  
 NAME TW-A-137-A RERUN  
 EXPNO 11  
 PROCNO 1

F2 - Acquisition Parameters  
 Date\_ 20190429  
 Time 2.09  
 INSTRUM spect  
 PROBHD 5 mm PABBO BB/  
 PULPROG zgpg30  
 TD 65536  
 SOLVENT CDC13  
 NS 1024  
 DS 4  
 SWH 24038.461 Hz  
 FIDRES 0.366798 Hz  
 AQ 1.3631488 sec  
 RG 203  
 DW 20.800 usec  
 DE 6.50 usec  
 TE 300.0 K  
 D1 2.0000000 sec  
 D11 0.03000000 sec  
 TDO 1

===== CHANNEL f1 =====  
 SFO1 100.5649900 MHz  
 NUC1 13C  
 P1 10.00 usec  
 PLW1 44.46300125 W

===== CHANNEL f2 =====  
 SFO2 399.9015996 MHz  
 NUC2 1H  
 CPDPRG[2] waltz16  
 PCPD2 90.00 usec  
 PLW2 7.59999990 W  
 PLW12 0.20774999 W  
 PLW13 0.16827001 W

F2 - Processing parameters  
 SI 32768  
 SF 100.5549350 MHz  
 WDW EM  
 SSB 0  
 LB 1.00 Hz  
 GB 0  
 PC 1.40

S11  
<sup>13</sup>C NMR  
 101 MHz  
 CDCl<sub>3</sub>

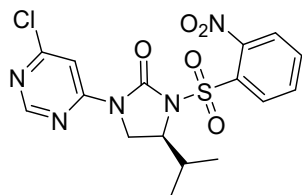

Current Data Parameters  
 NAME TW-B-196-A 600  
 EXPNO 27  
 PROCNO 1

F2 - Acquisition Parameters  
 Date\_ 20190830  
 Time 18.57  
 INSTRUM spect  
 PROBHD 5 mm PABBO BB/  
 PULPROG zg30  
 TD 65536  
 SOLVENT CDC13  
 NS 16  
 DS 2  
 SWH 12019.230 Hz  
 FIDRES 0.183399 Hz  
 AQ 2.7262976 sec  
 RG 134.29  
 DW 41.600 usec  
 DE 6.50 usec  
 TE 300.0 K  
 D1 1.00000000 sec  
 TDO 1

----- CHANNEL f1 -----  
 SFO1 600.1337060 MHz  
 NUC1 1H  
 P1 10.00 usec  
 PLW1 26.60000038 W

F2 - Processing parameters  
 SI 65536  
 SF 600.1300150 MHz  
 WDW EM  
 SSB 0  
 LB 0.30 Hz  
 GB 0  
 PC 1.00

S12  
 1H NMR  
 600 MHz  
 CDCl<sub>3</sub>

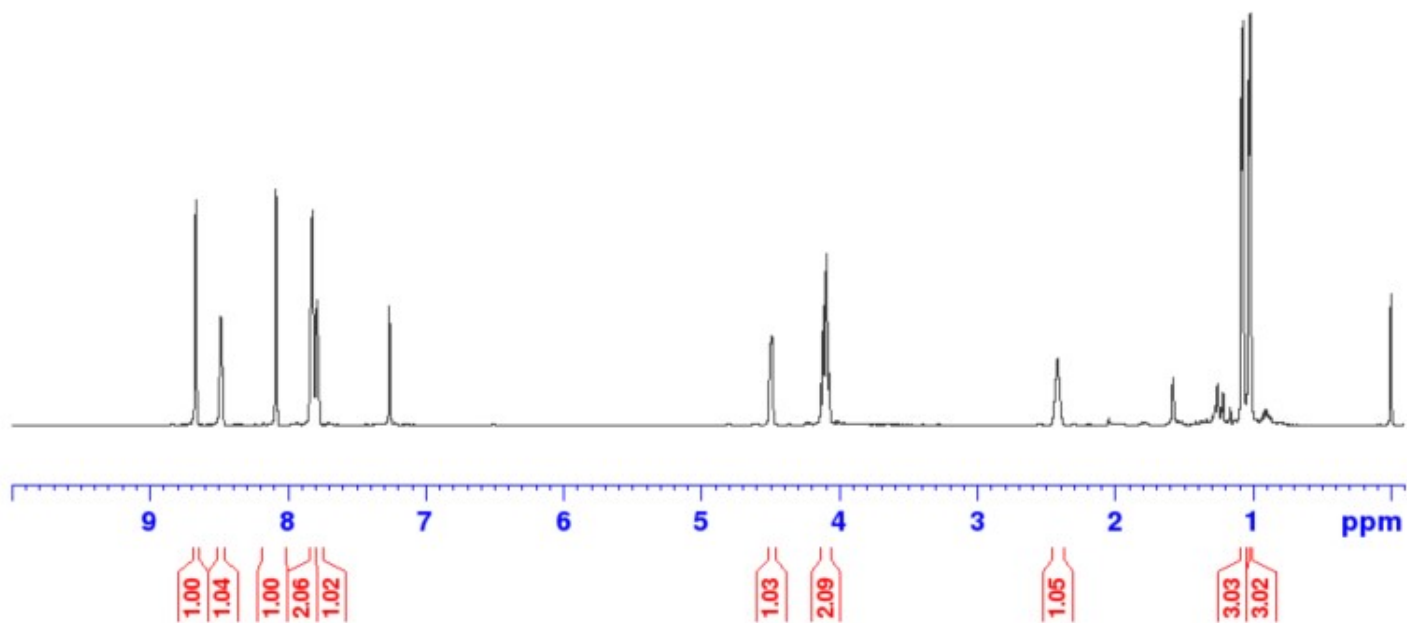

S12  
<sup>13</sup>C NMR  
 151 MHz  
 CDCl<sub>3</sub>

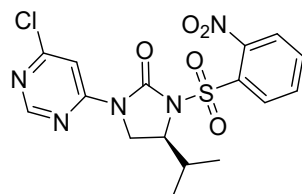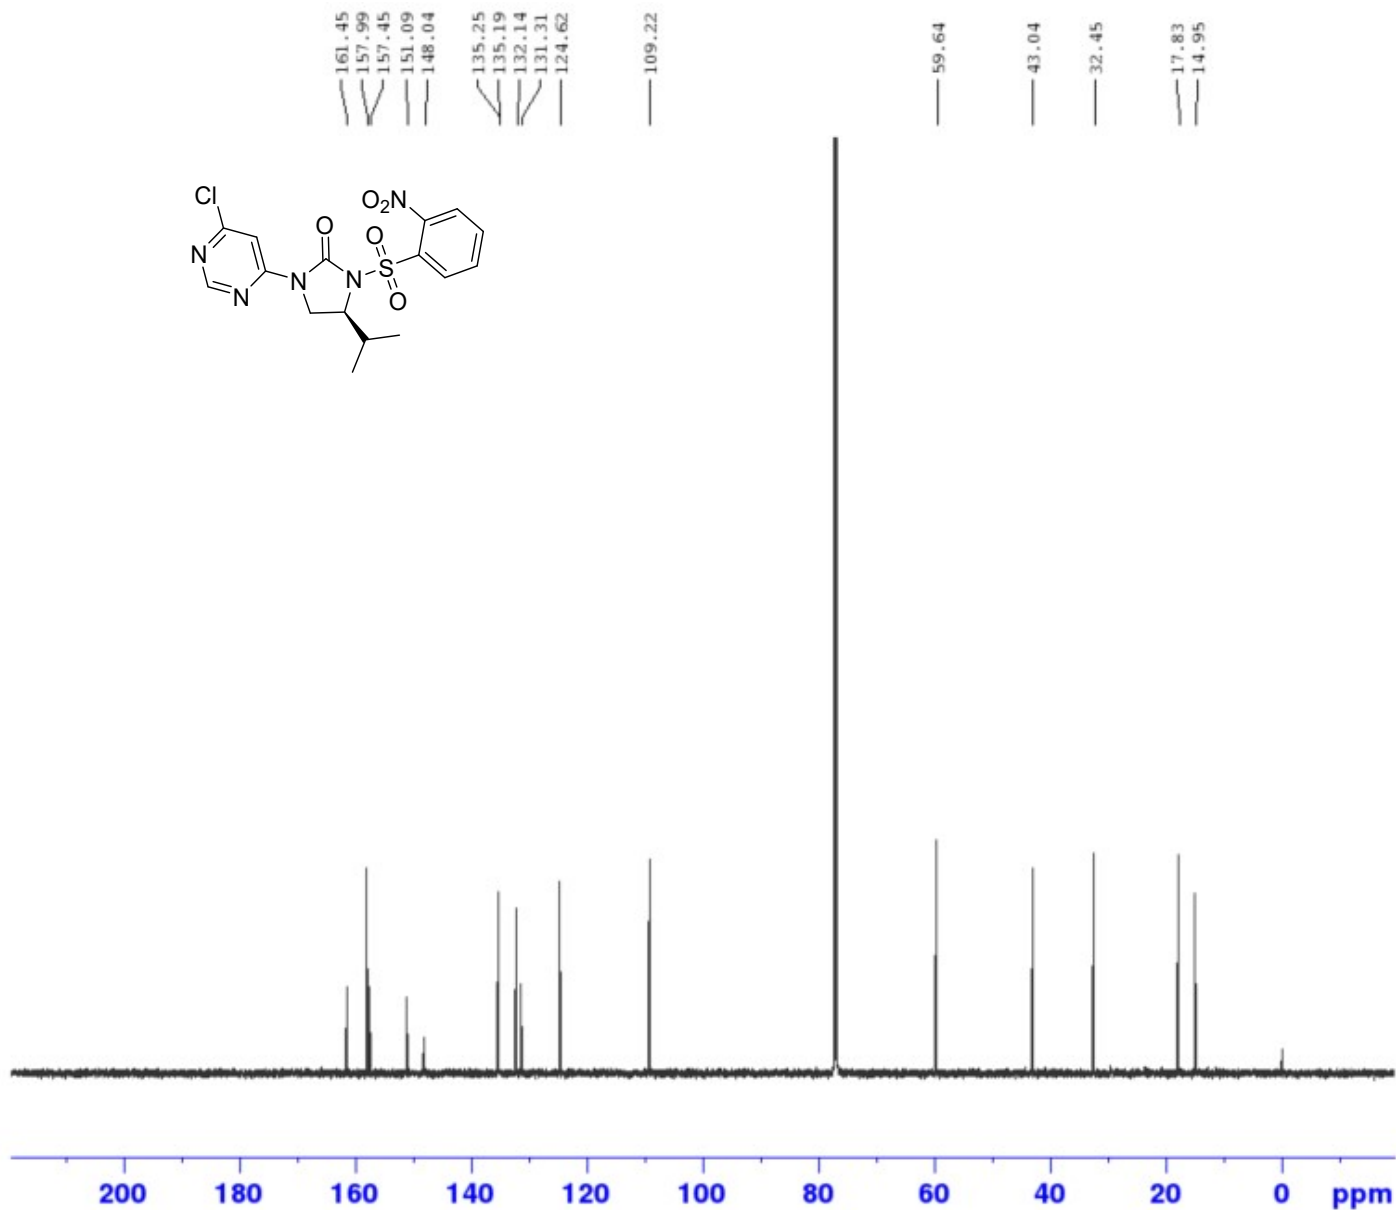

```

Current Data Parameters
NAME      TW-B-196-A 600
EXPNO    28
PROCNO   1

F2 - Acquisition Parameters
Date_    20190830
Time     19.48
INSTRUM  spect
PROBHD   5 mm PABBO BB/
PULPROG  zgpg30
TD       65536
SOLVENT  CDCl3
NS       1024
DS       4
SWH      36057.691 Hz
FIDRES   0.550197 Hz
AQ       0.9087659 sec
RG       186.92
DW       13.867 usec
DE       6.50 usec
TE       300.0 K
D1       2.00000000 sec
D11      0.03000000 sec
TDO      1

----- CHANNEL f1 -----
SFO1    150.9178981 MHz
NUC1     13C
P1       11.80 usec
PLW1     85.00000000 W

----- CHANNEL f2 -----
SFO2    600.1324005 MHz
NUC2     1H
CPDPRG[2]  waltz16
PCPD2    80.00 usec
PLW2     27.00000000 W
PLW12    0.43891999 W
PLW13    0.28090999 W

F2 - Processing parameters
SI       32768
SF       150.9028085 MHz
WDW      EM
SSB      0
LB       1.00 Hz
GB       0
PC       1.40
  
```

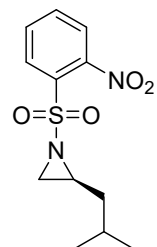

Current Data Parameters  
 NAME TW-A-43 RERUN  
 EXPNO 70  
 PROCNO 1

F2 - Acquisition Parameters  
 Date\_ 20190425  
 Time 14.14  
 INSTRUM spect  
 PROBHD 5 mm PABBO BB/  
 PULPROG zg30  
 TD 131072  
 SOLVENT CDCl3  
 NS 64  
 DS 0  
 SWH 12019.230 Hz  
 FIDRES 0.091699 Hz  
 AQ 5.4525952 sec  
 RG 90.5  
 DW 41.600 usec  
 DE 9.85 usec  
 TE 300.0 K  
 D1 0.10000000 sec  
 TDO 1

----- CHANNEL f1 -----  
 SFO1 399.9024695 MHz  
 NUC1 1H  
 P1 14.88 usec  
 PLW1 7.59999990 W

F2 - Processing parameters  
 SI 131072  
 SF 399.9000105 MHz  
 WDW EM  
 SSB 0  
 LB 0.10 Hz  
 GB 0  
 PC 1.00

S13  
<sup>1</sup>H NMR  
 400 MHz  
 CDCl<sub>3</sub>

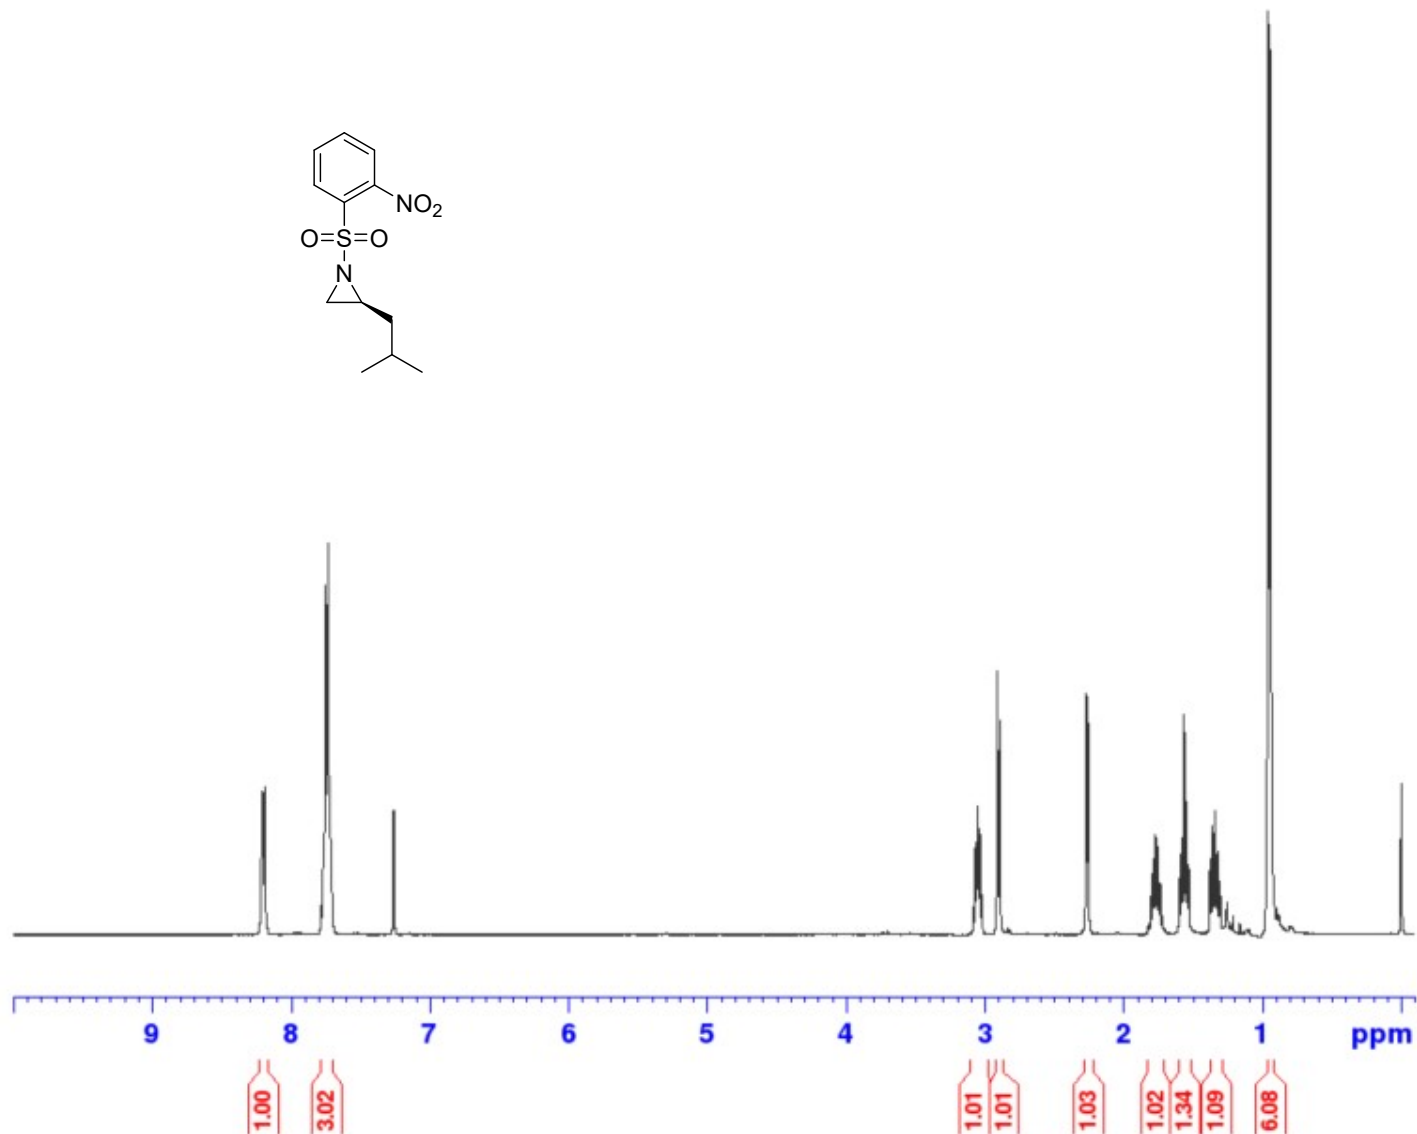

S13  
<sup>13</sup>C NMR  
 101 MHz  
 CDCl<sub>3</sub>

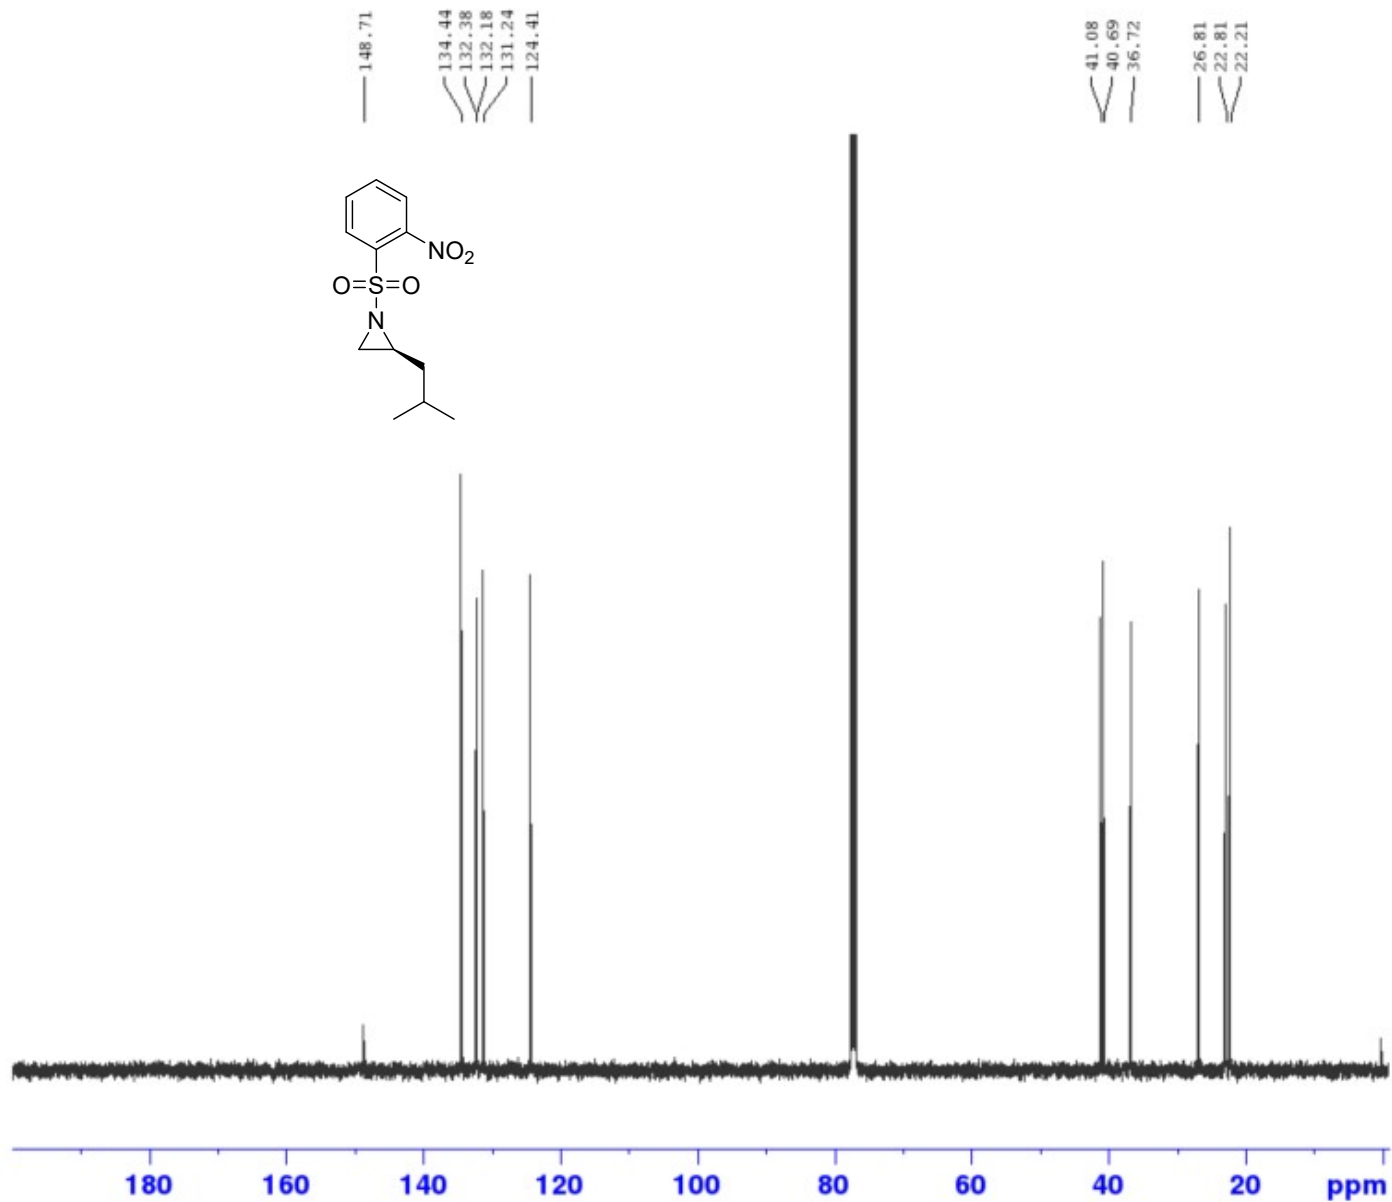

Current Data Parameters  
 NAME TW-A-43 RERUN  
 EXPNO 72  
 PROCNO 1

F2 - Acquisition Parameters  
 Date\_ 20190426  
 Time 18.03  
 INSTRUM spect  
 PROBHD 5 mm PABBO BB/  
 PULPROG zgpg30  
 TD 65536  
 SOLVENT CDC13  
 NS 1024  
 DS 4  
 SWH 24038.461 Hz  
 FIDRES 0.366798 Hz  
 AQ 1.3631488 sec  
 RG 203  
 DW 20.800 usec  
 DE 6.50 usec  
 TE 300.0 K  
 D1 2.00000000 sec  
 D11 0.03000000 sec  
 TDO 1

----- CHANNEL f1 -----  
 SFO1 100.5649900 MHz  
 NUC1 13C  
 P1 10.00 usec  
 PLW1 44.46300125 W

----- CHANNEL f2 -----  
 SFO2 399.9015996 MHz  
 NUC2 1H  
 CPDPRG[2] waltz16  
 PCPD2 90.00 usec  
 PLW2 7.59999990 W  
 PLW12 0.20774999 W  
 PLW13 0.16827001 W

F2 - Processing parameters  
 SI 32768  
 SF 100.5549219 MHz  
 WDW EM  
 SSB 0  
 LB 1.00 Hz  
 GB 0  
 PC 1.40

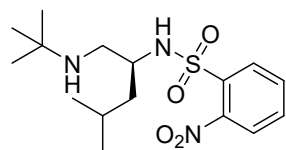

Current Data Parameters  
 NAME TW-A-48 RERUN  
 EXPNO 10  
 PROCNO 1

F2 - Acquisition Parameters  
 Date\_ 20190425  
 Time 12.06  
 INSTRUM spect  
 PROBHD 5 mm PABBO BB/  
 PULPROG zg30  
 TD 131072  
 SOLVENT CDC13  
 NS 64  
 DS 0  
 SWH 12019.230 Hz  
 FIDRES 0.091699 Hz  
 AQ 5.4525952 sec  
 RG 203  
 DW 41.600 usec  
 DE 9.85 usec  
 TE 300.0 K  
 D1 0.10000000 sec  
 TDO 1

----- CHANNEL f1 -----  
 SF01 399.9024695 MHz  
 NUC1 1H  
 P1 14.88 usec  
 PLW1 7.59999990 W

F2 - Processing parameters  
 SI 131072  
 SF 399.9000097 MHz  
 WDW EM  
 SSB 0  
 LB 0.10 Hz  
 GB 0  
 PC 1.00

S14  
<sup>1</sup>H NMR  
 400 MHz  
 CDCl<sub>3</sub>

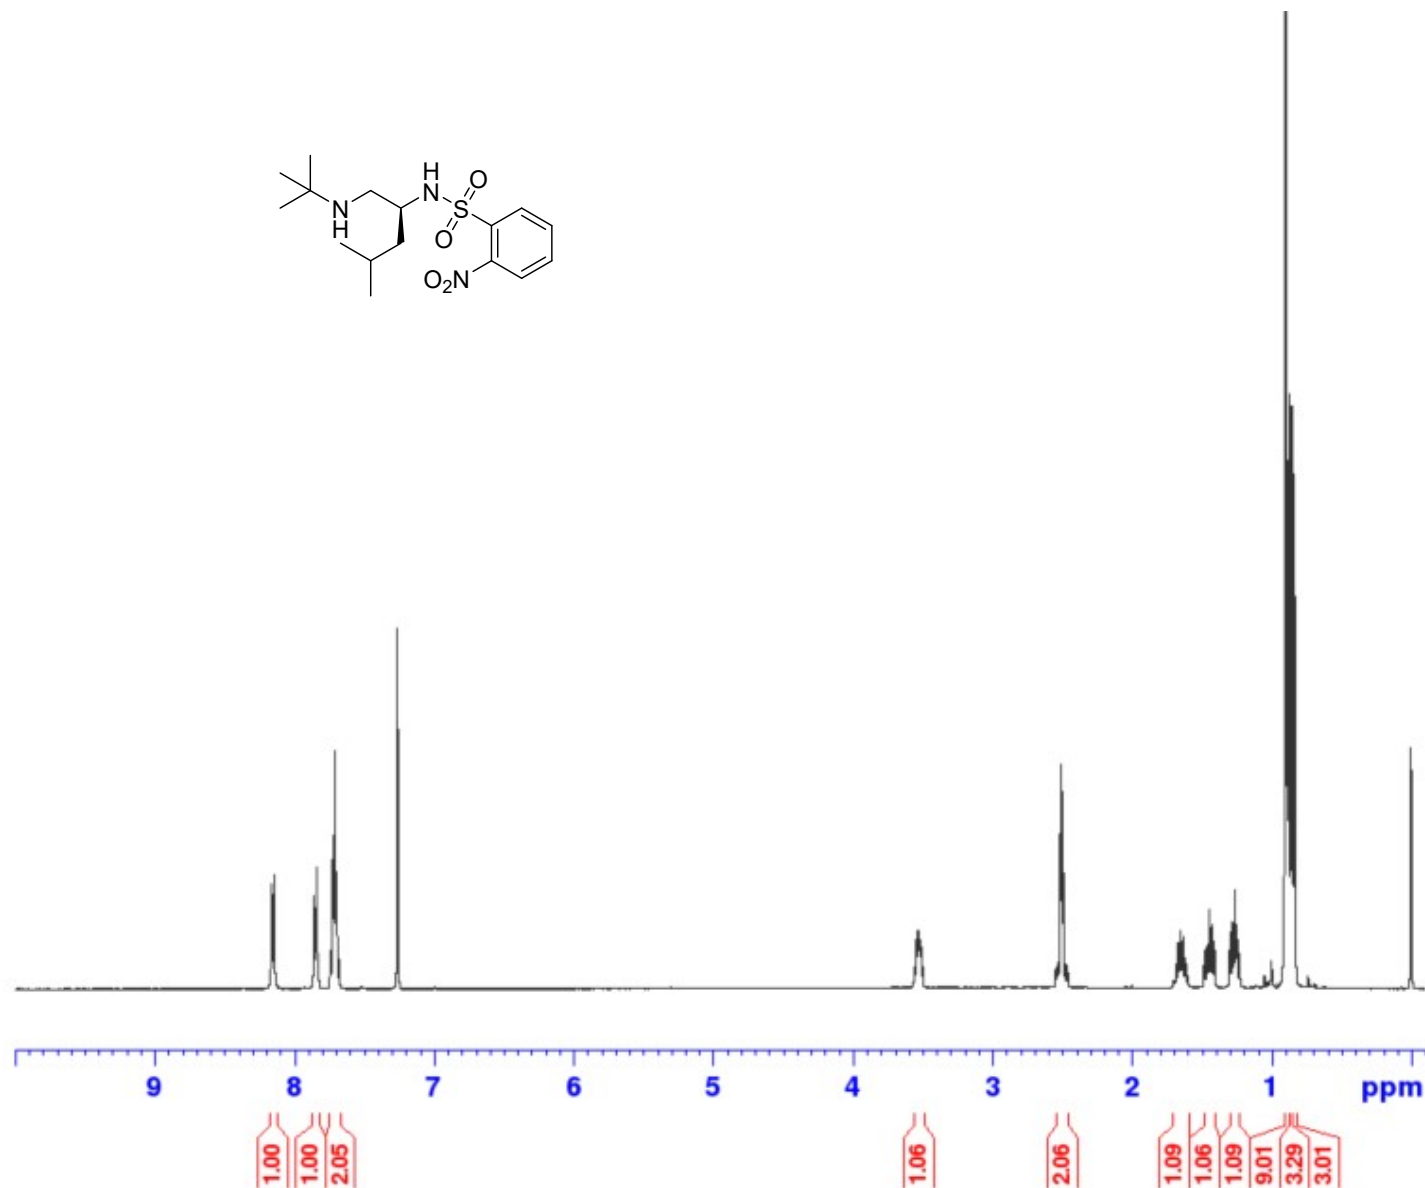

S14  
<sup>13</sup>C NMR  
 101 MHz  
 CDCl<sub>3</sub>

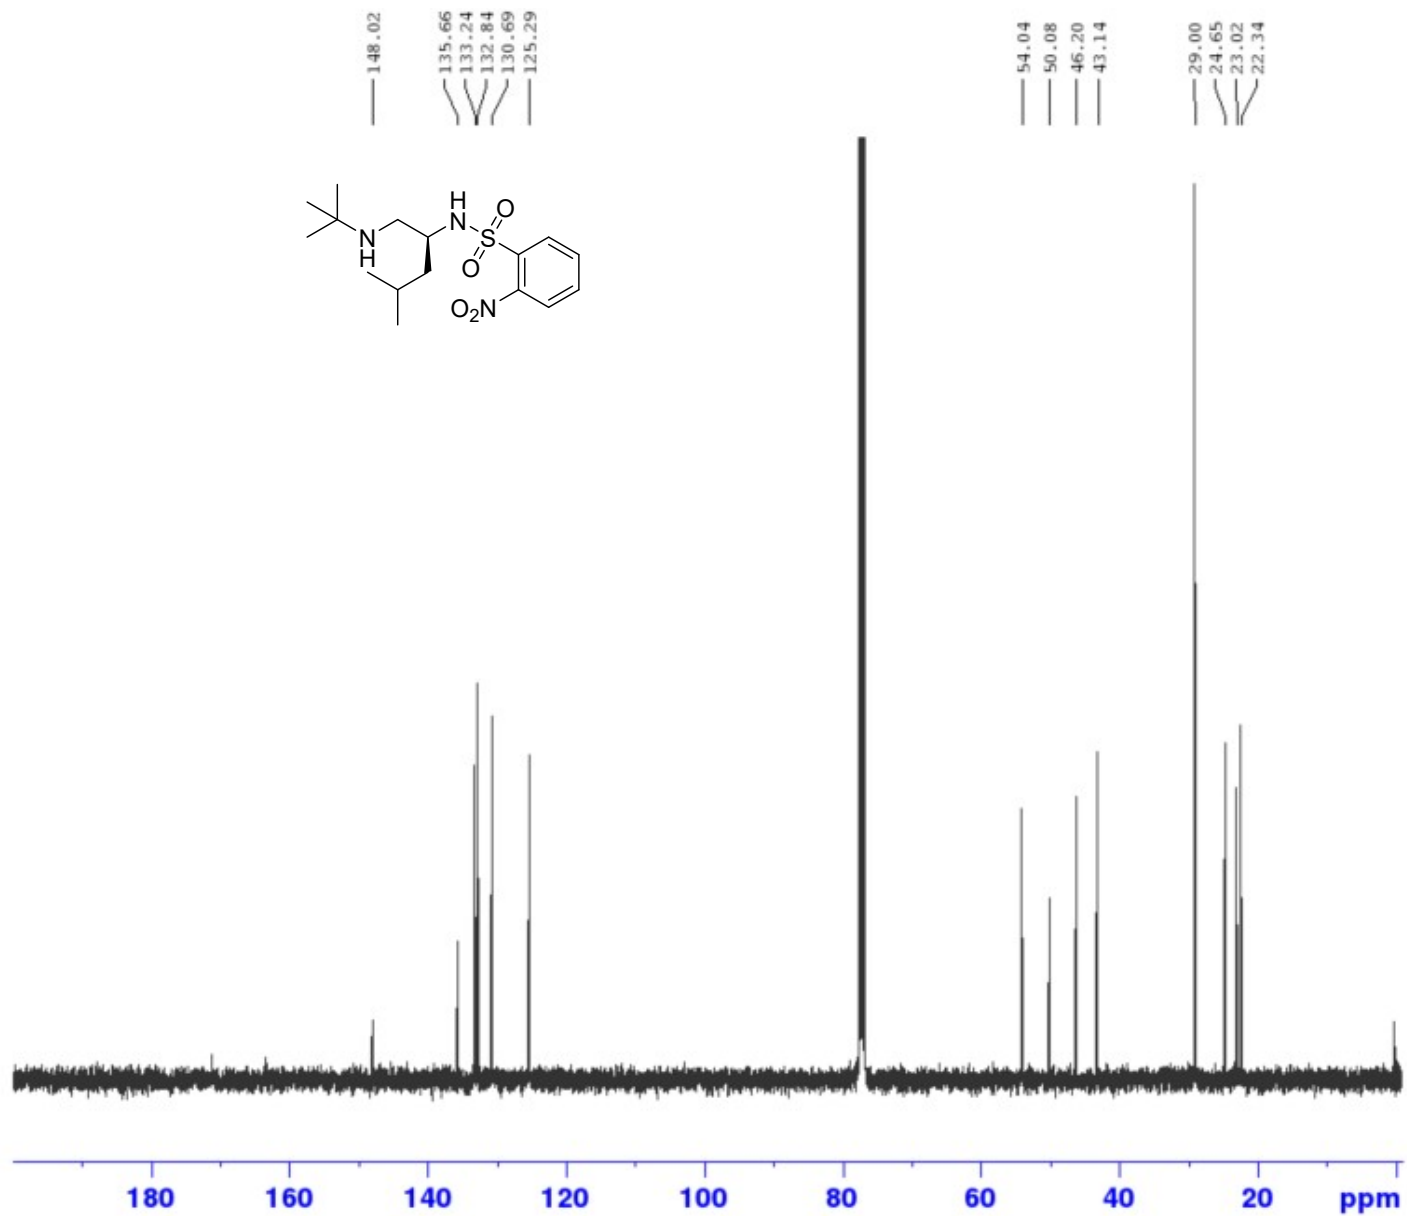

Current Data Parameters  
 NAME TW-A-48 RERUN  
 EXPNO 12  
 PROCNO 1

F2 - Acquisition Parameters  
 Date\_ 20190425  
 Time 19.34  
 INSTRUM spect  
 PROBHD 5 mm PABBO BB/  
 PULPROG zgpg30  
 TD 65536  
 SOLVENT CDC13  
 NS 1024  
 DS 4  
 SWH 24038.461 Hz  
 FIDRES 0.366798 Hz  
 AQ 1.3631488 sec  
 RG 203  
 DW 20.800 usec  
 DE 6.50 usec  
 TE 300.0 K  
 D1 2.00000000 sec  
 D11 0.03000000 sec  
 TDO 1

----- CHANNEL f1 -----  
 SFO1 100.5649900 MHz  
 NUC1 13C  
 P1 10.00 usec  
 PLW1 44.46300125 W

----- CHANNEL f2 -----  
 SFO2 399.9015996 MHz  
 NUC2 1H  
 CPDPRG[2] waltz16  
 PCPD2 90.00 usec  
 PLW2 7.59999990 W  
 PLW12 0.20774999 W  
 PLW13 0.16827001 W

F2 - Processing parameters  
 SI 32768  
 SF 100.5549209 MHz  
 WDW EM  
 SSB 0  
 LB 1.00 Hz  
 GB 0  
 PC 1.40

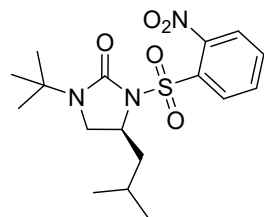

Current Data Parameters  
 NAME TW-A-49-A RERUN  
 EXPNO 20  
 PROCNO 1

F2 - Acquisition Parameters  
 Date\_ 20190425  
 Time 12.26  
 INSTRUM spect  
 PROBHD 5 mm PABBO BB/  
 PULPROG zg30  
 TD 131072  
 SOLVENT CDC13  
 NS 64  
 DS 0  
 SWH 12019.230 Hz  
 FIDRES 0.091699 Hz  
 AQ 5.4525952 sec  
 RG 203  
 DW 41.600 usec  
 DE 9.85 usec  
 TE 300.0 K  
 D1 0.10000000 sec  
 TDO 1

----- CHANNEL f1 -----  
 SFO1 399.9024695 MHz  
 NUC1 1H  
 P1 14.88 usec  
 PLW1 7.59999990 W

F2 - Processing parameters  
 SI 131072  
 SF 399.9000099 MHz  
 WDW EM  
 SSB 0  
 LB 0.10 Hz  
 GB 0  
 PC 1.00

S15  
<sup>1</sup>H NMR  
 400 MHz  
 CDCl<sub>3</sub>

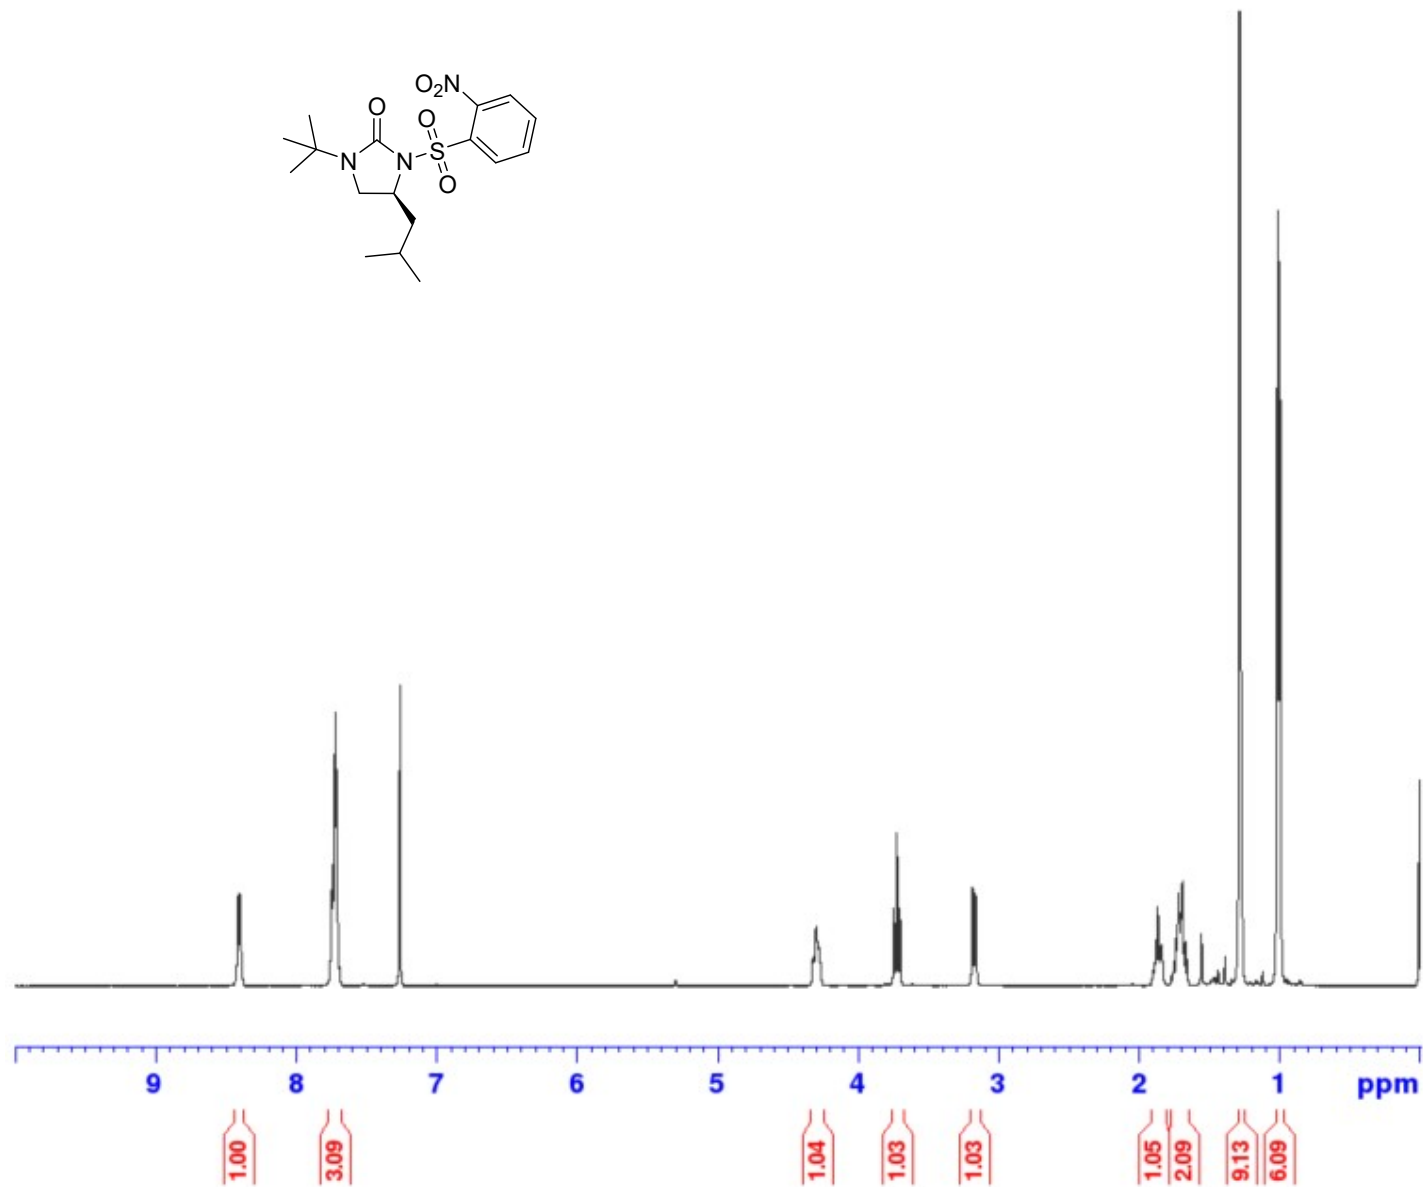



S15  
<sup>13</sup>C NMR  
 101 MHz  
 CDCl<sub>3</sub>

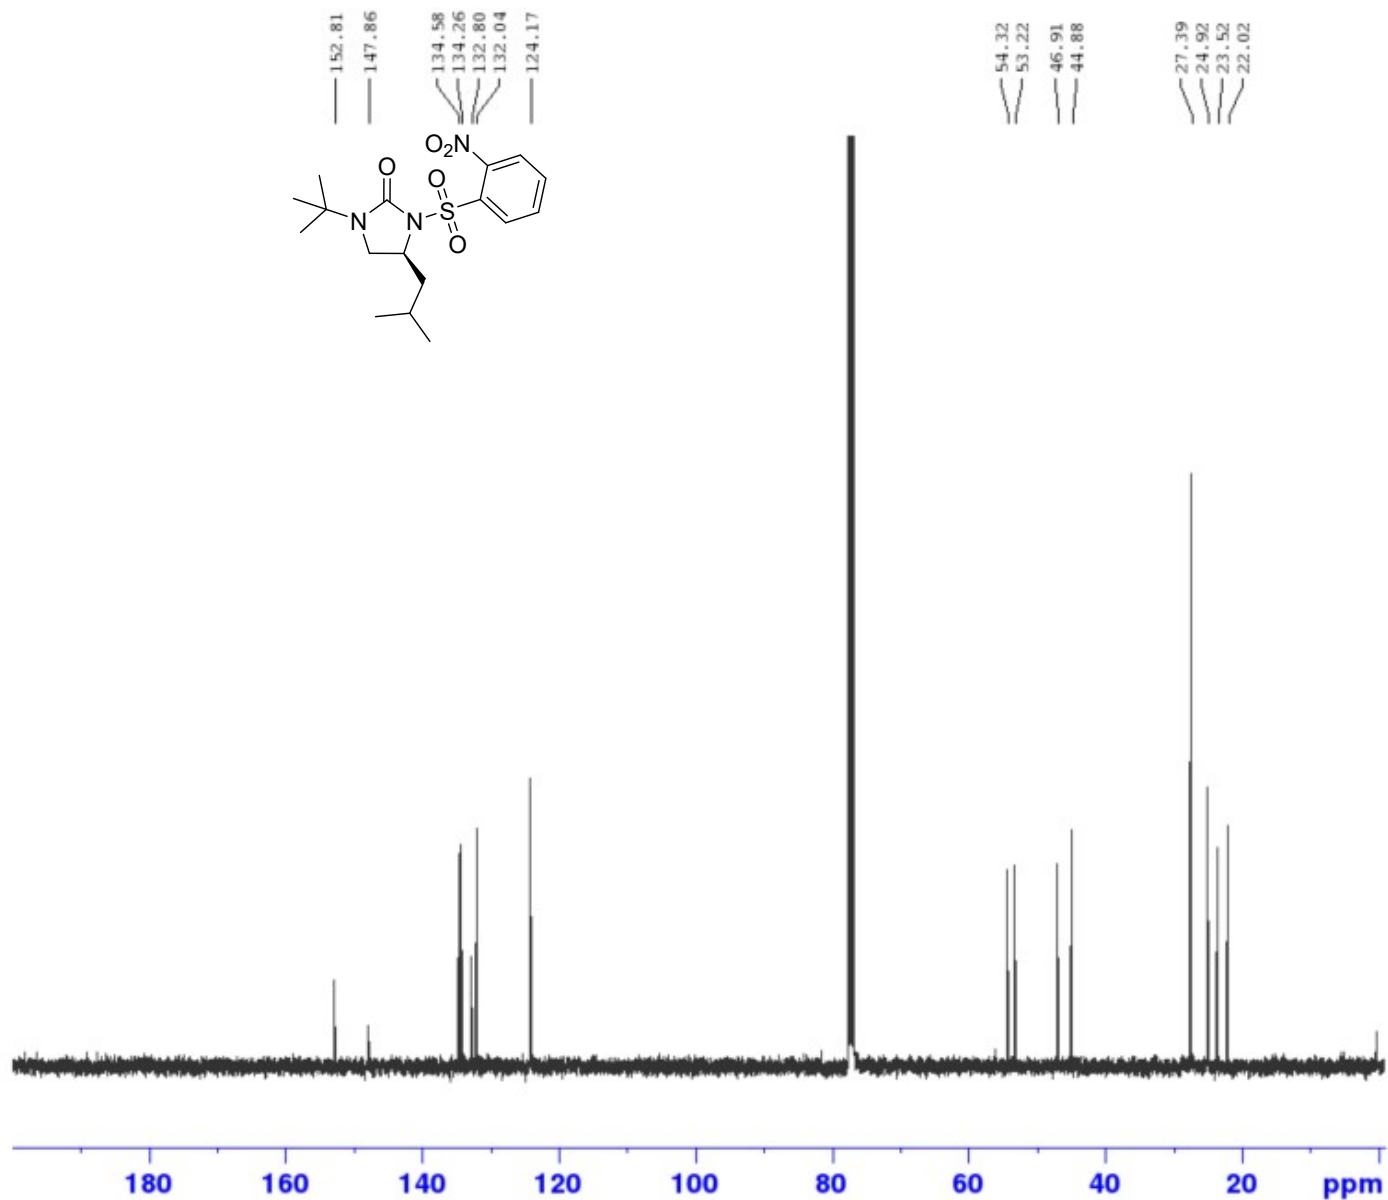

Current Data Parameters  
 NAME TW-A-49-A RERUN  
 EXPNO 23  
 PROCNO 1

F2 - Acquisition Parameters  
 Date\_ 20190425  
 Time 22.38  
 INSTRUM spect  
 PROBHD 5 mm PABBO BB/  
 PULPROG zgpg30  
 TD 65536  
 SOLVENT CDCl3  
 NS 1024  
 DS 4  
 SWH 24038.461 Hz  
 FIDRES 0.366798 Hz  
 AQ 1.3631488 sec  
 RG 203  
 DW 20.800 usec  
 DE 6.50 usec  
 TE 300.0 K  
 D1 2.00000000 sec  
 D11 0.03000000 sec  
 TDO 1

===== CHANNEL f1 =====  
 SFO1 100.5649900 MHz  
 NUC1 13C  
 P1 10.00 usec  
 PLW1 44.46300125 W

===== CHANNEL f2 =====  
 SFO2 399.9015996 MHz  
 NUC2 1H  
 CPDPRG[2] waltz16  
 PCPD2 90.00 usec  
 PLW2 7.59999990 W  
 PLW12 0.20774999 W  
 PLW13 0.16827001 W

F2 - Processing parameters  
 SI 32768  
 SF 100.5549209 MHz  
 WDW EM  
 SSB 0  
 LB 1.00 Hz  
 GB 0  
 PC 1.40

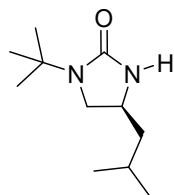

Current Data Parameters  
 NAME TW-A-79-A RERUN  
 EXPNO 30  
 PROCNO 1

F2 - Acquisition Parameters  
 Date\_ 20190425  
 Time 12.16  
 INSTRUM spect  
 PROBHD 5 mm PABBO BB/  
 PULPROG zg30  
 TD 131072  
 SOLVENT CDC13  
 NS 64  
 DS 0  
 SWH 12019.230 Hz  
 FIDRES 0.091699 Hz  
 AQ 5.4525952 sec  
 RG 90.5  
 DW 41.600 usec  
 DE 9.85 usec  
 TE 300.0 K  
 D1 0.10000000 sec  
 TDO 1

----- CHANNEL f1 -----  
 SFO1 399.9024695 MHz  
 NUC1 1H  
 P1 14.88 usec  
 PLW1 7.59999990 W

F2 - Processing parameters  
 SI 131072  
 SF 399.9000098 MHz  
 WDW EM  
 SSB 0  
 LB 0.10 Hz  
 GB 0  
 PC 1.00

S16  
<sup>1</sup>H NMR  
 400 MHz  
 CDCl<sub>3</sub>

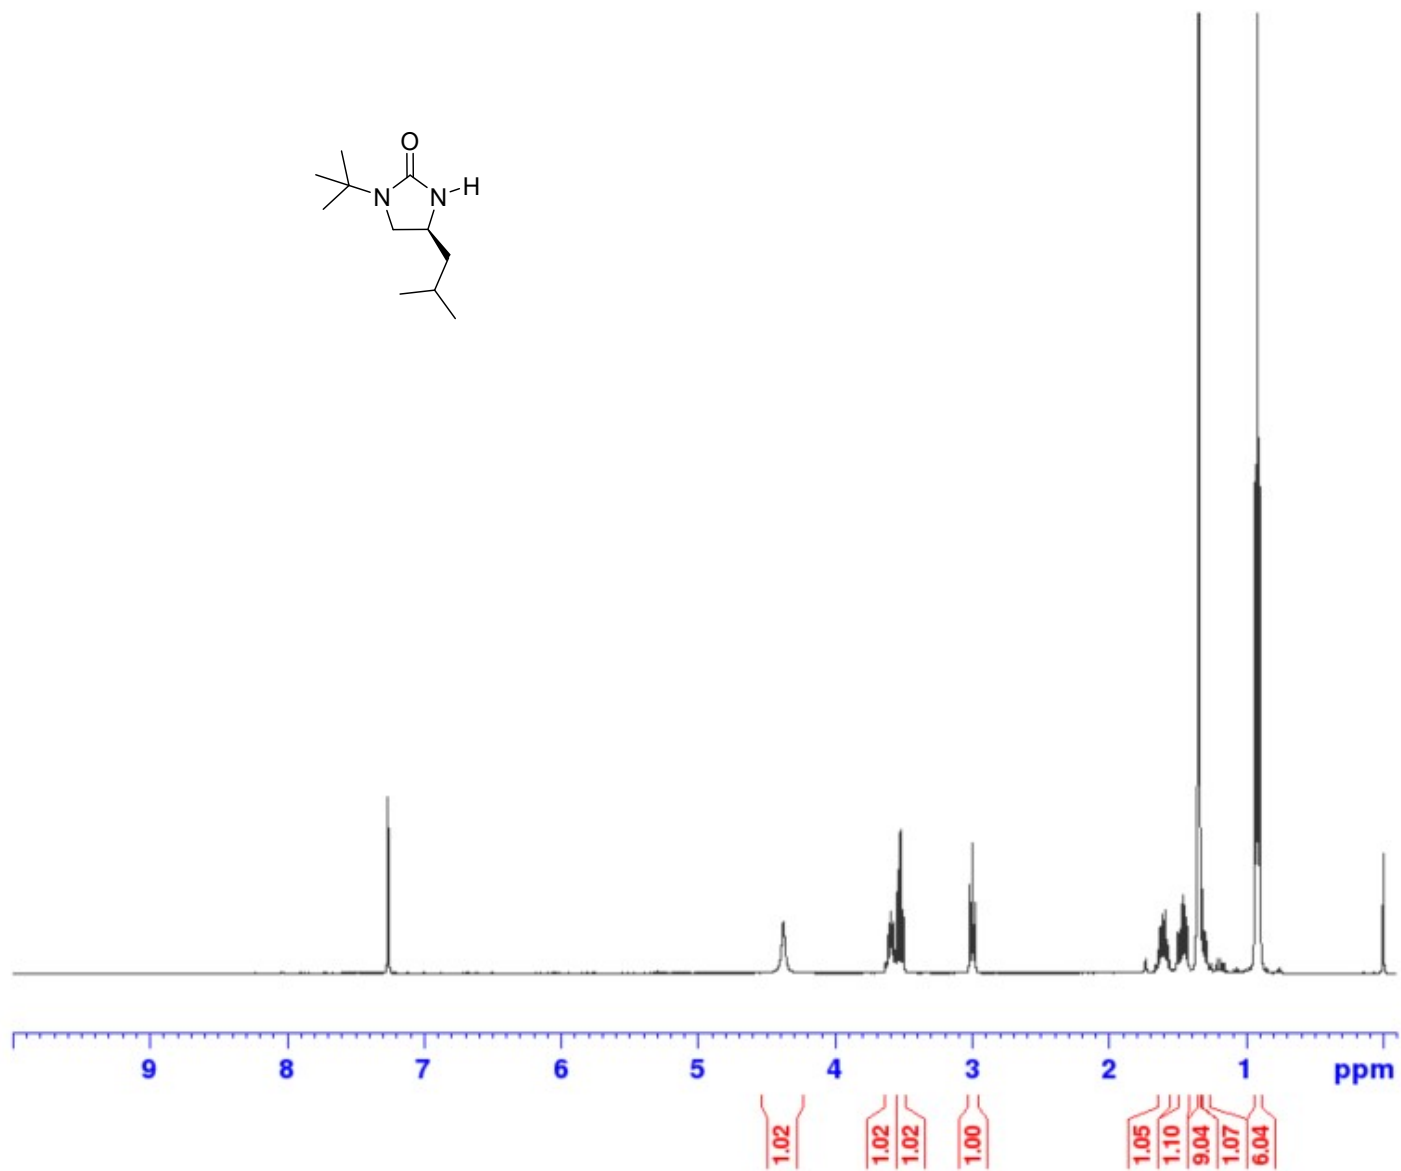

S16  
13C NMR  
101 MHz  
CDCl3

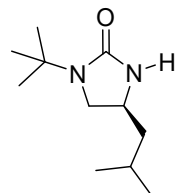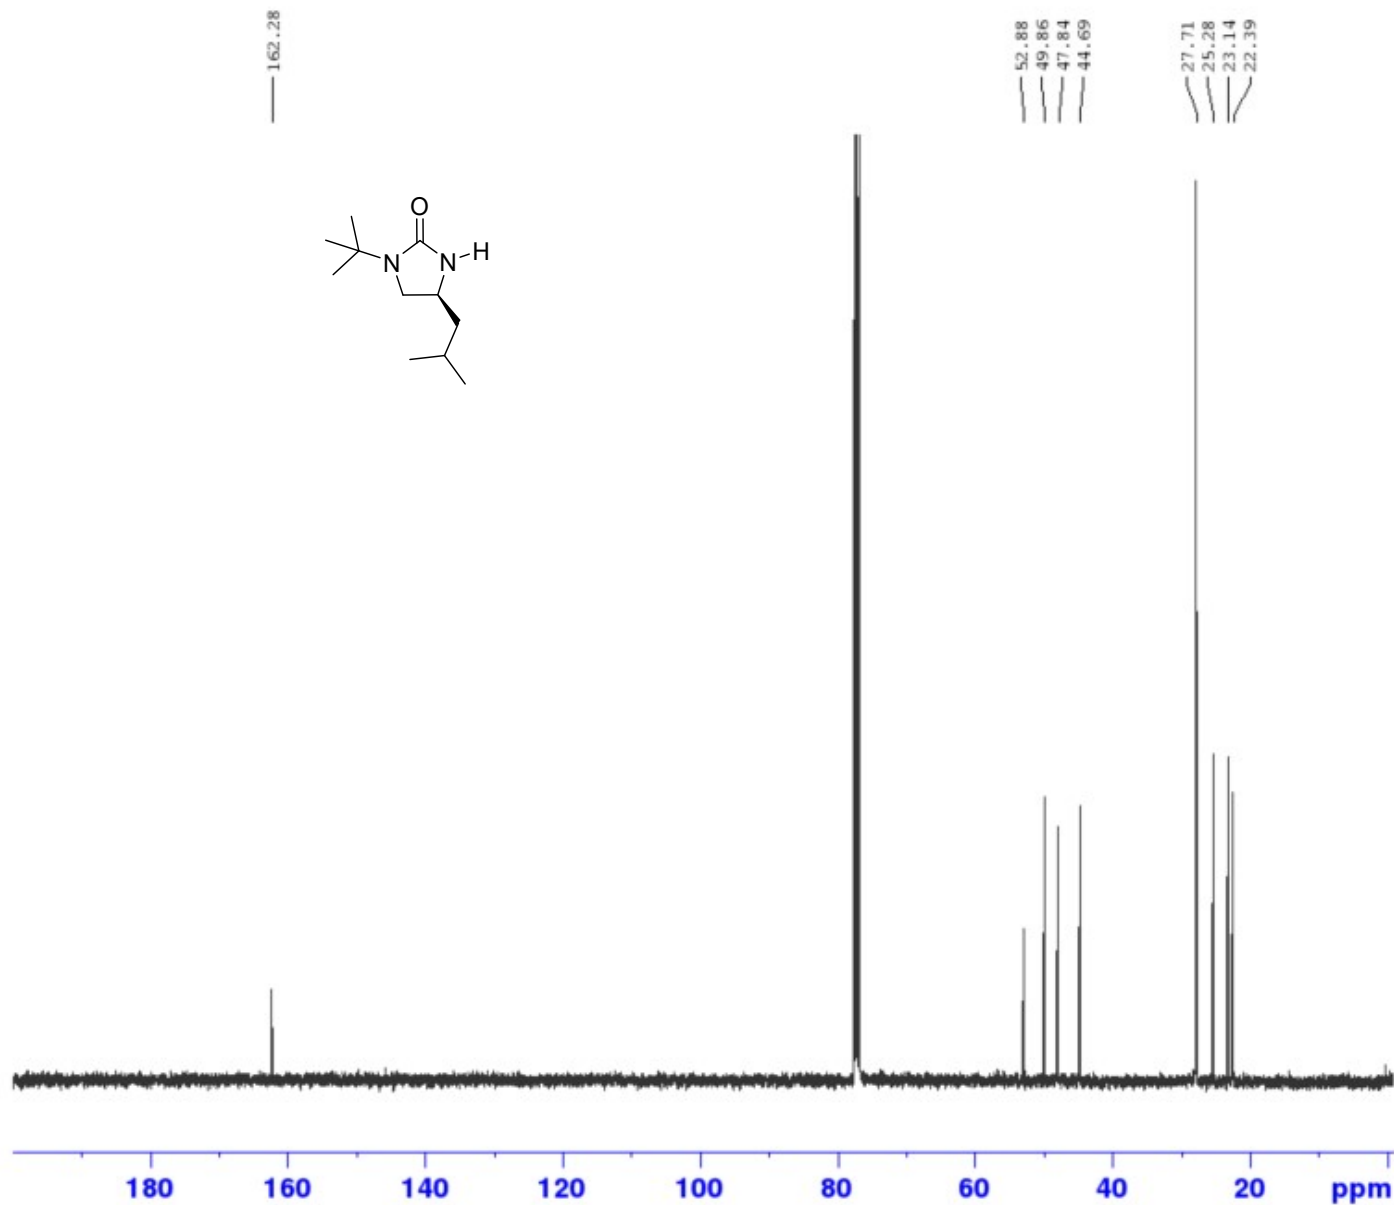

Current Data Parameters  
NAME TW-A-79-A RERUN  
EXPNO 33  
PROCNO 1

F2 - Acquisition Parameters  
Date\_ 20190426  
Time 1.42  
INSTRUM spect  
PROBHD 5 mm PABBO BB/  
PULPROG zgpg30  
TD 65536  
SOLVENT CDCl3  
NS 1024  
DS 4  
SWH 24038.461 Hz  
FIDRES 0.366798 Hz  
AQ 1.3631488 sec  
RG 144  
DW 20.800 usec  
DE 6.50 usec  
TE 300.0 K  
D1 2.00000000 sec  
D11 0.03000000 sec  
TDO 1

----- CHANNEL f1 -----  
SFO1 100.5649900 MHz  
NUC1 13C  
P1 10.00 usec  
PLW1 44.46300125 W

----- CHANNEL f2 -----  
SFO2 399.9015996 MHz  
NUC2 1H  
CPDPRG[2] waltz16  
PCPD2 90.00 usec  
PLW2 7.59999990 W  
PLW12 0.20774999 W  
PLW13 0.16827001 W

F2 - Processing parameters  
SI 32768  
SF 100.5549213 MHz  
WDW EM  
SSB 0  
LB 1.00 Hz  
GB 0  
PC 1.40

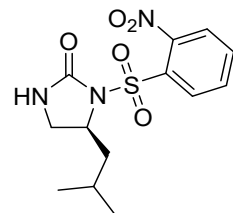

6  
<sup>1</sup>H NMR  
 400 MHz  
 CDCl<sub>3</sub>

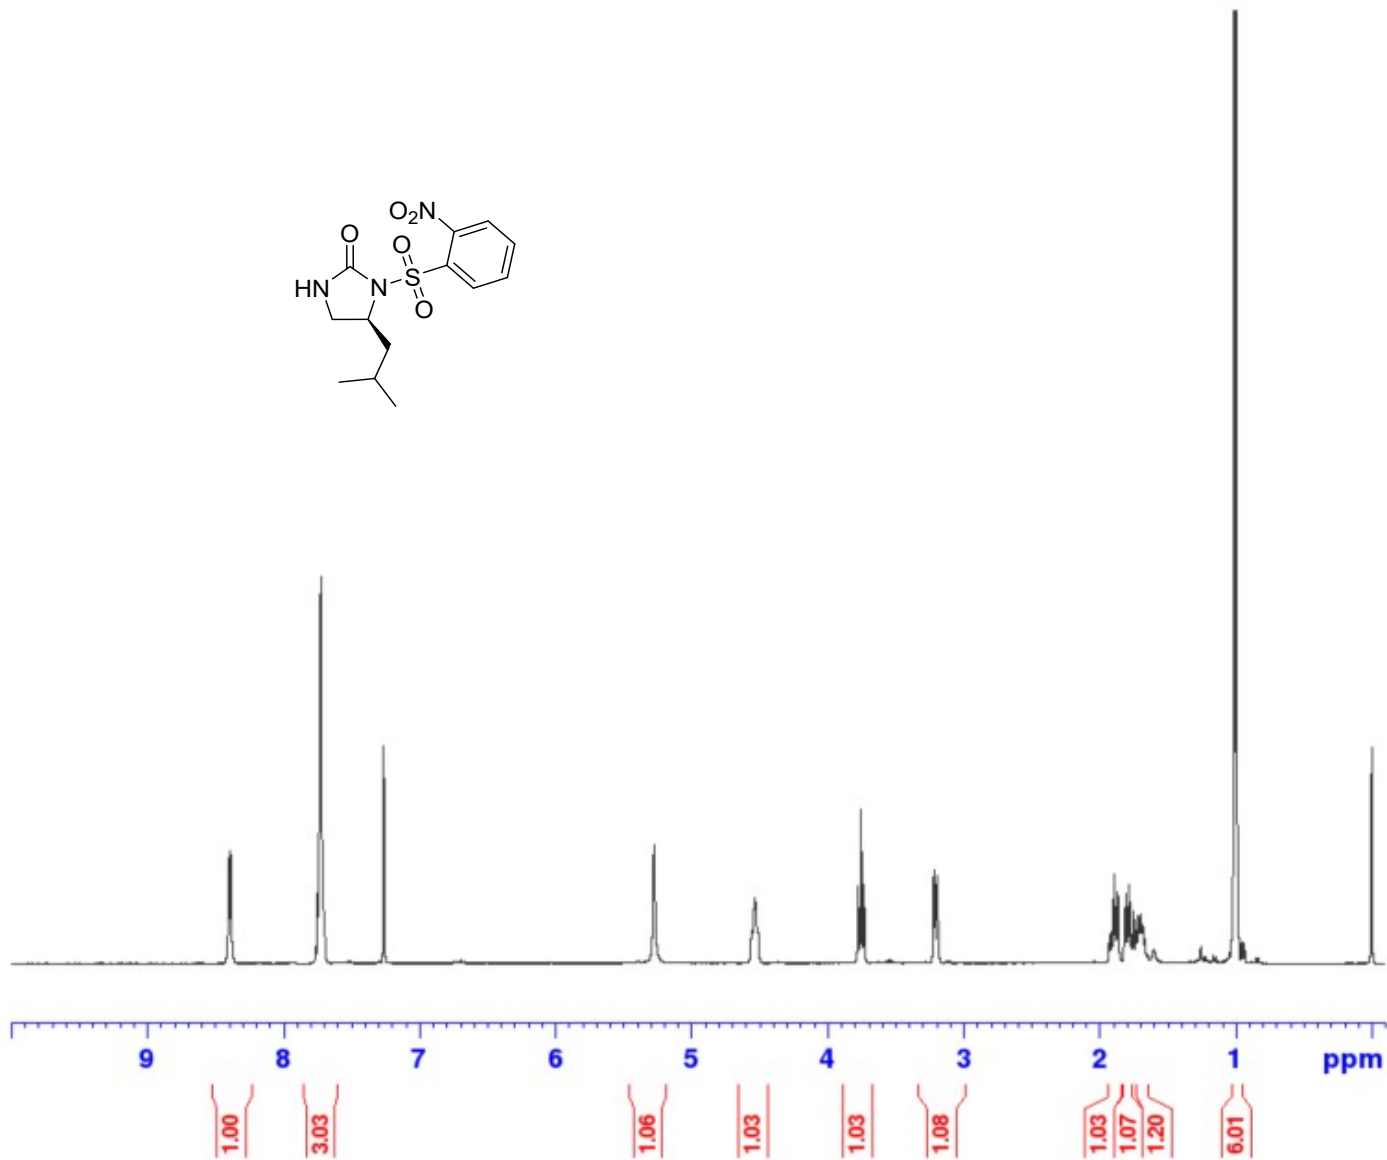

Current Data Parameters  
 NAME TW-A-139-B FULL  
 EXPNO 30  
 PROCNO 1

F2 - Acquisition Parameters  
 Date\_ 20190514  
 Time 3.12  
 INSTRUM spect  
 PROBHD 5 mm PABBO BB/  
 PULPROG zg30  
 TD 131072  
 SOLVENT CDCl3  
 NS 64  
 DS 0  
 SWH 12019.230 Hz  
 FIDRES 0.091699 Hz  
 AQ 5.4525952 sec  
 RG 203  
 DW 41.600 usec  
 DE 9.85 usec  
 TE 300.0 K  
 D1 0.10000000 sec  
 TDO 1

===== CHANNEL f1 =====  
 SFO1 399.9024695 MHz  
 NUC1 1H  
 P1 14.88 usec  
 PLW1 7.59999990 W

F2 - Processing parameters  
 SI 131072  
 SF 399.9000099 MHz  
 WDW EM  
 SSB 0  
 LB 0.10 Hz  
 GB 0  
 PC 1.00

6  
<sup>13</sup>C NMR  
 101 MHz  
 CDCl<sub>3</sub>

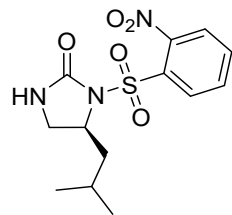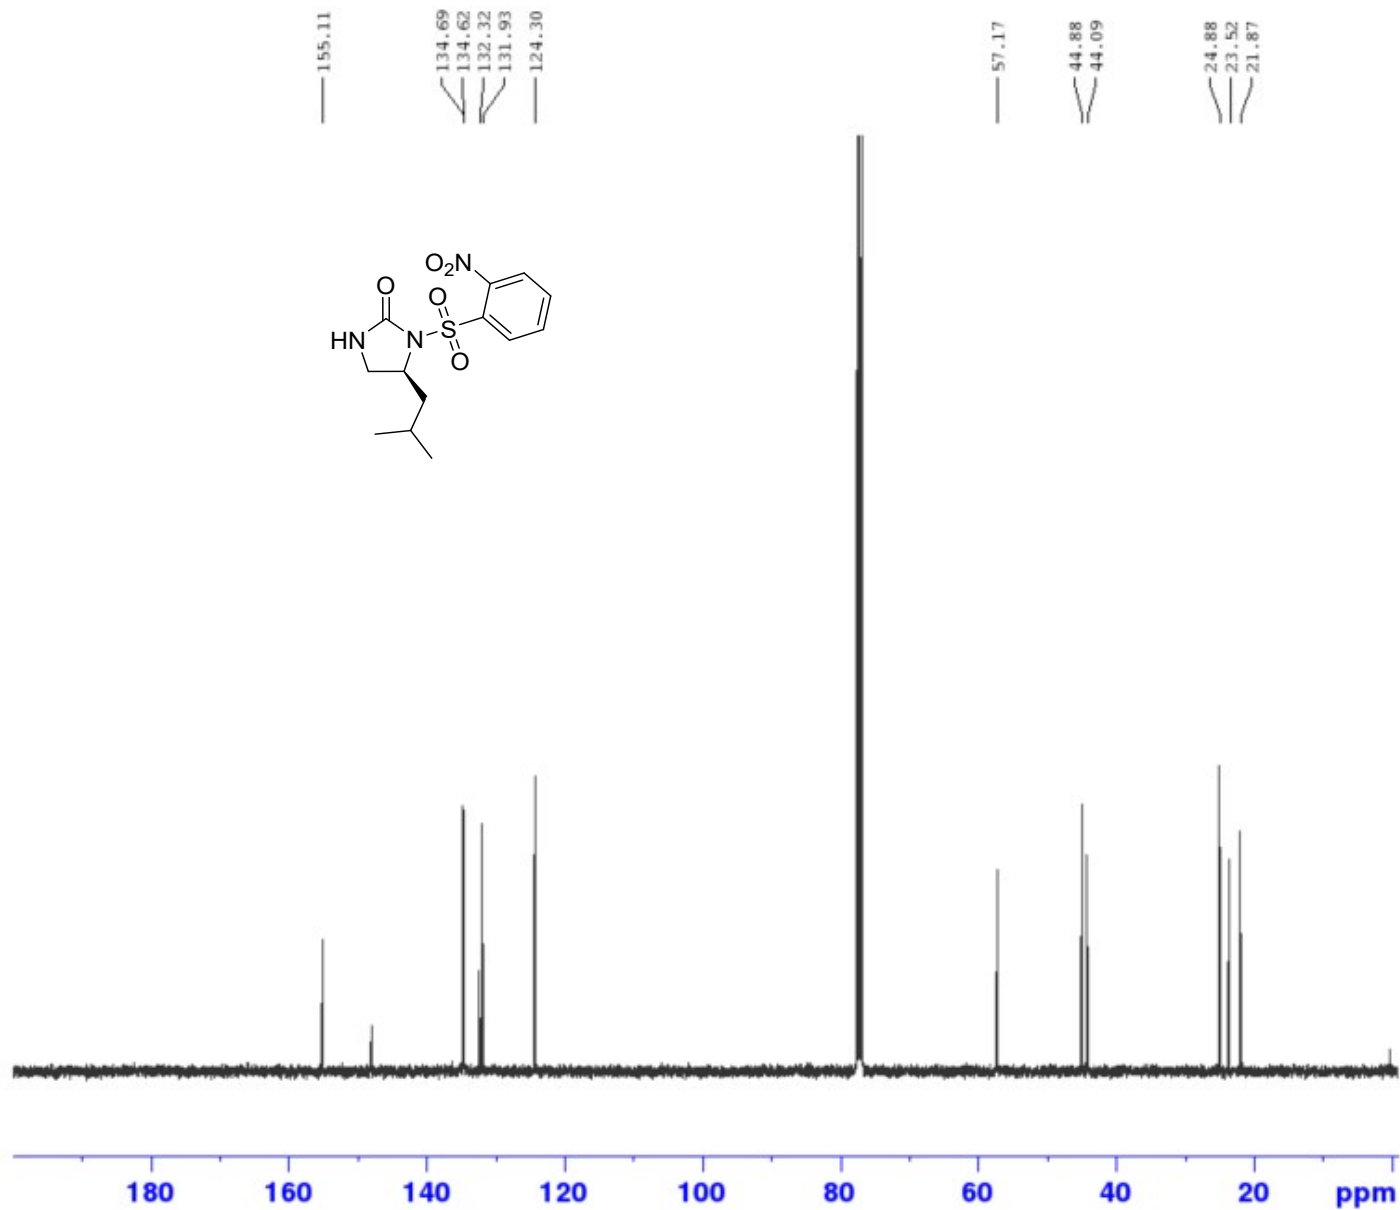

Current Data Parameters  
 NAME TW-A-139-B FULL  
 EXPNO 32  
 PROCNO 1

F2 - Acquisition Parameters  
 Date\_ 20190514  
 Time 4.12  
 INSTRUM spect  
 PROBHD 5 mm PABBO BB/  
 PULPROG zgpg30  
 TD 65536  
 SOLVENT CDC13  
 NS 1024  
 DS 4  
 SWH 24038.461 Hz  
 FIDRES 0.366798 Hz  
 AQ 1.3631488 sec  
 RG 203  
 DW 20.800 usec  
 DE 6.50 usec  
 TE 300.0 K  
 D1 2.00000000 sec  
 D11 0.03000000 sec  
 TDO 1

----- CHANNEL f1 -----  
 SFO1 100.5649900 MHz  
 NUC1 13C  
 P1 10.00 usec  
 PLW1 44.46300125 W

----- CHANNEL f2 -----  
 SFO2 399.9015996 MHz  
 NUC2 1H  
 CPDPRG[2] waltz16  
 PCPD2 90.00 usec  
 PLW2 7.599999990 W  
 PLW12 0.20774999 W  
 PLW13 0.16827001 W

F2 - Processing parameters  
 SI 32768  
 SF 100.5549219 MHz  
 WDW EM  
 SSB 0  
 LB 1.00 Hz  
 GB 0  
 PC 1.40

Current Data Parameters  
NAME TW-A-195-A  
EXPNO 10  
PROCNO 1

F2 - Acquisition Parameters  
Date\_ 20190424  
Time 14.02  
INSTRUM spect  
PROBHD 5 mm PABBO BB/  
PULPROG zg30  
TD 131072  
SOLVENT CDC13  
NS 16  
DS 0  
SWH 12019.230 Hz  
FIDRES 0.091699 Hz  
AQ 5.4525952 sec  
RG 203  
DW 41.600 usec  
DE 9.85 usec  
TE 300.0 K  
D1 0.1000000 sec  
TDO 1

----- CHANNEL f1 -----  
SFO1 399.9024695 MHz  
NUC1 1H  
P1 14.88 usec  
PLW1 7.59999990 W

F2 - Processing parameters  
SI 131072  
SF 399.9000096 MHz  
WDW EM  
SSB 0  
LB 0.10 Hz  
GB 0  
PC 1.00

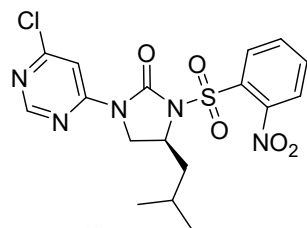

S17  
1H NMR  
400 MHz  
CDCl<sub>3</sub>

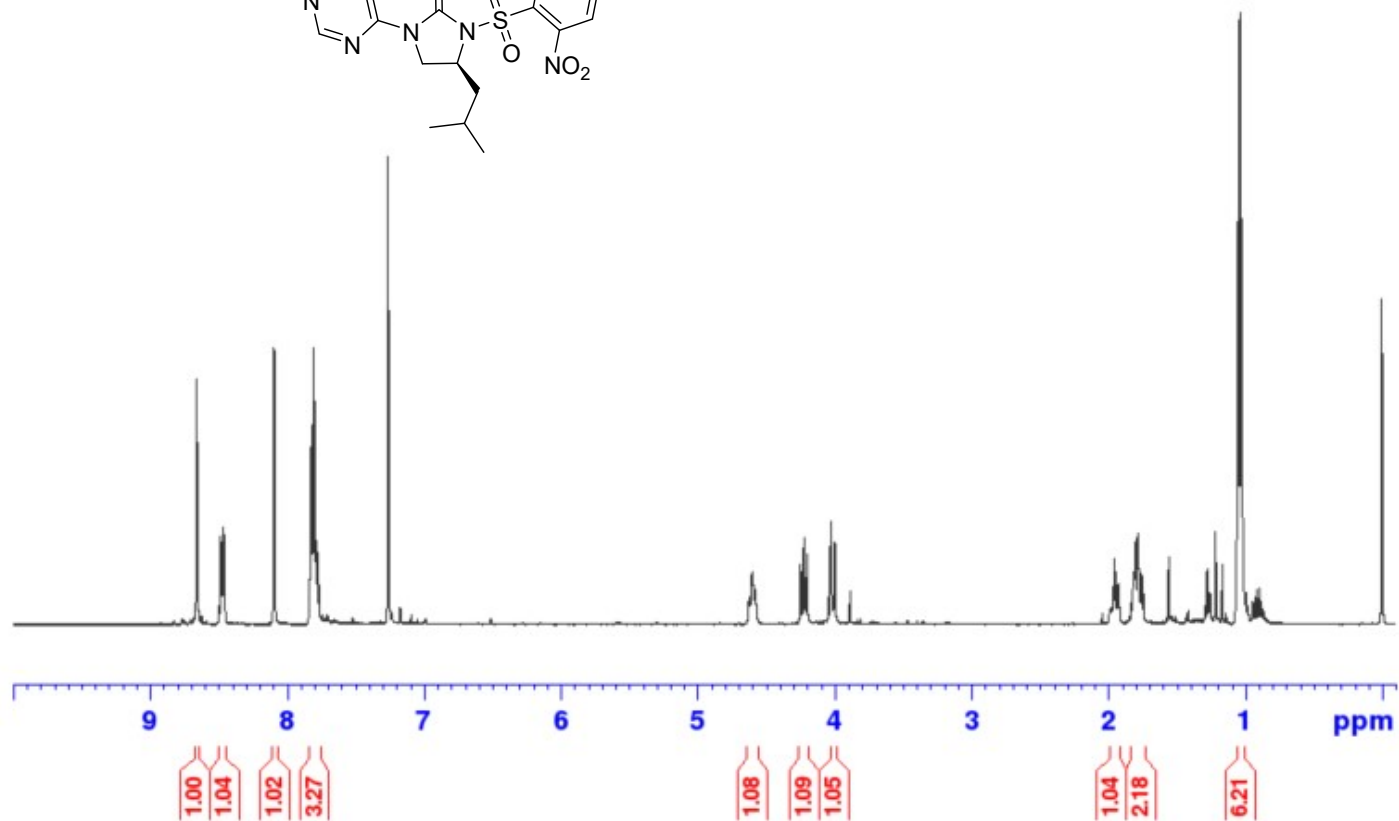

S17  
<sup>13</sup>C NMR  
101 MHz  
CDCl<sub>3</sub>

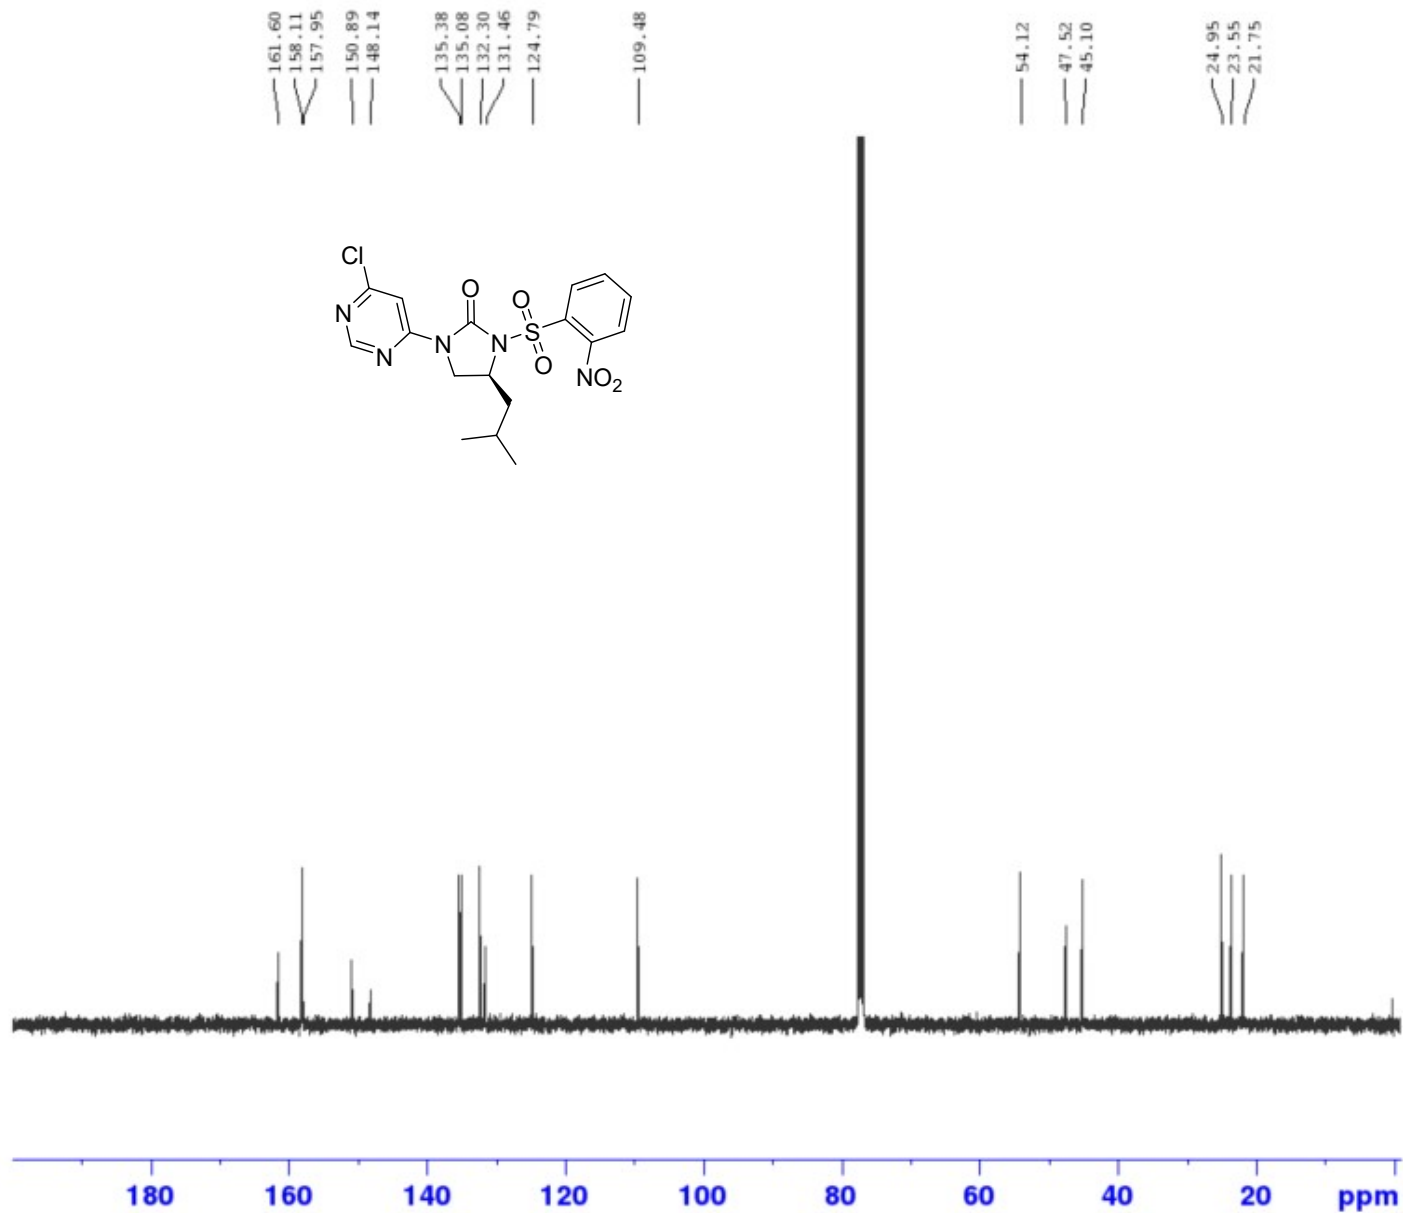

Current Data Parameters  
NAME TW-A-195-A  
EXPNO 14  
PROCNO 1

F2 - Acquisition Parameters  
Date\_ 20190424  
Time 20.04  
INSTRUM spect  
PROBHD 5 mm PABBO BB/  
PULPROG zgpg30  
TD 65536  
SOLVENT CDCl3  
NS 1024  
DS 4  
SWH 24038.461 Hz  
FIDRES 0.366798 Hz  
AQ 1.3631488 sec  
RG 203  
DW 20.800 usec  
DE 6.50 usec  
TE 300.0 K  
D1 2.00000000 sec  
D11 0.03000000 sec  
TD0 1

----- CHANNEL f1 -----  
SFO1 100.5649900 MHz  
NUC1 13C  
P1 10.00 usec  
PLW1 44.46300125 W

----- CHANNEL f2 -----  
SFO2 399.9015996 MHz  
NUC2 1H  
CPDPRG[2] waltz16  
PCPD2 90.00 usec  
PLW2 7.59999990 W  
PLW12 0.20774999 W  
PLW13 0.16827001 W

F2 - Processing parameters  
SI 32768  
SF 100.5549209 MHz  
WDW EM  
SSB 0  
LB 1.00 Hz  
GB 0  
PC 1.40

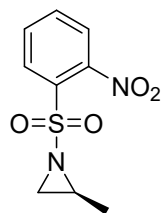

Current Data Parameters  
 NAME RK1-83-1  
 EXPNO 10  
 PROCNO 1

F2 - Acquisition Parameters  
 Date\_ 20181128  
 Time 16.16  
 INSTRUM spect  
 PROBHD 5 mm PABBO BB/  
 PULPROG zg30  
 TD 131072  
 SOLVENT CDCl3  
 NS 16  
 DS 0  
 SWH 12019.230 Hz  
 FIDRES 0.091699 Hz  
 AQ 5.4525952 sec  
 RG 90.5  
 DW 41.600 usec  
 DE 9.85 usec  
 TE 298.1 K  
 D1 0.10000000 sec  
 TDO 1

===== CHANNEL f1 =====  
 SFO1 399.9024695 MHz  
 NUC1 1H  
 P1 14.88 usec  
 PLW1 7.59999990 W

F2 - Processing parameters  
 SI 131072  
 SF 399.9000059 MHz  
 WDW EM  
 SSB 0  
 LB 0.10 Hz  
 GB 0  
 PC 1.00

S18  
<sup>1</sup>H NMR  
 400 MHz  
 CDCl<sub>3</sub>

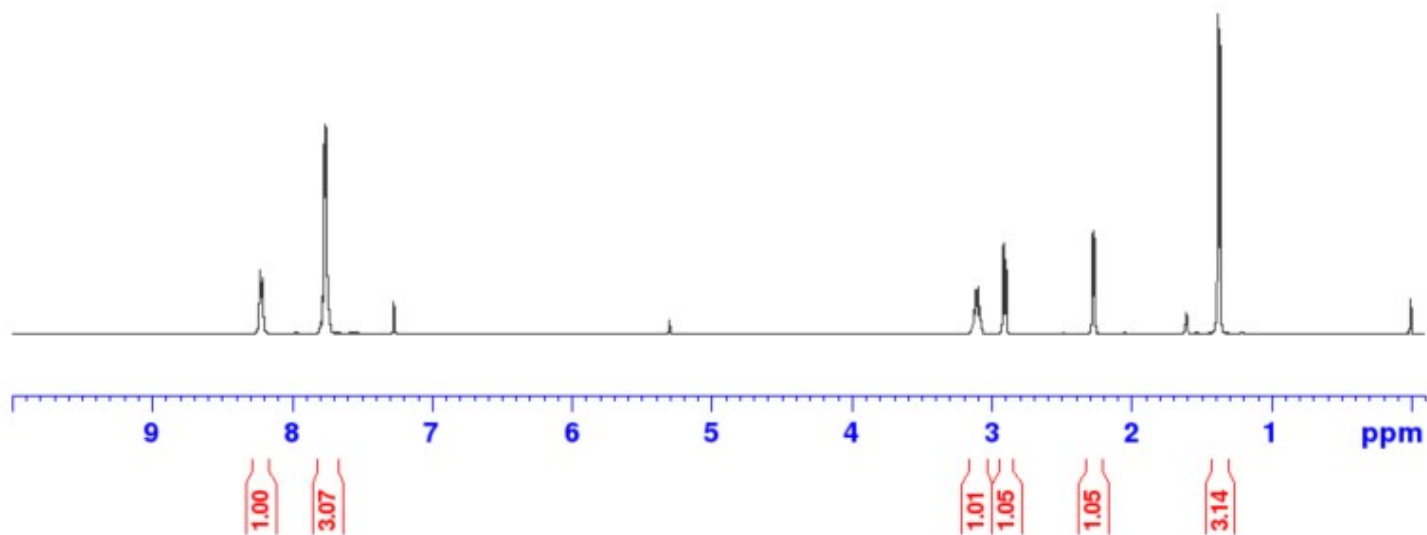



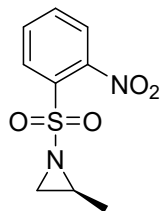

S18

<sup>13</sup>C NMR

101 MHz

CDCl<sub>3</sub>

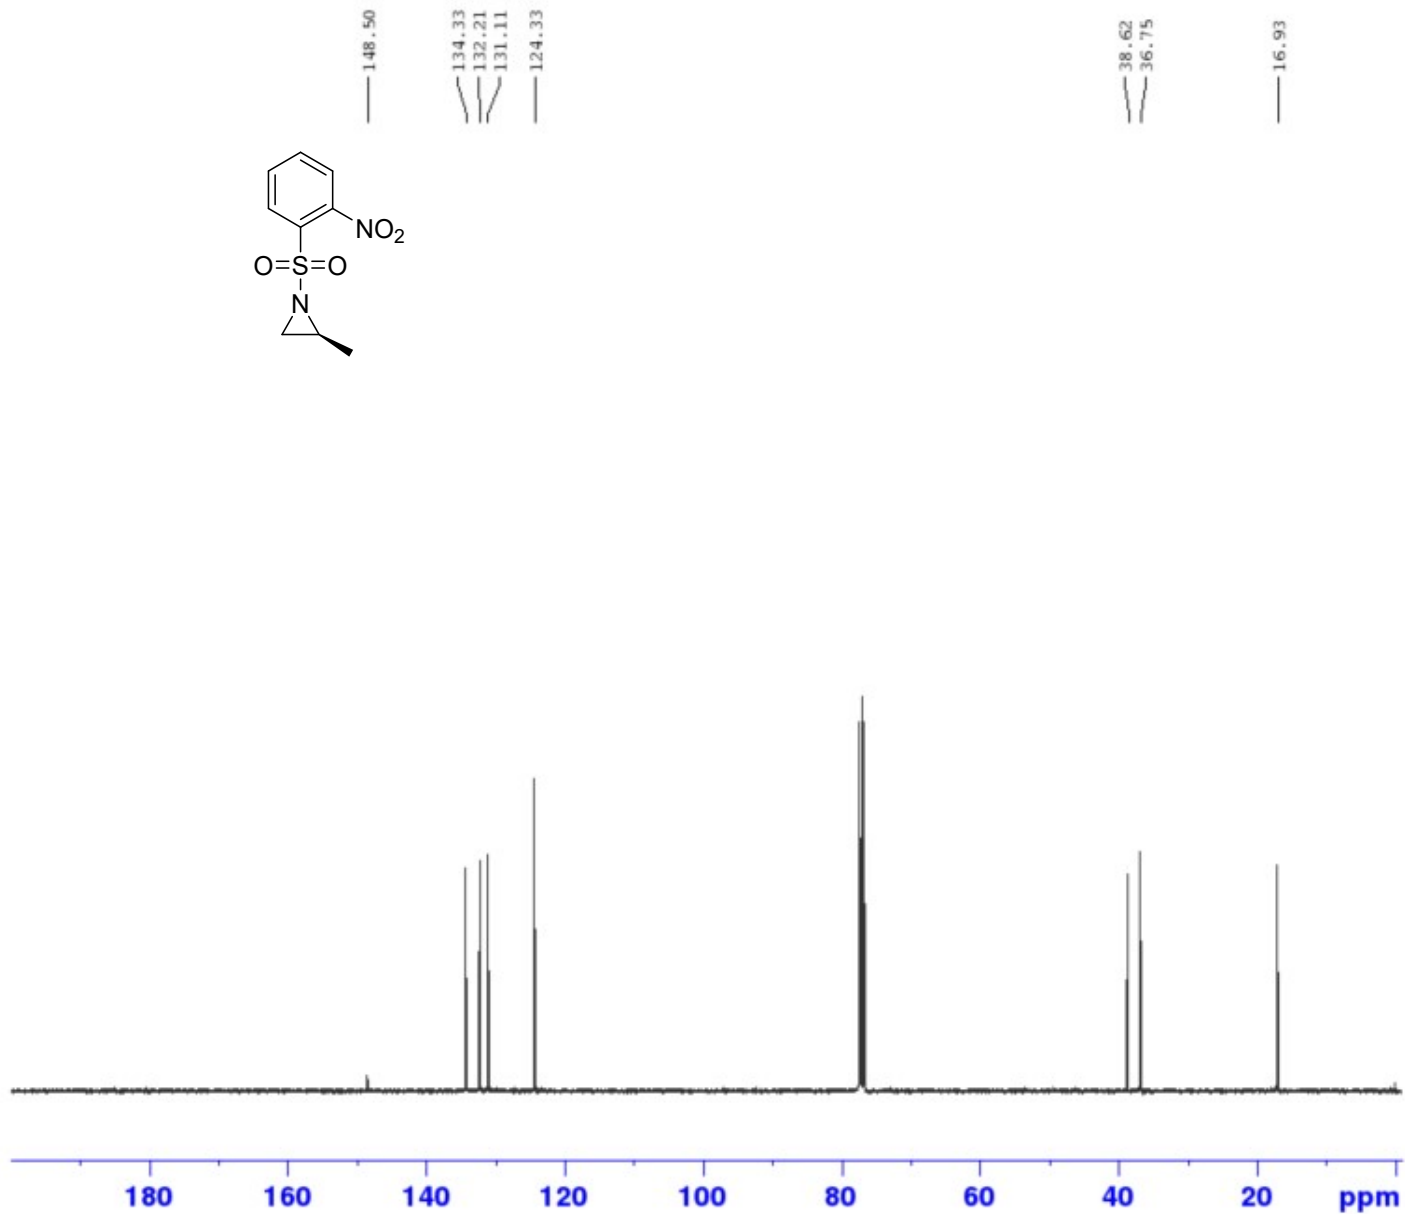

Current Data Parameters  
 NAME RK1-83-1  
 EXPNO 11  
 PROCNO 1

F2 - Acquisition Parameters  
 Date\_ 20181128  
 Time 21.17  
 INSTRUM spect  
 PROBHD 5 mm PABBO BB/  
 PULPROG zgpg30  
 TD 65536  
 SOLVENT CDCl3  
 NS 1024  
 DS 4  
 SWH 24038.461 Hz  
 FIDRES 0.366798 Hz  
 AQ 1.3631488 sec  
 RG 203  
 DW 20.800 usec  
 DE 6.50 usec  
 TE 298.6 K  
 D1 2.00000000 sec  
 D11 0.03000000 sec  
 TDO 1

----- CHANNEL f1 -----  
 SFO1 100.5649900 MHz  
 NUC1 13C  
 P1 10.00 usec  
 PLW1 44.46300125 W

----- CHANNEL f2 -----  
 SFO2 399.9015996 MHz  
 NUC2 1H  
 CPDPRG[2] waltz16  
 PCPD2 90.00 usec  
 PLW2 7.59999990 W  
 PLW12 0.20774999 W  
 PLW13 0.16827001 W

F2 - Processing parameters  
 SI 32768  
 SF 100.5549353 MHz  
 WDW EM  
 SSB 0  
 LB 1.00 Hz  
 GB 0  
 PC 1.40

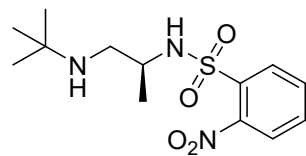

S19  
<sup>1</sup>H NMR  
 400 MHz  
 CDCl<sub>3</sub>

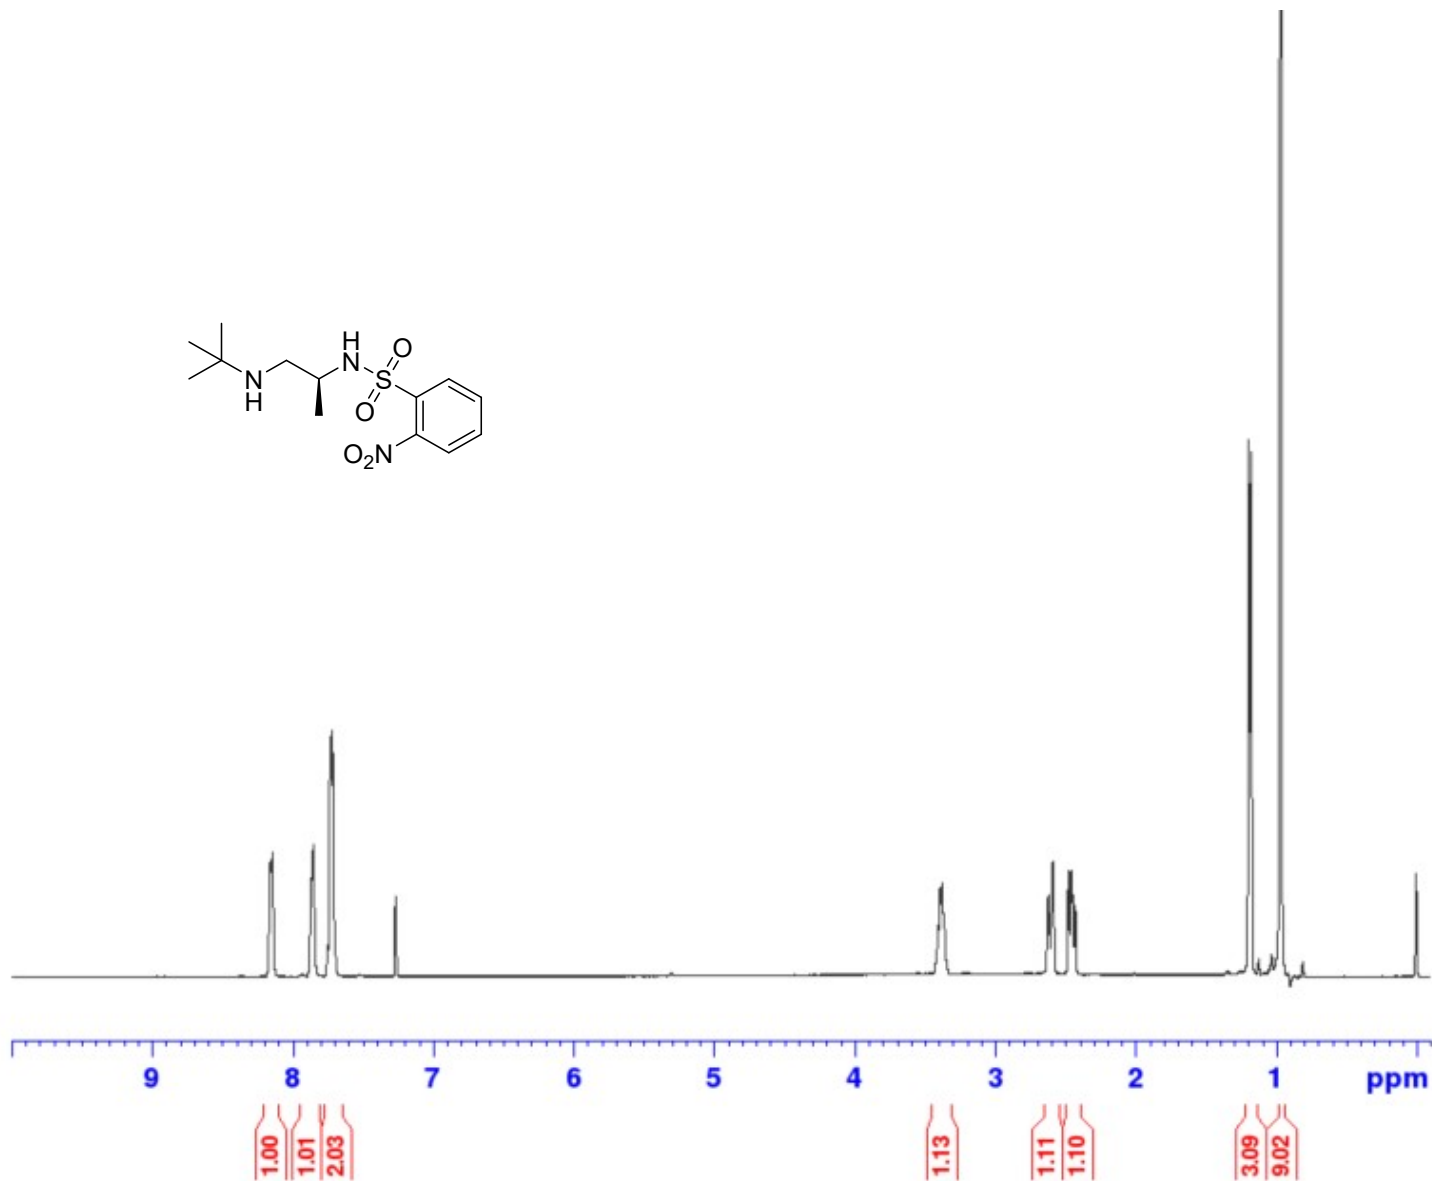

Current Data Parameters  
 NAME RKL-89-recrys  
 EXPNO 10  
 PROCNO 1

F2 - Acquisition Parameters  
 Date\_ 20190108  
 Time 17.53  
 INSTRUM spect  
 PROBHD 5 mm PABBO BB/  
 PULPROG zg30  
 TD 131072  
 SOLVENT CDCl3  
 NS 16  
 DS 0  
 SWH 12019.230 Hz  
 FIDRES 0.091699 Hz  
 AQ 5.4525952 sec  
 RG 90.5  
 DW 41.600 usec  
 DE 9.85 usec  
 TE 300.0 K  
 D1 0.10000000 sec  
 TDO 1

===== CHANNEL f1 =====  
 SFO1 399.9024695 MHz  
 NUC1 1H  
 P1 14.88 usec  
 PLW1 7.59999990 W

F2 - Processing parameters  
 SI 131072  
 SF 399.9000070 MHz  
 WDW EM  
 SSB 0  
 LB 0.10 Hz  
 GB 0  
 PC 1.00

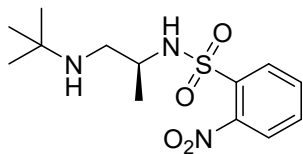

S19  
<sup>13</sup>C NMR  
 101 MHz  
 CDCl<sub>3</sub>

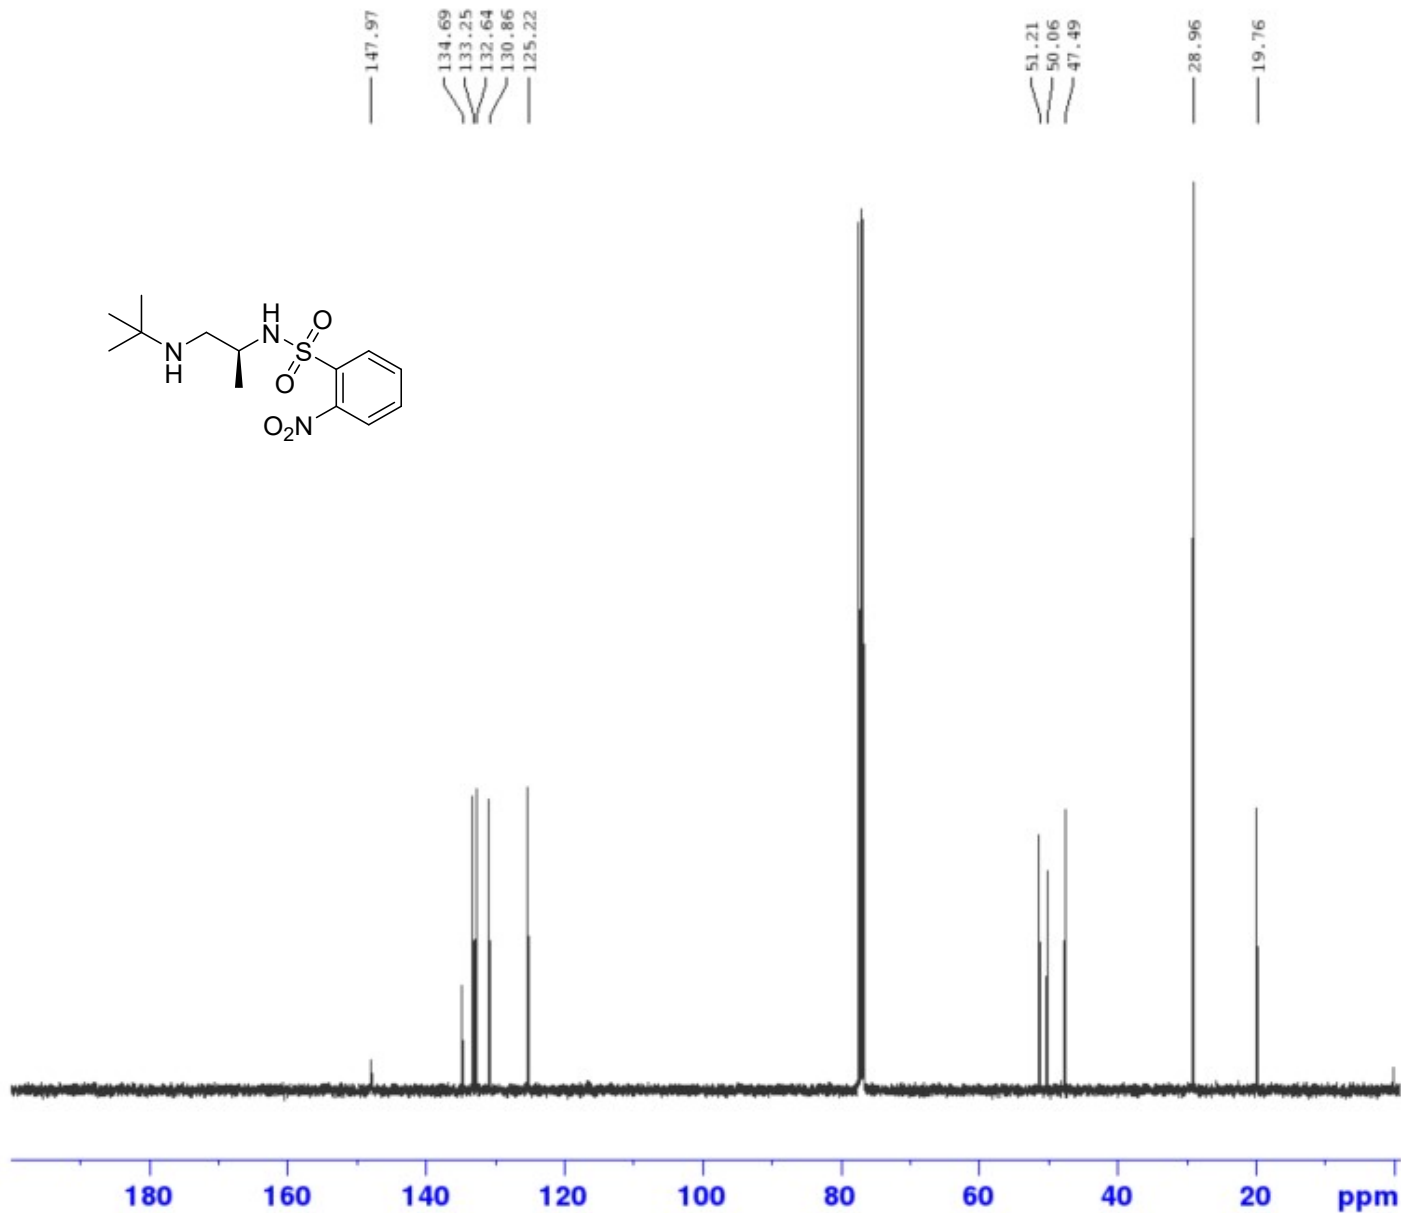

Current Data Parameters  
 NAME RK1-89-recrys  
 EXPNO 14  
 PROCNO 1

F2 - Acquisition Parameters  
 Date\_ 20190108  
 Time\_ 20.49  
 INSTRUM spect  
 PROBHD 5 mm PABBO BB/  
 PULPROG zgpg30  
 TD 119044  
 SOLVENT CDC13  
 NS 512  
 DS 4  
 SWH 25000.000 Hz  
 FIDRES 0.210006 Hz  
 AQ 2.3808801 sec  
 RG 2050  
 DW 20.000 usec  
 DE 9.12 usec  
 TE 300.0 K  
 D1 1.00000000 sec  
 D11 0.03000000 sec  
 TDO 1

----- CHANNEL f1 -----  
 SFO1 100.5659947 MHz  
 NUC1 13C  
 P1 10.00 usec  
 PLW1 44.46300125 W

----- CHANNEL f2 -----  
 SFO2 399.9015996 MHz  
 NUC2 1H  
 CPDPRG[2] waltz64  
 PCPD2 90.00 usec  
 PLW2 7.59999990 W  
 PLW12 0.20774999 W  
 PLW13 0.16827001 W

F2 - Processing parameters  
 SI 131072  
 SF 100.5549350 MHz  
 WDW EM  
 SSB 0  
 LB 1.00 Hz  
 GB 0  
 PC 1.40

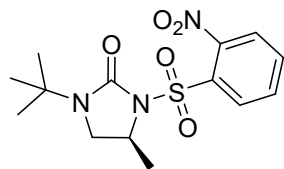

S20  
<sup>1</sup>H NMR  
 400 MHz  
 CDCl<sub>3</sub>

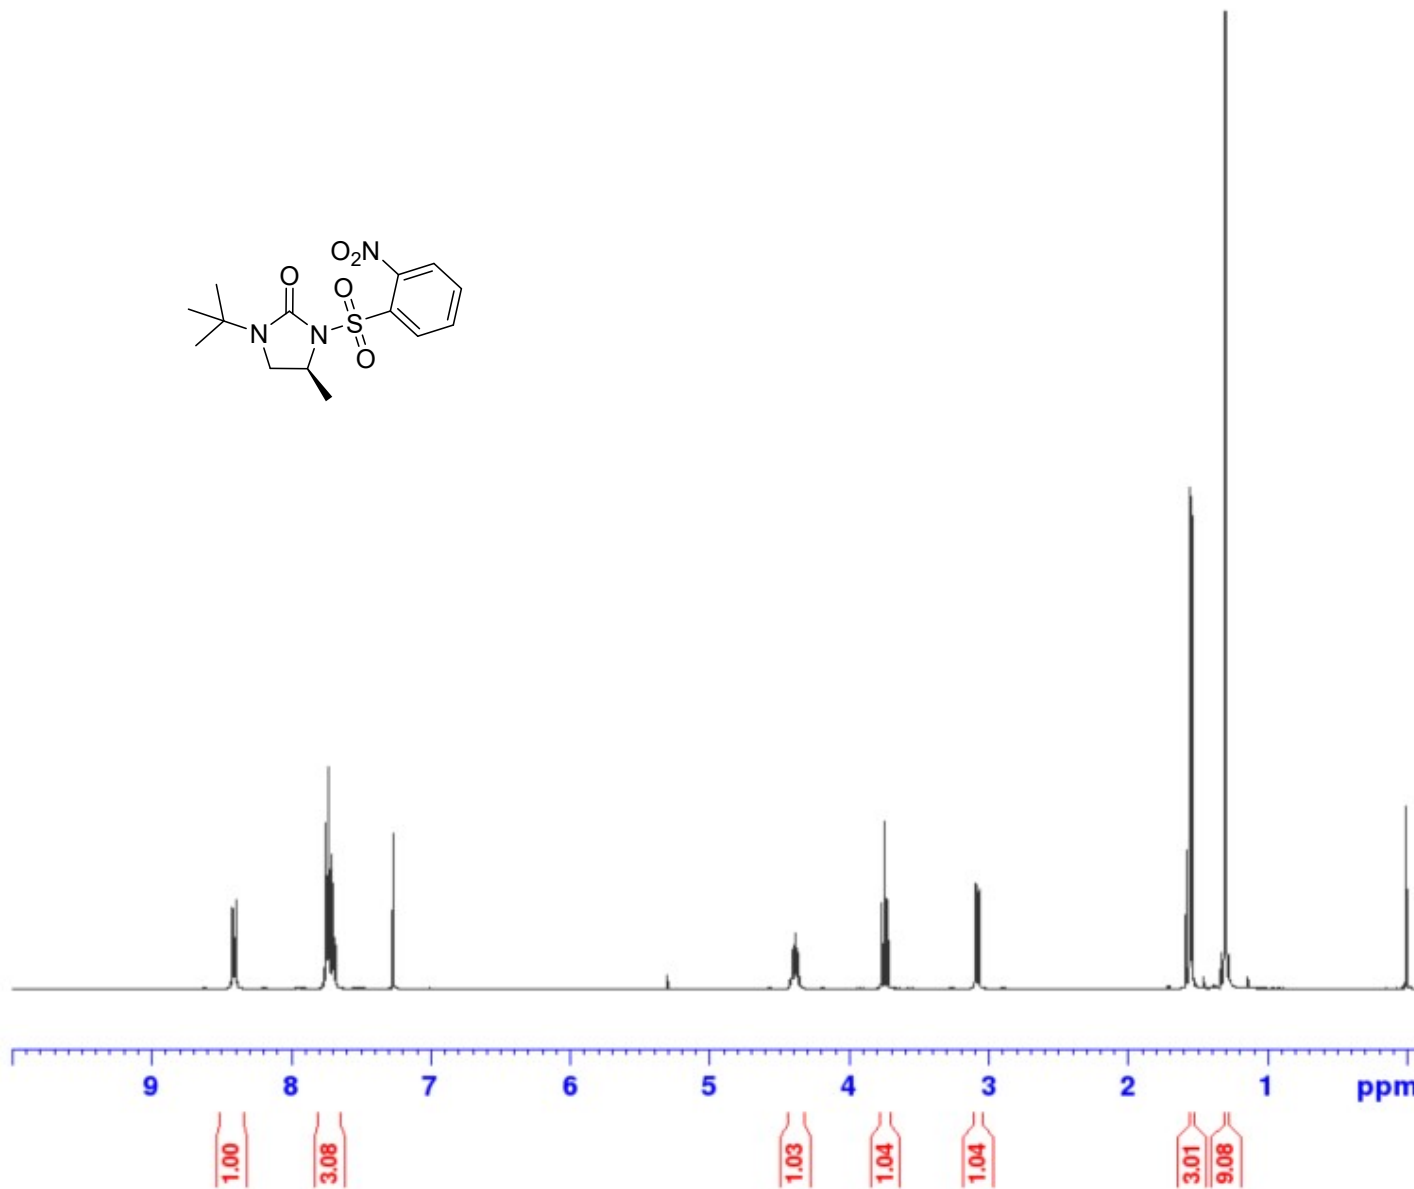

Current Data Parameters  
 NAME RKL-108-1  
 EXPNO 10  
 PROCNO 1

F2 - Acquisition Parameters  
 Date\_ 20190321  
 Time 13.27  
 INSTRUM AVIII\_400  
 PROBHD 5 mm PABBO BB-  
 PULPROG zg30  
 TD 65536  
 SOLVENT CDCl3  
 NS 16  
 DS 2  
 SWH 8223.685 Hz  
 FIDRES 0.125483 Hz  
 AQ 3.9845889 sec  
 RG 144  
 DW 60.800 usec  
 DE 16.82 usec  
 TE 300.0 K  
 D1 1.00000000 sec  
 TDO 1

----- CHANNEL f1 -----  
 SFO1 400.1124708 MHz  
 NUC1 1H  
 P1 15.00 usec  
 PLW1 17.29199982 W

F2 - Processing parameters  
 SI 32768  
 SF 400.1100077 MHz  
 WDW EM  
 SSB 0  
 LB 0.30 Hz  
 GB 0  
 PC 1.00

S20  
13C NMR  
101 MHz  
CDCl3

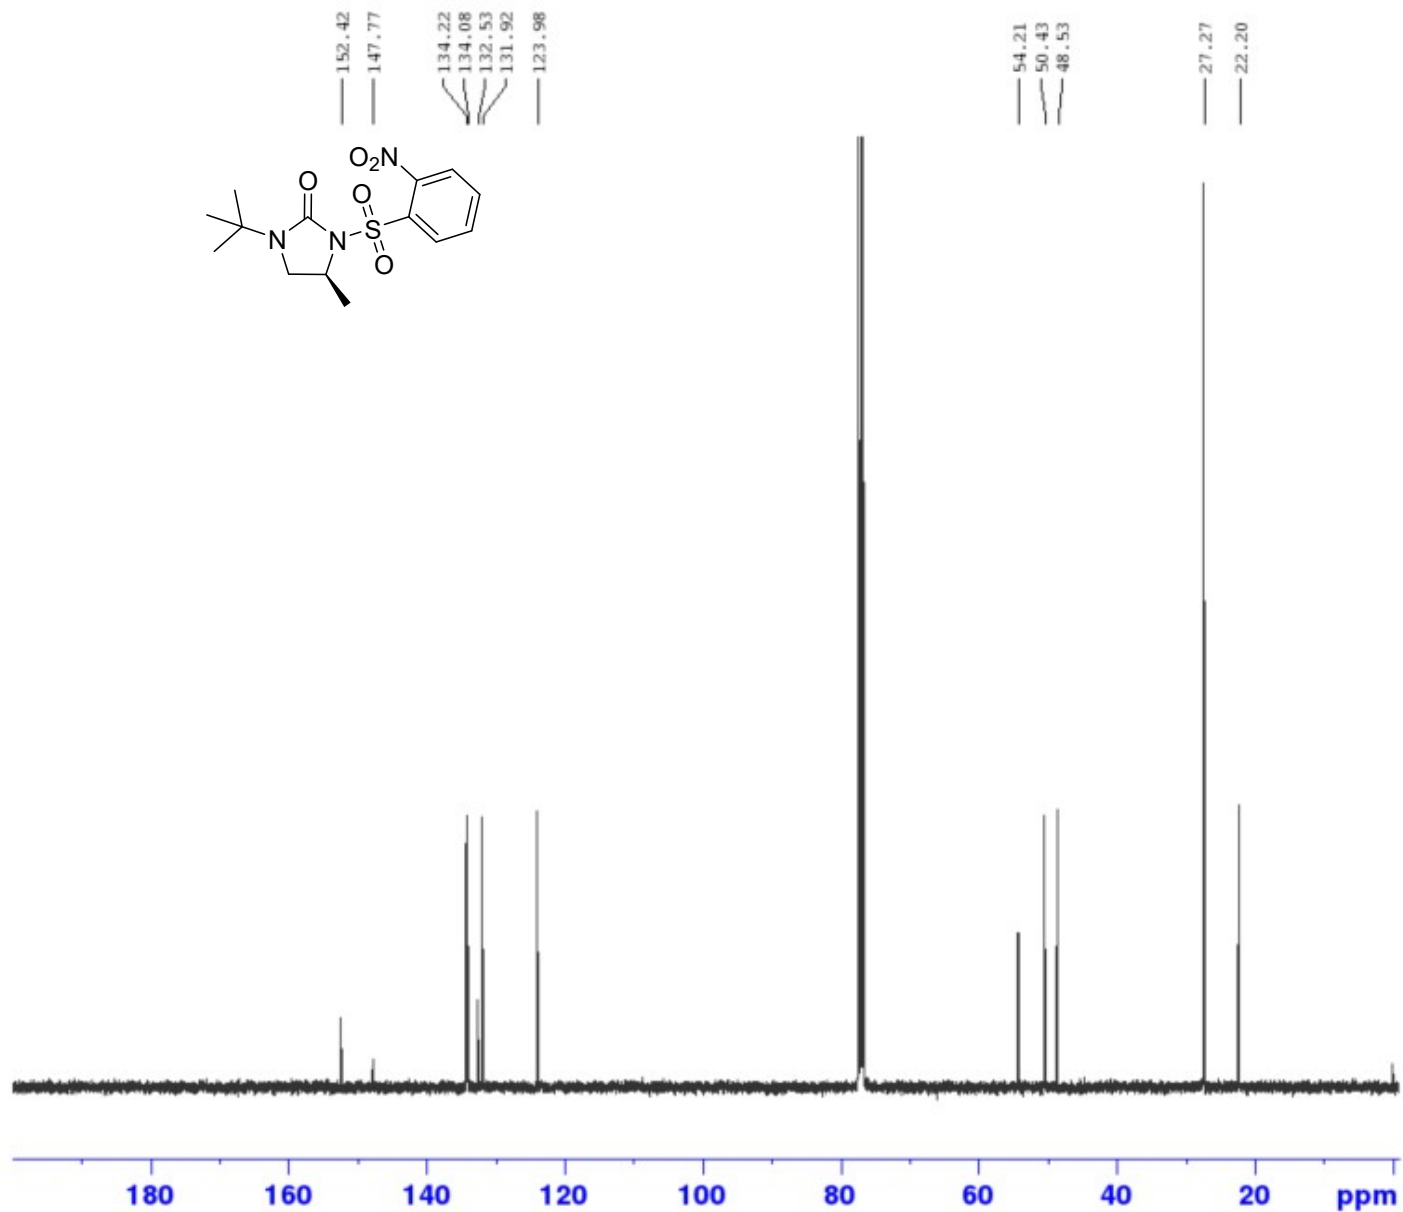

Current Data Parameters  
NAME RK1-108-1  
EXPNO 22  
PROCNO 1

F2 - Acquisition Parameters  
Date\_ 20190322  
Time 19.59  
INSTRUM AVIII\_400  
PROBHD 5 mm PABBO BB-  
PULPROG zgpg30  
TD 96150  
SOLVENT CDCl3  
NS 1024  
DS 4  
SWH 24038.461 Hz  
FIDRES 0.250010 Hz  
AQ 1.9999200 sec  
RG 2050  
DW 20.800 usec  
DE 6.50 usec  
TE 300.0 K  
D1 1.00000000 sec  
D11 0.03000000 sec  
TDO 1

----- CHANNEL f1 -----  
SFO1 100.6178003 MHz  
NUC1 13C  
P1 9.00 usec  
PLW1 96.68000031 W

----- CHANNEL f2 -----  
SFO2 400.1116004 MHz  
NUC2 1H  
CPDPRG[2] waltz64  
PCPD2 90.00 usec  
PLW2 17.29199982 W  
PLW12 0.48032999 W  
PLW13 0.24160001 W

F2 - Processing parameters  
SI 131072  
SF 100.6077400 MHz  
WDW EM  
SSB 0  
LB 1.00 Hz  
GB 0  
PC 1.40

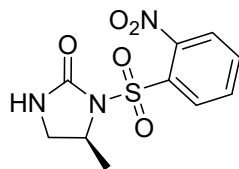

7  
<sup>1</sup>H NMR  
 400 MHz  
 CDCl<sub>3</sub>

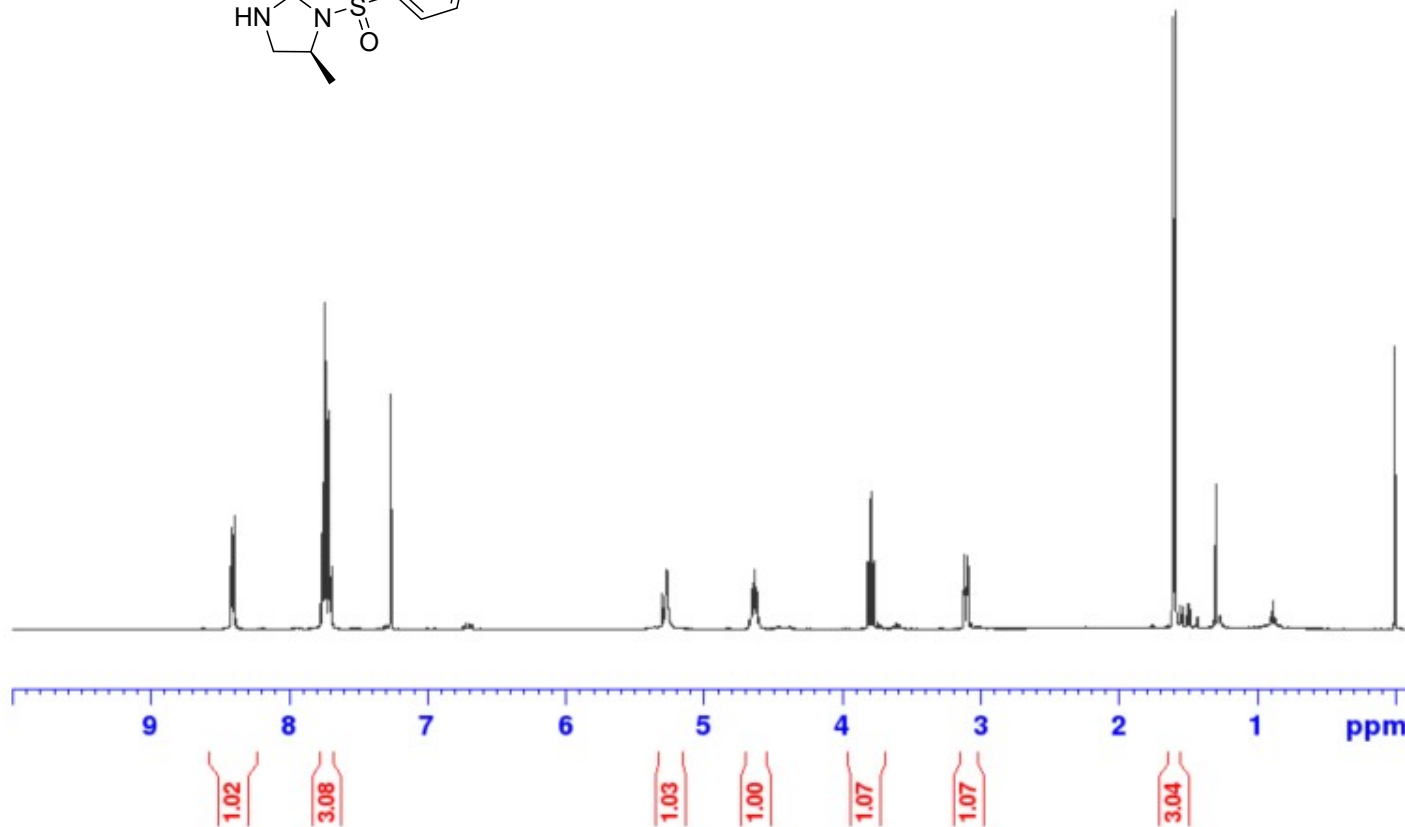

Current Data Parameters  
 NAME RK1-112-1  
 EXPNO 10  
 PROCNO 1

F2 - Acquisition Parameters  
 Date\_ 20190328  
 Time 12.24  
 INSTRUM AVIII\_400  
 PROBHD 5 mm PABBO BB-  
 PULPROG zg30  
 TD 65536  
 SOLVENT CDC13  
 NS 16  
 DS 2  
 SWH 8223.685 Hz  
 FIDRES 0.125483 Hz  
 AQ 3.9845889 sec  
 RG 181  
 DW 60.800 usec  
 DE 16.82 usec  
 TE 300.0 K  
 D1 1.00000000 sec  
 TDO 1

----- CHANNEL f1 -----  
 SFO1 400.1124708 MHz  
 NUC1 1H  
 P1 15.00 usec  
 PLW1 17.29199982 W

F2 - Processing parameters  
 SI 32768  
 SF 400.1100083 MHz  
 WDW EM  
 SSB 0  
 LB 0.30 Hz  
 GB 0  
 PC 1.00

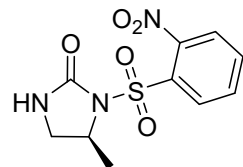

7  
<sup>13</sup>C NMR  
 101 MHz  
 CDCl<sub>3</sub>

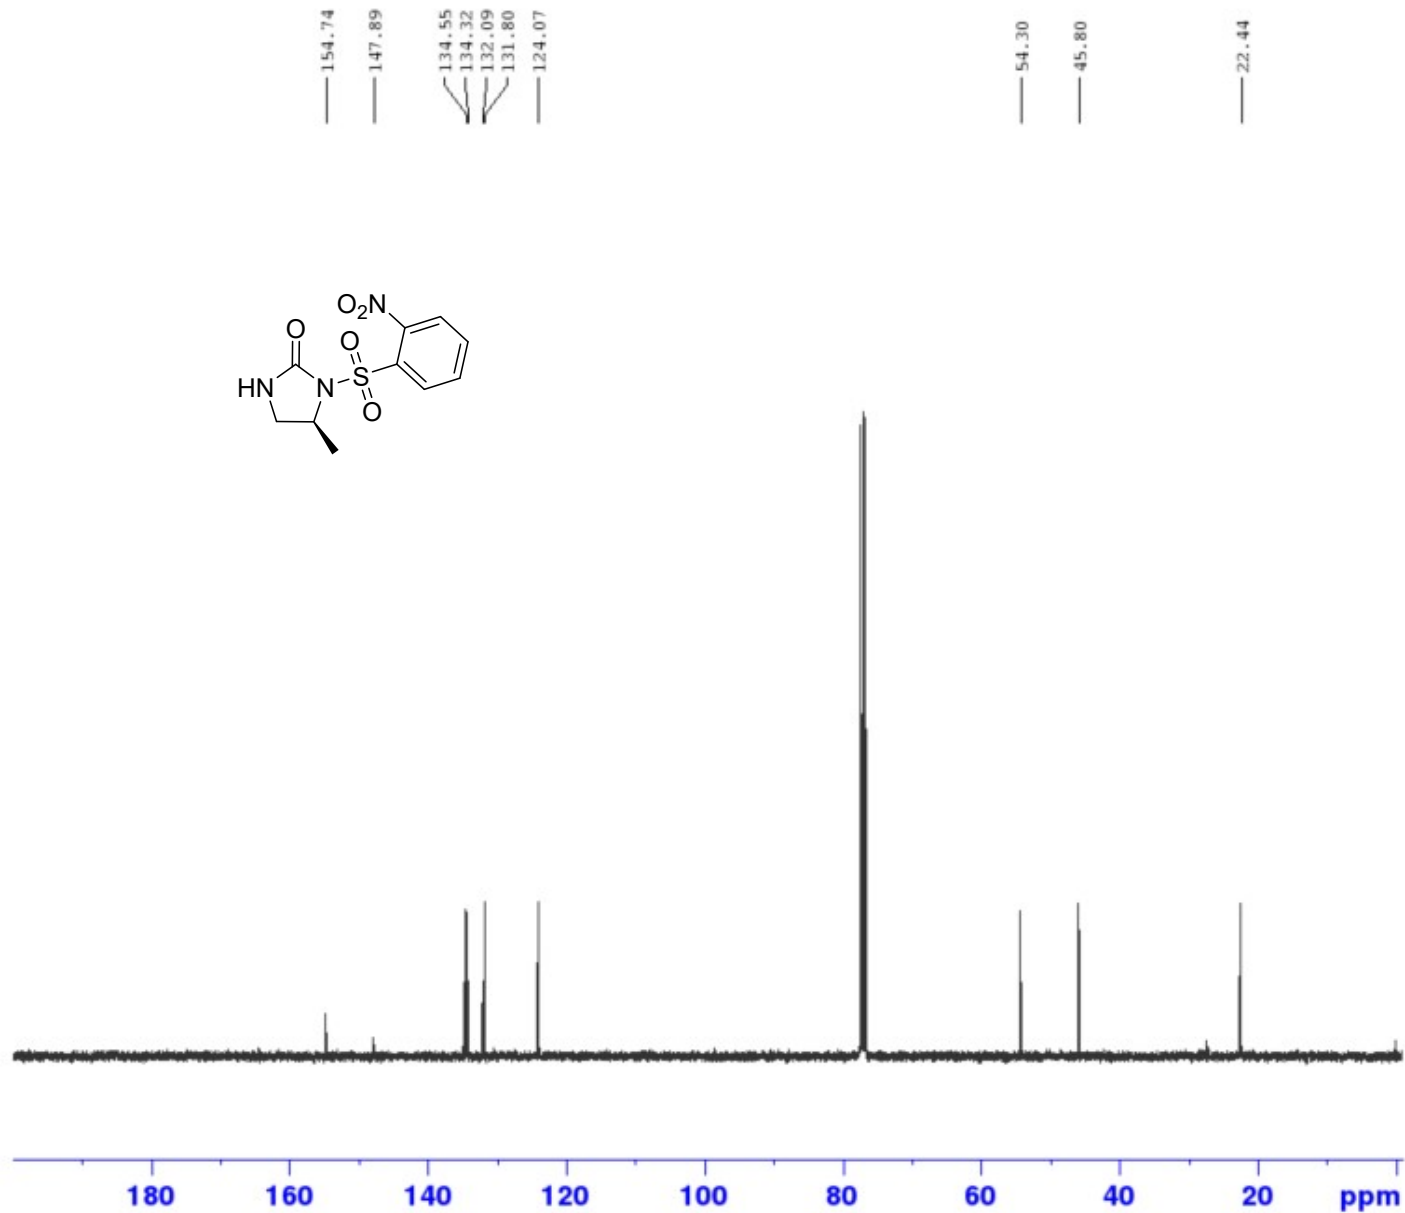

Current Data Parameters  
 NAME RK1-112-1  
 EXPNO 11  
 PROCNO 1

F2 - Acquisition Parameters  
 Date\_ 20190328  
 Time 12.51  
 INSTRUM AVIII\_400  
 PROBHD 5 mm PABBO BB-  
 PULPROG zgpg30  
 TD 96150  
 SOLVENT CDCl3  
 NS 512  
 DS 4  
 SWH 24038.461 Hz  
 FIDRES 0.250010 Hz  
 AQ 1.9999200 sec  
 RG 2050  
 DW 20.800 usec  
 DE 6.50 usec  
 TE 300.0 K  
 D1 1.0000000 sec  
 D11 0.03000000 sec  
 TDO 1

----- CHANNEL f1 -----  
 SFO1 100.6178003 MHz  
 NUC1 13C  
 P1 9.00 usec  
 PLW1 96.68000031 W

----- CHANNEL f2 -----  
 SFO2 400.1116004 MHz  
 NUC2 1H  
 CPDPRG[2] waltz64  
 PCPD2 90.00 usec  
 PLW2 17.29199982 W  
 PLW12 0.48032999 W  
 PLW13 0.24160001 W

F2 - Processing parameters  
 SI 131072  
 SF 100.6077400 MHz  
 WDW EM  
 SSB 0  
 LB 1.00 Hz  
 GB 0  
 PC 1.40

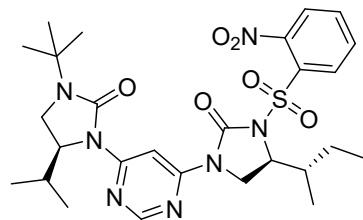

Current Data Parameters  
 NAME TW-A-177-A RERUN  
 EXPNO 10  
 PROCNO 1

F2 - Acquisition Parameters  
 Date\_ 20190426  
 Time 20.14  
 INSTRUM spect  
 PROBHD 5 mm PABBO BB/  
 PULPROG zg30  
 TD 131072  
 SOLVENT CDCl3  
 NS 64  
 DS 0  
 SWH 12019.230 Hz  
 FIDRES 0.091699 Hz  
 AQ 5.4525952 sec  
 RG 203  
 DW 41.600 usec  
 DE 9.85 usec  
 TE 300.0 K  
 D1 0.10000000 sec  
 TD0 1

----- CHANNEL f1 -----  
 SFO1 399.9024695 MHz  
 NUC1 1H  
 P1 14.88 usec  
 PLW1 7.59999990 W

F2 - Processing parameters  
 SI 131072  
 SF 399.9000097 MHz  
 WDW EM  
 SSB 0  
 LB 0.10 Hz  
 GB 0  
 PC 1.00

S21  
<sup>1</sup>H NMR  
 400 MHz  
 CDCl<sub>3</sub>

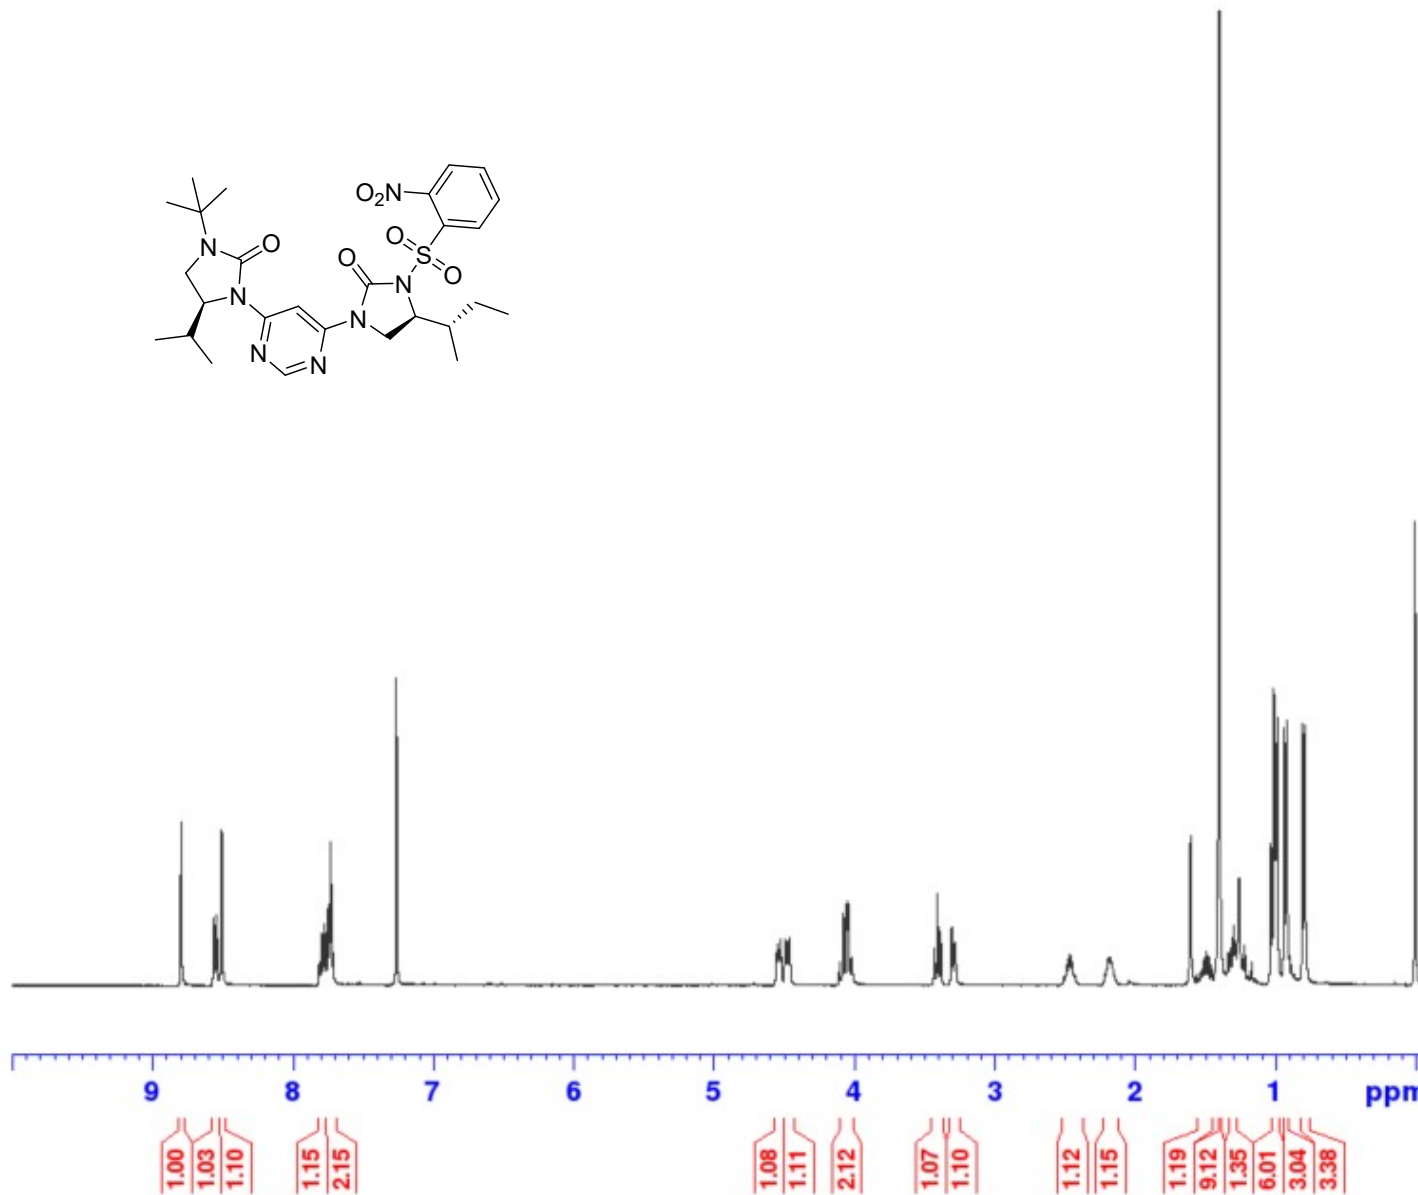



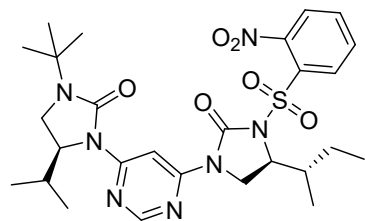

158.79  
157.07  
156.82  
155.91  
150.98  
148.16  
135.60  
134.90  
132.38  
131.91  
124.42  
96.61  
58.40  
54.90  
53.97  
42.83  
40.42  
39.31  
28.47  
27.72  
25.45  
18.36  
14.53  
11.97  
11.94

Current Data Parameters  
 NAME TW-A-177 600  
 EXPNO 112  
 PROCNO 1  
 F2 - Acquisition Parameters  
 Date\_ 20190831  
 Time 16.39  
 INSTRUM spect  
 PROBHD 5 mm PABBO BB/  
 PULPROG zgpg30  
 TD 65536  
 SOLVENT CDC13  
 NS 1024  
 DS 4  
 SWH 36057.691 Hz  
 FIDRES 0.550197 Hz  
 AQ 0.9087659 sec  
 RG 186.92  
 DW 13.867 usec  
 DE 6.50 usec  
 TE 300.0 K  
 D1 2.00000000 sec  
 D11 0.03000000 sec  
 TDO 1

===== CHANNEL f1 =====  
 SFO1 150.9178981 MHz  
 NUC1 13C  
 P1 11.80 usec  
 PLW1 85.00000000 W

===== CHANNEL f2 =====  
 SFO2 600.1324005 MHz  
 NUC2 1H  
 CPDPRG[2] waltz16  
 PCPD2 80.00 usec  
 PLW2 27.00000000 W  
 PLW12 0.43891999 W  
 PLW13 0.28090999 W

F2 - Processing parameters  
 SI 32768  
 SF 150.9027878 MHz  
 WDW EM  
 SSB 0  
 LB 1.00 Hz  
 GB 0  
 PC 1.40

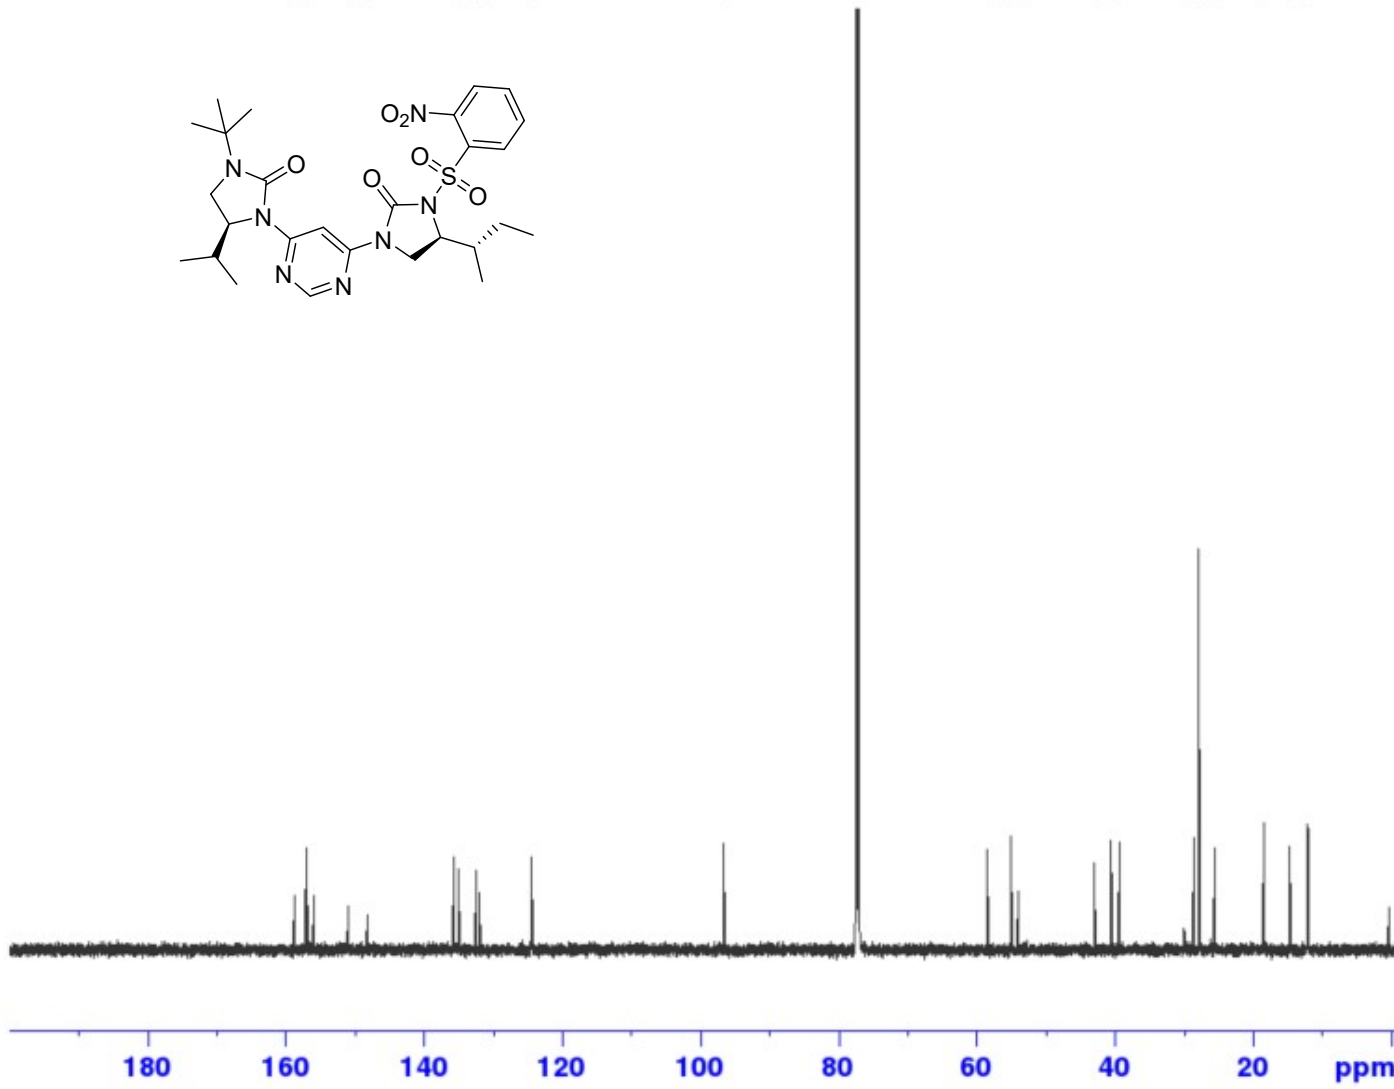

S21  
<sup>13</sup>C NMR  
 101 MHz  
 CDCl<sub>3</sub>

Current Data Parameters  
 NAME TW-A-183-A TRIT 600  
 EXPNO 20  
 PROCNO 1

F2 - Acquisition Parameters  
 Date\_ 20190910  
 Time 17.05  
 INSTRUM spect  
 PROBHD 5 mm PABBO BB/  
 PULPROG zg30  
 TD 65536  
 SOLVENT CDC13  
 NS 16  
 DS 2  
 SWH 12019.230 Hz  
 FIDRES 0.183399 Hz  
 AQ 2.7262976 sec  
 RG 134.29  
 DW 41.600 usec  
 DE 6.50 usec  
 TE 300.0 K  
 D1 1.00000000 sec  
 TDO 1

----- CHANNEL f1 -----  
 SFO1 600.1337060 MHz  
 NUC1 1H  
 P1 10.00 usec  
 PLW1 26.60000038 W

F2 - Processing parameters  
 SI 65536  
 SF 600.1300135 MHz  
 WDW EM  
 SSB 0  
 LB 0.30 Hz  
 GB 0  
 PC 1.00

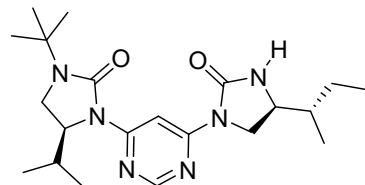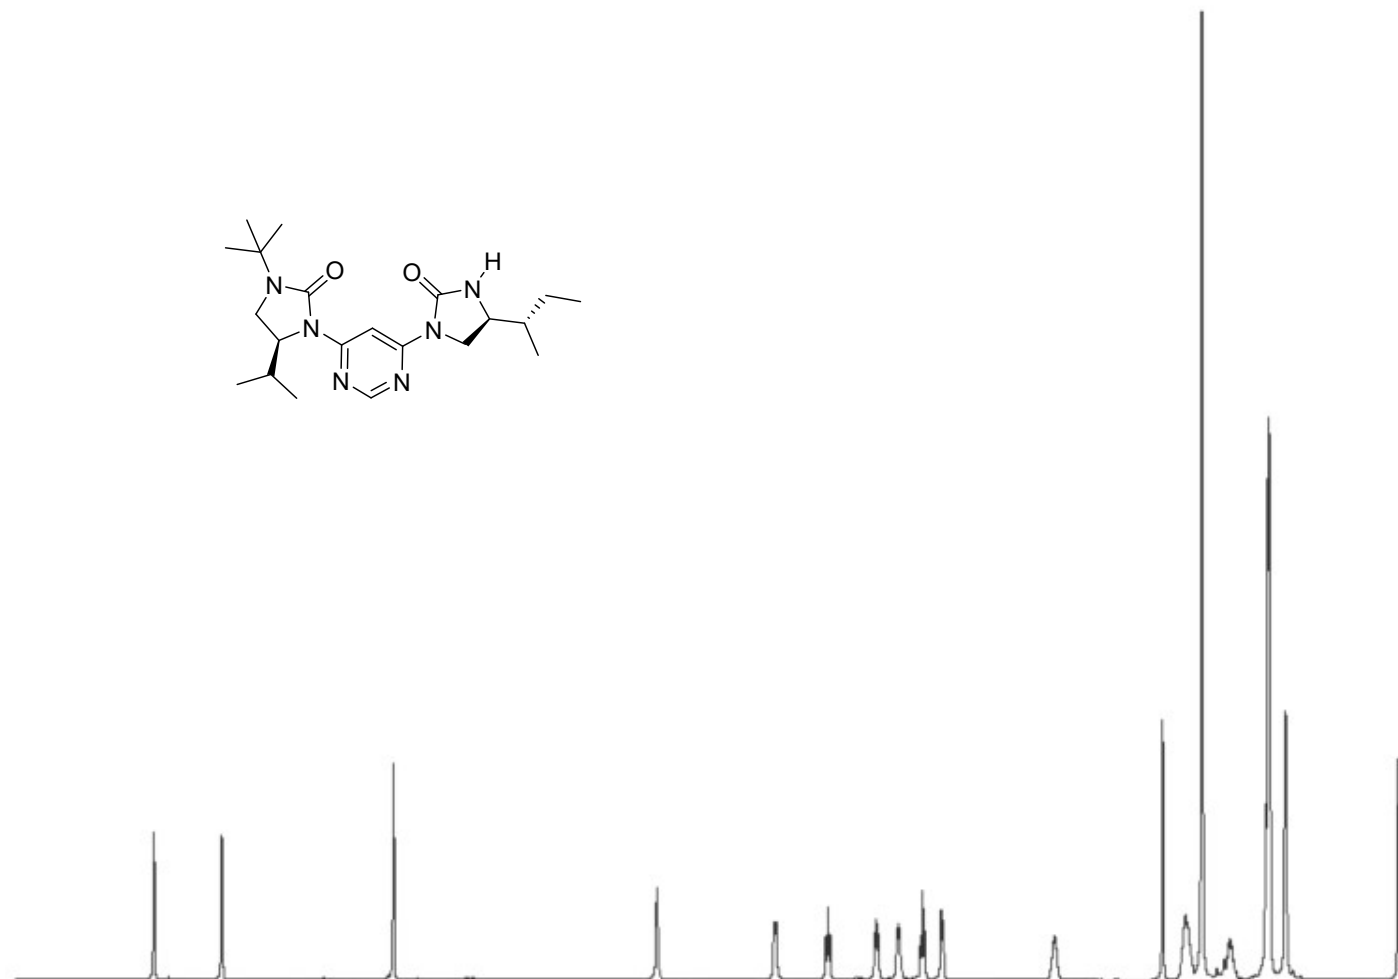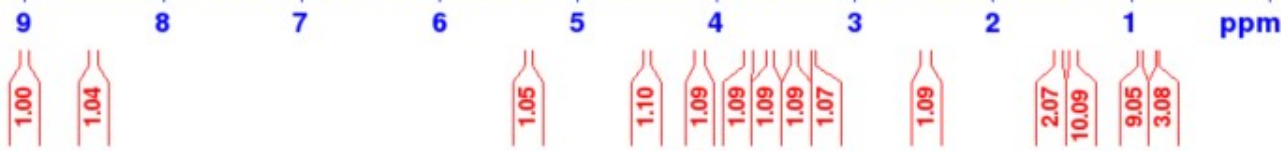

S22  
<sup>1</sup>H NMR  
 600 MHz  
 CDCl<sub>3</sub>

S22  
<sup>13</sup>C NMR  
 151 MHz  
 CDCl<sub>3</sub>

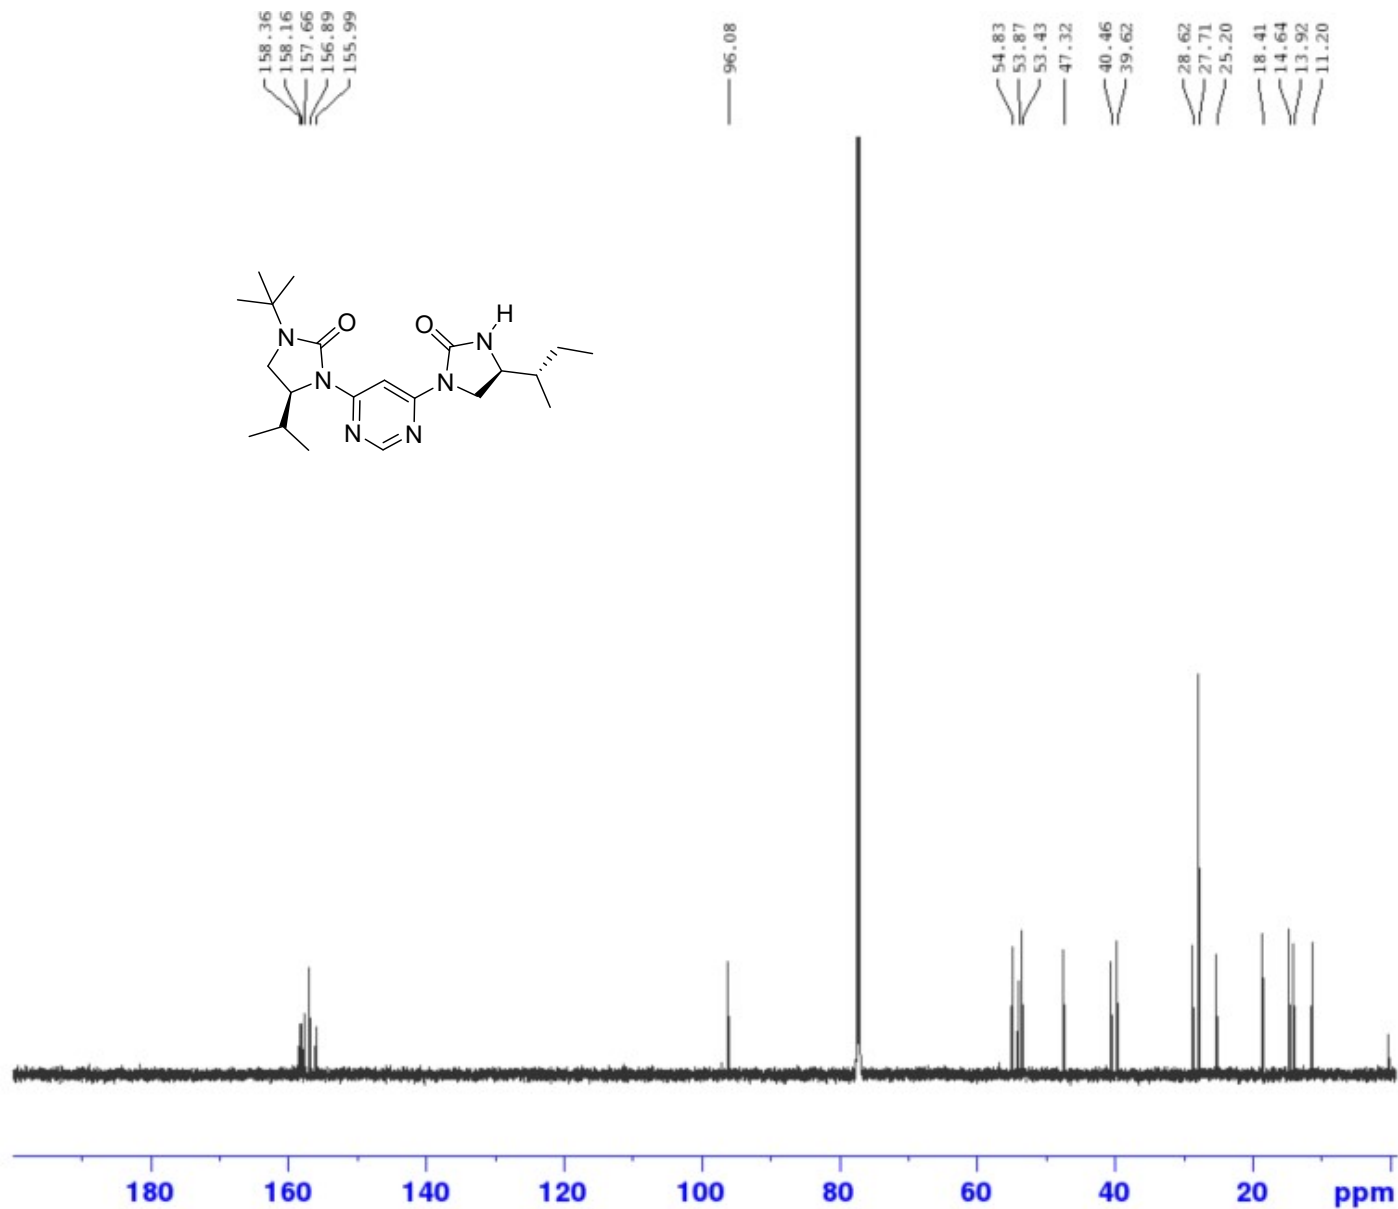

Current Data Parameters  
 NAME TW-A-183-A TRIT 600  
 EXPNO 21  
 PROCNO 1

F2 - Acquisition Parameters  
 Date\_ 20190910  
 Time 17.56  
 INSTRUM spect  
 PROBHD 5 mm PABBO BB/  
 PULPROG zgpg30  
 TD 65536  
 SOLVENT CDCl3  
 NS 1024  
 DS 4  
 SWH 36057.691 Hz  
 FIDRES 0.550197 Hz  
 AQ 0.9087659 sec  
 RG 186.92  
 DW 13.867 usec  
 DE 6.50 usec  
 TE 300.0 K  
 D1 2.00000000 sec  
 D11 0.03000000 sec  
 TDO 1

===== CHANNEL f1 =====  
 SFO1 150.9178981 MHz  
 NUC1 13C  
 P1 11.80 usec  
 PLW1 85.00000000 W

===== CHANNEL f2 =====  
 SFO2 600.1324005 MHz  
 NUC2 1H  
 CPDPRG[2] waltz16  
 PCPD2 80.00 usec  
 PLW2 27.00000000 W  
 PLW12 0.43891999 W  
 PLW13 0.28090999 W

F2 - Processing parameters  
 SI 32768  
 SF 150.9027879 MHz  
 WDW EM  
 SSB 0  
 LB 1.00 Hz  
 GB 0  
 PC 1.40

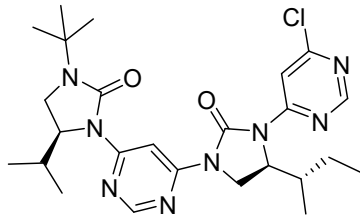

Current Data Parameters  
 NAME TW-A-184 TRIT 600  
 EXPNO 10  
 PROCNO 1

F2 - Acquisition Parameters  
 Date\_ 20190904  
 Time 10.43  
 INSTRUM spect  
 PROBHD 5 mm PABBO BB/  
 PULPROG zg30  
 TD 65536  
 SOLVENT CDCl3  
 NS 16  
 DS 2  
 SWH 12019.230 Hz  
 FIDRES 0.183399 Hz  
 AQ 2.7262976 sec  
 RG 119.2  
 DW 41.600 usec  
 DE 6.50 usec  
 TE 300.0 K  
 D1 1.00000000 sec  
 TDO 1

----- CHANNEL f1 -----  
 SFO1 600.1337060 MHz  
 NUC1 1H  
 P1 10.00 usec  
 PLW1 26.60000038 W

F2 - Processing parameters  
 SI 65536  
 SF 600.1300127 MHz  
 WDW EM  
 SSB 0  
 LB 0.30 Hz  
 GB 0  
 PC 1.00

**1a**  
<sup>1</sup>H NMR  
 600 MHz  
 CDCl<sub>3</sub>

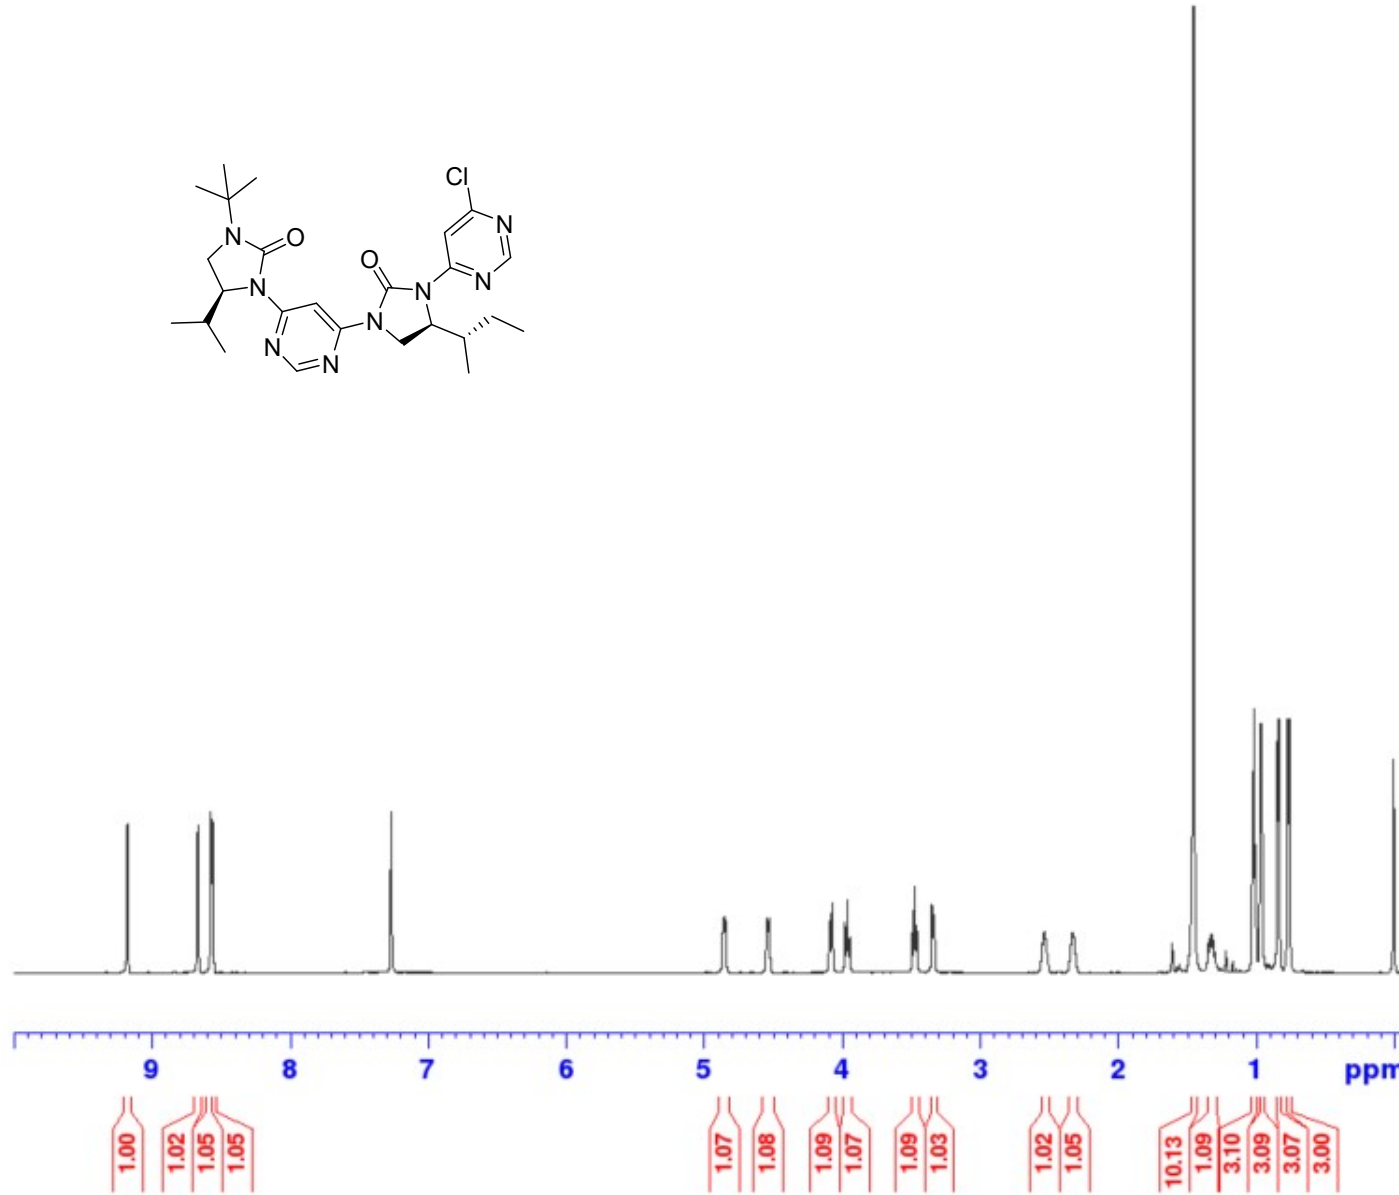

**1a**  
<sup>13</sup>C NMR  
 151 MHz  
 CDCl<sub>3</sub>

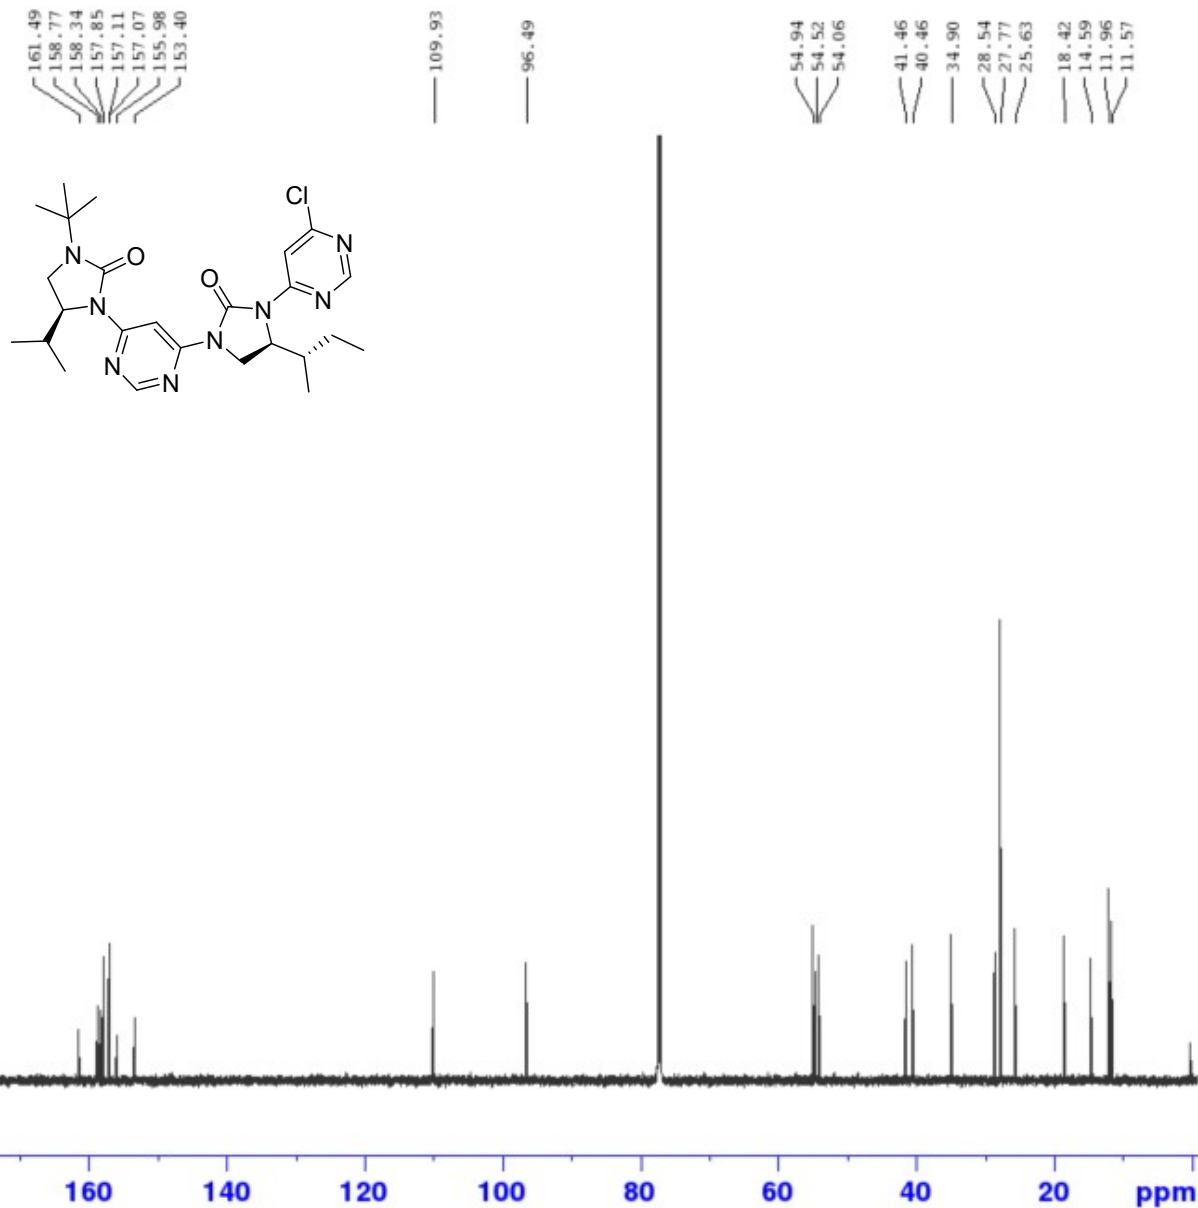

Current Data Parameters  
 NAME TW-A-184 TRIT 600  
 EXPNO 11  
 PROCNO 1

F2 - Acquisition Parameters  
 Date\_ 20190906  
 Time 18.27  
 INSTRUM spect  
 PROBHD 5 mm PABBO BB/  
 PULPROG zgpg30  
 TD 65536  
 SOLVENT CDCl3  
 NS 1024  
 DS 4  
 SWH 36057.691 Hz  
 FIDRES 0.550197 Hz  
 AQ 0.9087659 sec  
 RG 186.92  
 DW 13.867 usec  
 DE 6.50 usec  
 TE 300.0 K  
 D1 2.00000000 sec  
 D11 0.03000000 sec  
 TDO 1

===== CHANNEL f1 =====  
 SFO1 150.9178981 MHz  
 NUC1 13C  
 P1 11.80 usec  
 PLW1 85.00000000 W

===== CHANNEL f2 =====  
 SFO2 600.1324005 MHz  
 NUC2 1H  
 CPDPRG[2] waltz16  
 PCPD2 80.00 usec  
 PLW2 27.00000000 W  
 PLW12 0.43891999 W  
 PLW13 0.28090999 W

F2 - Processing parameters  
 SI 32768  
 SF 150.9027876 MHz  
 WDW EM  
 SSB 0  
 LB 1.00 Hz  
 GB 0  
 PC 1.40

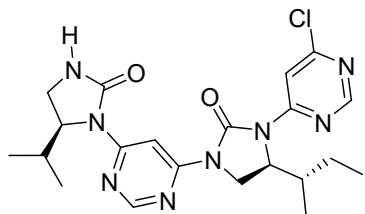

2a

<sup>1</sup>H NMR

600 MHz

CDCl<sub>3</sub>

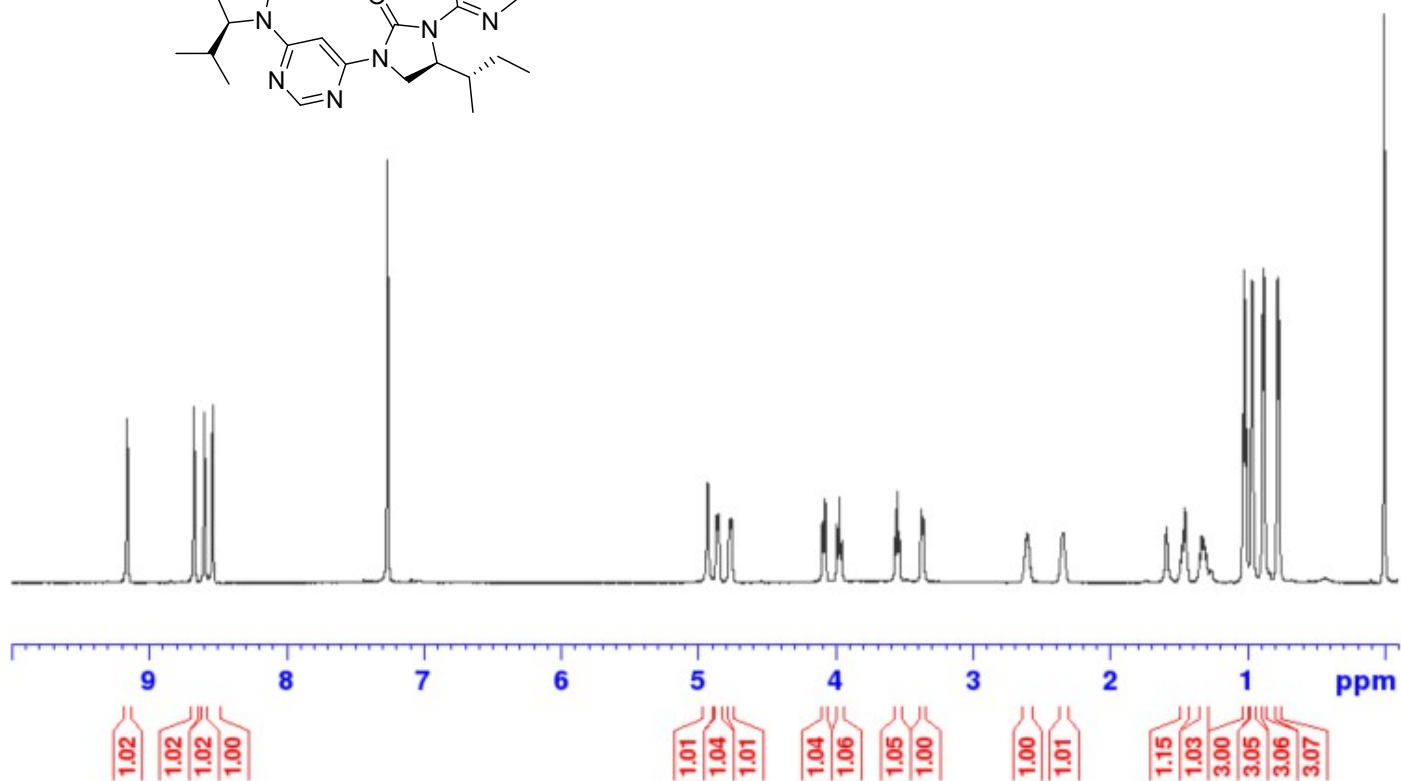

Current Data Parameters  
 NAME TW-A-185-A TRIT 600  
 EXPNO 10  
 PROCNO 1

F2 - Acquisition Parameters  
 Date\_ 20190904  
 Time 10.55  
 INSTRUM spect  
 PROBHD 5 mm PABBO BB/  
 PULPROG zg30  
 TD 65536  
 SOLVENT CDCl3  
 NS 16  
 DS 2  
 SWH 12019.230 Hz  
 FIDRES 0.183399 Hz  
 AQ 2.7262976 sec  
 RG 105.21  
 DW 41.600 usec  
 DE 6.50 usec  
 TE 300.0 K  
 D1 1.00000000 sec  
 TDO 1

----- CHANNEL f1 -----  
 SF01 600.1337060 MHz  
 NUC1 1H  
 P1 10.00 usec  
 PLW1 26.60000038 W

F2 - Processing parameters  
 SI 65536  
 SF 600.1300142 MHz  
 WDW EM  
 SSB 0  
 LB 0.30 Hz  
 GB 0  
 PC 1.00

2a  
<sup>13</sup>C NMR  
 151 MHz  
 CDCl<sub>3</sub>

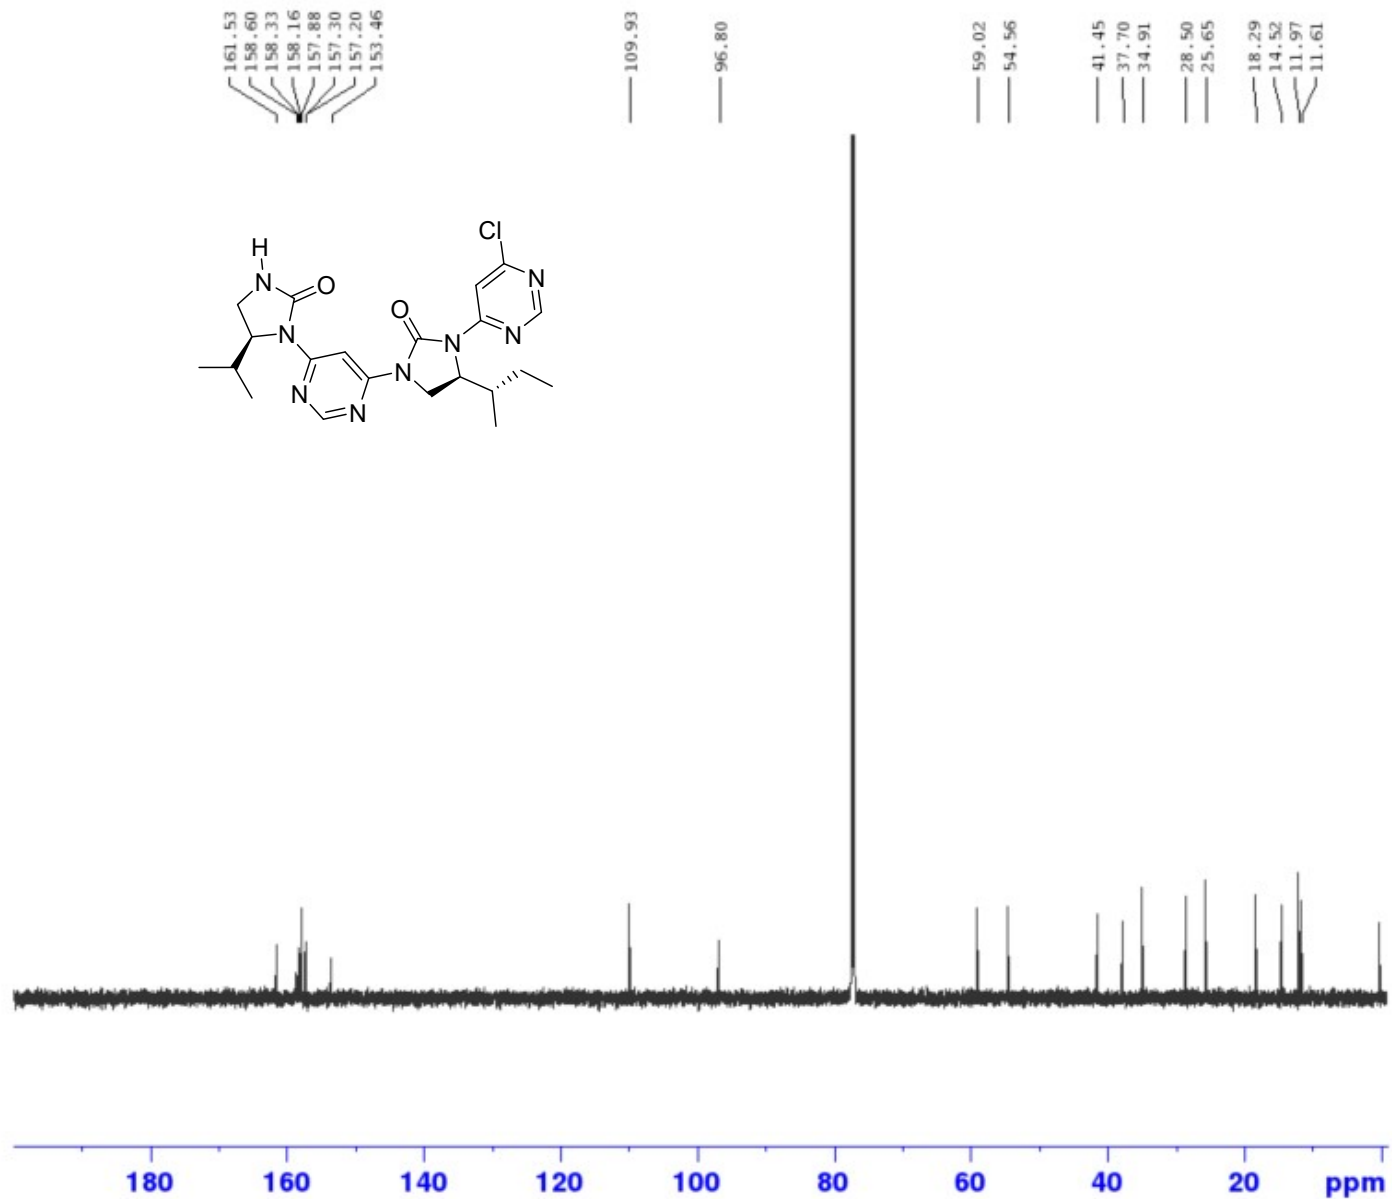

Current Data Parameters  
 NAME TW-A-185-A TRIT 600  
 EXPNO 11  
 PROCNO 1

F2 - Acquisition Parameters  
 Date\_ 20190906  
 Time 23.03  
 INSTRUM spect  
 PROBHD 5 mm PABBO BB/  
 PULPROG zgpg30  
 TD 65536  
 SOLVENT CDCl3  
 NS 1024  
 DS 4  
 SWH 36057.691 Hz  
 FIDRES 0.550197 Hz  
 AQ 0.9087659 sec  
 RG 186.92  
 DW 13.867 usec  
 DE 6.50 usec  
 TE 300.0 K  
 D1 2.00000000 sec  
 D11 0.03000000 sec  
 TDO 1

===== CHANNEL f1 =====  
 SFO1 150.9178981 MHz  
 NUC1 13C  
 P1 11.80 usec  
 PLW1 85.00000000 W

===== CHANNEL f2 =====  
 SFO2 600.1324005 MHz  
 NUC2 1H  
 CPDPRG[2] waltz16  
 PCPD2 80.00 usec  
 PLW2 27.00000000 W  
 PLW12 0.43891999 W  
 PLW13 0.28090999 W

F2 - Processing parameters  
 SI 32768  
 SF 150.9027870 MHz  
 WDW EM  
 SSB 0  
 LB 1.00 Hz  
 GB 0  
 PC 1.40

S23\*  
1H NMR  
600 MHz  
CDCl3

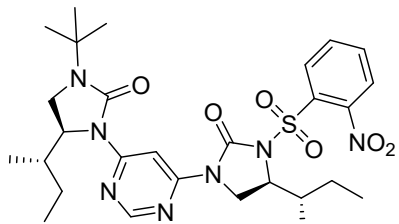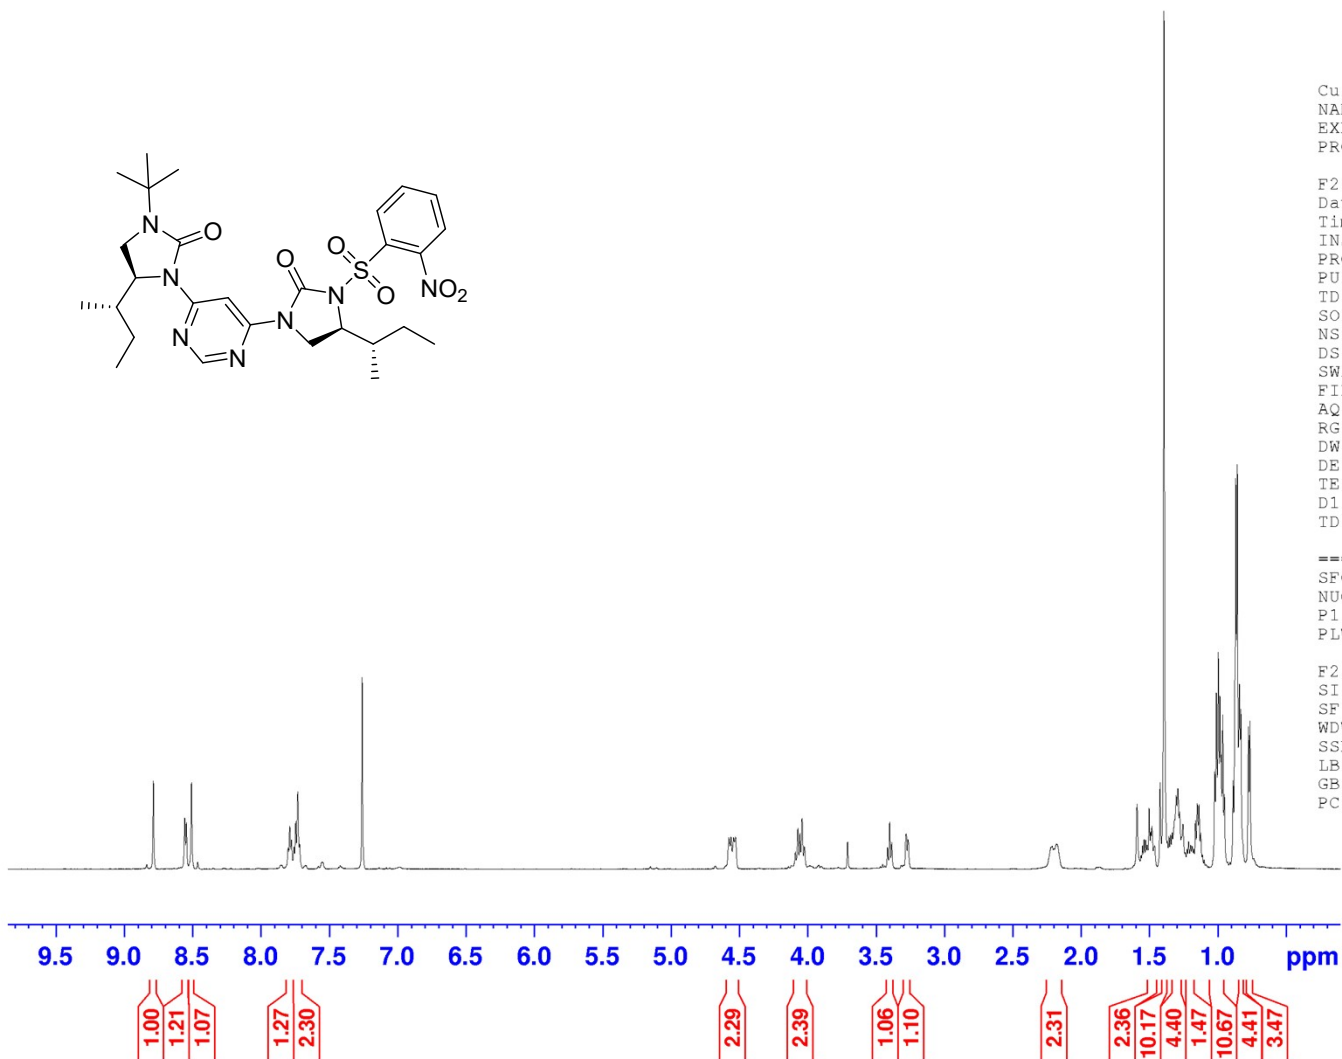

Current Data Parameters  
NAME TW-B-220-A TRIT 600  
EXPNO 10  
PROCNO 1

F2 - Acquisition Parameters  
Date\_ 20190910  
Time 2.50  
INSTRUM spect  
PROBHD 5 mm PABBO BB/  
PULPROG zg30  
TD 65536  
SOLVENT CDCl3  
NS 16  
DS 2  
SWH 12019.230 Hz  
FIDRES 0.183399 Hz  
AQ 2.7262976 sec  
RG 119.2  
DW 41.600 usec  
DE 6.50 usec  
TE 300.0 K  
D1 1.00000000 sec  
TD0 1

----- CHANNEL f1 -----  
SF01 600.1337060 MHz  
NUC1 1H  
P1 10.00 usec  
PLW1 26.60000038 W

F2 - Processing parameters  
SI 65536  
SF 600.1300151 MHz  
WDW EM  
SSB 0  
LB 0.30 Hz  
GB 0  
PC 1.00

\* This compound was partially contaminated with hydrocarbon grease.



S23\*  
<sup>13</sup>C NMR  
 151 MHz  
 CDCl<sub>3</sub>

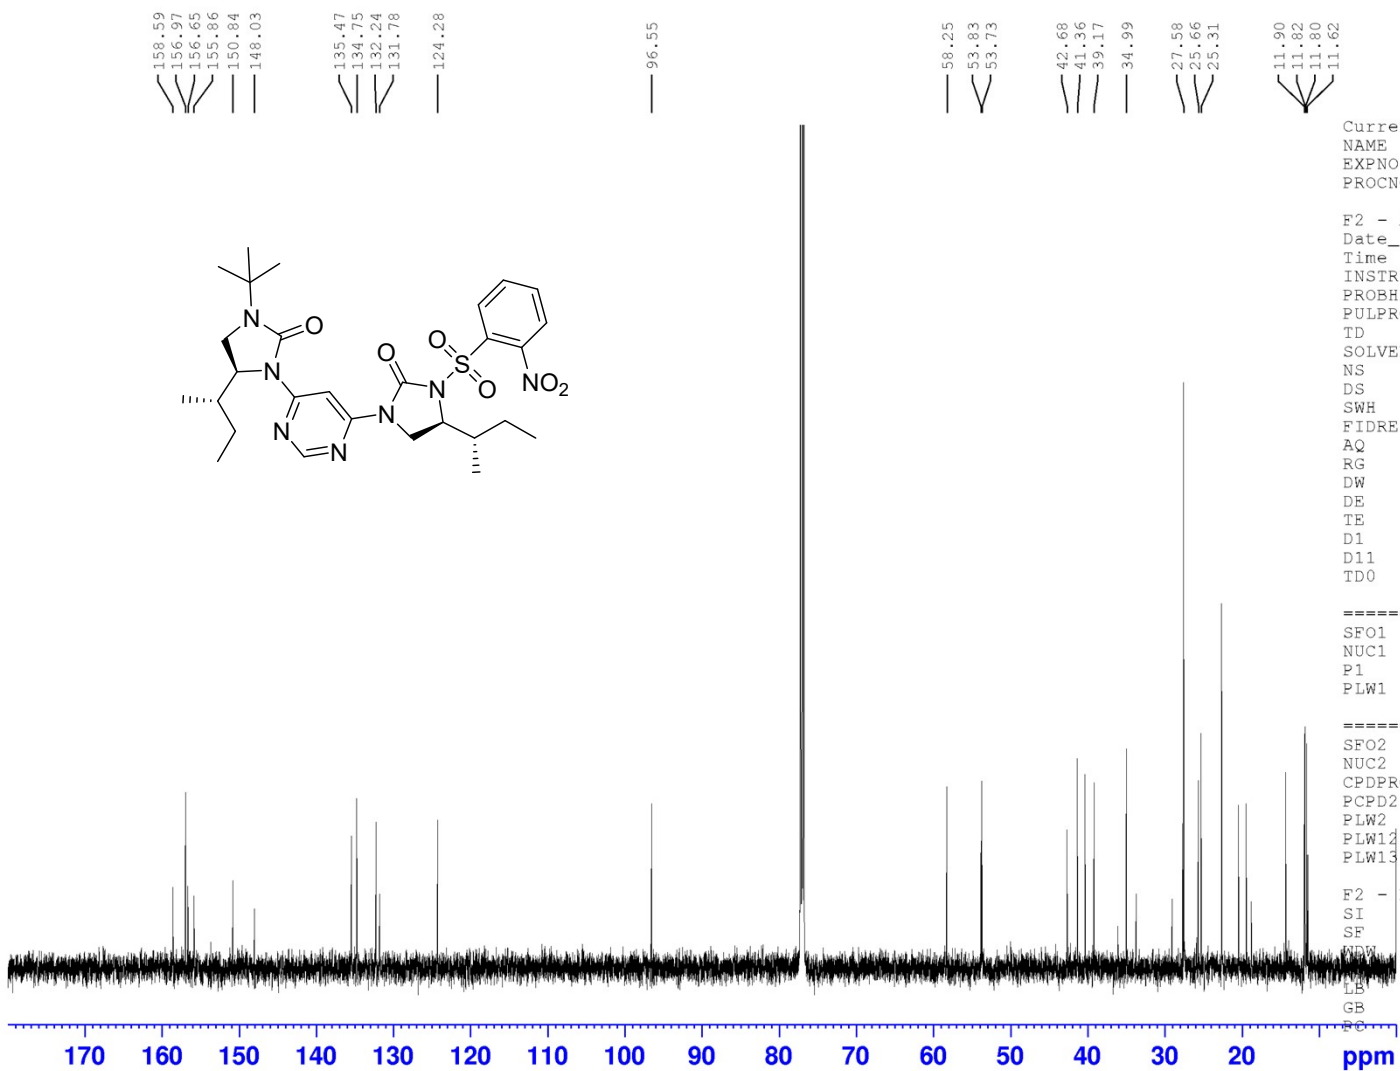

Current Data Parameters  
 NAME TW-B-220-A TRIT 600  
 EXPNO 11  
 PROCNO 1

F2 - Acquisition Parameters  
 Date\_ 20190910  
 Time 3.42  
 INSTRUM spect  
 PROBHD 5 mm PABBO BB/  
 PULPROG zgpg30  
 TD 65536  
 SOLVENT CDCl3  
 NS 1024  
 DS 4  
 SWH 36057.691 Hz  
 FIDRES 0.550197 Hz  
 AQ 0.9087659 sec  
 RG 186.92  
 DW 13.867 usec  
 DE 6.50 usec  
 TE 300.0 K  
 D1 2.0000000 sec  
 D11 0.03000000 sec  
 TD0 1

==== CHANNEL f1 =====  
 SFO1 150.9178981 MHz  
 NUC1 13C  
 P1 11.80 usec  
 PLW1 85.00000000 W

==== CHANNEL f2 =====  
 SFO2 600.1324005 MHz  
 NUC2 1H  
 CPDPRG[2] waltz16  
 PCPD2 80.00 usec  
 PLW2 27.00000000 W  
 PLW12 0.43891999 W  
 PLW13 0.28090999 W

F2 - Processing parameters  
 SI 32768  
 SF 150.9028083 MHz  
 NDFW EM  
 LB 1.00 Hz  
 GB 0  
 PC 1.40

\* This compound was partially contaminated with hydrocarbon grease.

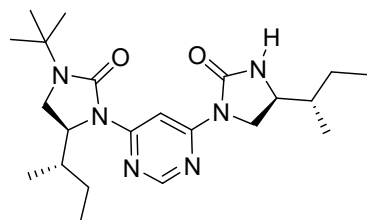

Current Data Parameters  
 NAME TW-B-225 600  
 EXPNO 90  
 PROCNO 1

F2 - Acquisition Parameters  
 Date\_ 20190831  
 Time 11.25  
 INSTRUM spect  
 PROBHD 5 mm PABBO BB/  
 PULPROG zg30  
 TD 65536  
 SOLVENT CDCl3  
 NS 16  
 DS 2  
 SWH 12019.230 Hz  
 FIDRES 0.183399 Hz  
 AQ 2.7262976 sec  
 RG 105.21  
 DW 41.600 usec  
 DE 6.50 usec  
 TE 300.0 K  
 D1 1.00000000 sec  
 TDO 1

----- CHANNEL f1 -----  
 SFO1 600.1337060 MHz  
 NUC1 1H  
 P1 10.00 usec  
 PLW1 26.60000038 W

F2 - Processing parameters  
 SI 65536  
 SF 600.1300149 MHz  
 WDW EM  
 SSB 0  
 LB 0.30 Hz  
 GB 0  
 PC 1.00

S24  
<sup>1</sup>H NMR  
 600 MHz  
 CDCl<sub>3</sub>

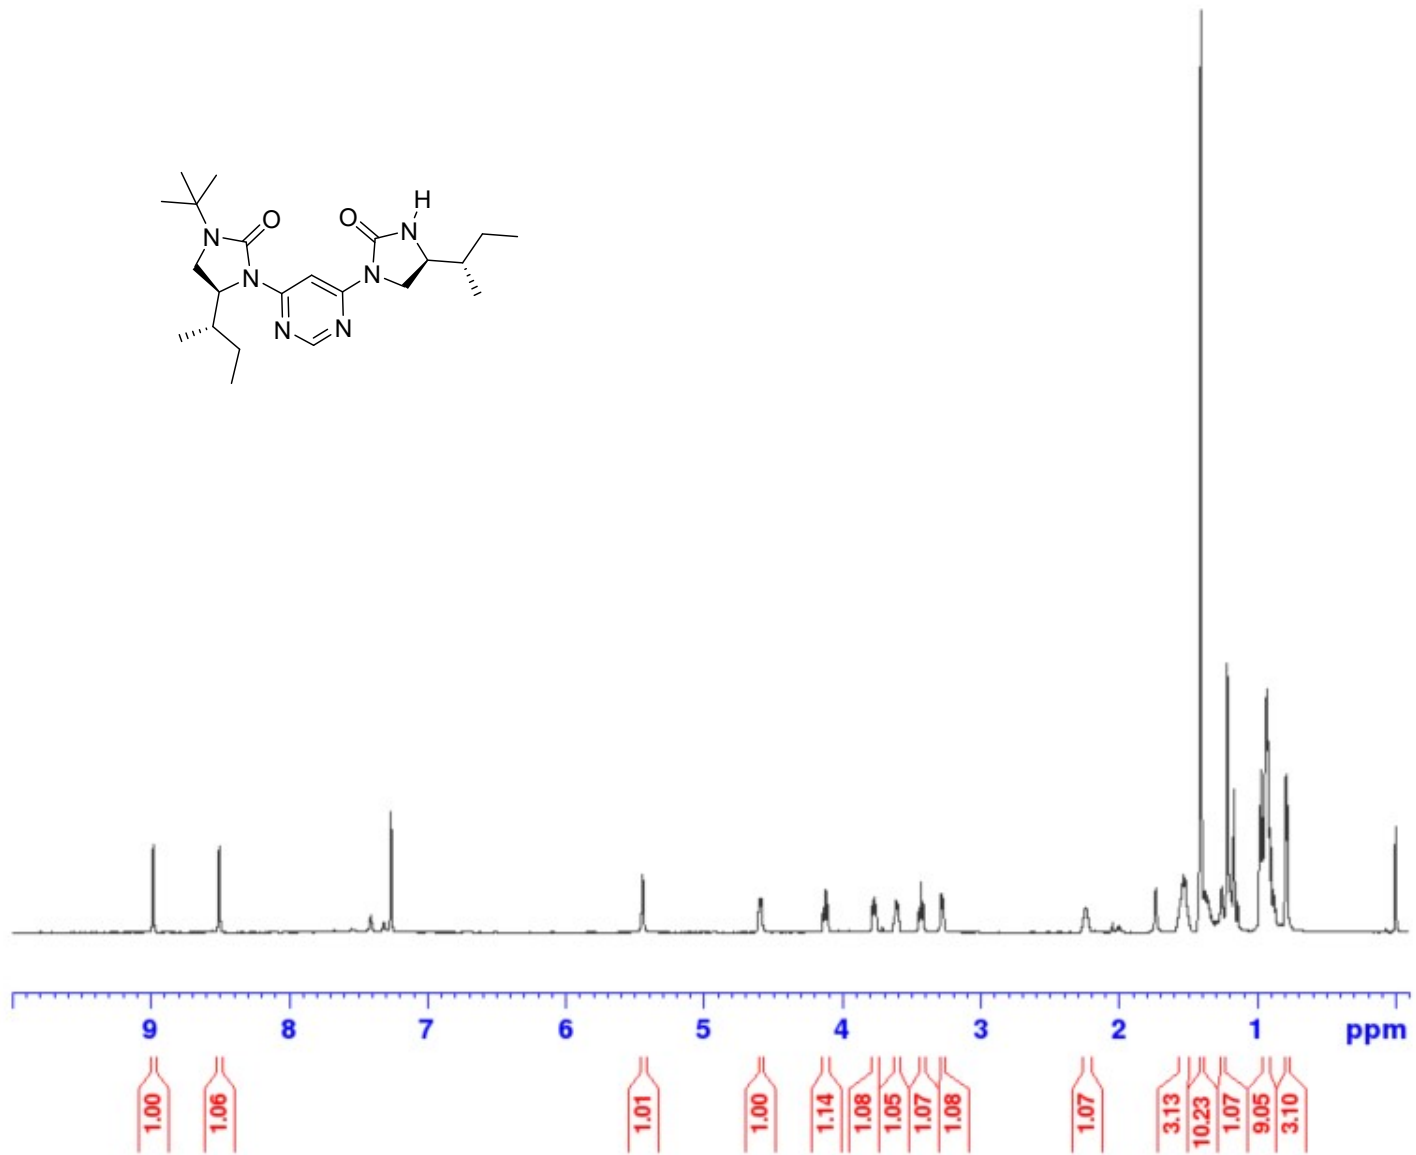

S24  
<sup>13</sup>C NMR  
 151 MHz  
 CDCl<sub>3</sub>

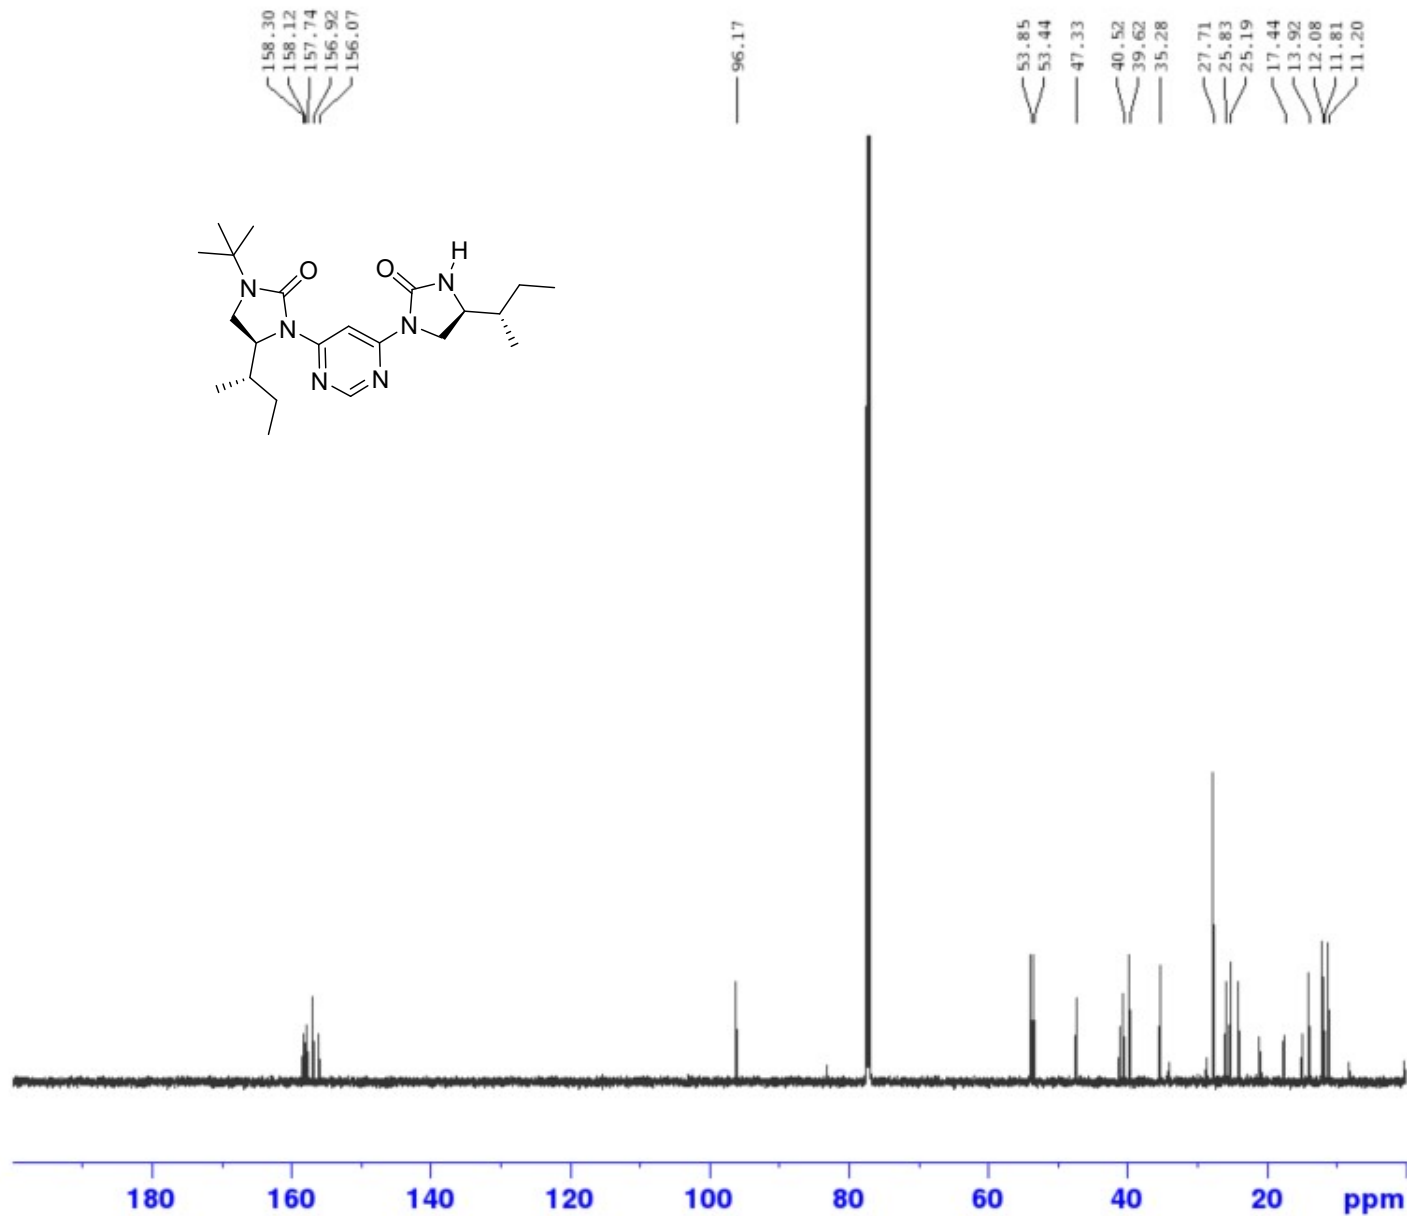

Current Data Parameters  
 NAME TW-B-225 600  
 EXPNO 92  
 PROCNO 1

F2 - Acquisition Parameters  
 Date\_ 20190831  
 Time 12.16  
 INSTRUM spect  
 PROBHD 5 mm PABBO BB/  
 PULPROG zgpg30  
 TD 65536  
 SOLVENT CDCl3  
 NS 1024  
 DS 4  
 SWH 36057.691 Hz  
 FIDRES 0.550197 Hz  
 AQ 0.9087659 sec  
 RG 186.92  
 DW 13.867 usec  
 DE 6.50 usec  
 TE 300.0 K  
 D1 2.0000000 sec  
 D11 0.03000000 sec  
 TDO 1

===== CHANNEL f1 =====  
 SFO1 150.9178981 MHz  
 NUC1 13C  
 P1 11.80 usec  
 PLW1 85.00000000 W

===== CHANNEL f2 =====  
 SFO2 600.1324005 MHz  
 NUC2 1H  
 CPDPRG[2] waltz16  
 PCPD2 80.00 usec  
 PLW2 27.00000000 W  
 PLW12 0.43891999 W  
 PLW13 0.28090999 W

F2 - Processing parameters  
 SI 32768  
 SF 150.9027881 MHz  
 WDW EM  
 SSB 0  
 LB 1.00 Hz  
 GB 0  
 PC 1.40

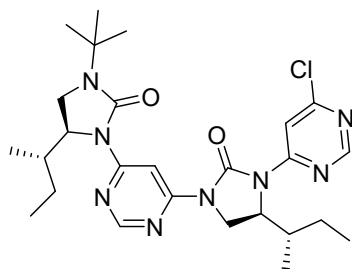

**1b**  
<sup>1</sup>H NMR  
 600 MHz  
 CDCl<sub>3</sub>

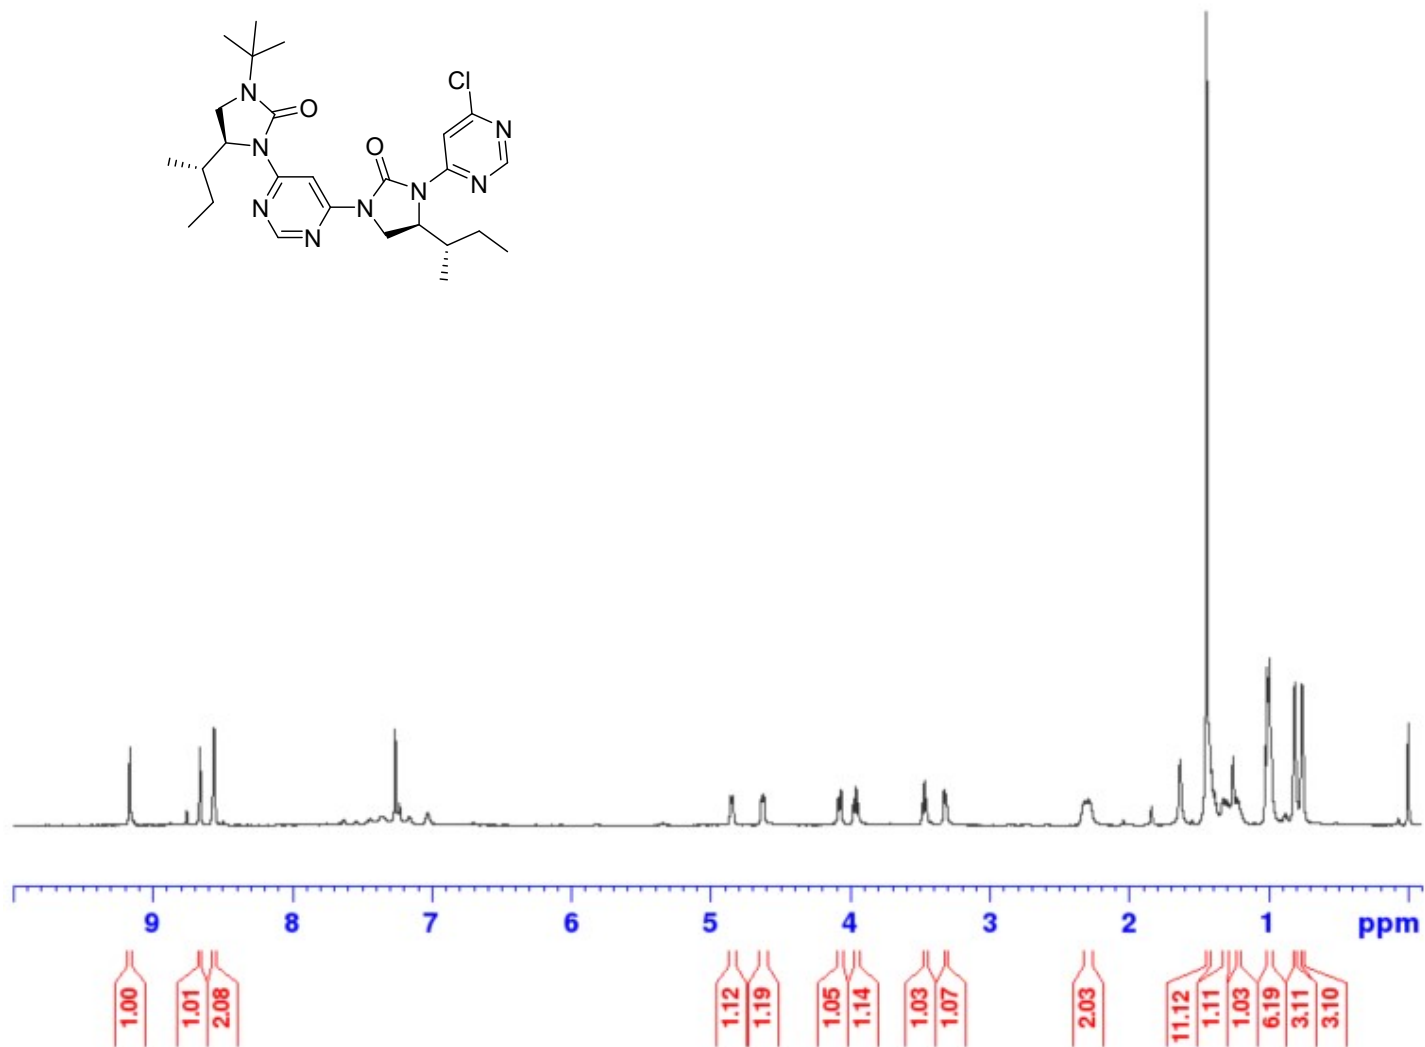

```

Current Data Parameters
NAME      TW-B-244-A 600
EXPNO    10
PROCNO    1

F2 - Acquisition Parameters
Date_    20190906
Time     0.04
INSTRUM  spect
PROBHD   5 mm PABBO BB/
PULPROG  zg30
TD       65536
SOLVENT  CDCl3
NS       16
DS       2
SWH      12019.230 Hz
FIDRES   0.183399 Hz
AQ       2.7262976 sec
RG       105.21
DW       41.600 usec
DE       6.50 usec
TE       300.0 K
D1       1.00000000 sec
TDO      1

----- CHANNEL f1 -----
SFO1    600.1337060 MHz
NUC1     1H
P1       10.00 usec
PLW1    26.60000038 W

F2 - Processing parameters
SI       65536
SF       600.1300152 MHz
WDW      EM
SSB      0
LB       0.30 Hz
GB       0
PC       1.00
  
```

**1b**  
<sup>13</sup>C NMR  
 151 MHz  
 CDCl<sub>3</sub>

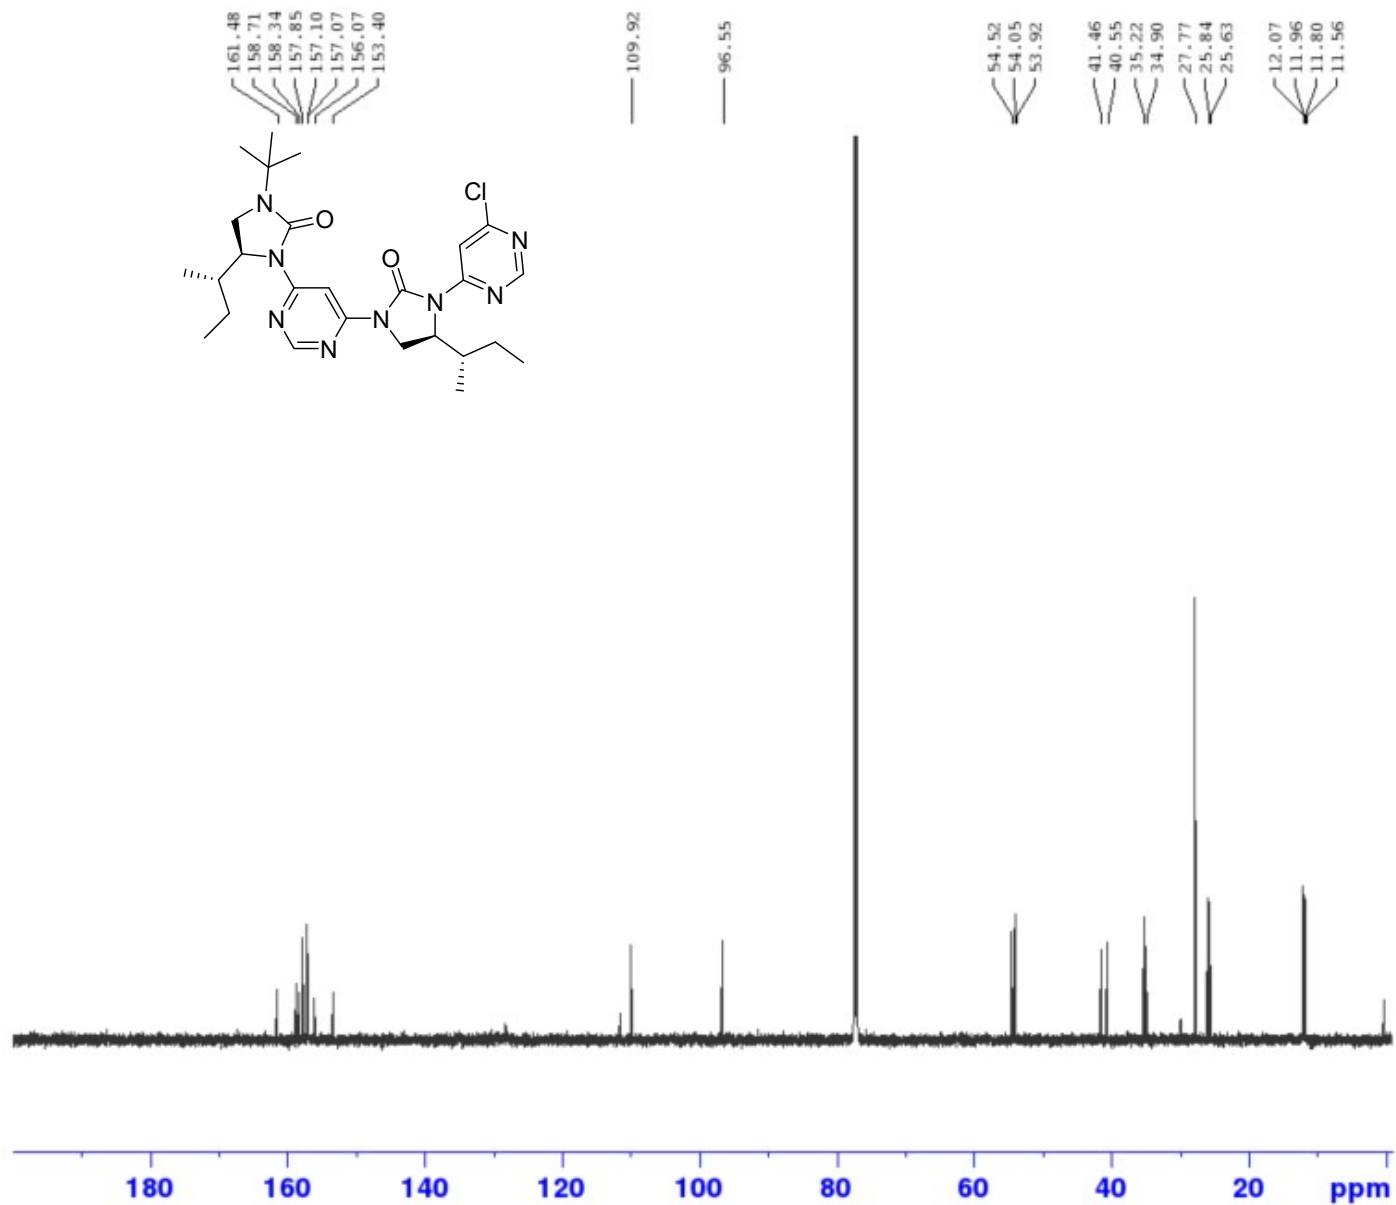

Current Data Parameters  
 NAME TW-B-244-A 600  
 EXPNO 12  
 PROCNO 1

F2 - Acquisition Parameters  
 Date\_ 20190906  
 Time 0.55  
 INSTRUM spect  
 PROBHD 5 mm PABBO BB/  
 PULPROG zgpg30  
 TD 65536  
 SOLVENT CDC13  
 NS 1024  
 DS 4  
 SWH 36057.691 Hz  
 FIDRES 0.550197 Hz  
 AQ 0.9087659 sec  
 RG 186.92  
 DW 13.867 usec  
 DE 6.50 usec  
 TE 300.0 K  
 D1 2.0000000 sec  
 D11 0.0300000 sec  
 TDO 1

===== CHANNEL f1 =====  
 SFO1 150.9178981 MHz  
 NUC1 13C  
 P1 11.80 usec  
 PLW1 85.0000000 W

===== CHANNEL f2 =====  
 SFO2 600.1324005 MHz  
 NUC2 1H  
 CPDPRG[2] waltz16  
 PCPD2 80.00 usec  
 PLW2 27.0000000 W  
 PLW12 0.43891999 W  
 PLW13 0.28090999 W

F2 - Processing parameters  
 SI 32768  
 SF 150.9027883 MHz  
 WDW EM  
 SSB 0  
 LB 1.00 Hz  
 GB 0  
 PC 1.40

Current Data Parameters  
 NAME TW-B-248 600  
 EXPNO 100  
 PROCNO 1

F2 - Acquisition Parameters  
 Date\_ 20190831  
 Time 13.36  
 INSTRUM spect  
 PROBHD 5 mm PABBO BB/  
 PULPROG zg30  
 TD 65536  
 SOLVENT CDC13  
 NS 16  
 DS 2  
 SWH 12019.230 Hz  
 FIDRES 0.183399 Hz  
 AQ 2.7262976 sec  
 RG 168.12  
 DW 41.600 usec  
 DE 6.50 usec  
 TE 300.0 K  
 D1 1.00000000 sec  
 TDO 1

----- CHANNEL f1 -----  
 SFO1 600.1337060 MHz  
 NUC1 1H  
 P1 10.00 usec  
 PLW1 26.60000038 W

F2 - Processing parameters  
 SI 65536  
 SF 600.1300153 MHz  
 WDW EM  
 SSB 0  
 LB 0.30 Hz  
 GB 0  
 PC 1.00

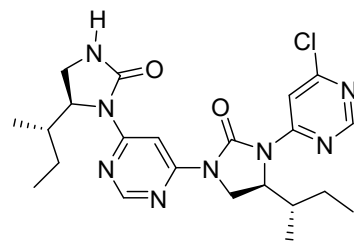

**2b**  
<sup>1</sup>H NMR  
 600 MHz  
 CDCl<sub>3</sub>

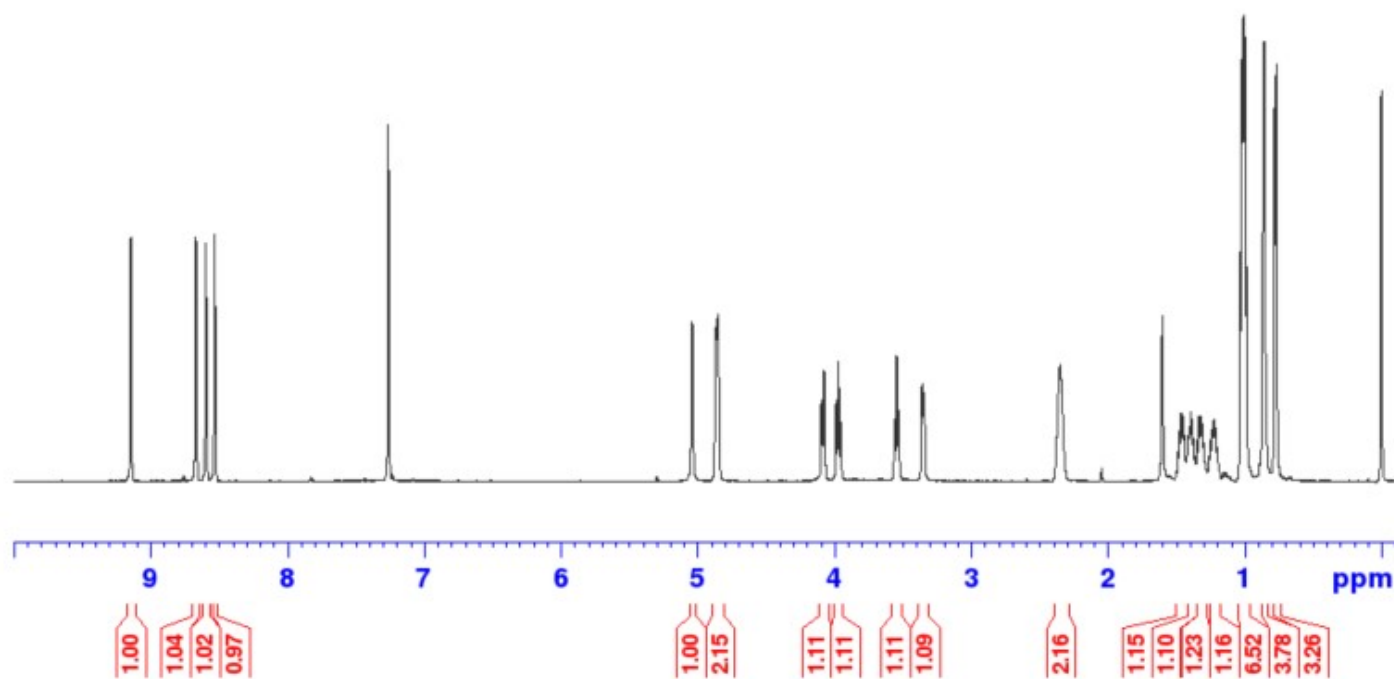

**2b**  
<sup>13</sup>C NMR  
 151 MHz  
 CDCl<sub>3</sub>

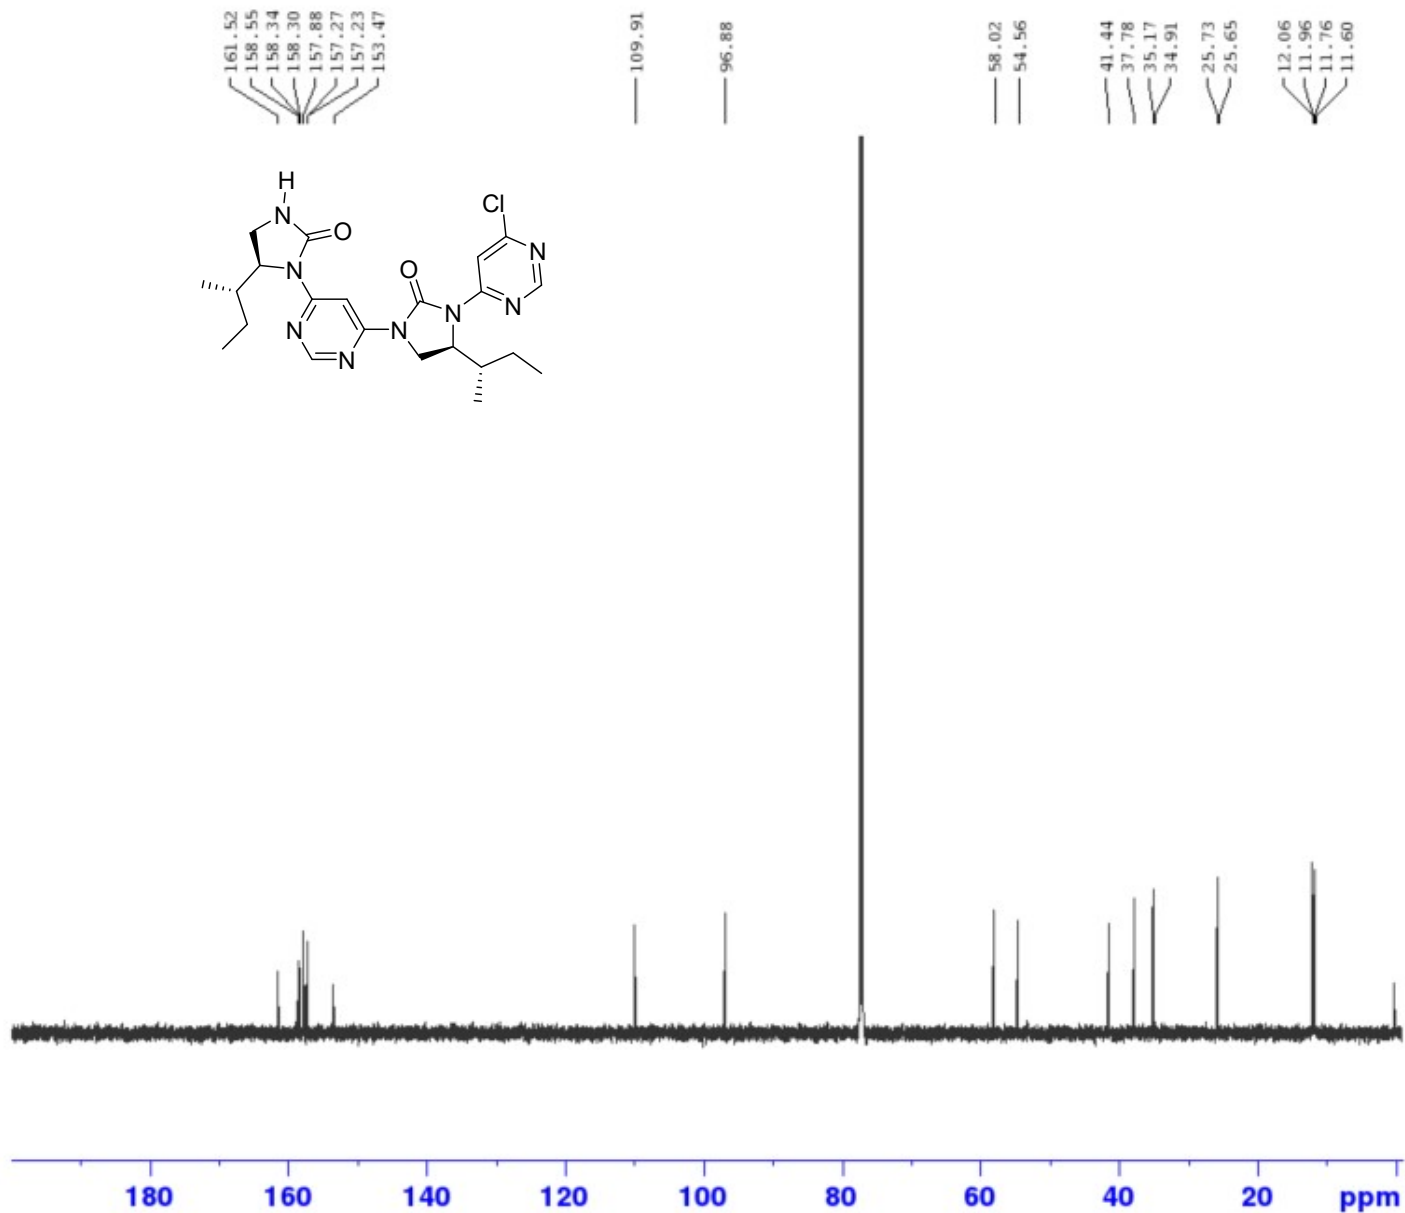

Current Data Parameters  
 NAME TW-B-248 600  
 EXPNO 102  
 PROCNO 1

F2 - Acquisition Parameters  
 Date\_ 20190831  
 Time 14.27  
 INSTRUM spect  
 PROBHD 5 mm PABBO BB/  
 PULPROG zgpg30  
 TD 65536  
 SOLVENT CDCl3  
 NS 1024  
 DS 4  
 SWH 36057.691 Hz  
 FIDRES 0.550197 Hz  
 AQ 0.9087659 sec  
 RG 186.92  
 DW 13.867 usec  
 DE 6.50 usec  
 TE 300.0 K  
 D1 2.0000000 sec  
 D11 0.03000000 sec  
 TDO 1

===== CHANNEL f1 =====  
 SFO1 150.9178981 MHz  
 NUC1 13C  
 P1 11.80 usec  
 PLW1 85.00000000 W

===== CHANNEL f2 =====  
 SFO2 600.1324005 MHz  
 NUC2 1H  
 CPDPRG[2] waltz16  
 PCPD2 80.00 usec  
 PLW2 27.00000000 W  
 PLW12 0.43891999 W  
 PLW13 0.28090999 W

F2 - Processing parameters  
 SI 32768  
 SF 150.9027873 MHz  
 WDW EM  
 SSB 0  
 LB 1.00 Hz  
 GB 0  
 PC 1.40

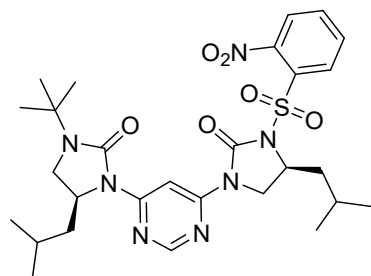

S25  
<sup>1</sup>H NMR  
 600 MHz  
 CDCl<sub>3</sub>

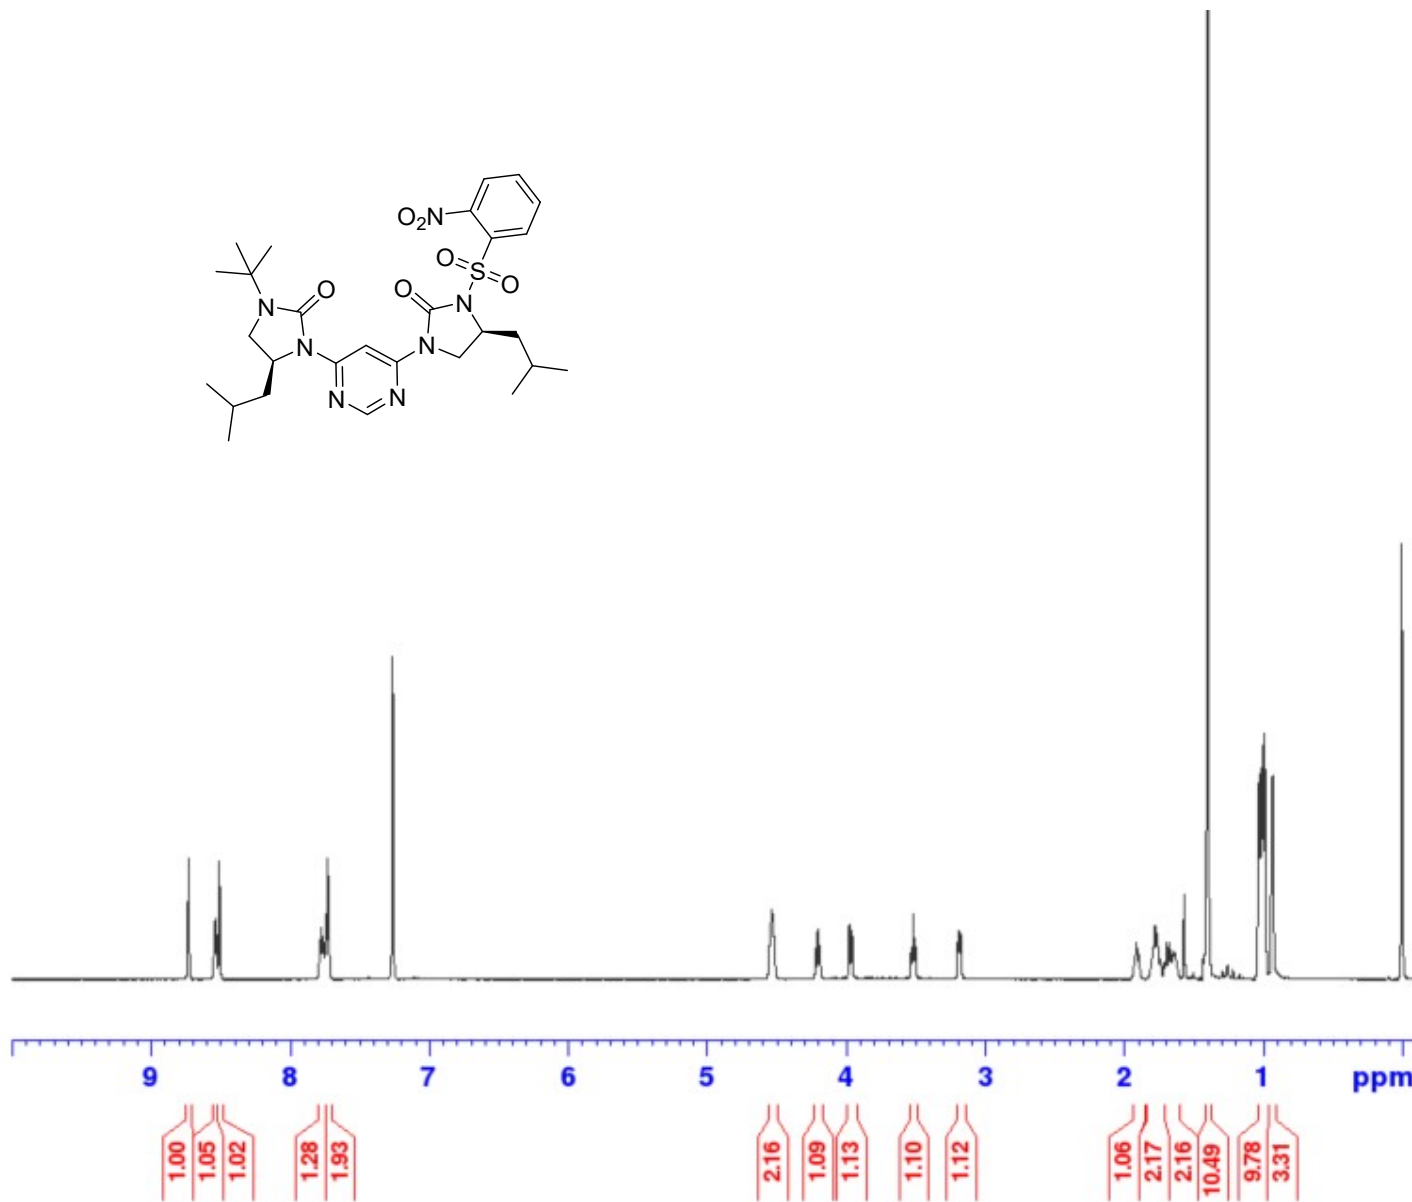

Current Data Parameters  
 NAME TW-A-144-A TRIT 600  
 EXPNO 10  
 PROCNO 1

F2 - Acquisition Parameters  
 Date\_ 20190903  
 Time 16.12  
 INSTRUM spect  
 PROBHD 5 mm PABBO BB/  
 PULPROG zg30  
 TD 65536  
 SOLVENT CDCl3  
 NS 16  
 DS 2  
 SWH 12019.230 Hz  
 FIDRES 0.183399 Hz  
 AQ 2.7262976 sec  
 RG 168.12  
 DW 41.600 usec  
 DE 6.50 usec  
 TE 300.0 K  
 D1 1.00000000 sec  
 TDO 1

----- CHANNEL f1 -----  
 SFO1 600.1337060 MHz  
 NUC1 1H  
 P1 10.00 usec  
 PLW1 26.60000038 W

F2 - Processing parameters  
 SI 65536  
 SF 600.1300152 MHz  
 WDW EM  
 SSB 0  
 LB 0.30 Hz  
 GB 0  
 PC 1.00



S25  
<sup>13</sup>C NMR  
 151 MHz  
 CDCl<sub>3</sub>

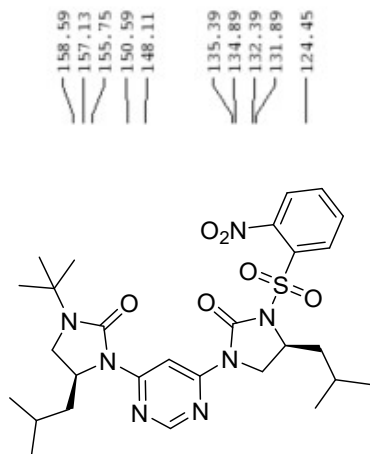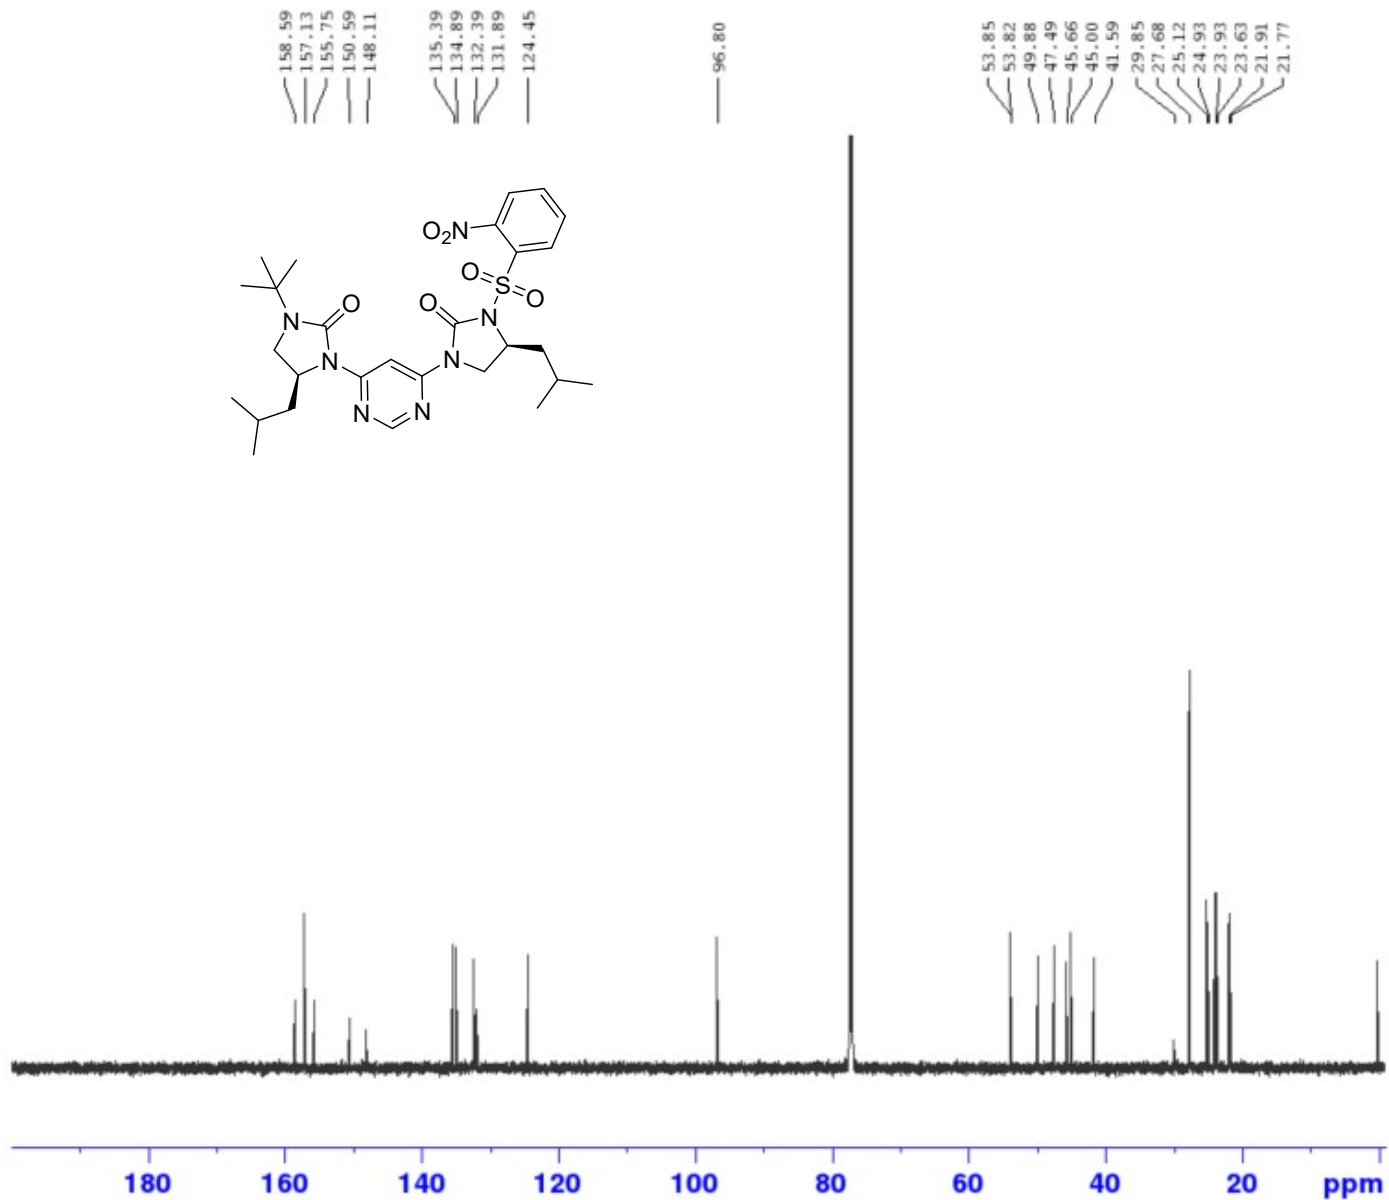

Current Data Parameters  
 NAME TW-A-144 CARBON  
 EXPNO 10  
 PROCNO 1

F2 - Acquisition Parameters  
 Date\_ 20190907  
 Time 22.26  
 INSTRUM spect  
 PROBHD 5 mm PABBO BB/  
 PULPROG zgpg30  
 TD 65536  
 SOLVENT CDC13  
 NS 4092  
 DS 4  
 SWH 36057.691 Hz  
 FIDRES 0.550197 Hz  
 AQ 0.9087659 sec  
 RG 186.92  
 DW 13.867 usec  
 DE 6.50 usec  
 TE 300.0 K  
 D1 2.00000000 sec  
 D11 0.03000000 sec  
 TDO 1

----- CHANNEL f1 -----  
 SFO1 150.9178981 MHz  
 NUC1 13C  
 P1 11.80 usec  
 PLW1 85.00000000 W

----- CHANNEL f2 -----  
 SFO2 600.1324005 MHz  
 NUC2 1H  
 CPDPRG[2] waltz16  
 PCPD2 80.00 usec  
 PLW2 27.00000000 W  
 PLW12 0.43891999 W  
 PLW13 0.28090999 W

F2 - Processing parameters  
 SI 32768  
 SF 150.9027867 MHz  
 WDW EM  
 SSB 0  
 LB 1.00 Hz  
 GB 0  
 PC 1.40

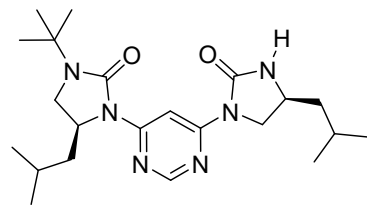

Current Data Parameters  
 NAME TW-A-146-A RERUN  
 EXPNO 50  
 PROCNO 1

F2 - Acquisition Parameters  
 Date\_ 20190425  
 Time 12.45  
 INSTRUM spect  
 PROBHD 5 mm PABBO BB/  
 PULPROG zg30  
 TD 131072  
 SOLVENT CDC13  
 NS 64  
 DS 0  
 SWH 12019.230 Hz  
 FIDRES 0.091699 Hz  
 AQ 5.4525952 sec  
 RG 203  
 DW 41.600 usec  
 DE 9.85 usec  
 TE 300.0 K  
 D1 0.10000000 sec  
 TDO 1

----- CHANNEL f1 -----  
 SFO1 399.9024695 MHz  
 NUC1 1H  
 P1 14.88 usec  
 PLW1 7.59999990 W

F2 - Processing parameters  
 SI 131072  
 SF 399.9000097 MHz  
 WDW EM  
 SSB 0  
 LB 0.10 Hz  
 GB 0  
 PC 1.00

S26  
<sup>1</sup>H NMR  
 400 MHz  
 CDCl<sub>3</sub>

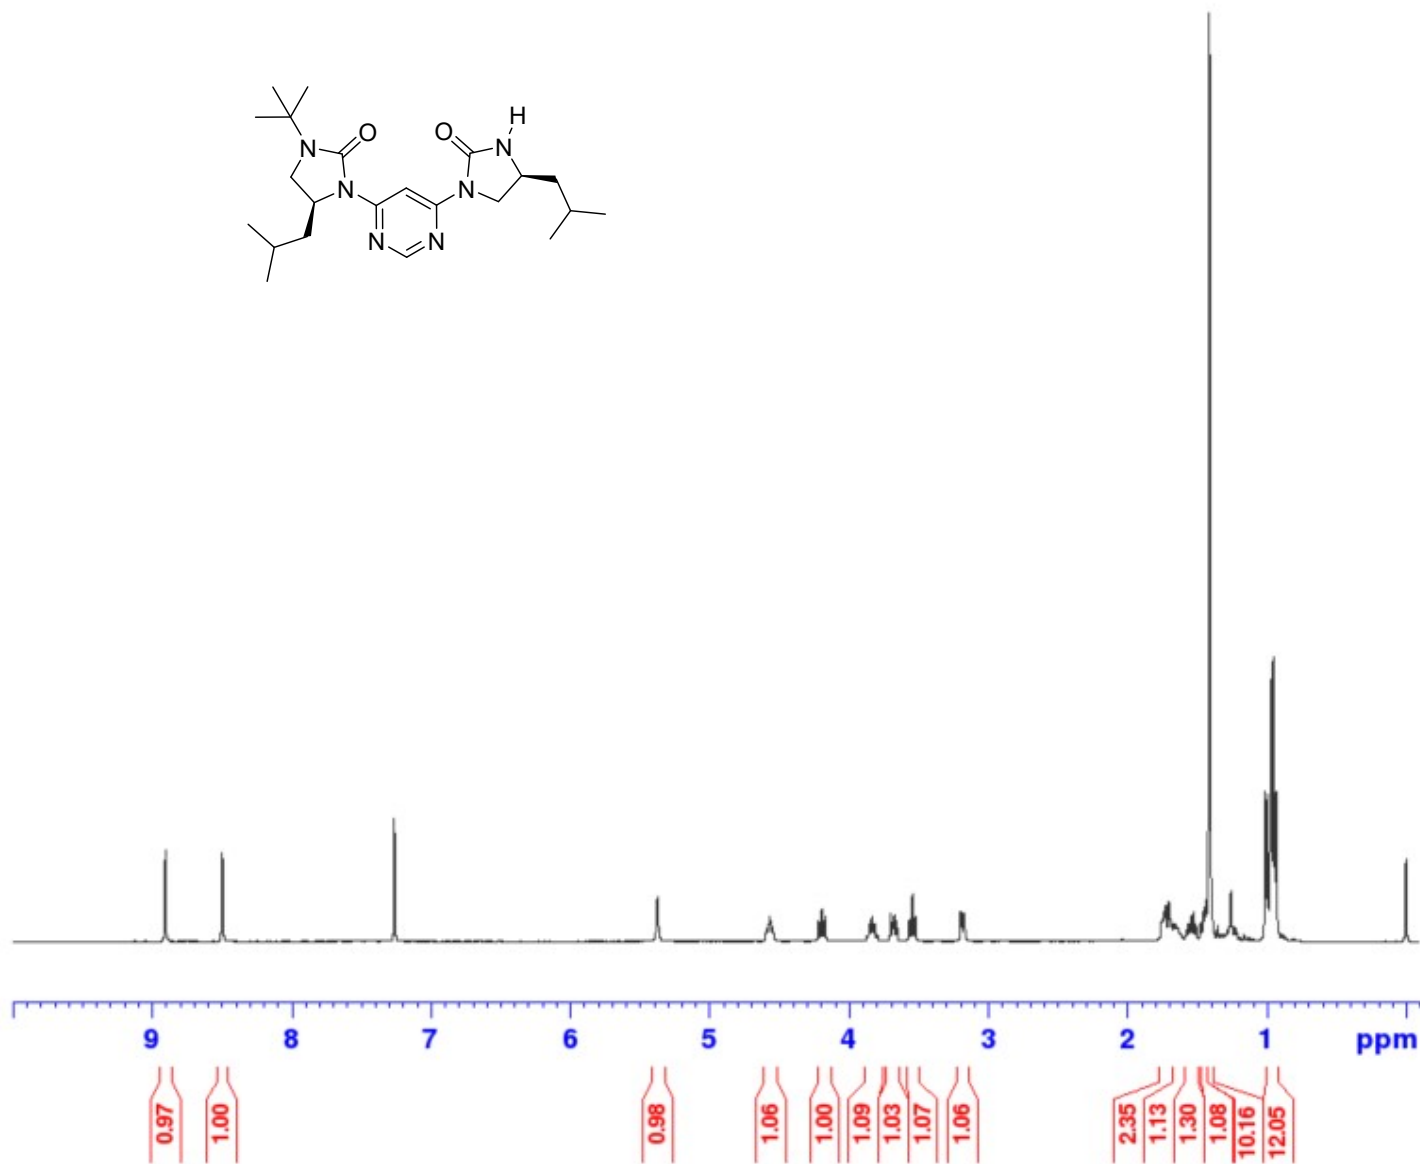

S26  
<sup>13</sup>C NMR  
 101 MHz  
 CDCl<sub>3</sub>

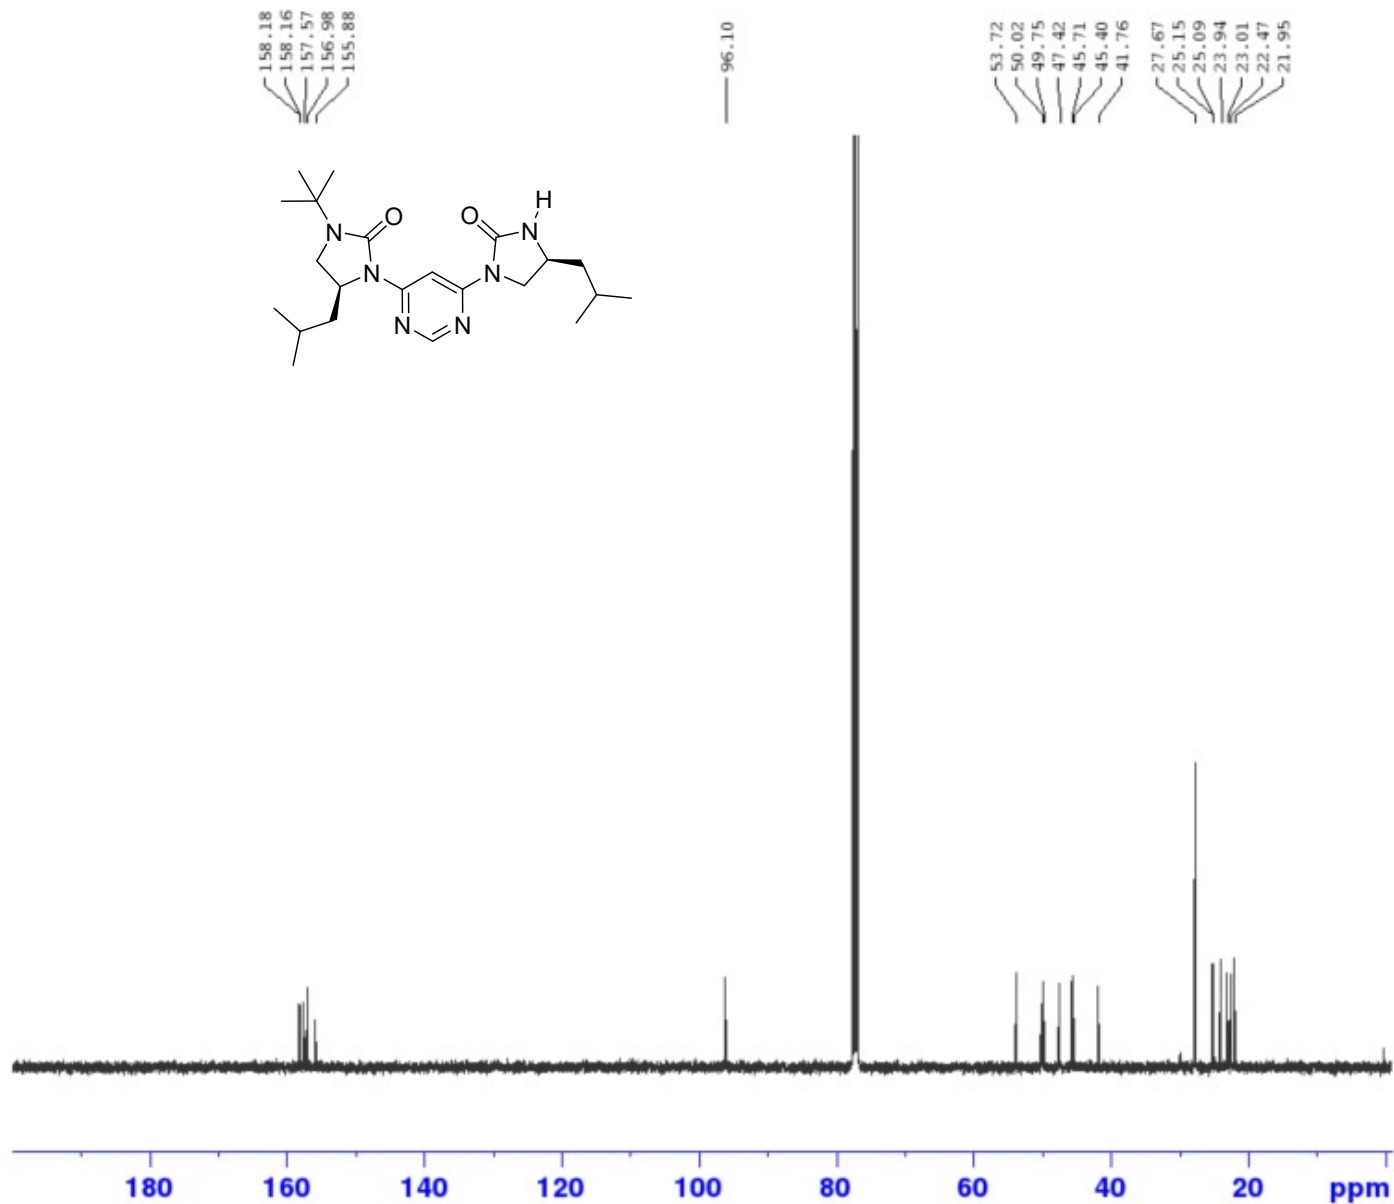

Current Data Parameters  
 NAME TW-A-146-A RERUN  
 EXPNO 52  
 PROCNO 1

F2 - Acquisition Parameters  
 Date\_ 20190426  
 Time 7.50  
 INSTRUM spect  
 PROBHD 5 mm PABBO BB/  
 PULPROG zgpg30  
 TD 65536  
 SOLVENT CDCl3  
 NS 1024  
 DS 4  
 SWH 24038.461 Hz  
 FIDRES 0.366798 Hz  
 AQ 1.3631488 sec  
 RG 203  
 DW 20.800 usec  
 DE 6.50 usec  
 TE 300.0 K  
 D1 2.00000000 sec  
 D11 0.03000000 sec  
 TDO 1

----- CHANNEL f1 -----  
 SFO1 100.5649900 MHz  
 NUC1 13C  
 P1 10.00 usec  
 PLW1 44.46300125 W

----- CHANNEL f2 -----  
 SFO2 399.9015996 MHz  
 NUC2 1H  
 CPDPRG[2] waltz16  
 PCPD2 90.00 usec  
 PLW2 7.59999990 W  
 PLW12 0.20774999 W  
 PLW13 0.16827001 W

F2 - Processing parameters  
 SI 32768  
 SF 100.5549210 MHz  
 WDW EM  
 SSB 0  
 LB 1.00 Hz  
 GB 0  
 PC 1.40

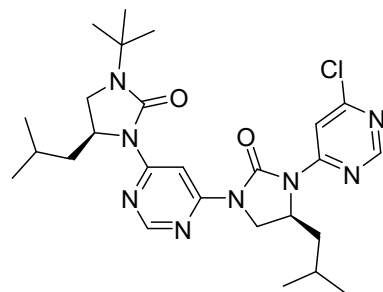

**1c**  
<sup>1</sup>H NMR  
 600 MHz  
 CDCl<sub>3</sub>

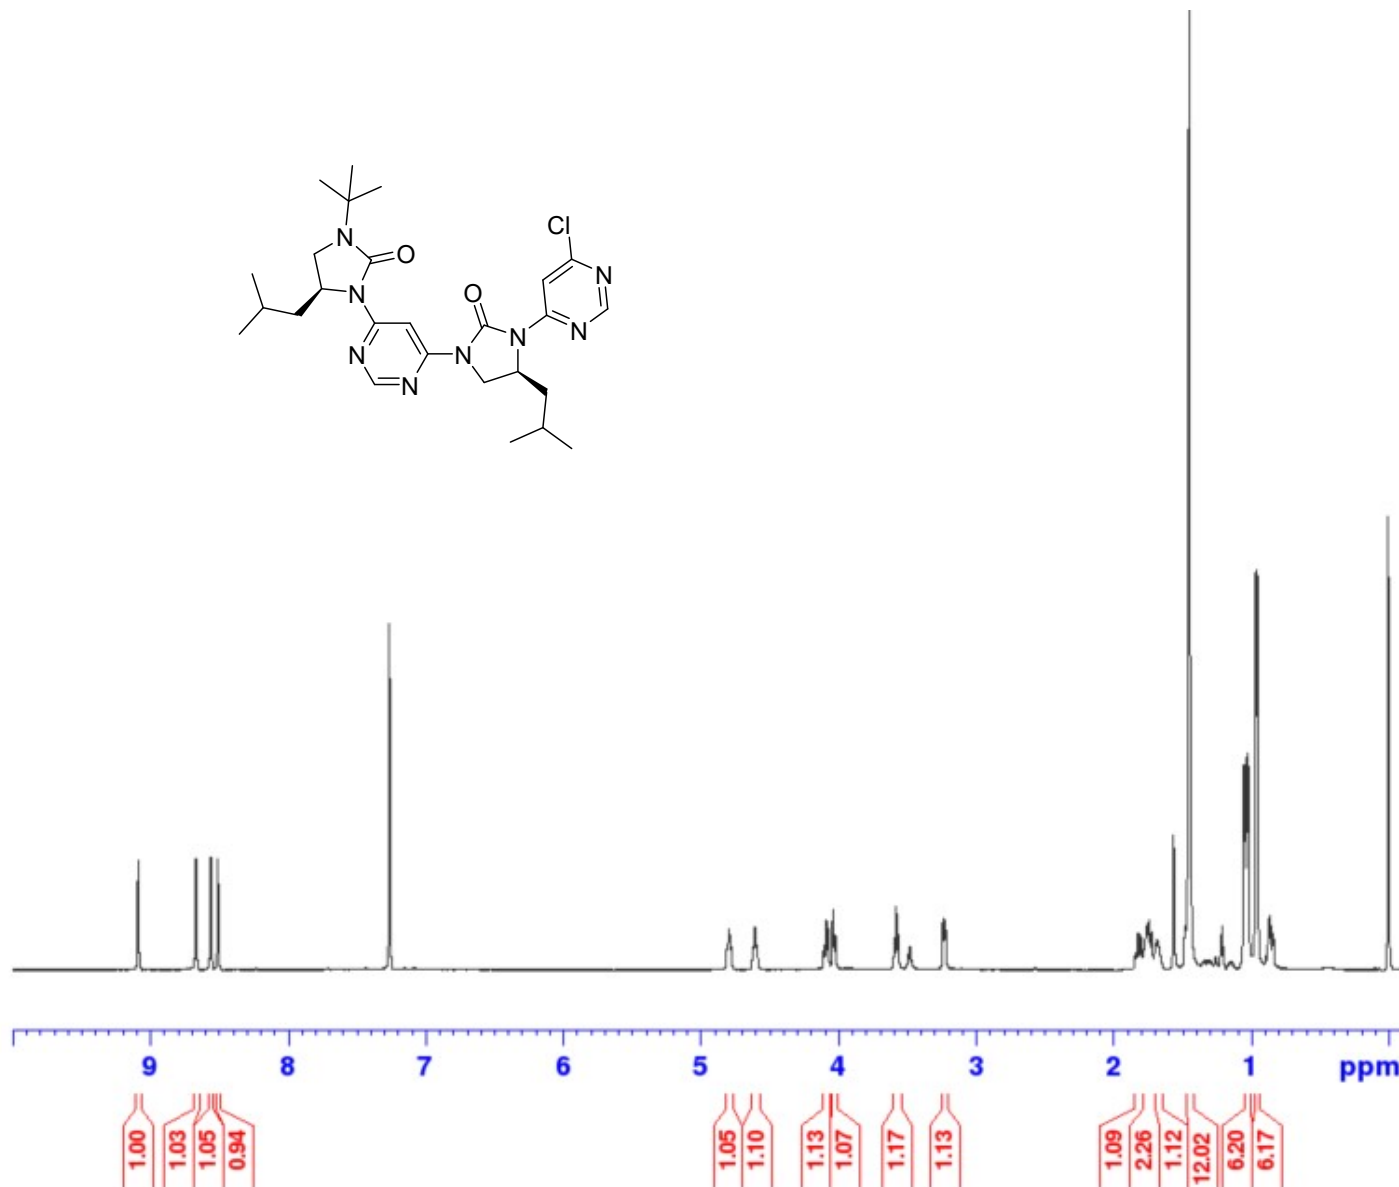

```

Current Data Parameters
NAME      TW-A-108 600 TRIT
EXPNO     10
PROCNO    1

F2 - Acquisition Parameters
Date_     20190909
Time      17.05
INSTRUM   spect
PROBHD    5 mm PABBO BB/
PULPROG   zg30
TD        65536
SOLVENT   CDCl3
NS        16
DS        2
SWH       12019.230 Hz
FIDRES    0.183399 Hz
AQ        2.7262976 sec
RG        168.12
DW        41.600 usec
DE        6.50 usec
TE        300.0 K
D1        1.00000000 sec
TDO       1

----- CHANNEL f1 -----
SF01      600.1337060 MHz
NUC1      1H
P1        10.00 usec
PLW1      26.60000038 W

F2 - Processing parameters
SI        65536
SF        600.1300152 MHz
WDW       EM
SSB       0
LB        0.30 Hz
GB        0
PC        1.00
  
```

1c  
<sup>13</sup>C NMR  
 151 MHz  
 CDCl<sub>3</sub>

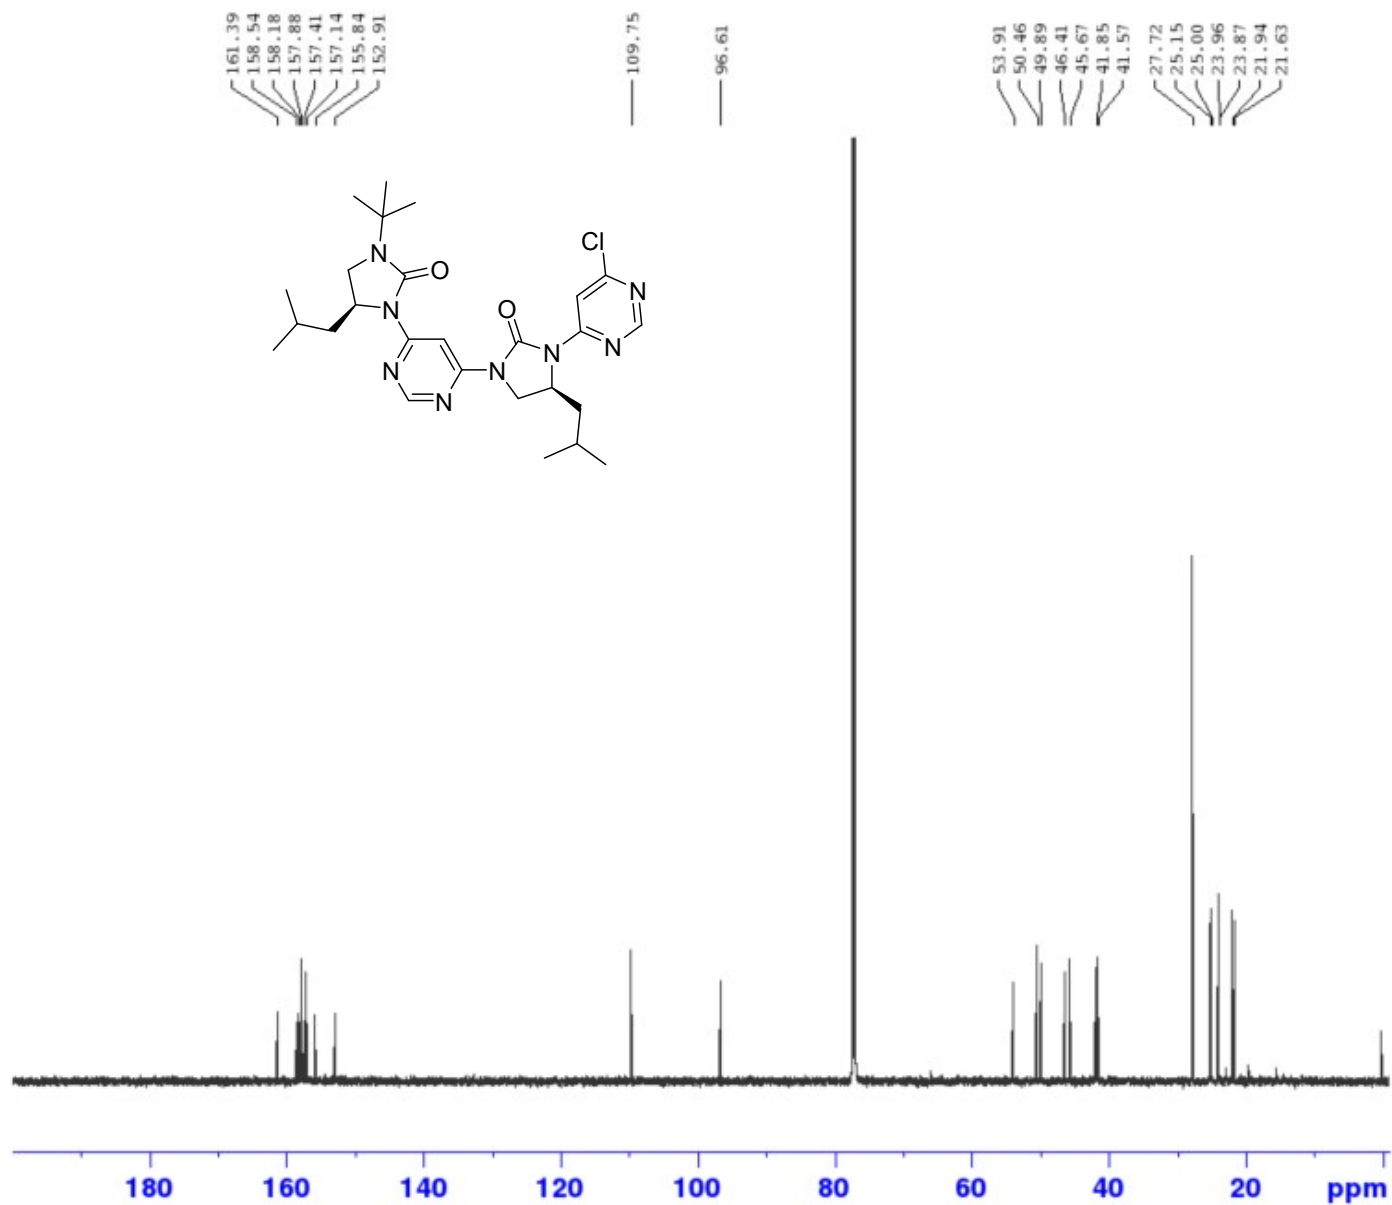

Current Data Parameters  
 NAME TW-A-108 CARBON  
 EXPNO 10  
 PROCNO 1

F2 - Acquisition Parameters  
 Date\_ 20190910  
 Time 21.25  
 INSTRUM spect  
 PROBHD 5 mm PABBO BB/  
 PULPROG zgpg30  
 TD 65536  
 SOLVENT CDC13  
 NS 2048  
 DS 4  
 SWH 36057.691 Hz  
 FIDRES 0.550197 Hz  
 AQ 0.9087659 sec  
 RG 186.92  
 DW 13.867 usec  
 DE 6.50 usec  
 TE 300.0 K  
 D1 2.0000000 sec  
 D11 0.03000000 sec  
 TDO 1

----- CHANNEL f1 -----  
 SFO1 150.9178981 MHz  
 NUC1 13C  
 P1 11.80 usec  
 PLW1 85.00000000 W

----- CHANNEL f2 -----  
 SFO2 600.1324005 MHz  
 NUC2 1H  
 CPDPRG[2] waltz16  
 PCPD2 80.00 usec  
 PLW2 27.00000000 W  
 PLW12 0.43891999 W  
 PLW13 0.28090999 W

F2 - Processing parameters  
 SI 32768  
 SF 150.9027883 MHz  
 WDW EM  
 SSB 0  
 LB 1.00 Hz  
 GB 0  
 PC 1.40

Current Data Parameters  
NAME TW-A-164-A  
EXPNO 10  
PROCNO 1

F2 - Acquisition Parameters  
Date\_ 20190128  
Time 15.41  
INSTRUM spect  
PROBHD 5 mm PABBO BB/  
PULPROG zg30  
TD 131072  
SOLVENT CDCl3  
NS 16  
DS 0  
SWH 12019.230 Hz  
FIDRES 0.091699 Hz  
AQ 5.4525952 sec  
RG 80.6  
DW 41.600 usec  
DE 9.85 usec  
TE 300.0 K  
D1 0.10000000 sec  
TD0 1

----- CHANNEL f1 -----  
SF01 399.9024695 MHz  
NUC1 1H  
P1 14.88 usec  
PLW1 7.59999990 W

F2 - Processing parameters  
SI 131072  
SF 399.9000060 MHz  
WDW EM  
SSB 0  
LB 0.10 Hz  
GB 0  
PC 1.00

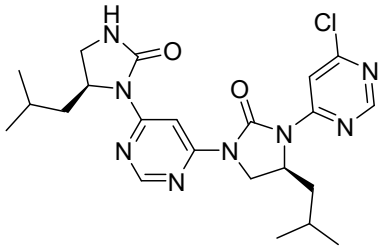

2c

<sup>1</sup>H NMR

600 MHz

CDCl<sub>3</sub>

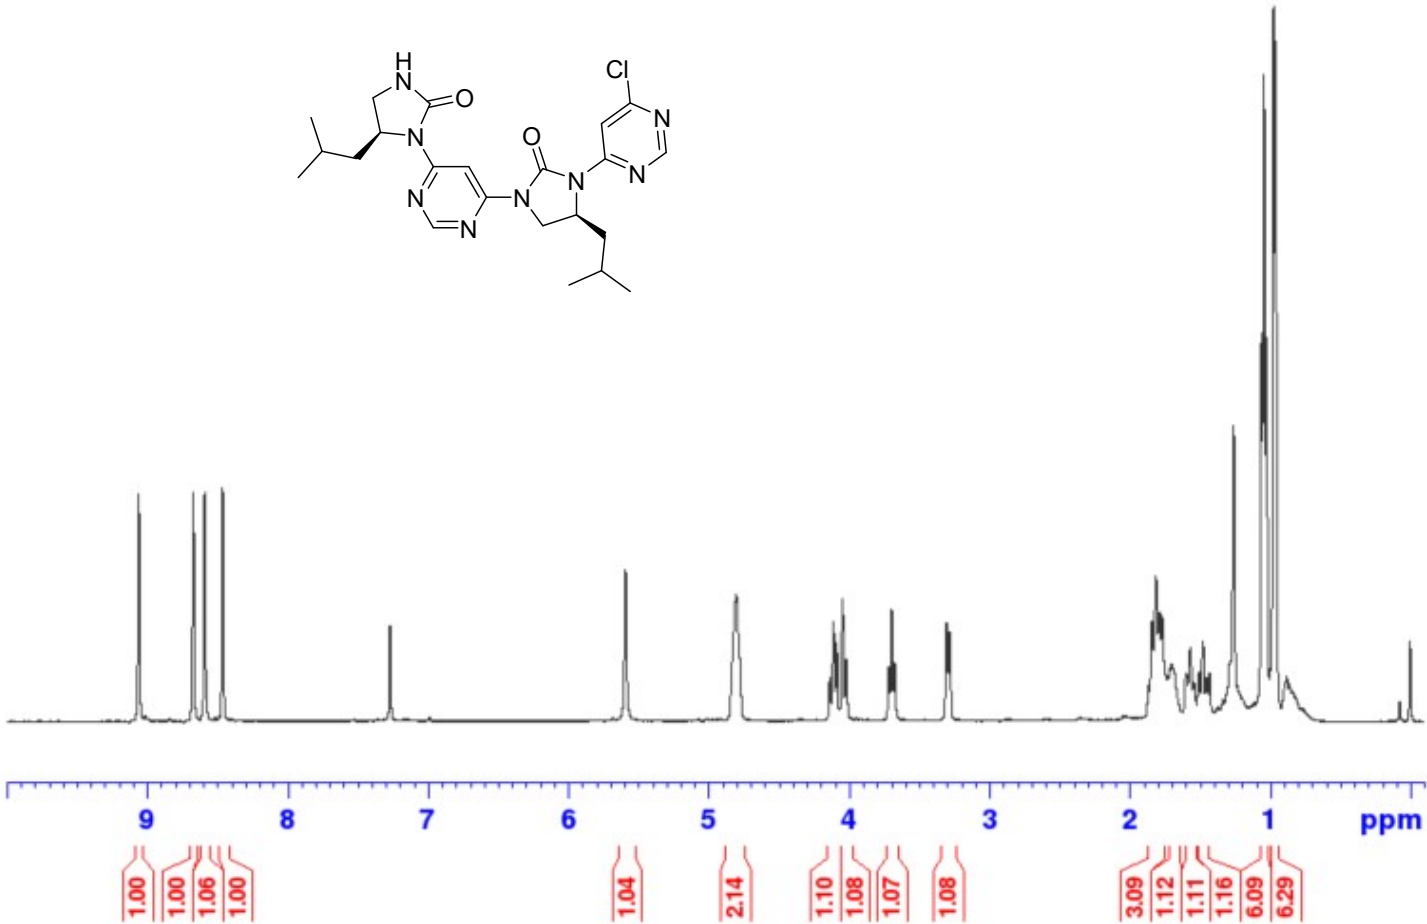

2c  
<sup>13</sup>C NMR  
 151 MHz  
 CDCl<sub>3</sub>

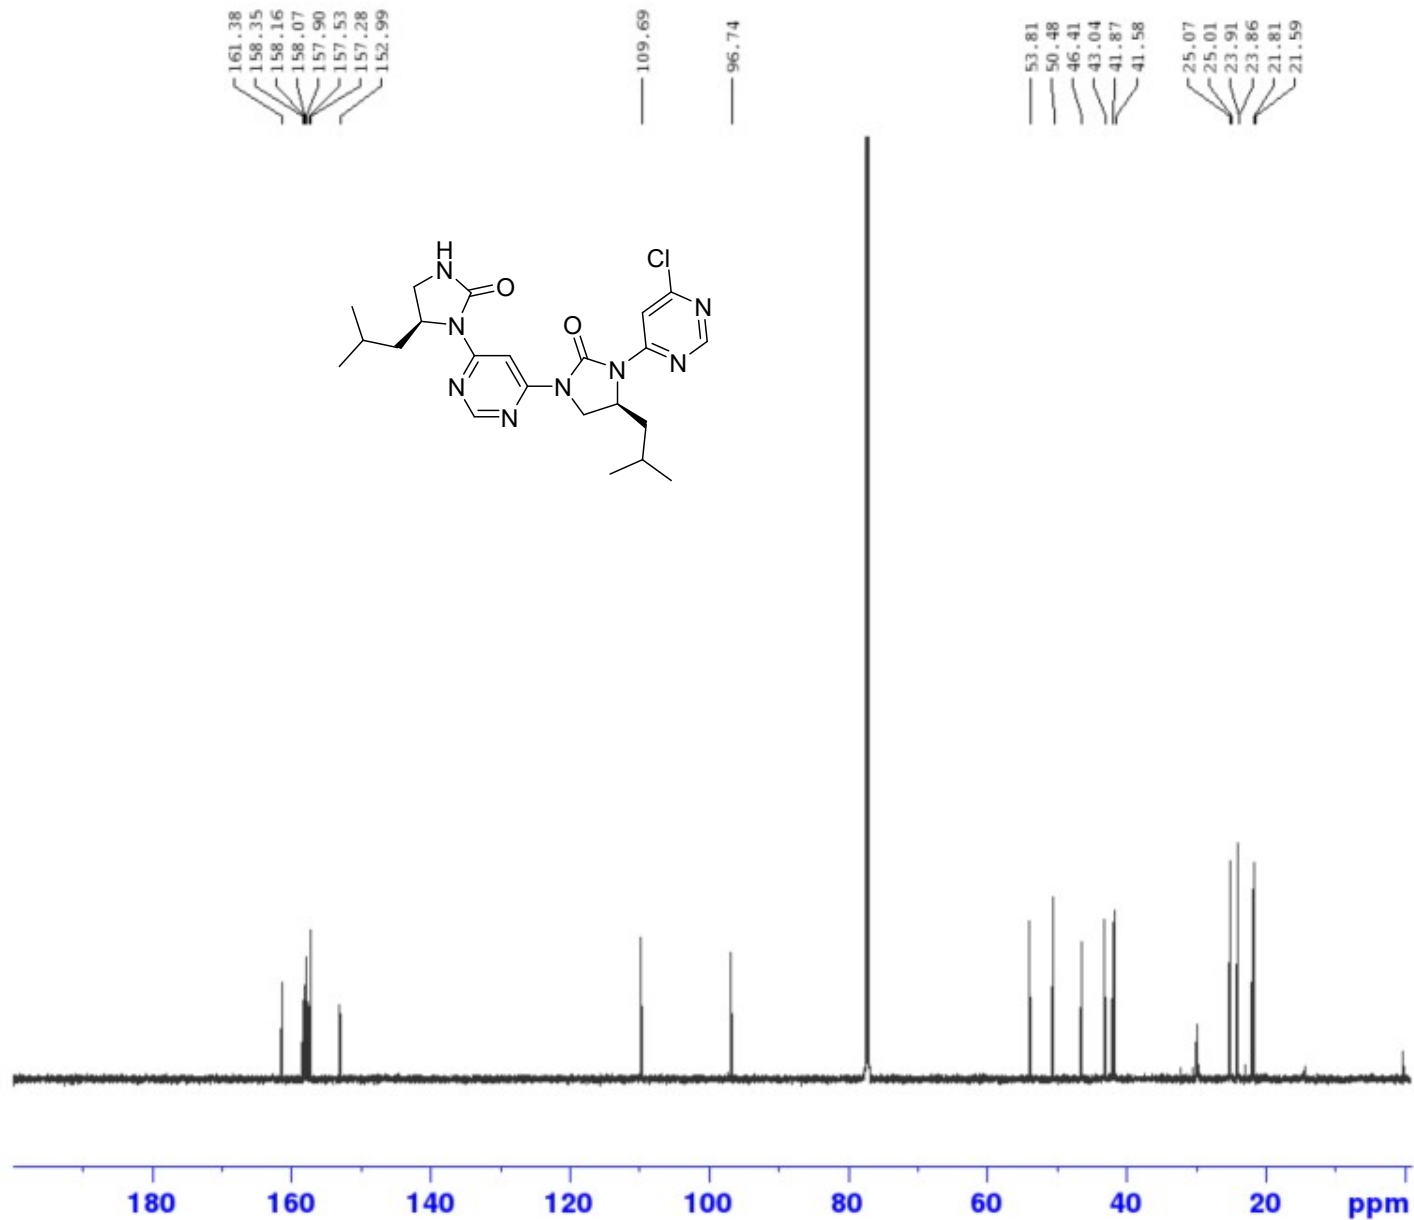

Current Data Parameters  
 NAME TW-B-164 600  
 EXPNO 11  
 PROCNO 1

F2 - Acquisition Parameters  
 Date\_ 20190904  
 Time 7.36  
 INSTRUM spect  
 PROBHD 5 mm PABBO BB/  
 PULPROG zgpg30  
 TD 65536  
 SOLVENT CDCl3  
 NS 1024  
 DS 4  
 SWH 36057.691 Hz  
 FIDRES 0.550197 Hz  
 AQ 0.9087659 sec  
 RG 186.92  
 DW 13.867 usec  
 DE 6.50 usec  
 TE 300.0 K  
 D1 2.00000000 sec  
 D11 0.03000000 sec  
 TDO 1

===== CHANNEL f1 =====  
 SFO1 150.9178981 MHz  
 NUC1 13C  
 P1 11.80 usec  
 PLW1 85.00000000 W

===== CHANNEL f2 =====  
 SFO2 600.1324005 MHz  
 NUC2 1H  
 CPDPRG[2] waltz16  
 PCPD2 80.00 usec  
 PLW2 27.00000000 W  
 PLW12 0.43891999 W  
 PLW13 0.28090999 W

F2 - Processing parameters  
 SI 32768  
 SF 150.9027897 MHz  
 WDW EM  
 SSB 0  
 LB 1.00 Hz  
 GB 0  
 PC 1.40

S27  
<sup>1</sup>H NMR  
600 MHz  
CDCl<sub>3</sub>

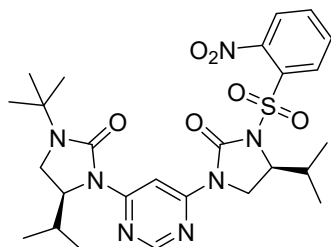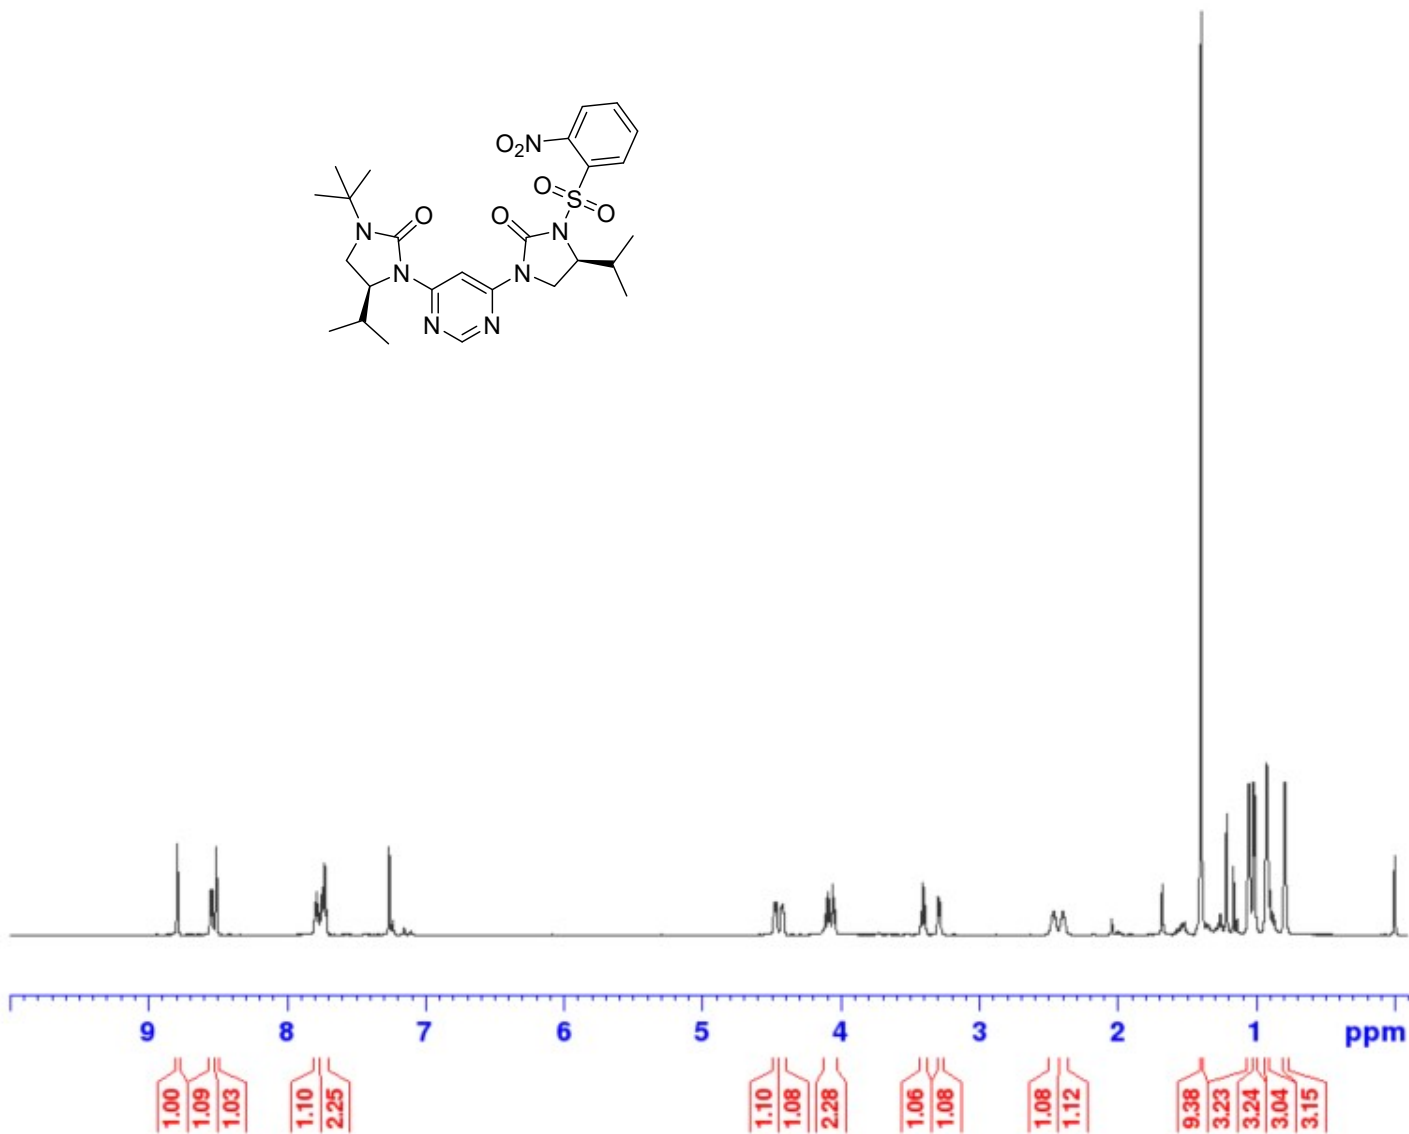

Current Data Parameters  
NAME TW-B-231-A 600  
EXPNO 40  
PROCNO 1

F2 - Acquisition Parameters  
Date\_ 20190830  
Time 21.07  
INSTRUM spect  
PROBHD 5 mm PABBO BB/  
PULPROG zg30  
TD 65536  
SOLVENT CDCl3  
NS 16  
DS 2  
SWH 12019.230 Hz  
FIDRES 0.183399 Hz  
AQ 2.7262976 sec  
RG 105.21  
DW 41.600 usec  
DE 6.50 usec  
TE 300.0 K  
D1 1.00000000 sec  
TDO 1

----- CHANNEL f1 -----  
SFO1 600.1337060 MHz  
NUC1 1H  
P1 10.00 usec  
PLW1 26.60000038 W

F2 - Processing parameters  
SI 65536  
SF 600.1300155 MHz  
WDW EM  
SSB 0  
LB 0.30 Hz  
GB 0  
PC 1.00



S27  
<sup>13</sup>C NMR  
 151 MHz  
 CDCl<sub>3</sub>

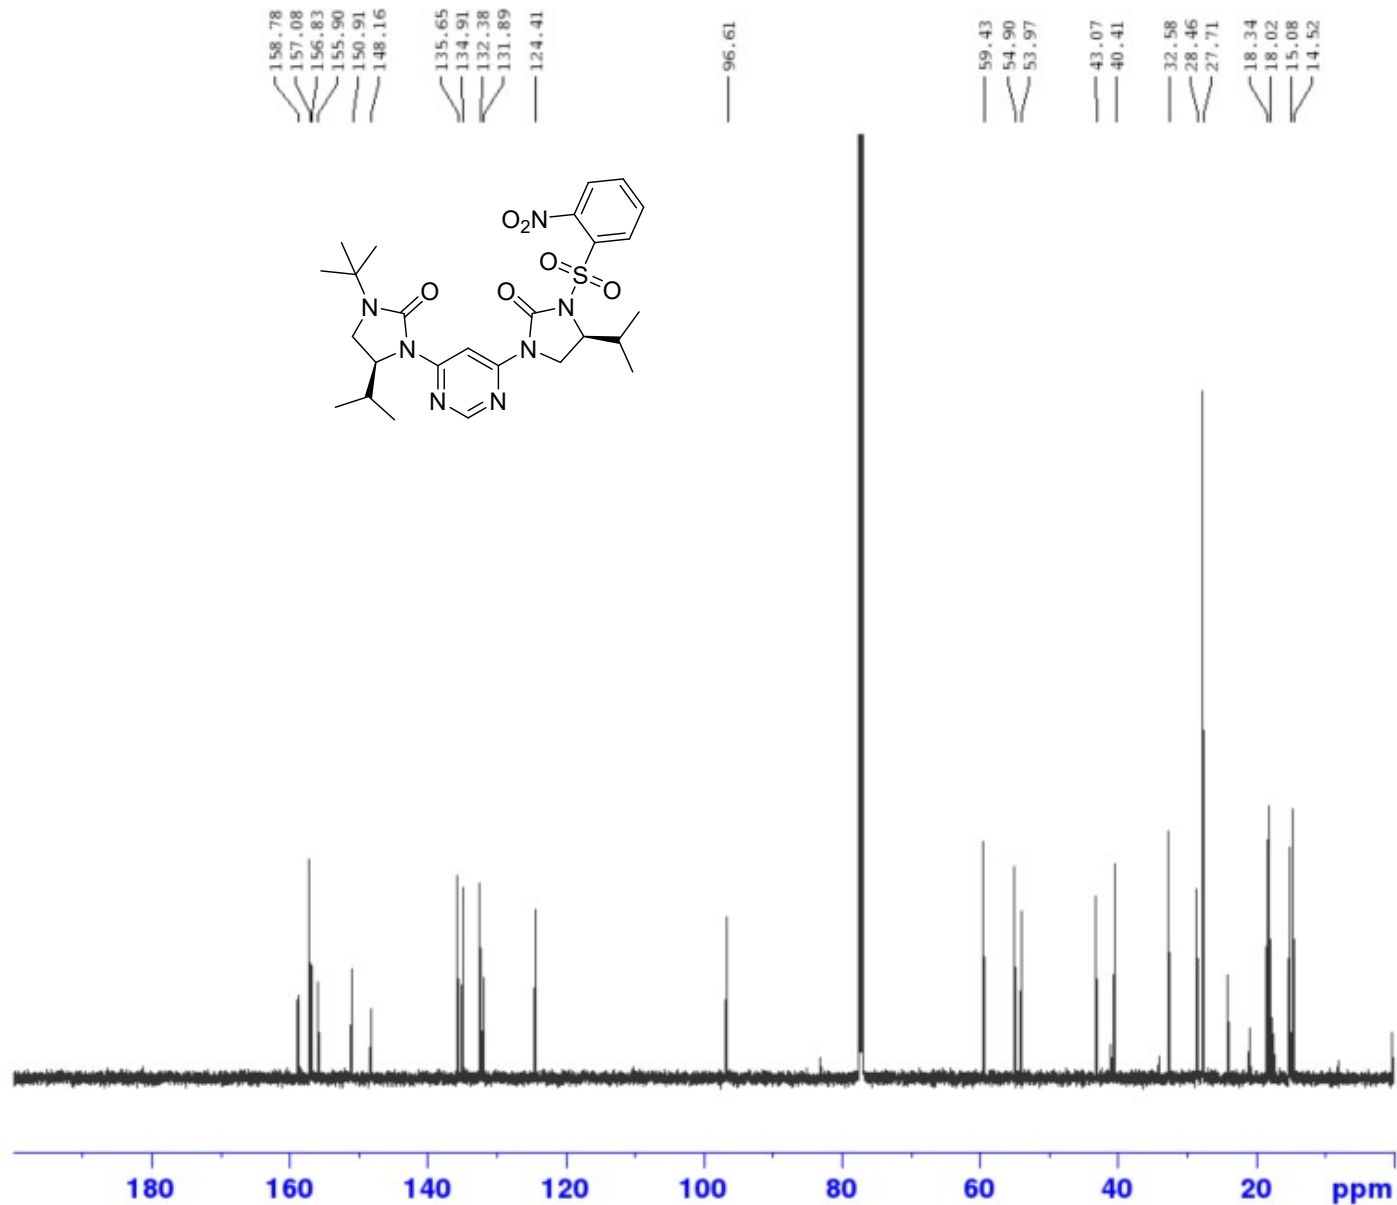

```

Current Data Parameters
NAME      TW-B-231-A 600
EXPNO     42
PROCNO    1

F2 - Acquisition Parameters
Date_     20190830
Time      21.59
INSTRUM   spect
PROBHD    5 mm PABBO BB/
PULPROG   zgpg30
TD        65536
SOLVENT   CDCl3
NS        1024
DS        4
SWH       36057.691 Hz
FIDRES    0.550197 Hz
AQ        0.9087659 sec
RG        186.92
DW        13.867 usec
DE        6.50 usec
TE        300.0 K
D1        2.00000000 sec
D11       0.03000000 sec
TDO       1

===== CHANNEL f1 =====
SFO1      150.9178981 MHz
NUC1      13C
P1        11.80 usec
PLW1      85.00000000 W

===== CHANNEL f2 =====
SFO2      600.1324005 MHz
NUC2      1H
CPDPRG[2] waltz16
PCPD2     80.00 usec
PLW2      27.00000000 W
PLW12     0.43891999 W
PLW13     0.28090999 W

F2 - Processing parameters
SI        32768
SF        150.9027885 MHz
WDW       EM
SSB       0
LB        1.00 Hz
GB        0
PC        1.40
  
```

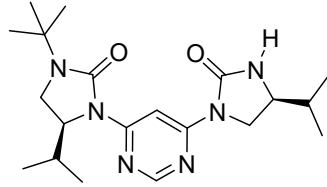

Current Data Parameters  
 NAME TW-A-176-A RERUN  
 EXPNO 90  
 PROCNO 1

F2 - Acquisition Parameters  
 Date\_ 20190427  
 Time 21.19  
 INSTRUM spect  
 PROBHD 5 mm PABBO BB/  
 PULPROG zg30  
 TD 131072  
 SOLVENT CDC13  
 NS 64  
 DS 0  
 SWH 12019.230 Hz  
 FIDRES 0.091699 Hz  
 AQ 5.4525952 sec  
 RG 101  
 DW 41.600 usec  
 DE 9.85 usec  
 TE 300.0 K  
 D1 0.10000000 sec  
 TDO 1

----- CHANNEL f1 -----  
 SFO1 399.9024695 MHz  
 NUC1 1H  
 P1 14.88 usec  
 PLW1 7.59999990 W

F2 - Processing parameters  
 SI 131072  
 SF 399.9000096 MHz  
 WDW EM  
 SSB 0  
 LB 0.10 Hz  
 GB 0  
 PC 1.00

S28  
<sup>1</sup>H NMR  
 400 MHz  
 CDCl<sub>3</sub>

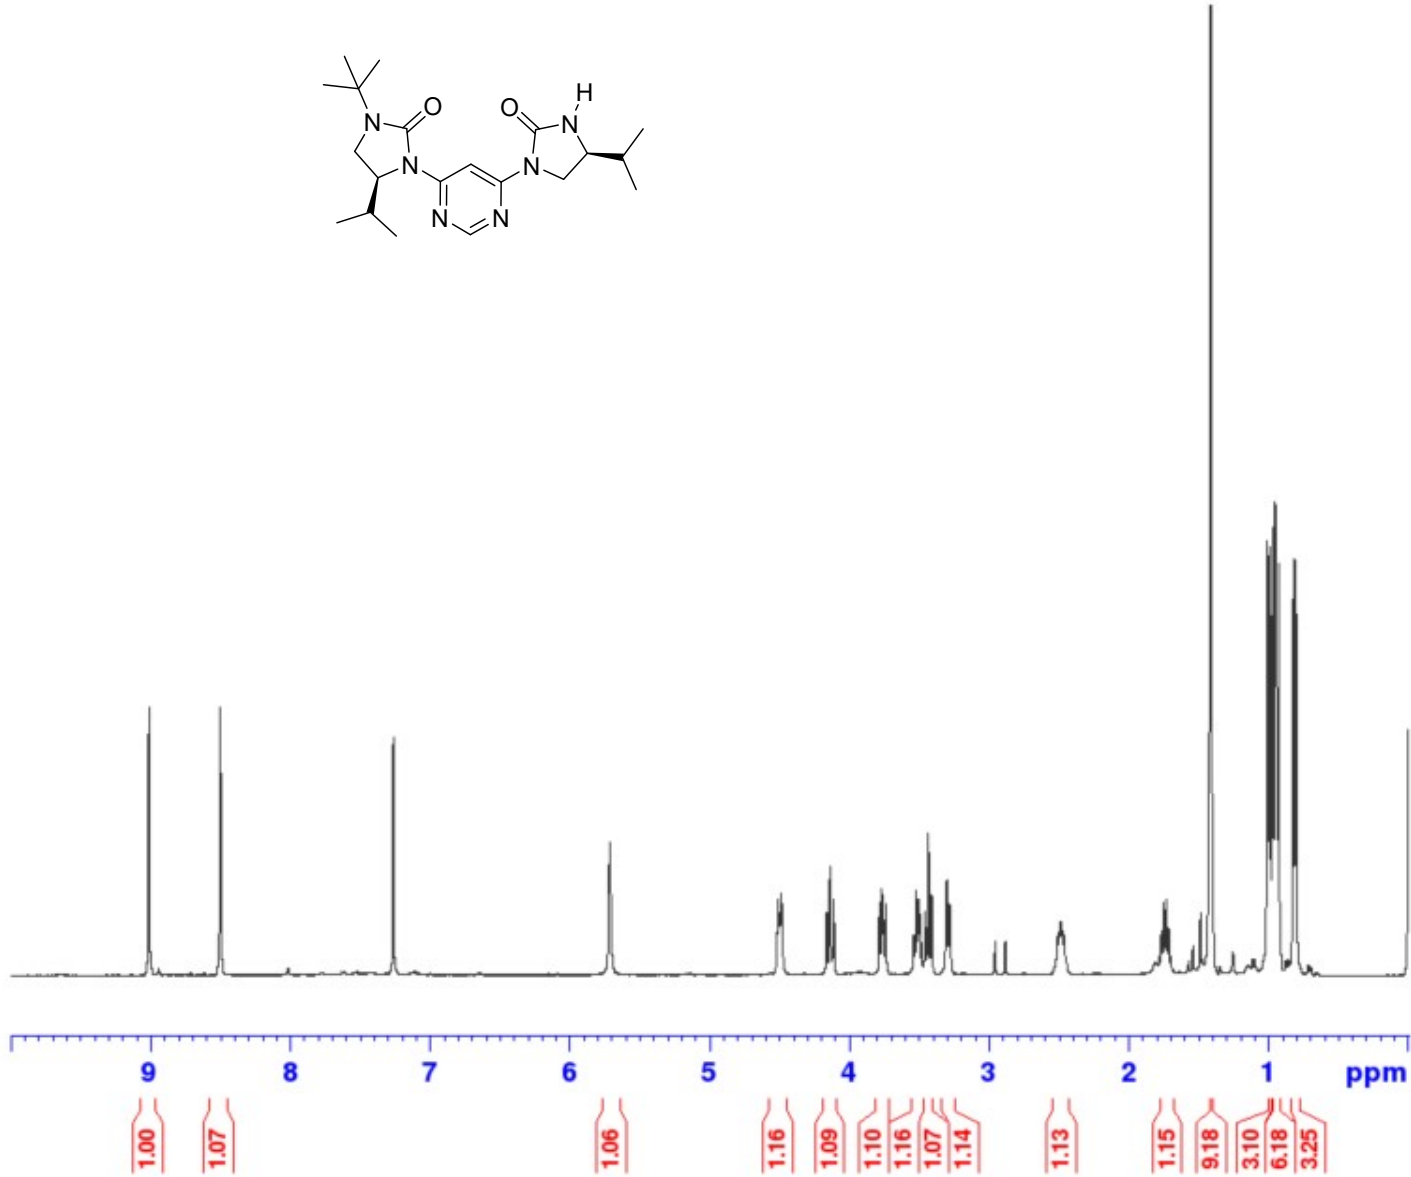

S28  
<sup>13</sup>C NMR  
 101 MHz  
 CDCl<sub>3</sub>

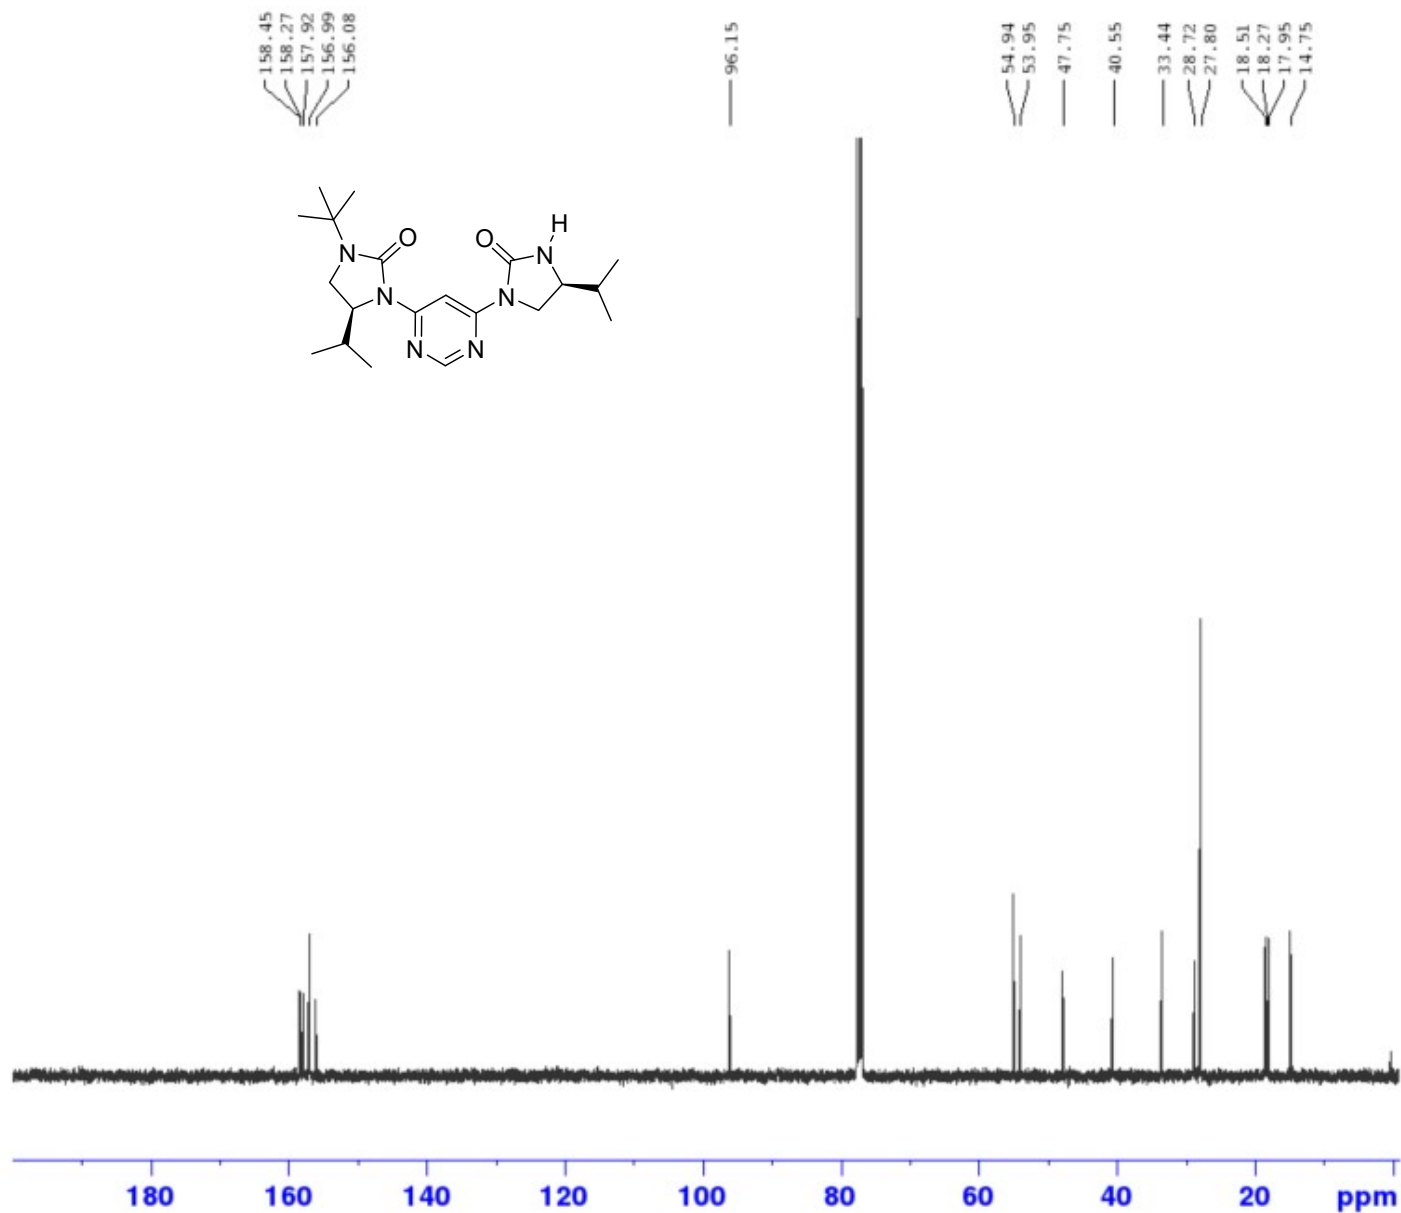

Current Data Parameters  
 NAME TW-A-176-A RERUN  
 EXPNO 92  
 PROCNO 1

F2 - Acquisition Parameters  
 Date\_ 20190429  
 Time 7.50  
 INSTRUM spect  
 PROBHD 5 mm PABBO BB/  
 PULPROG zgpg30  
 TD 65536  
 SOLVENT CDC13  
 NS 1024  
 DS 4  
 SWH 24038.461 Hz  
 FIDRES 0.366798 Hz  
 AQ 1.3631488 sec  
 RG 203  
 DW 20.800 usec  
 DE 6.50 usec  
 TE 300.0 K  
 D1 2.00000000 sec  
 D11 0.03000000 sec  
 TDO 1

===== CHANNEL f1 =====  
 SFO1 100.5649900 MHz  
 NUC1 13C  
 P1 10.00 usec  
 PLW1 44.46300125 W

===== CHANNEL f2 =====  
 SFO2 399.9015996 MHz  
 NUC2 1H  
 CPDPRG[2] waltz16  
 PCPD2 90.00 usec  
 PLW2 7.59999990 W  
 PLW12 0.20774999 W  
 PLW13 0.16827001 W

F2 - Processing parameters  
 SI 32768  
 SF 100.5549112 MHz  
 WDW EM  
 SSB 0  
 LB 1.00 Hz  
 GB 0  
 PC 1.40

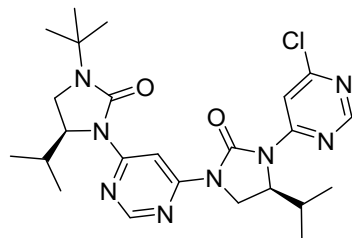

**1d**  
<sup>1</sup>H NMR  
 400 MHz  
 CDCl<sub>3</sub>

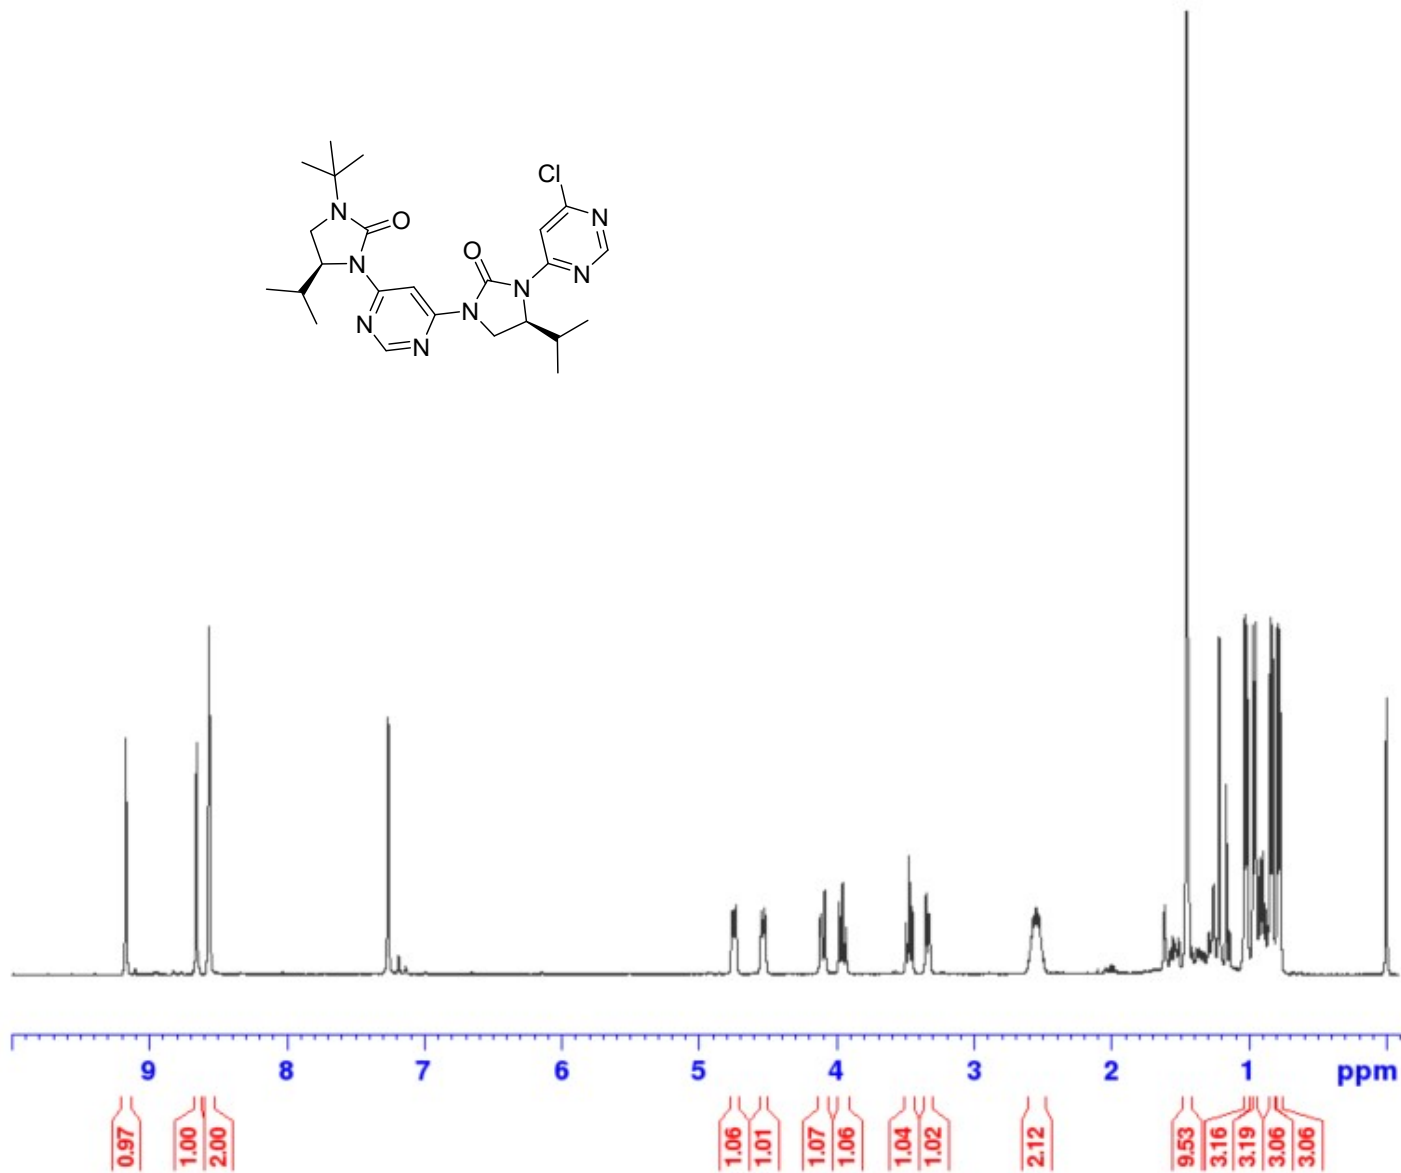

Current Data Parameters  
 NAME TW-A-178 RERUN  
 EXPNO 11  
 PROCNO 1

F2 - Acquisition Parameters  
 Date\_ 20190427  
 Time 21.29  
 INSTRUM spect  
 PROBHD 5 mm PABBO BB/  
 PULPROG zg30  
 TD 131072  
 SOLVENT CDCl3  
 NS 64  
 DS 0  
 SWH 12019.230 Hz  
 FIDRES 0.091699 Hz  
 AQ 5.4525952 sec  
 RG 203  
 DW 41.600 usec  
 DE 9.85 usec  
 TE 300.0 K  
 D1 0.1000000 sec  
 TDO 1

----- CHANNEL f1 -----  
 SFO1 399.9024695 MHz  
 NUC1 1H  
 P1 14.88 usec  
 PLW1 7.59999990 W

F2 - Processing parameters  
 SI 131072  
 SF 399.9000099 MHz  
 WDW EM  
 SSB 0  
 LB 0.10 Hz  
 GB 0  
 PC 1.00

**1d**  
<sup>13</sup>C NMR  
 101 MHz  
 CDCl<sub>3</sub>

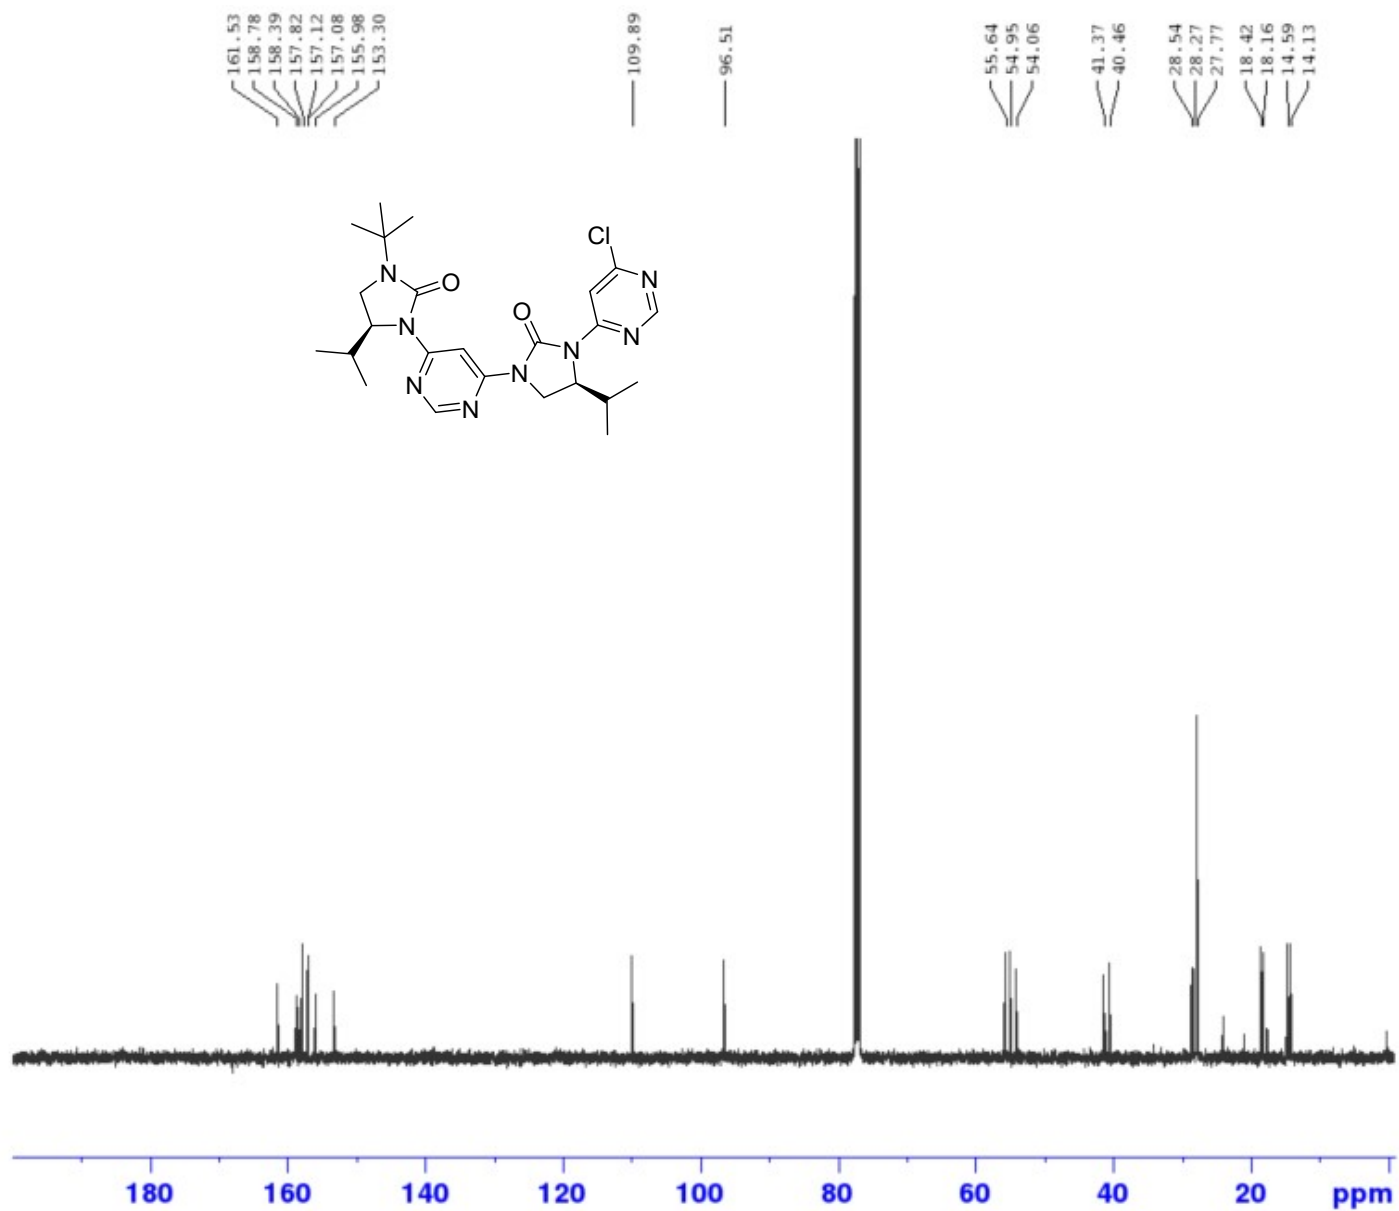

```

Current Data Parameters
NAME      TW-A-178  RERUN
EXPNO    12
PROCNO   1

F2 - Acquisition Parameters
Date_    20190429
Time     19.03
INSTRUM  spect
PROBHD   5 mm PABBO BB/
PULPROG  zgpg30
TD       65536
SOLVENT  CDCl3
NS       1024
DS       4
SWH      24038.461 Hz
FIDRES   0.366798 Hz
AQ       1.3631488 sec
RG       181
DW       20.800 usec
DE       6.50 usec
TE       300.0 K
D1       2.0000000 sec
D11      0.03000000 sec
TDO      1

===== CHANNEL f1 =====
SFO1    100.5649900 MHz
NUC1     13C
P1       10.00 usec
PLW1    44.46300125 W

===== CHANNEL f2 =====
SFO2    399.9015996 MHz
NUC2     1H
CPDPRG2  waltz16
PCPD2    90.00 usec
PLW2     7.59999990 W
PLW12    0.20774999 W
PLW13    0.16827001 W

F2 - Processing parameters
SI       32768
SF       100.5549209 MHz
WDW      EM
SSB      0
LB       1.00 Hz
GB       0
PC       1.40
  
```

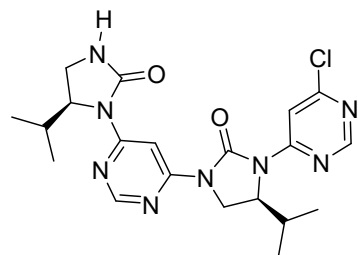

Current Data Parameters  
 NAME TW-A-179 RERUN  
 EXPNO 80  
 PROCNO 1

F2 - Acquisition Parameters  
 Date\_ 20190427  
 Time 21.38  
 INSTRUM spect  
 PROBHD 5 mm PABBO BB/  
 PULPROG zg30  
 TD 131072  
 SOLVENT CDC13  
 NS 64  
 DS 0  
 SWH 12019.230 Hz  
 FIDRES 0.091699 Hz  
 AQ 5.4525952 sec  
 RG 203  
 DW 41.600 usec  
 DE 9.85 usec  
 TE 300.0 K  
 D1 0.10000000 sec  
 TDO 1

----- CHANNEL f1 -----  
 SFO1 399.9024695 MHz  
 NUC1 1H  
 P1 14.88 usec  
 PLW1 7.59999990 W

F2 - Processing parameters  
 SI 131072  
 SF 399.9000099 MHz  
 WDW EM  
 SSB 0  
 LB 0.10 Hz  
 GB 0  
 PC 1.00

**2d**  
<sup>1</sup>H NMR  
 400 MHz  
 CDCl<sub>3</sub>

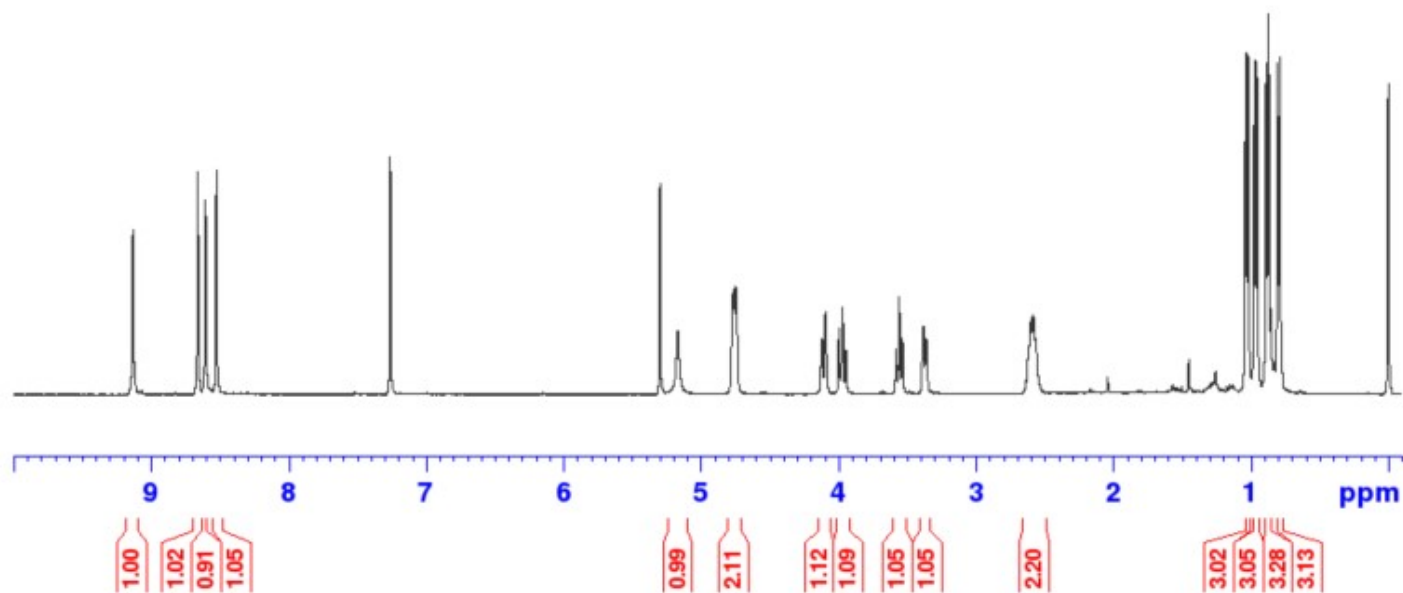

2d  
<sup>13</sup>C NMR  
 101 MHz  
 CDCl<sub>3</sub>

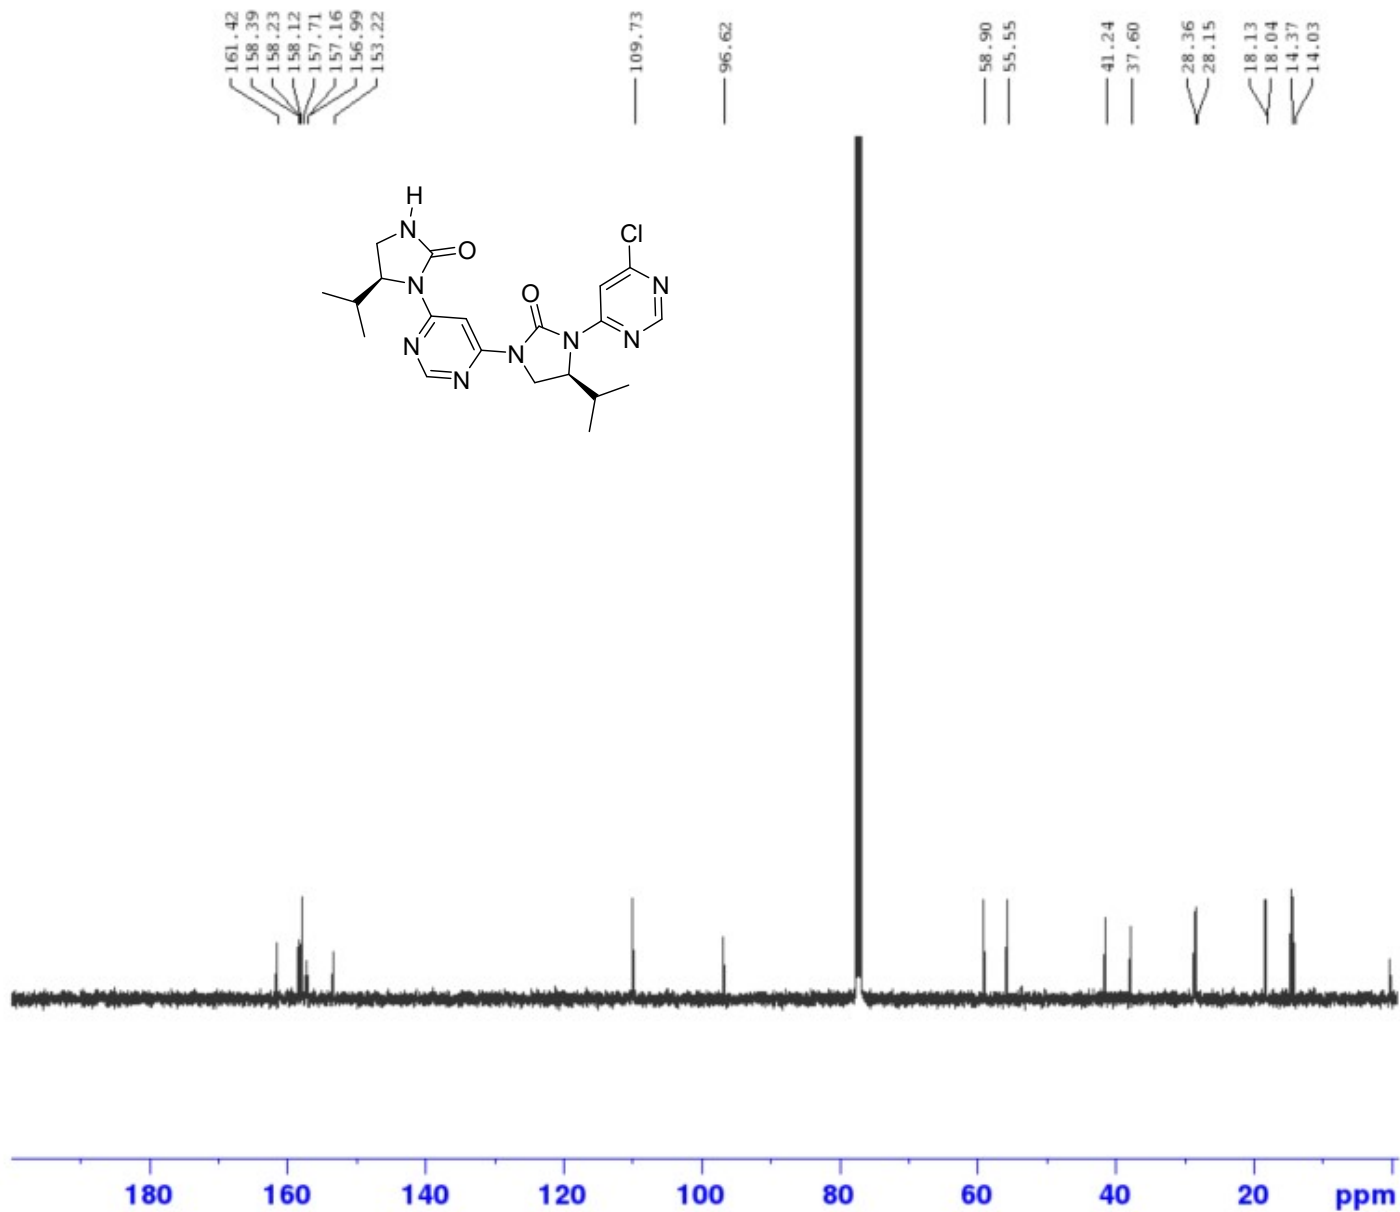

Current Data Parameters  
 NAME TW-A-179 RERUN  
 EXPNO 82  
 PROCNO 1

F2 - Acquisition Parameters  
 Date\_ 20190427  
 Time 22.51  
 INSTRUM spect  
 PROBHD 5 mm PABBO BB/  
 PULPROG zgpg30  
 TD 65536  
 SOLVENT CDC13  
 NS 1024  
 DS 4  
 SWH 24038.461 Hz  
 FIDRES 0.366798 Hz  
 AQ 1.3631488 sec  
 RG 203  
 DW 20.800 usec  
 DE 6.50 usec  
 TE 300.0 K  
 D1 2.00000000 sec  
 D11 0.03000000 sec  
 TDO 1

----- CHANNEL f1 -----  
 SFO1 100.5649900 MHz  
 NUC1 13C  
 P1 10.00 usec  
 PLW1 44.46300125 W

----- CHANNEL f2 -----  
 SFO2 399.9015996 MHz  
 NUC2 1H  
 CPDPRG[2] waltz16  
 PCPD2 90.00 usec  
 PLW2 7.59999990 W  
 PLW12 0.20774999 W  
 PLW13 0.16827001 W

F2 - Processing parameters  
 SI 32768  
 SF 100.5549208 MHz  
 WDW EM  
 SSB 0  
 LB 1.00 Hz  
 GB 0  
 PC 1.40

S29  
1H NMR  
400 MHz  
CDCl<sub>3</sub>

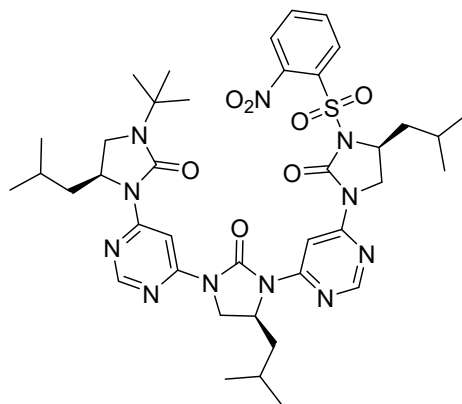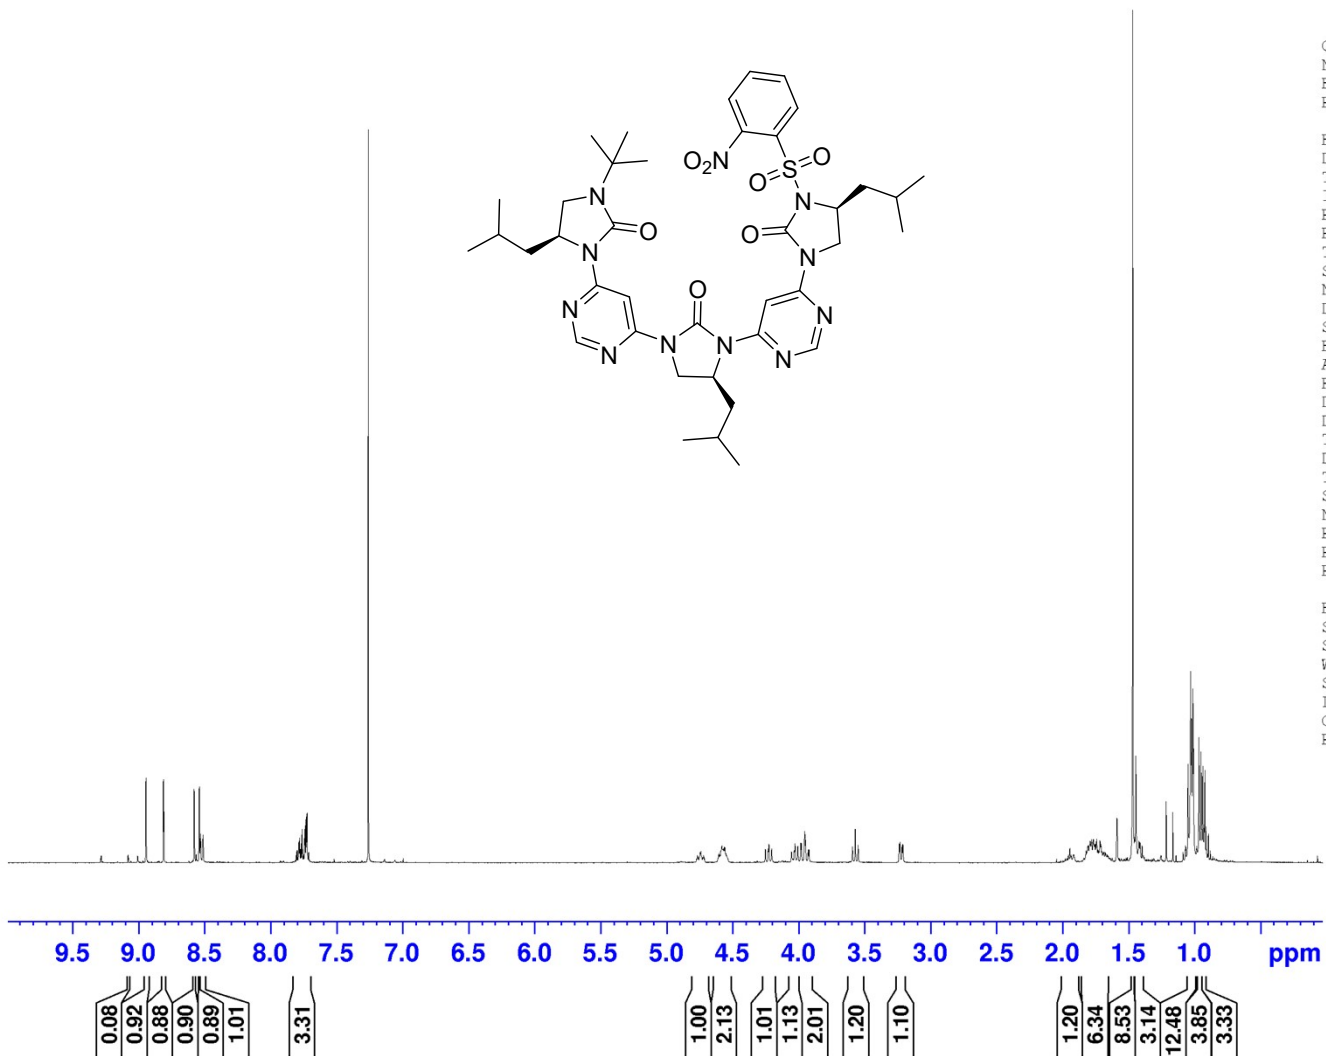

Current Data Parameters  
NAME TW-C-391-A  
EXPNO 10  
PROCNO 1

F2 - Acquisition Parameters  
Date\_ 20201111  
Time 17.14 h  
INSTRUM AVIII\_400  
PROBHD Z108618\_0146 (  
PULPROG zg30  
TD 65536  
SOLVENT CDCl3  
NS 16  
DS 2  
SWH 8223.685 Hz  
FIDRES 0.250967 Hz  
AQ 3.9845889 sec  
RG 256  
DW 60.800 usec  
DE 17.42 usec  
TE 300.0 K  
D1 1.00000000 sec  
TD0 1  
SFO1 400.1124708 MHz  
NUC1 1H  
P0 5.00 usec  
P1 15.00 usec  
PLW1 17.29199982 W

F2 - Processing parameters  
SI 32768  
SF 400.1100088 MHz  
WDW EM  
SSB 0  
LB 0.30 Hz  
GB 0  
PC 1.00



S29  
<sup>13</sup>C NMR  
 151 MHz  
 CDCl<sub>3</sub>

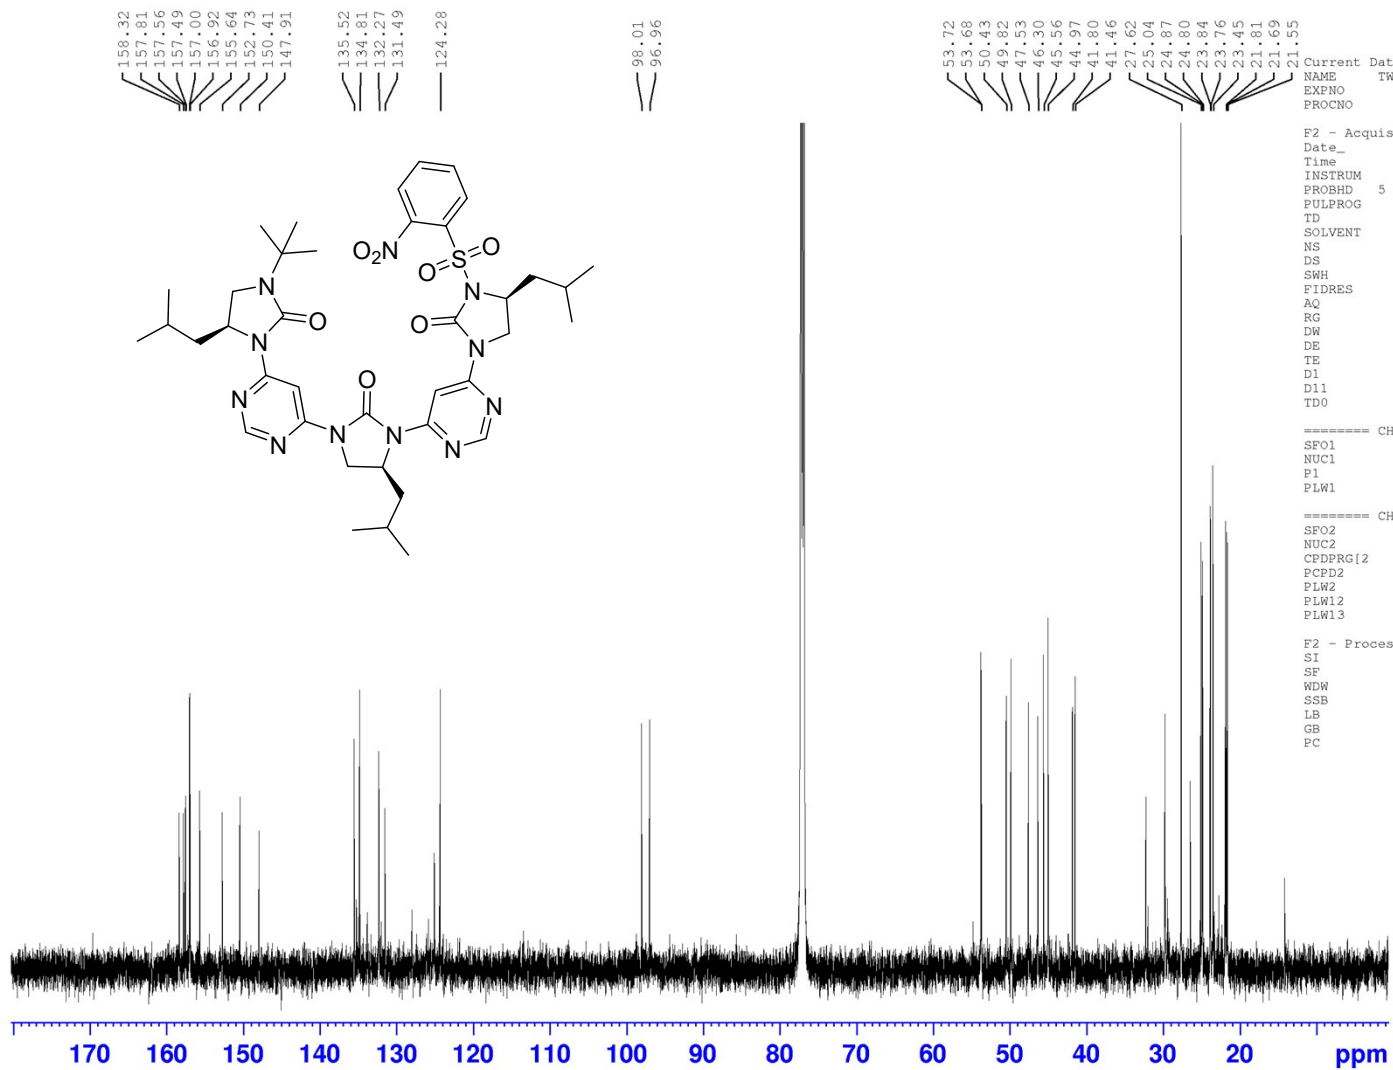

Current Data Parameters  
 NAME TW-B-266 TRITCelite 600 new  
 EXPNO 20  
 PROCNO 1

F2 - Acquisition Parameters  
 Date\_ 20200906  
 Time 17.42  
 INSTRUM spect  
 PROBHD 5 mm PABBO BB/  
 PULPROG zgpg30  
 TD 119044  
 SOLVENT CDCl3  
 NS 32000  
 DS 4  
 SWH 37500.000 Hz  
 FIDRES 0.315010 Hz  
 AQ 1.5872533 sec  
 RG 186.92  
 DW 13.333 usec  
 DE 7.73 usec  
 TE 300.0 K  
 D1 1.00000000 sec  
 D11 0.03000000 sec  
 TD0 1

===== CHANNEL f1 =====  
 SFO1 150.9194058 MHz  
 NUC1 13C  
 P1 11.80 usec  
 PLW1 85.00000000 W

===== CHANNEL f2 =====  
 SFO2 600.1324005 MHz  
 NUC2 1H  
 CPDPRG[2] waltz64  
 PCPD2 80.00 usec  
 PLW2 27.00000000 W  
 PLW12 0.43891999 W  
 PLW13 0.28090999 W

F2 - Processing parameters  
 SI 131072  
 SF 150.9028084 MHz  
 WDW EM  
 SSB 0  
 LB 1.00 Hz  
 GB 0  
 PC 1.40

S30  
1H NMR  
400 MHz  
CDCl<sub>3</sub>

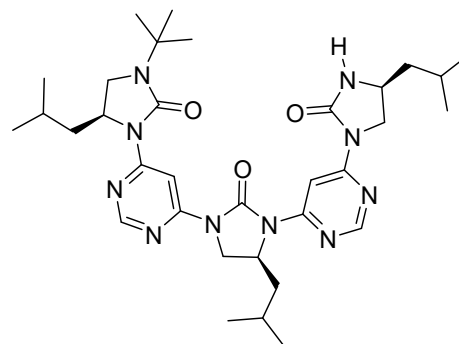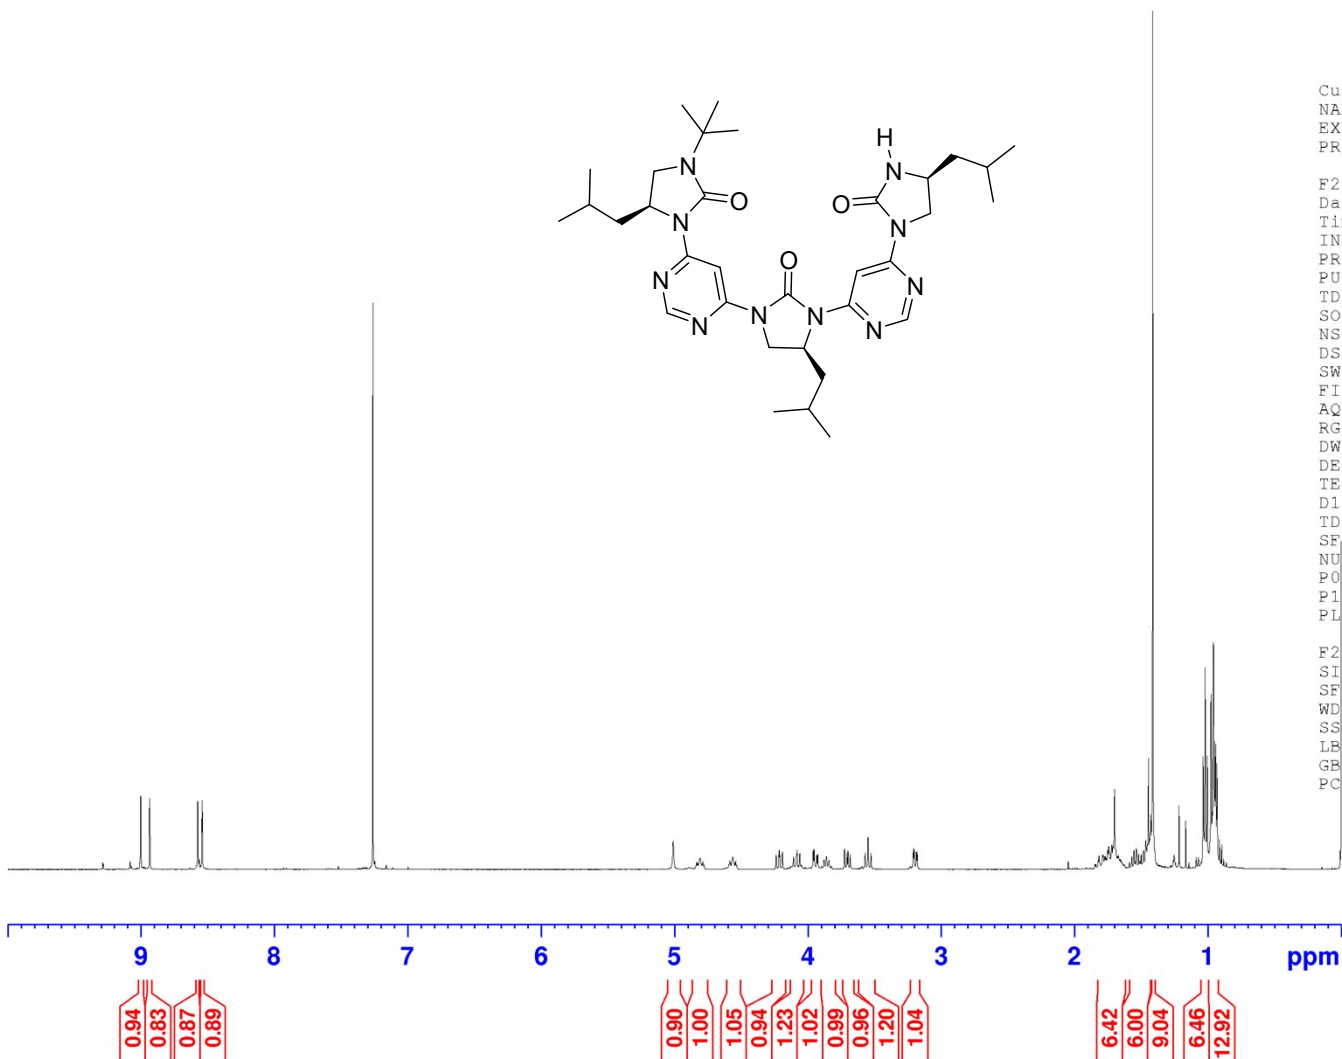

Current Data Parameters  
NAME TW-C-392  
EXPNO 10  
PROCNO 1

F2 - Acquisition Parameters  
Date\_ 20201116  
Time 9.43 h  
INSTRUM AVIII\_400  
PROBHD Z108618\_0146 ( )  
PULPROG zg30  
TD 65536  
SOLVENT CDC13  
NS 64  
DS 2  
SWH 8223.685 Hz  
FIDRES 0.250967 Hz  
AQ 3.9845889 sec  
RG 256  
DW 60.800 usec  
DE 17.42 usec  
TE 300.0 K  
D1 1.00000000 sec  
TD0 1  
SF01 400.1124708 MHz  
NUC1 1H  
P0 5.00 usec  
P1 15.00 usec  
PLW1 17.2919982 W

F2 - Processing parameters  
SI 32768  
SF 400.1100081 MHz  
WDW EM  
SSB 0  
LB 0.30 Hz  
GB 0  
PC 1.00

S30  
13C NMR  
101 MHz  
CDCl<sub>3</sub>

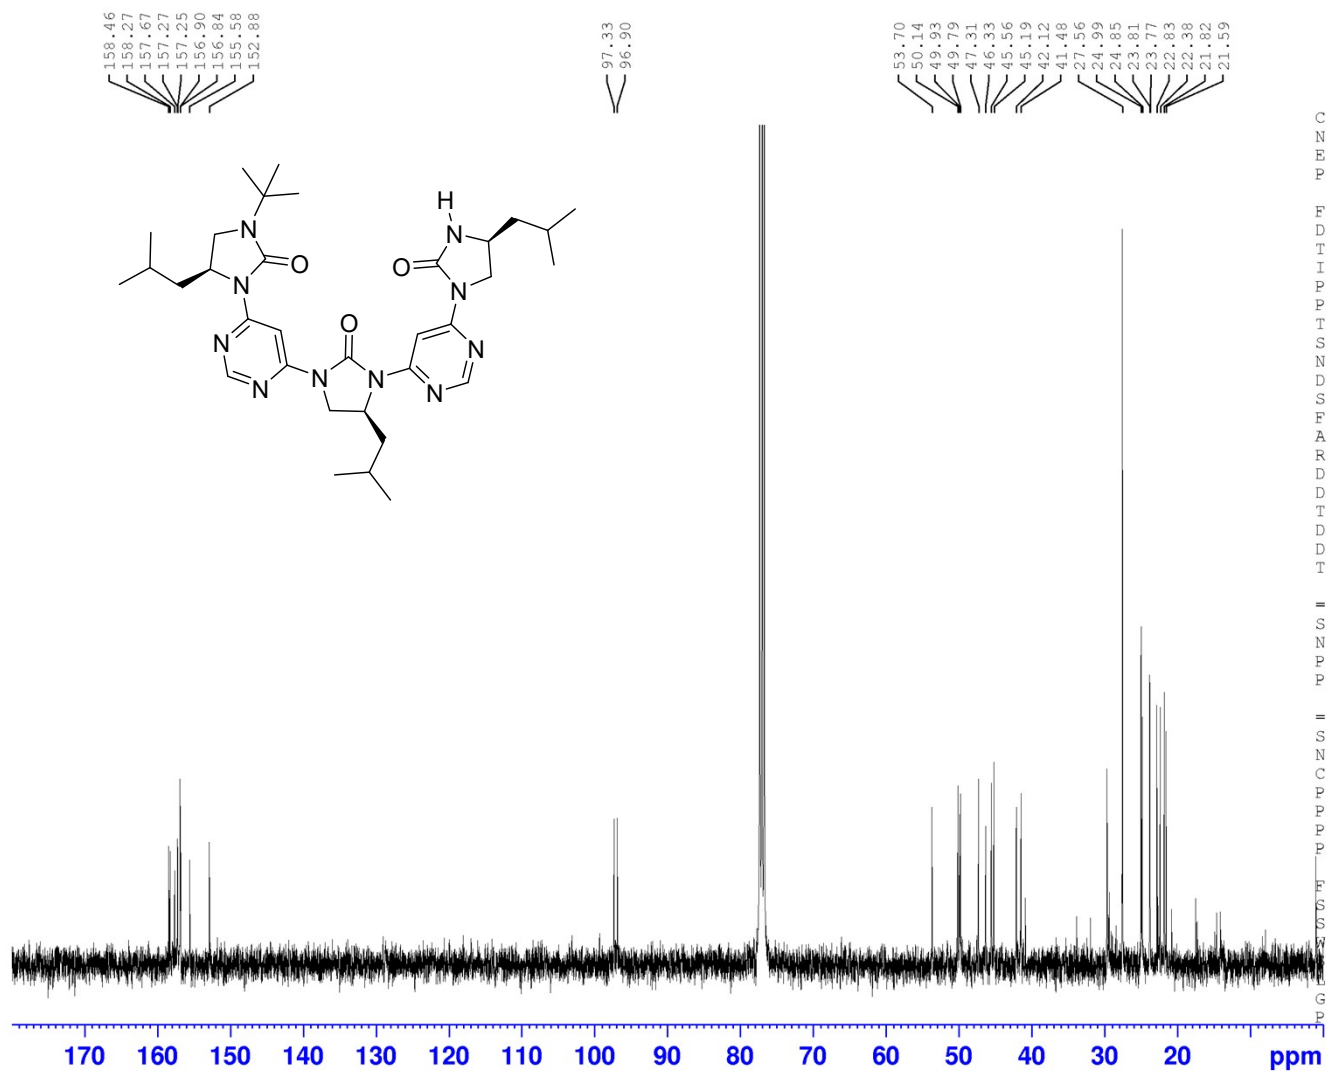

Current Data Parameters  
NAME TW-B-254-A FULL  
EXPNO 72  
PROCNO 1

F2 - Acquisition Parameters  
Date\_ 20190828  
Time 5.23  
INSTRUM spect  
PROBHD 5 mm PABBO BB/  
PULPROG zgpg30  
TD 65536  
SOLVENT CDCl3  
NS 1024  
DS 4  
SWH 24038.461 Hz  
FIDRES 0.366798 Hz  
AQ 1.3631488 sec  
RG 203  
DW 20.800 usec  
DE 6.50 usec  
TE 299.5 K  
D1 2.00000000 sec  
D11 0.03000000 sec  
TD0 1

===== CHANNEL f1 =====  
SFO1 100.5649900 MHz  
NUC1 13C  
P1 10.00 usec  
PLW1 44.46300125 W

===== CHANNEL f2 =====  
SFO2 399.9015996 MHz  
NUC2 1H  
CPDPRG[2] waltz16  
PCPD2 90.00 usec  
PLW2 7.59999990 W  
PLW12 0.20774999 W  
PLW13 0.16827001 W

F2 - Processing parameters  
SI 32768  
SF 100.5549350 MHz  
WDW EM  
SB 0  
LB 1.00 Hz  
GB 0  
PC 1.40

S31  
1H NMR  
400 MHz  
CDCl<sub>3</sub>

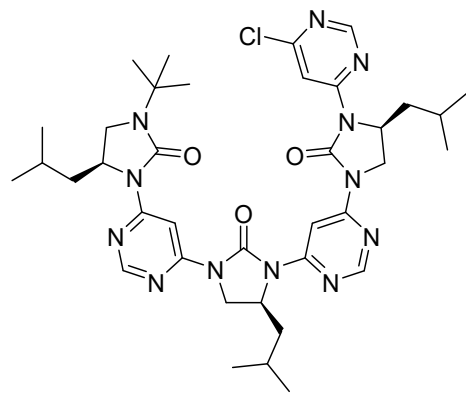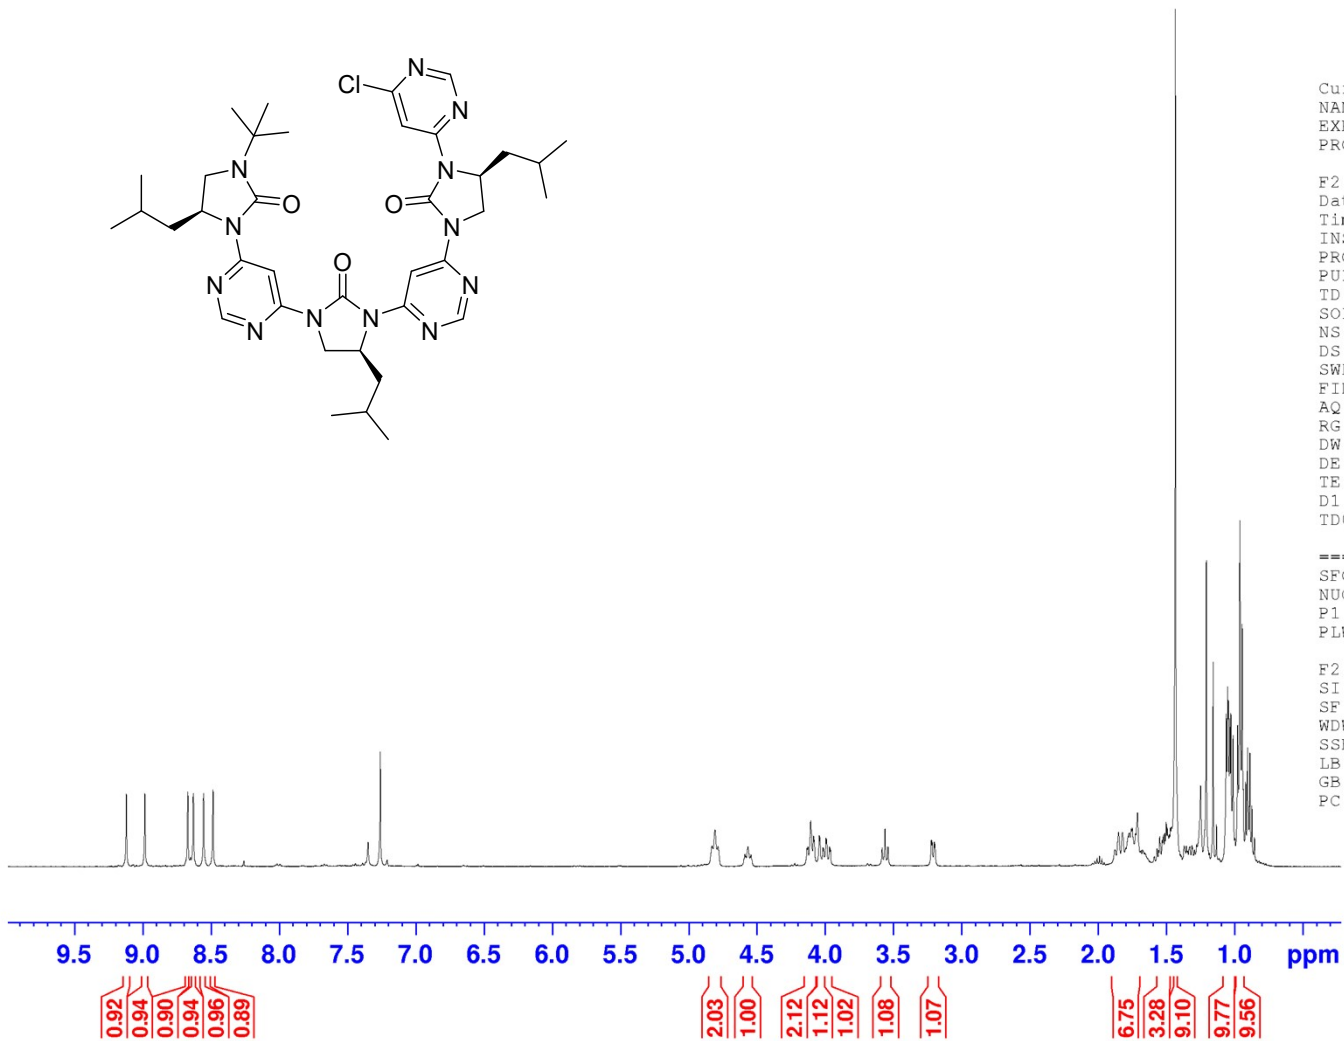

```
Current Data Parameters
NAME      TW-B-274-A
EXPNO     10
PROCNO    1

F2 - Acquisition Parameters
Date_     20190828
Time      19.06
INSTRUM   spect
PROBHD    5 mm PABBO BB/
PULPROG   zg30
TD        131072
SOLVENT   CDCl3
NS        16
DS        0
SWH       12019.230 Hz
FIDRES    0.091699 Hz
AQ        5.4525952 sec
RG        71.8
DW        41.600 usec
DE        9.85 usec
TE        298.4 K
D1        0.10000000 sec
TD0       1

----- CHANNEL f1 -----
SF01      399.9024695 MHz
NUC1      1H
P1        14.88 usec
PLW1      7.59999990 W

F2 - Processing parameters
SI        131072
SF        399.9000096 MHz
WDW       EM
SSB       0
LB        0.10 Hz
GB        0
PC        1.00
```

S31  
<sup>13</sup>C NMR  
101 MHz  
CDCl<sub>3</sub>

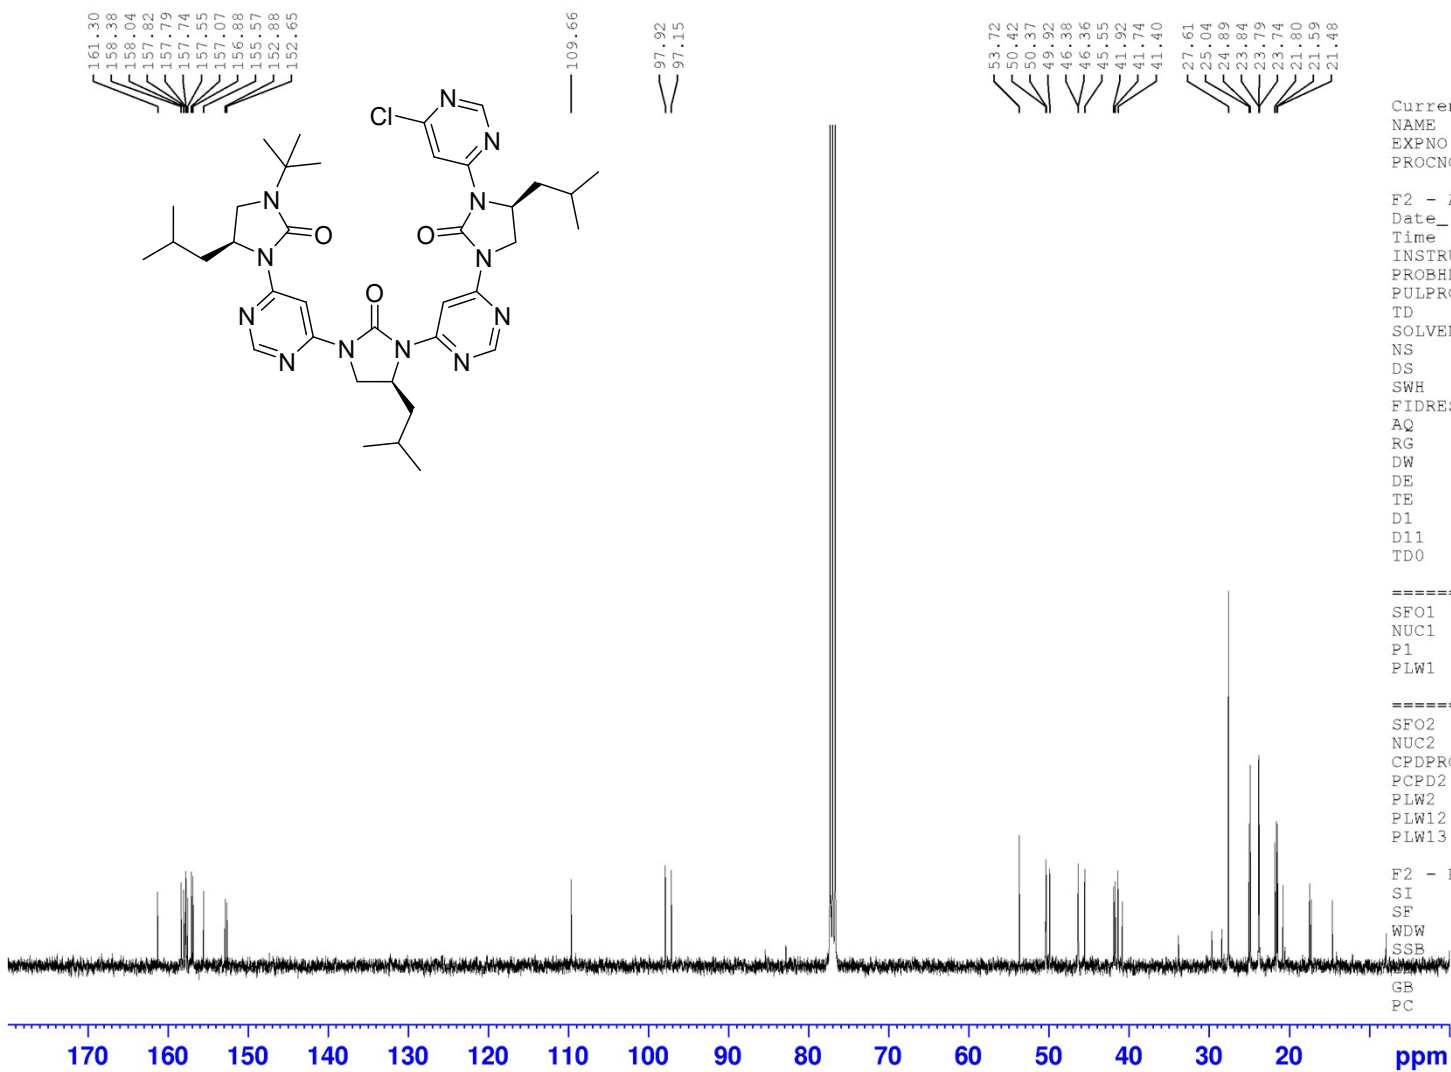

Current Data Parameters  
NAME TW-B-274-A  
EXPNO 11  
PROCNO 1

F2 - Acquisition Parameters  
Date\_ 20190828  
Time 20.06  
INSTRUM spect  
PROBHD 5 mm PABBO BB/  
PULPROG zgpg30  
TD 65536  
SOLVENT CDCl3  
NS 1024  
DS 4  
SWH 24038.461 Hz  
FIDRES 0.366798 Hz  
AQ 1.3631488 sec  
RG 203  
DW 20.800 usec  
DE 6.50 usec  
TE 299.5 K  
D1 2.00000000 sec  
D11 0.03000000 sec  
TD0 1

==== CHANNEL f1 =====  
SFO1 100.5649900 MHz  
NUC1 13C  
P1 10.00 usec  
PLW1 44.46300125 W

==== CHANNEL f2 =====  
SFO2 399.9015996 MHz  
NUC2 1H  
CPDPRG[2] waltz16  
PCPD2 90.00 usec  
PLW2 7.59999990 W  
PLW12 0.20774999 W  
PLW13 0.16827001 W

F2 - Processing parameters  
SI 32768  
SF 100.5549350 MHz  
WDW EM  
SSB 0  
GB 1.00 Hz  
PC 0  
1.40

Current Data Parameters  
NAME TW-B-278-A TRIT  
EXPNO 10  
PROCNO 1

F2 - Acquisition Parameters  
Date\_ 20190923  
Time 19.50  
INSTRUM spect  
PROBHD 5 mm PABBO BB/  
PULPROG zg30  
TD 65536  
SOLVENT CDC13  
NS 16  
DS 2  
SWH 12019.230 Hz  
FIDRES 0.183399 Hz  
AQ 2.7262976 sec  
RG 83.95  
DW 41.600 usec  
DE 6.50 usec  
TE 300.0 K  
D1 1.0000000 sec  
TDO 1

----- CHANNEL f1 -----  
SF01 600.1337060 MHz  
NUC1 1H  
P1 10.00 usec  
PLW1 26.60000038 W

F2 - Processing parameters  
SI 65536  
SF 600.1300150 MHz  
WDW EM  
SSB 0  
LB 0.30 Hz  
GB 0  
PC 1.00

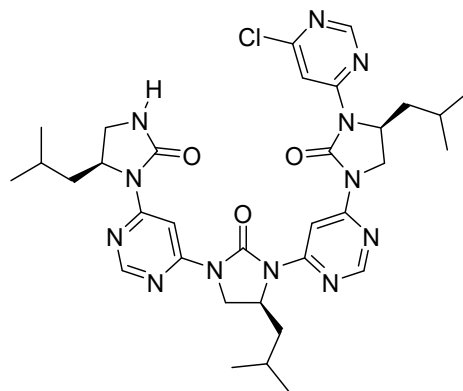

**4a**  
<sup>1</sup>H NMR  
600 MHz  
CDCl<sub>3</sub>

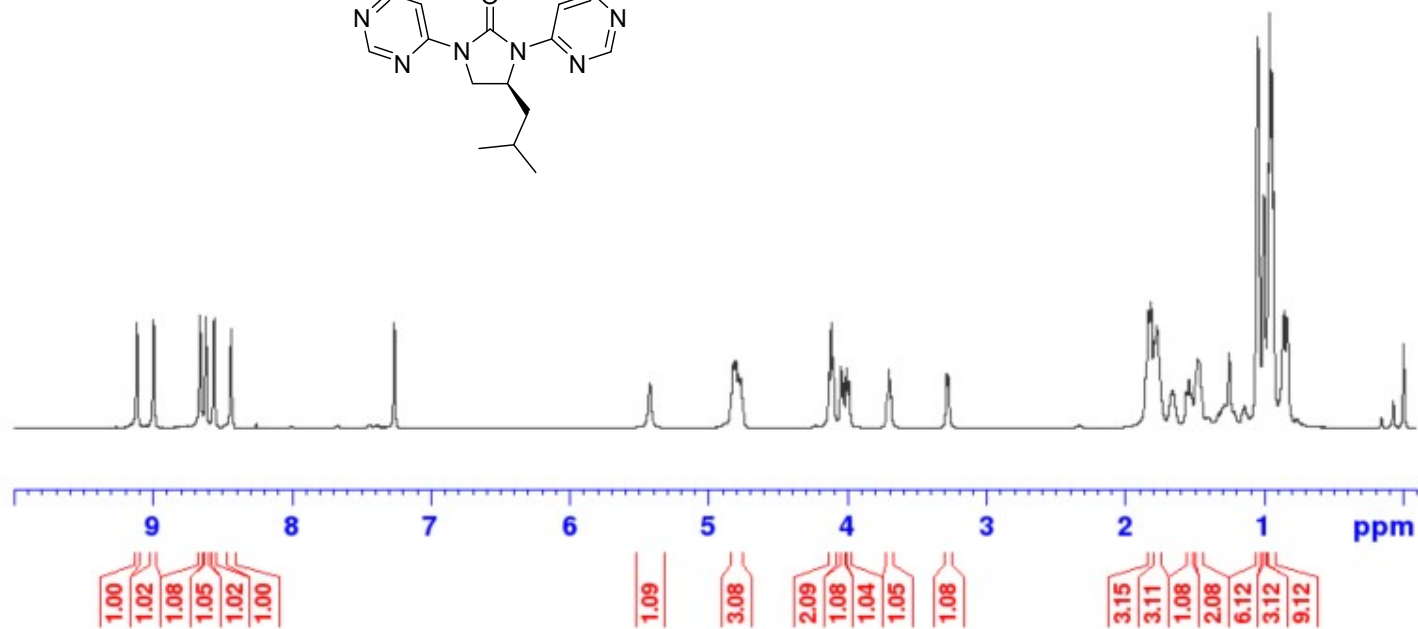

4a  
<sup>13</sup>C NMR  
 151 MHz  
 CDCl<sub>3</sub>

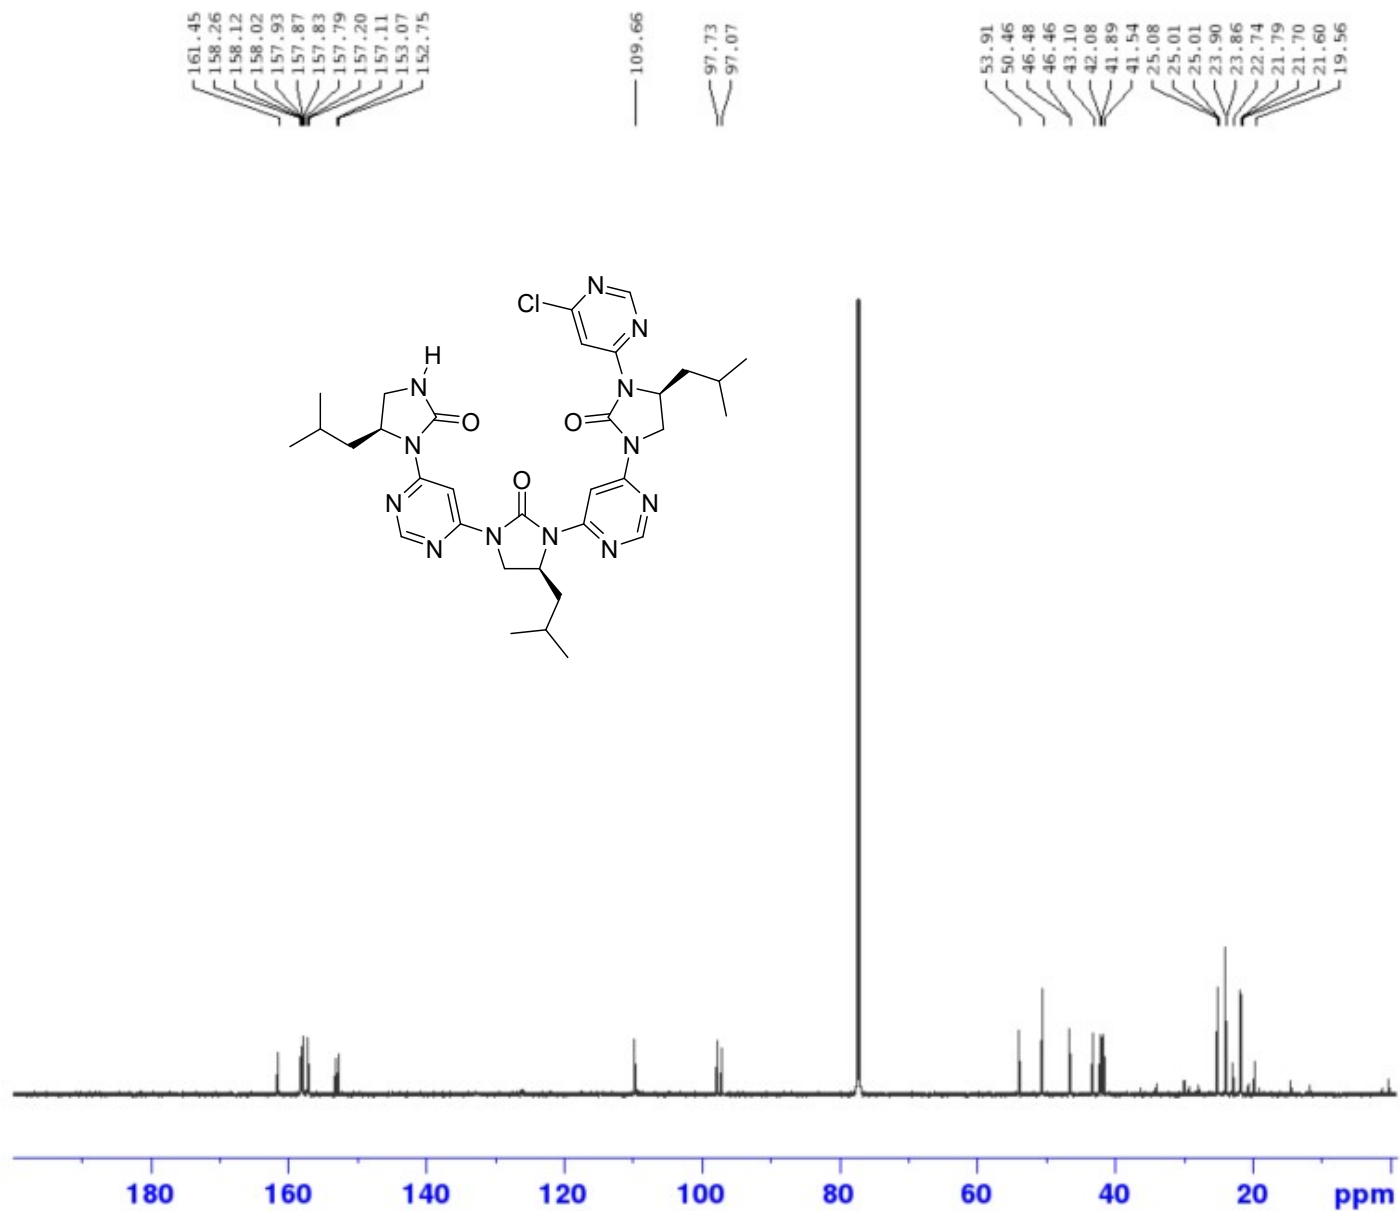

Current Data Parameters  
 NAME TW-B-278-A TRIT  
 EXPNO 11  
 PROCNO 1

F2 - Acquisition Parameters  
 Date\_ 20190923  
 Time 21.32  
 INSTRUM spect  
 PROBHD 5 mm PABBO BB/  
 PULPROG zgpg30  
 TD 65536  
 SOLVENT CDCl3  
 NS 2048  
 DS 4  
 SWH 36057.691 Hz  
 FIDRES 0.550197 Hz  
 AQ 0.9087659 sec  
 RG 186.92  
 DW 13.867 usec  
 DE 6.50 usec  
 TE 300.0 K  
 D1 2.0000000 sec  
 D11 0.03000000 sec  
 TDO 1

----- CHANNEL f1 -----  
 SFO1 150.9178981 MHz  
 NUC1 13C  
 P1 11.80 usec  
 PLW1 85.00000000 W

----- CHANNEL f2 -----  
 SFO2 600.1324005 MHz  
 NUC2 1H  
 CPDPRG[2] waltz16  
 PCPD2 80.00 usec  
 PLW2 27.00000000 W  
 PLW12 0.43891999 W  
 PLW13 0.28090999 W

F2 - Processing parameters  
 SI 32768  
 SF 150.9027895 MHz  
 WDW EM  
 SSB 0  
 LB 1.00 Hz  
 GB 0  
 PC 1.40

Current Data Parameters  
NAME TW-B-267-A 600  
EXPNO 140  
PROCNO 1

F2 - Acquisition Parameters  
Date\_ 20190901  
Time 3.46  
INSTRUM spect  
PROBHD 5 mm PABBO BB/  
PULPROG zg30  
TD 65536  
SOLVENT CDC13  
NS 16  
DS 2  
SWH 12019.230 Hz  
FIDRES 0.183399 Hz  
AQ 2.7262976 sec  
RG 105.21  
DW 41.600 usec  
DE 6.50 usec  
TE 300.0 K  
D1 1.00000000 sec  
TDO 1

----- CHANNEL f1 -----  
SF01 600.1337060 MHz  
NUC1 1H  
P1 10.00 usec  
PLW1 26.60000038 W

F2 - Processing parameters  
SI 65536  
SF 600.1300150 MHz  
WDW EM  
SSB 0  
LB 0.30 Hz  
GB 0  
PC 1.00

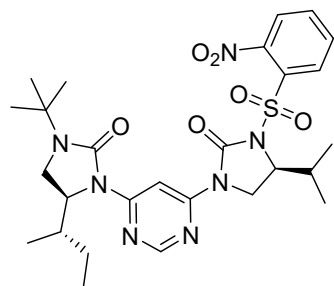

S32  
1H NMR  
600 MHz  
CDCl<sub>3</sub>

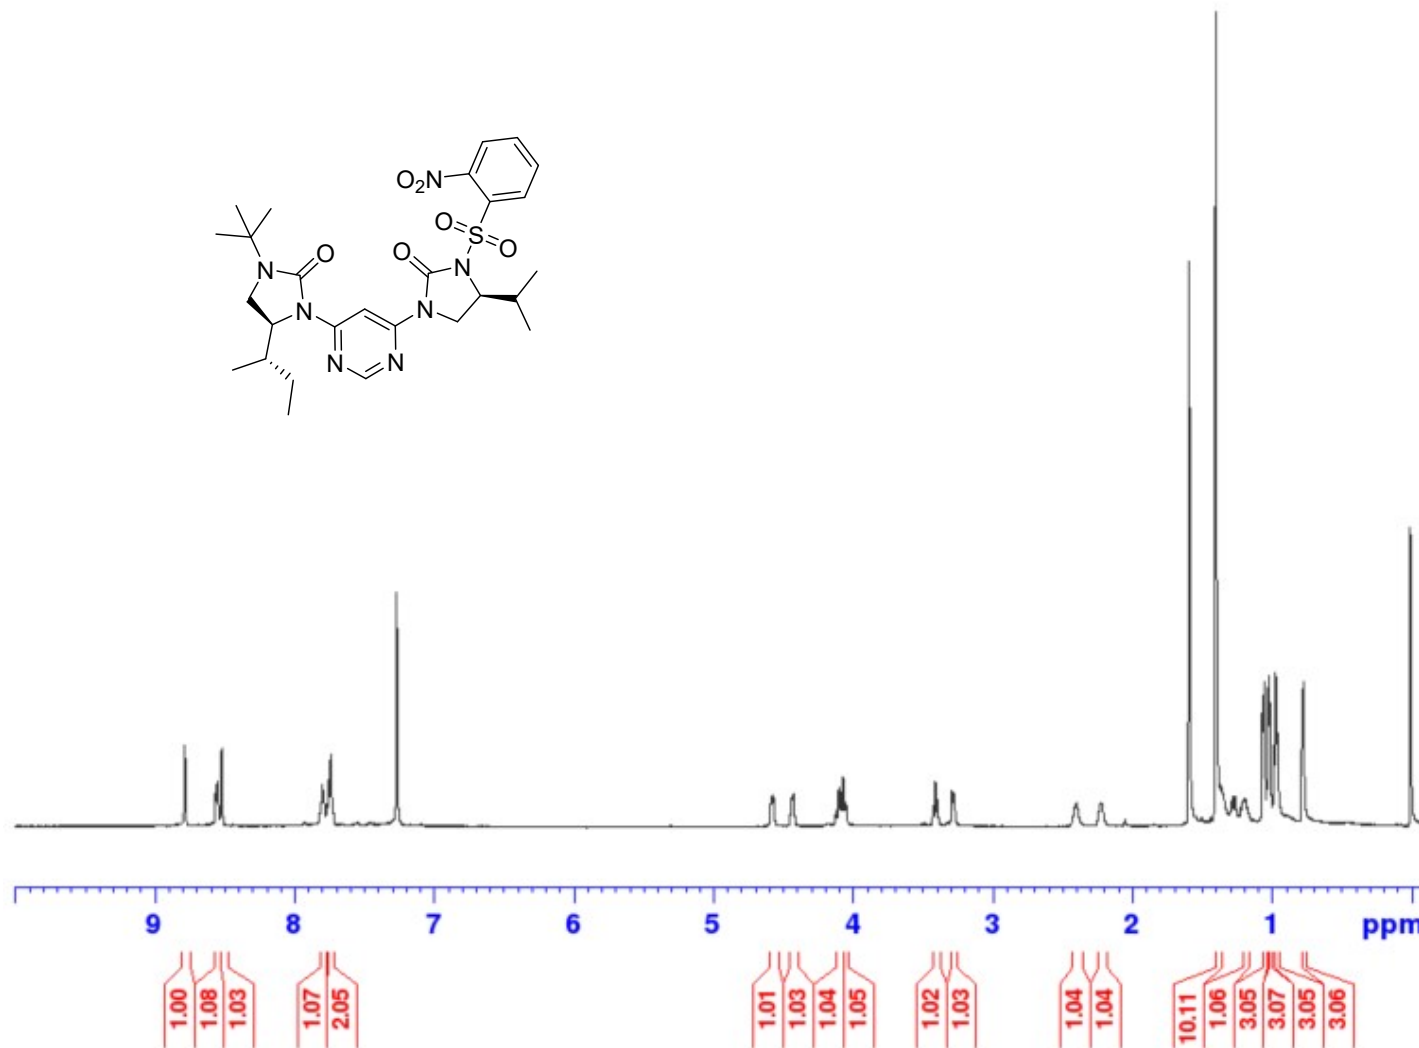



Current Data Parameters

NAME TW-B-267-A 600  
 EXPNO 10  
 PROCNO 1

F2 - Acquisition Parameters

Date\_ 20190907  
 Time 14.13  
 INSTRUM spect  
 PROBHD 5 mm PABBO BB/  
 PULPROG zgpg30  
 TD 65536  
 SOLVENT CDC13  
 NS 2048  
 DS 4  
 SWH 36057.691 Hz  
 FIDRES 0.550197 Hz  
 AQ 0.9087659 sec  
 RG 186.92  
 DW 13.867 usec  
 DE 6.50 usec  
 TE 300.0 K  
 D1 2.00000000 sec  
 D11 0.03000000 sec  
 TDO 1

===== CHANNEL f1 =====

SFO1 150.9178981 MHz  
 NUC1 13C  
 P1 11.80 usec  
 PLW1 85.00000000 W

===== CHANNEL f2 =====

SFO2 600.1324005 MHz  
 NUC2 1H  
 CPDPRG[2] waltz16  
 PCPD2 80.00 usec  
 PLW2 27.00000000 W  
 PLW12 0.43891999 W  
 PLW13 0.28090999 W

F2 - Processing parameters

SI 32768  
 SF 150.9028084 MHz  
 WDW EM  
 SSB 0  
 LB 1.00 Hz  
 GB 0  
 PC 1.40

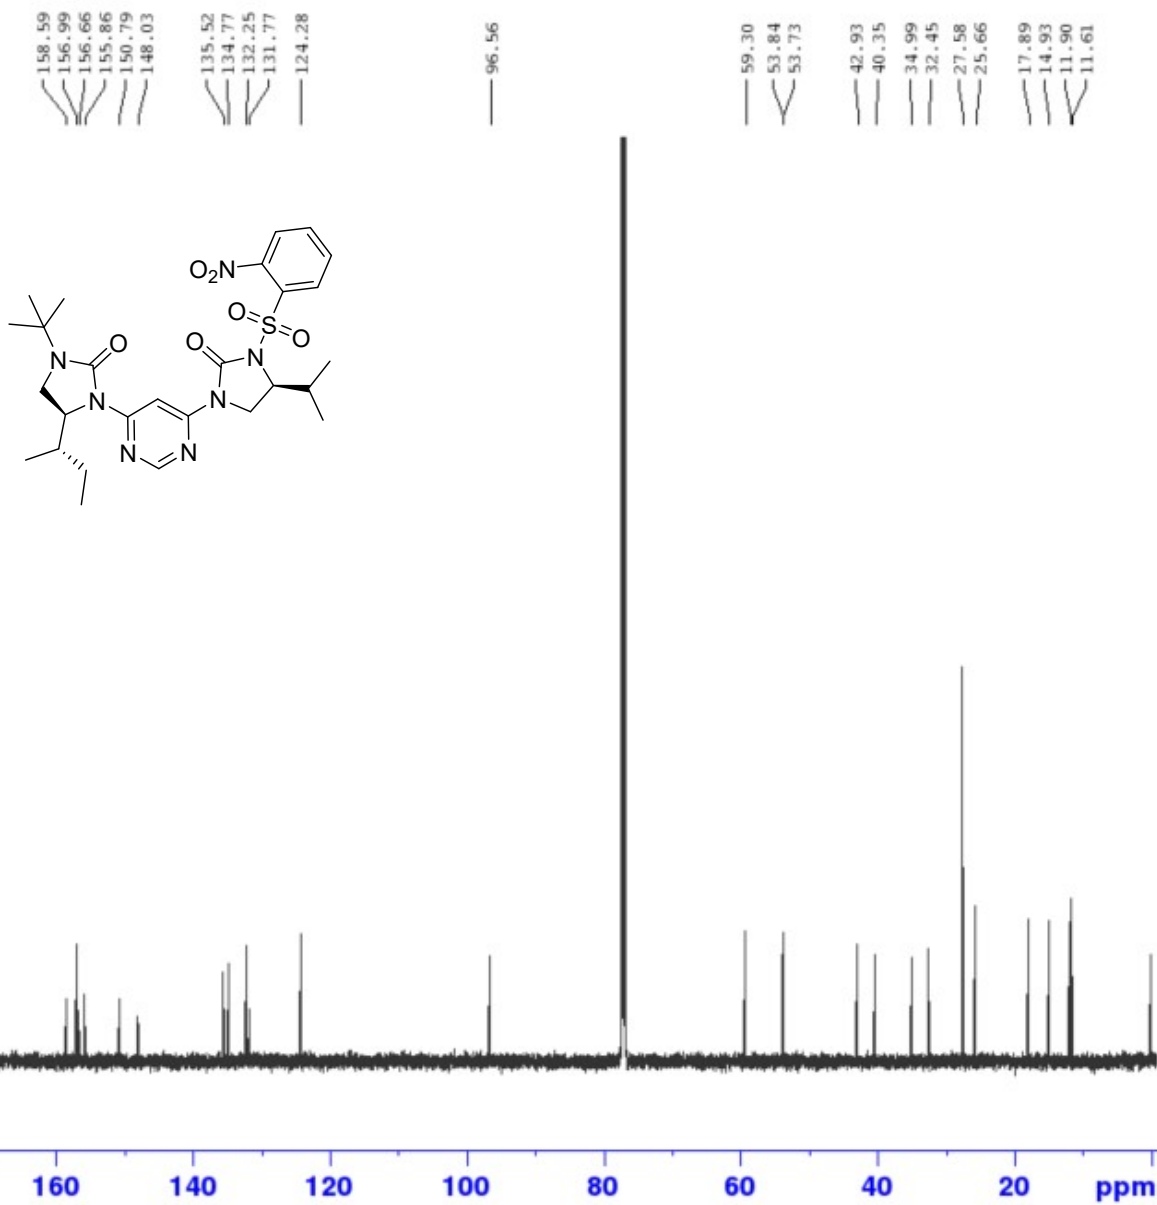

S32

<sup>13</sup>C NMR

151 MHz

CDCl<sub>3</sub>

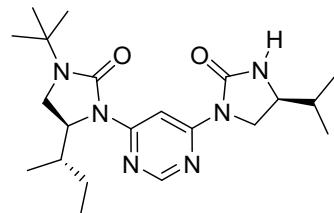

Current Data Parameters  
 NAME TW-B-271-A 600  
 EXPNO 190  
 PROCNO 1

F2 - Acquisition Parameters  
 Date\_ 20190901  
 Time 17.24  
 INSTRUM spect  
 PROBHD 5 mm PABBO BB/  
 PULPROG zg30  
 TD 65536  
 SOLVENT CDC13  
 NS 16  
 DS 2  
 SWH 12019.230 Hz  
 FIDRES 0.183399 Hz  
 AQ 2.7262976 sec  
 RG 148.05  
 DW 41.600 usec  
 DE 6.50 usec  
 TE 300.0 K  
 D1 1.00000000 sec  
 TDO 1

----- CHANNEL f1 -----  
 SFO1 600.1337060 MHz  
 NUC1 1H  
 P1 10.00 usec  
 PLW1 26.60000038 W

F2 - Processing parameters  
 SI 65536  
 SF 600.1300153 MHz  
 WDW EM  
 SSB 0  
 LB 0.30 Hz  
 GB 0  
 PC 1.00

S33  
<sup>1</sup>H NMR  
 600 MHz  
 CDCl<sub>3</sub>

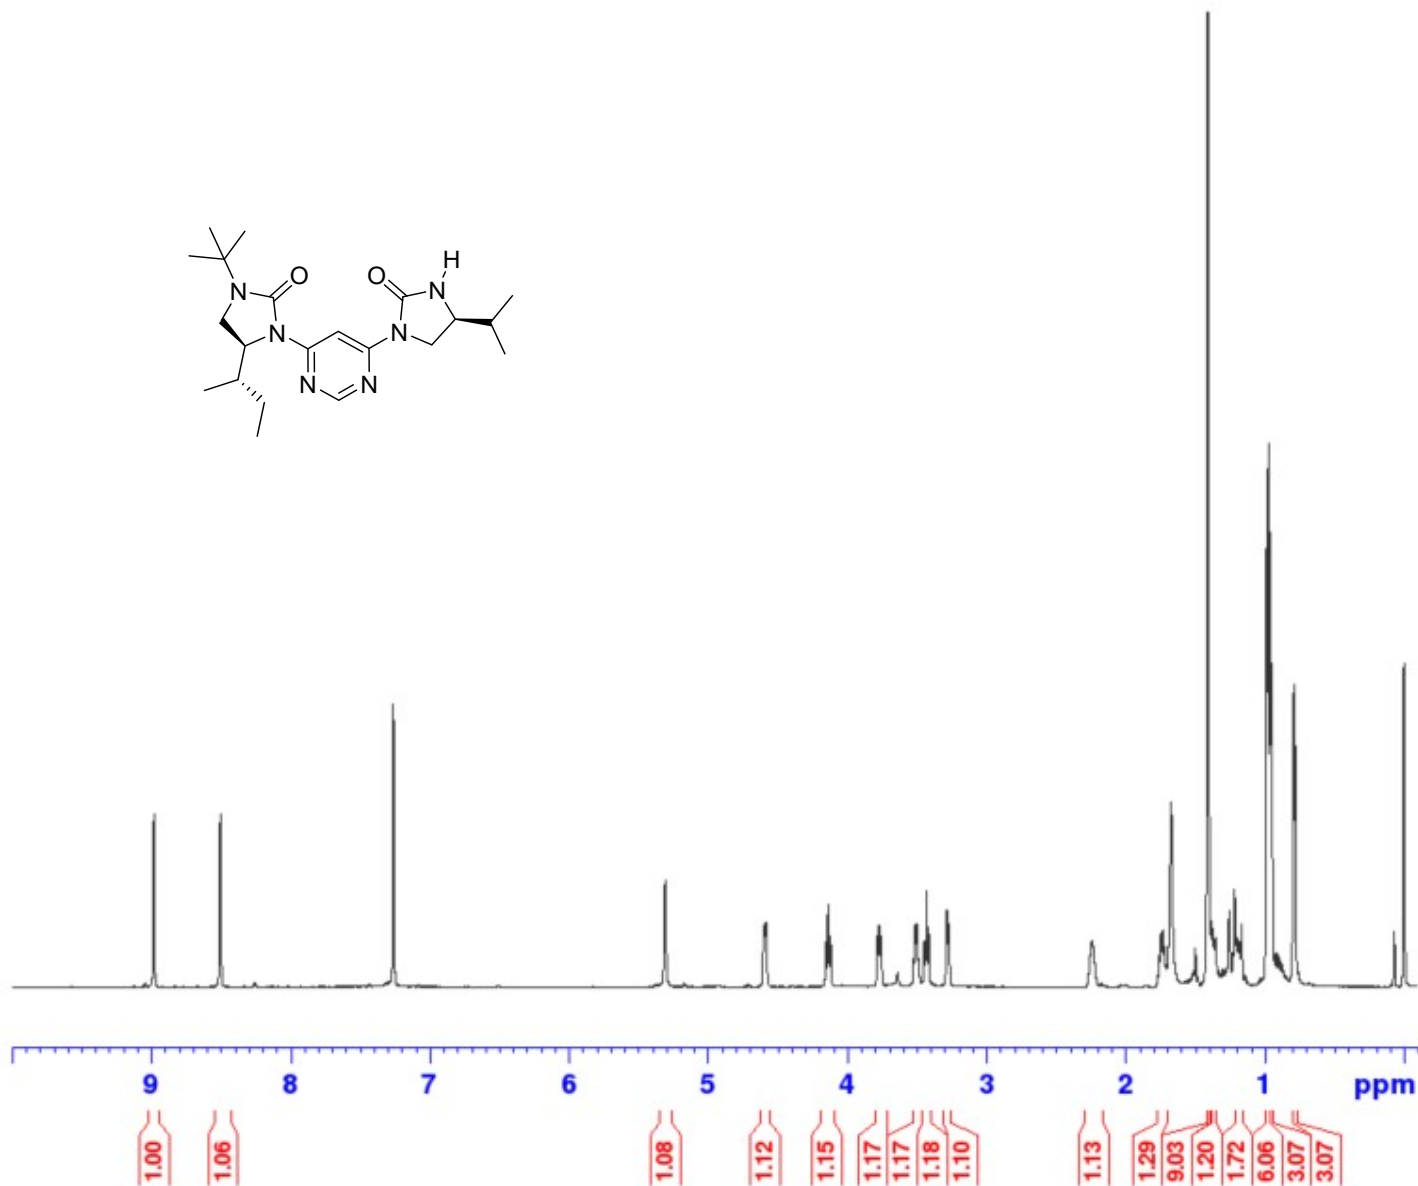

S33  
<sup>13</sup>C NMR  
151 MHz  
CDCl<sub>3</sub>

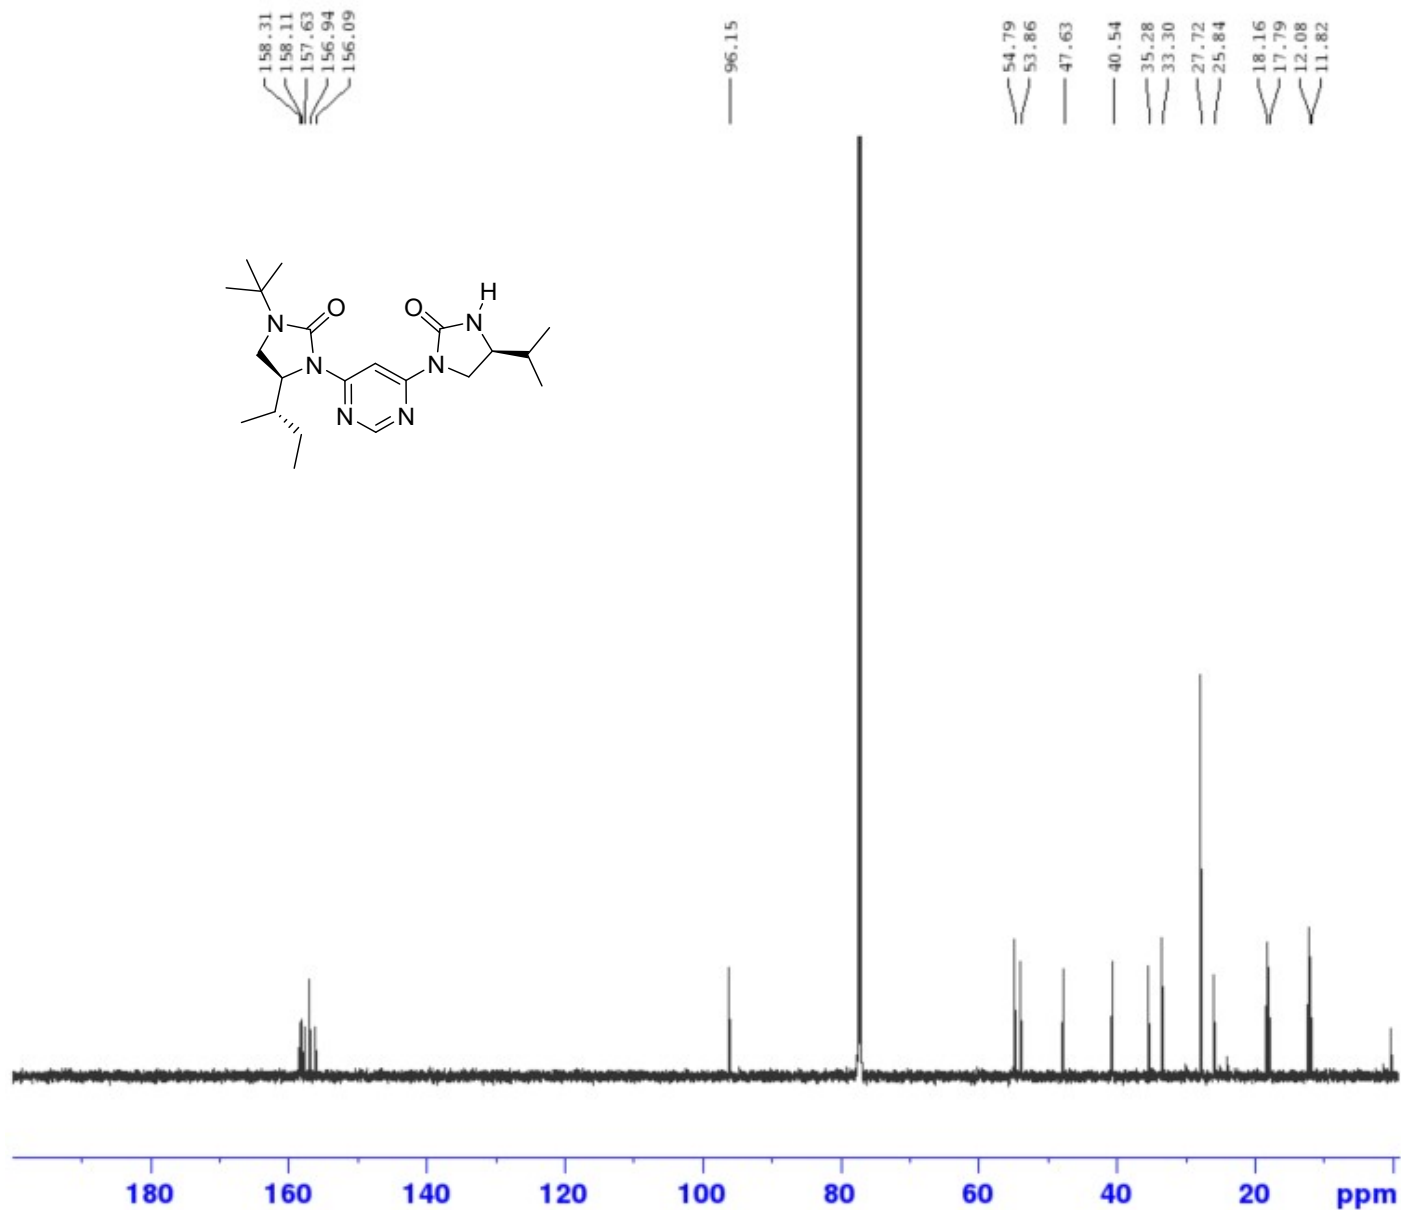

Current Data Parameters  
NAME TW-B-271-A 600  
EXPNO 192  
PROCNO 1

F2 - Acquisition Parameters  
Date\_ 20190901  
Time 19.06  
INSTRUM spect  
PROBHD 5 mm PABBO BB/  
PULPROG zgpg30  
TD 65536  
SOLVENT CDC13  
NS 2048  
DS 4  
SWH 36057.691 Hz  
FIDRES 0.550197 Hz  
AQ 0.9087659 sec  
RG 186.92  
DW 13.867 usec  
DE 6.50 usec  
TE 300.0 K  
D1 2.00000000 sec  
D11 0.03000000 sec  
TDO 1

===== CHANNEL f1 =====  
SFO1 150.9178981 MHz  
NUC1 13C  
P1 11.80 usec  
PLW1 85.00000000 W

===== CHANNEL f2 =====  
SFO2 600.1324005 MHz  
NUC2 1H  
CPDPRG[2] waltz16  
PCPD2 80.00 usec  
PLW2 27.00000000 W  
PLW12 0.43891999 W  
PLW13 0.28090999 W

F2 - Processing parameters  
SI 32768  
SF 150.9027871 MHz  
WDW EM  
SSB 0  
LB 1.00 Hz  
GB 0  
PC 1.40

**2e**  
<sup>1</sup>H NMR  
600 MHz  
CDCl<sub>3</sub>

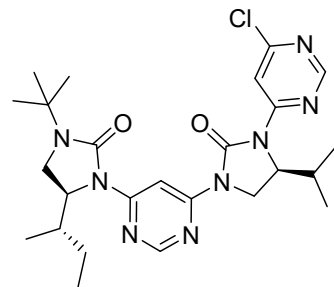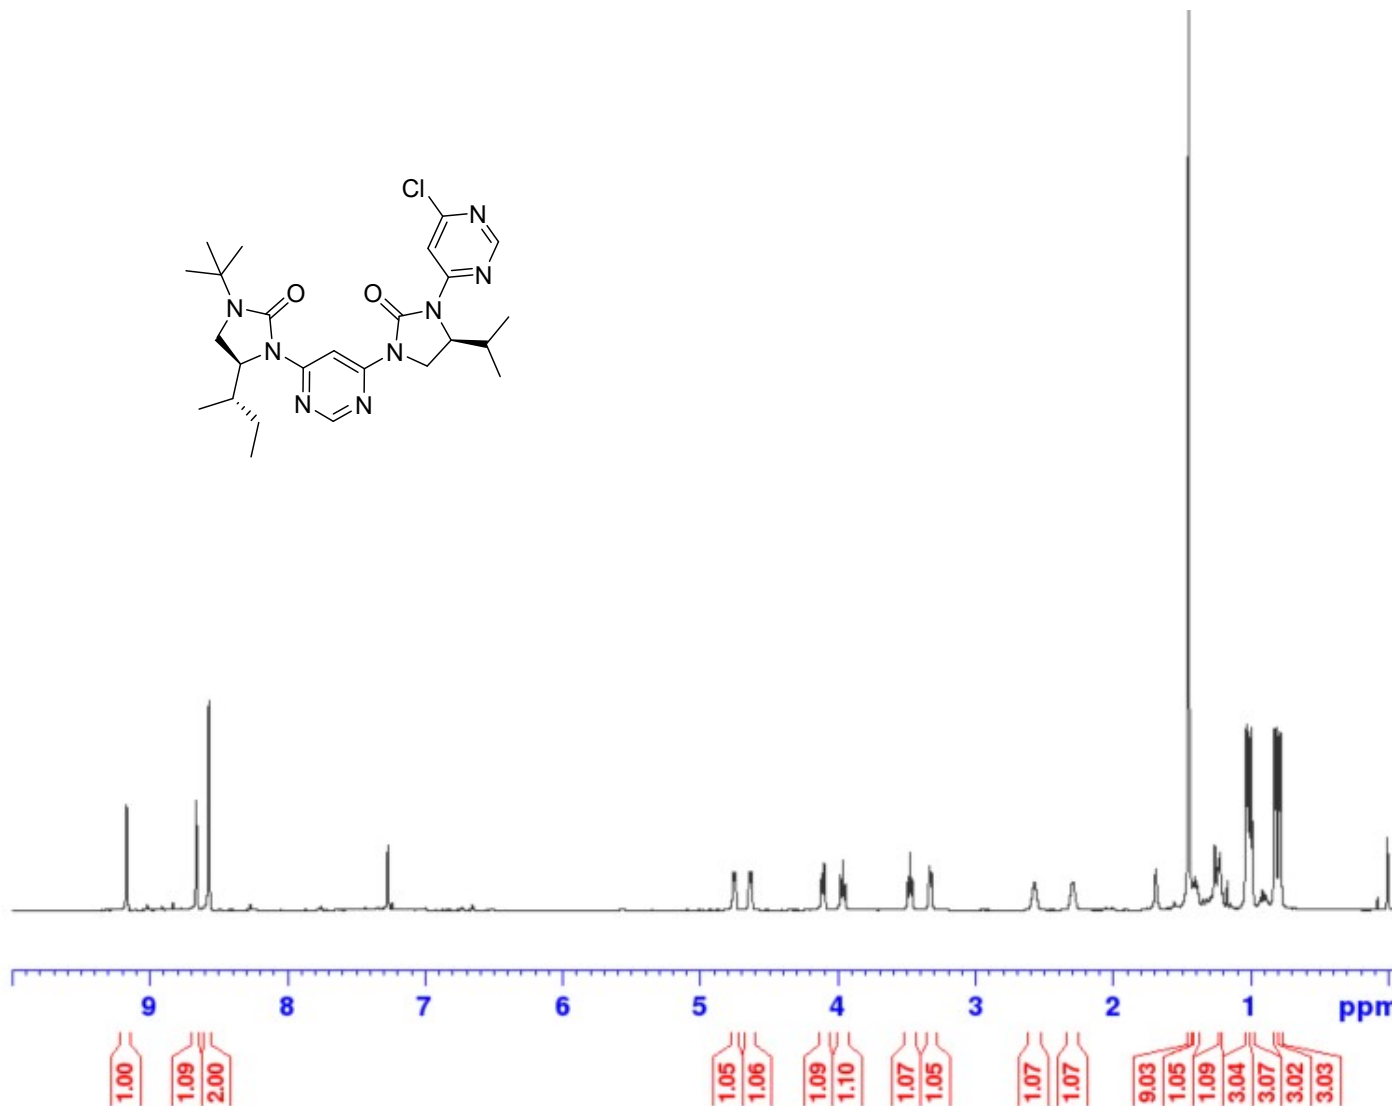

Current Data Parameters  
NAME TW-B-276-A 600  
EXPNO 10  
PROCNO 1

F2 - Acquisition Parameters  
Date\_ 20190903  
Time 8.03  
INSTRUM spect  
PROBHD 5 mm PABBO BB/  
PULPROG zg30  
TD 65536  
SOLVENT CDCl3  
NS 64  
DS 2  
SWH 12019.230 Hz  
FIDRES 0.183399 Hz  
AQ 2.7262976 sec  
RG 83.95  
DW 41.600 usec  
DE 6.50 usec  
TE 300.0 K  
D1 1.00000000 sec  
TDO 1

----- CHANNEL f1 -----  
SFO1 600.1337060 MHz  
NUC1 1H  
P1 10.00 usec  
PLW1 26.60000038 W

F2 - Processing parameters  
SI 65536  
SF 600.1300099 MHz  
WDW EM  
SSB 0  
LB 0.30 Hz  
GB 0  
PC 1.00

**2e**  
<sup>13</sup>C NMR  
 151 MHz  
 CDCl<sub>3</sub>

161.51  
 158.71  
 158.38  
 157.81  
 157.10  
 157.06  
 156.07  
 153.29

109.86

96.56

55.63  
 54.05  
 53.92

41.36  
 40.54

35.21

28.26  
 27.76

25.83

18.16

14.11

12.06

11.79

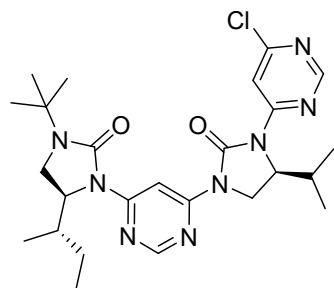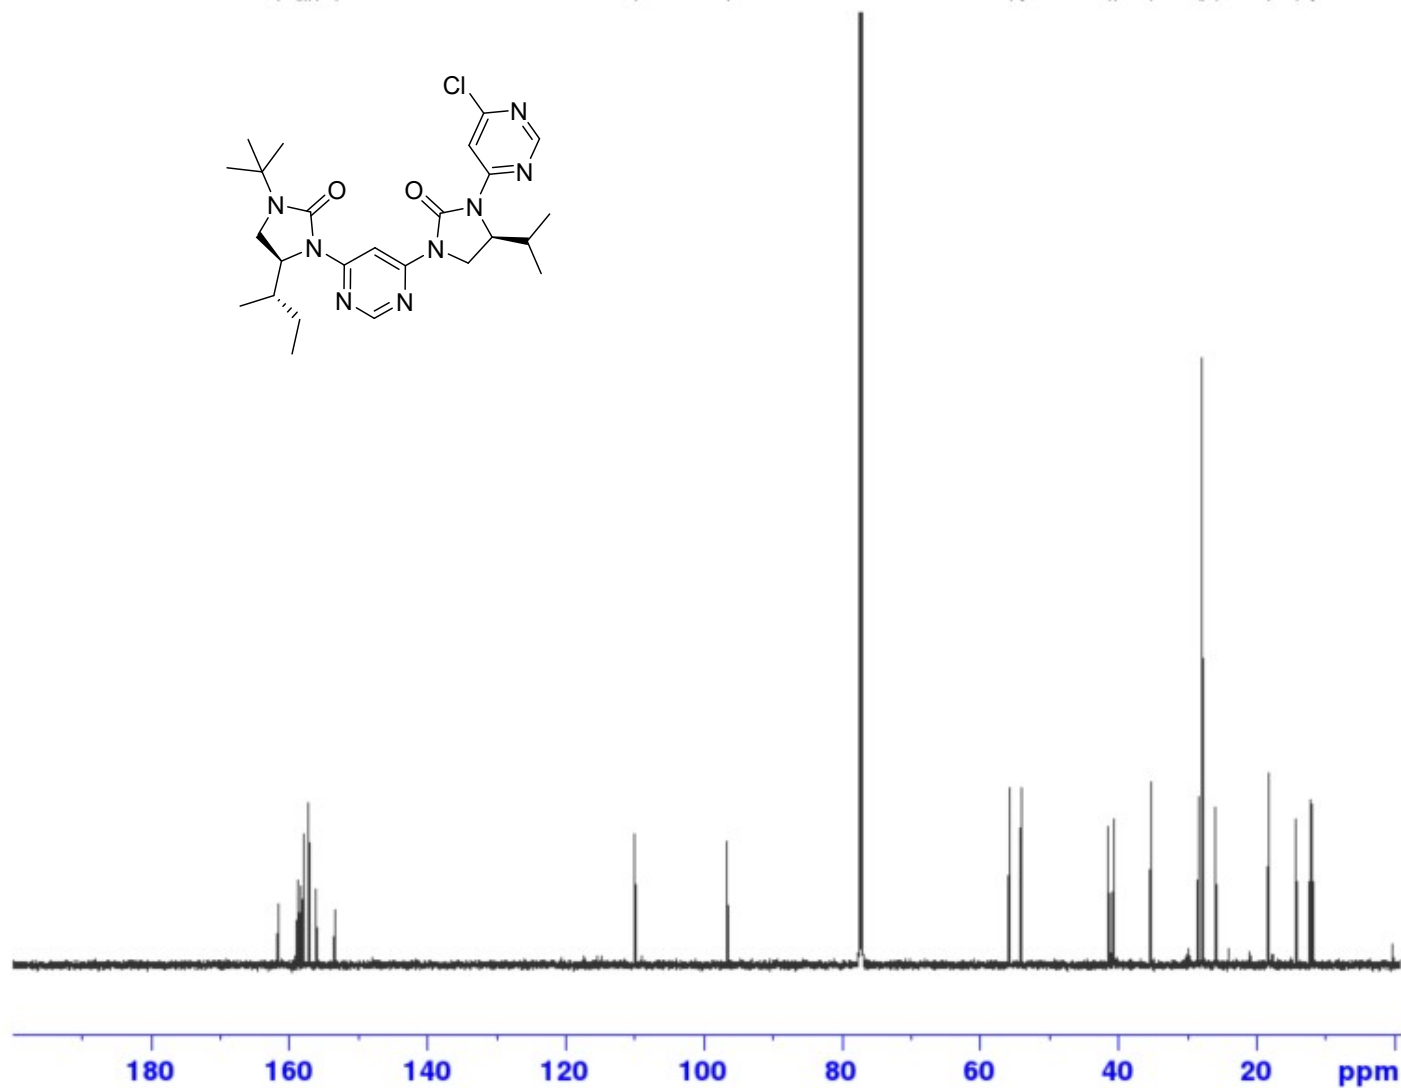

```

Current Data Parameters
NAME      Tw-B-276-A 600
EXPNO     11
PROCNO    1

F2 - Acquisition Parameters
Date_     20190903
Time      8.55
INSTRUM   spect
PROBHD    5 mm PABBO BB/
PULPROG   zgpg30
TD         65536
SOLVENT   CDC13
NS         1024
DS         4
SWH        36057.691 Hz
FIDRES     0.550197 Hz
AQ         0.9087659 sec
RG         186.92
DW         13.867 usec
DE         6.50 usec
TE         300.0 K
D1         2.00000000 sec
D11        0.03000000 sec
TDO        1

----- CHANNEL f1 -----
SFO1      150.9178981 MHz
NUC1       13C
P1         11.80 usec
PLW1       85.00000000 W

----- CHANNEL f2 -----
SFO2      600.1324005 MHz
NUC2       1H
CPDPRG[2] waltz16
PCPD2      80.00 usec
PLW2       27.00000000 W
PLW12      0.43891999 W
PLW13      0.28090999 W

F2 - Processing parameters
SI         32768
SF         150.9027891 MHz
WDW        EM
SSB        0
LB         1.00 Hz
GB         0
PC         1.40
  
```

Current Data Parameters  
 NAME TW-B-280-A  
 EXPNO 10  
 PROCNO 1

F2 - Acquisition Parameters  
 Date\_ 20190926  
 Time 15.22  
 INSTRUM spect  
 PROBHD 5 mm PABBO BB/  
 PULPROG zg30  
 TD 65536  
 SOLVENT CDC13  
 NS 16  
 DS 2  
 SWH 12019.230 Hz  
 FIDRES 0.183399 Hz  
 AQ 2.7262976 sec  
 RG 83.95  
 DW 41.600 usec  
 DE 6.50 usec  
 TE 300.0 K  
 D1 1.00000000 sec  
 TDO 1

----- CHANNEL f1 -----  
 SFO1 600.1337060 MHz  
 NUC1 1H  
 P1 10.00 usec  
 PLW1 26.60000038 W

F2 - Processing parameters  
 SI 65536  
 SF 600.1300147 MHz  
 WDW EM  
 SSB 0  
 LB 0.30 Hz  
 GB 0  
 PC 1.00

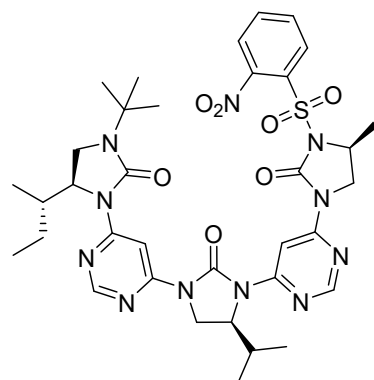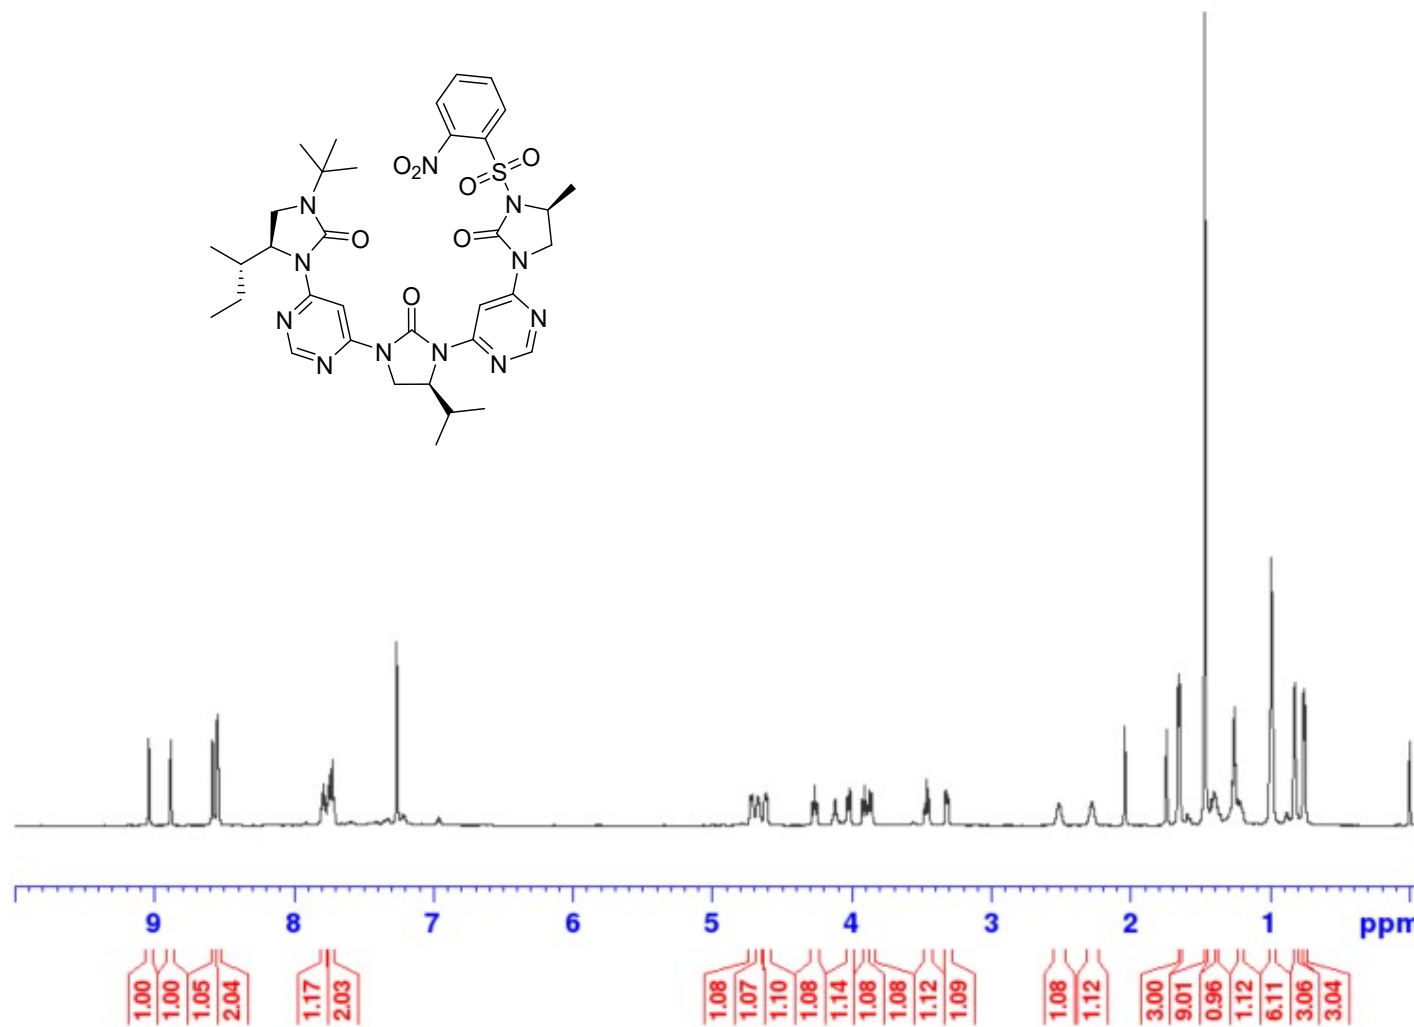

S34  
<sup>1</sup>H NMR  
 600 MHz  
 CDCl<sub>3</sub>

S34  
<sup>13</sup>C NMR  
 151 MHz  
 CDCl<sub>3</sub>

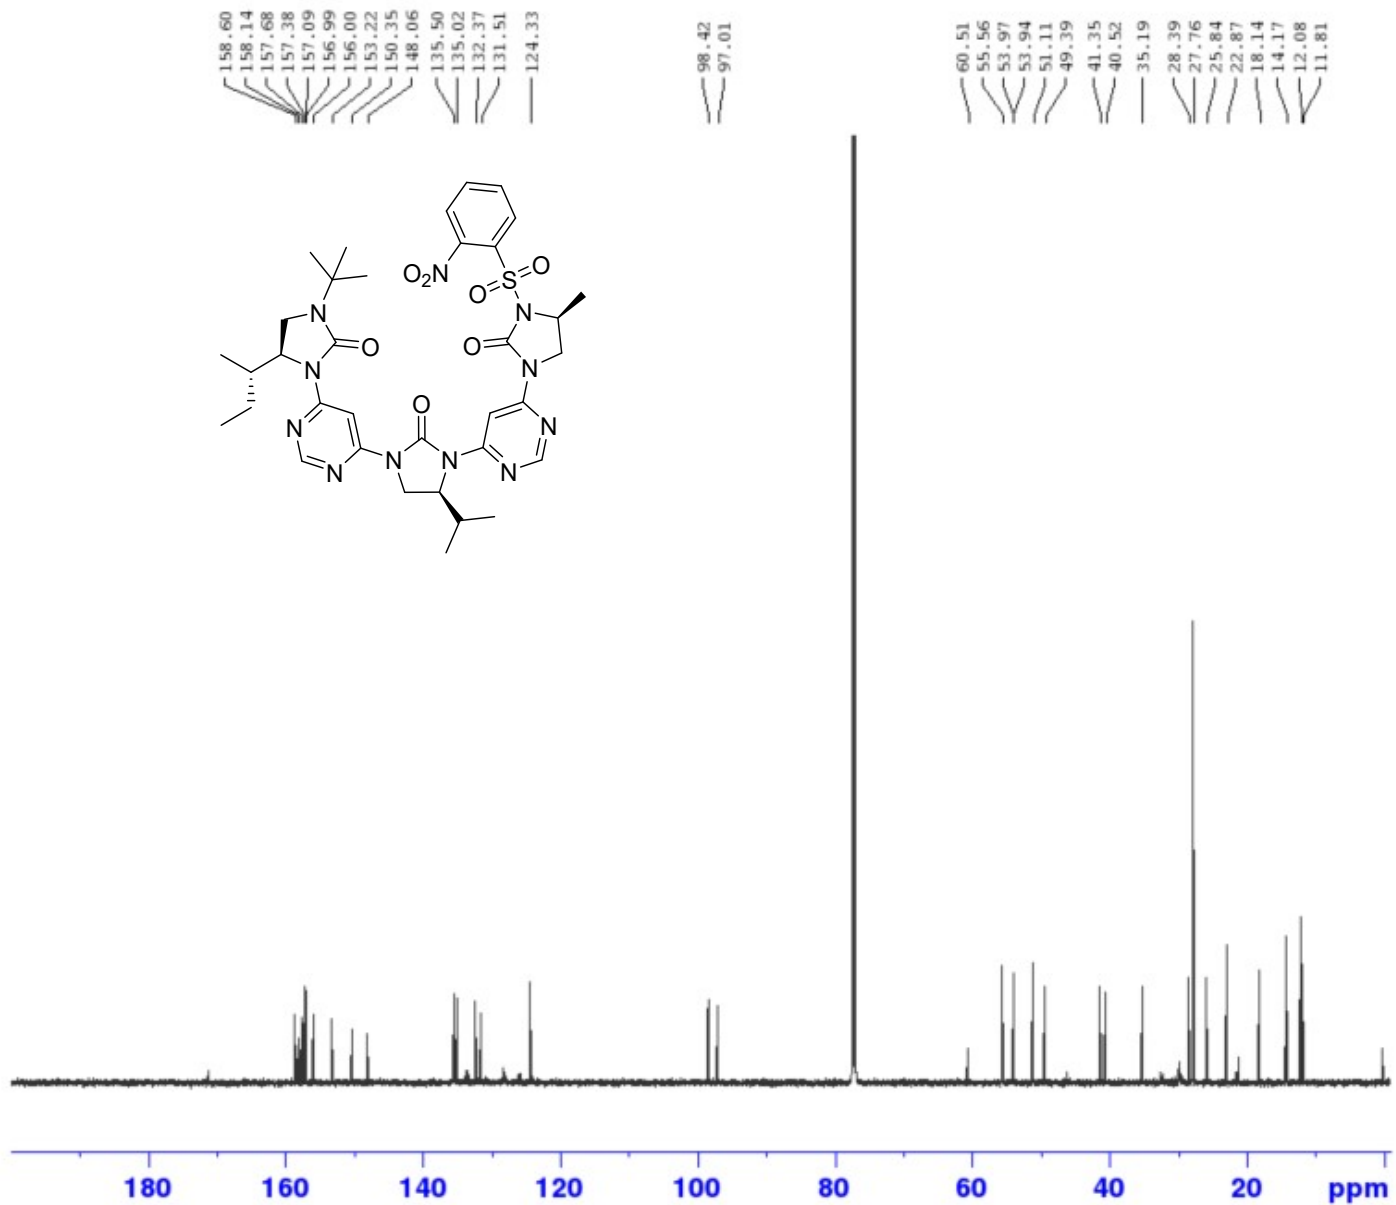

```

Current Data Parameters
NAME          TW-B-280-A
EXPNO         11
PROCNO        1

F2 - Acquisition Parameters
Date_         20190926
Time          23.44
INSTRUM       spect
PROBHD        5 mm PABBO BB/
PULPROG       zgpg30
TD            65536
SOLVENT       CDCl3
NS            2048
DS            4
SWH           36057.691 Hz
FIDRES        0.550197 Hz
AQ            0.9087659 sec
RG            186.92
DW            13.867 usec
DE            6.50 usec
TE            300.0 K
D1            2.0000000 sec
D11           0.03000000 sec
TDO           1

===== CHANNEL f1 =====
SFO1          150.9178981 MHz
NUC1           13C
P1            11.80 usec
PLW1          85.00000000 W

===== CHANNEL f2 =====
SFO2          600.1324005 MHz
NUC2           1H
CPDPRG[2]     waltz16
PCPD2         80.00 usec
PLW2          27.00000000 W
PLW12         0.43891999 W
PLW13         0.28090999 W

F2 - Processing parameters
SI            32768
SF            150.9027896 MHz
WDW           EM
SSB           0
LB            1.00 Hz
GB            0
PC            1.40
  
```

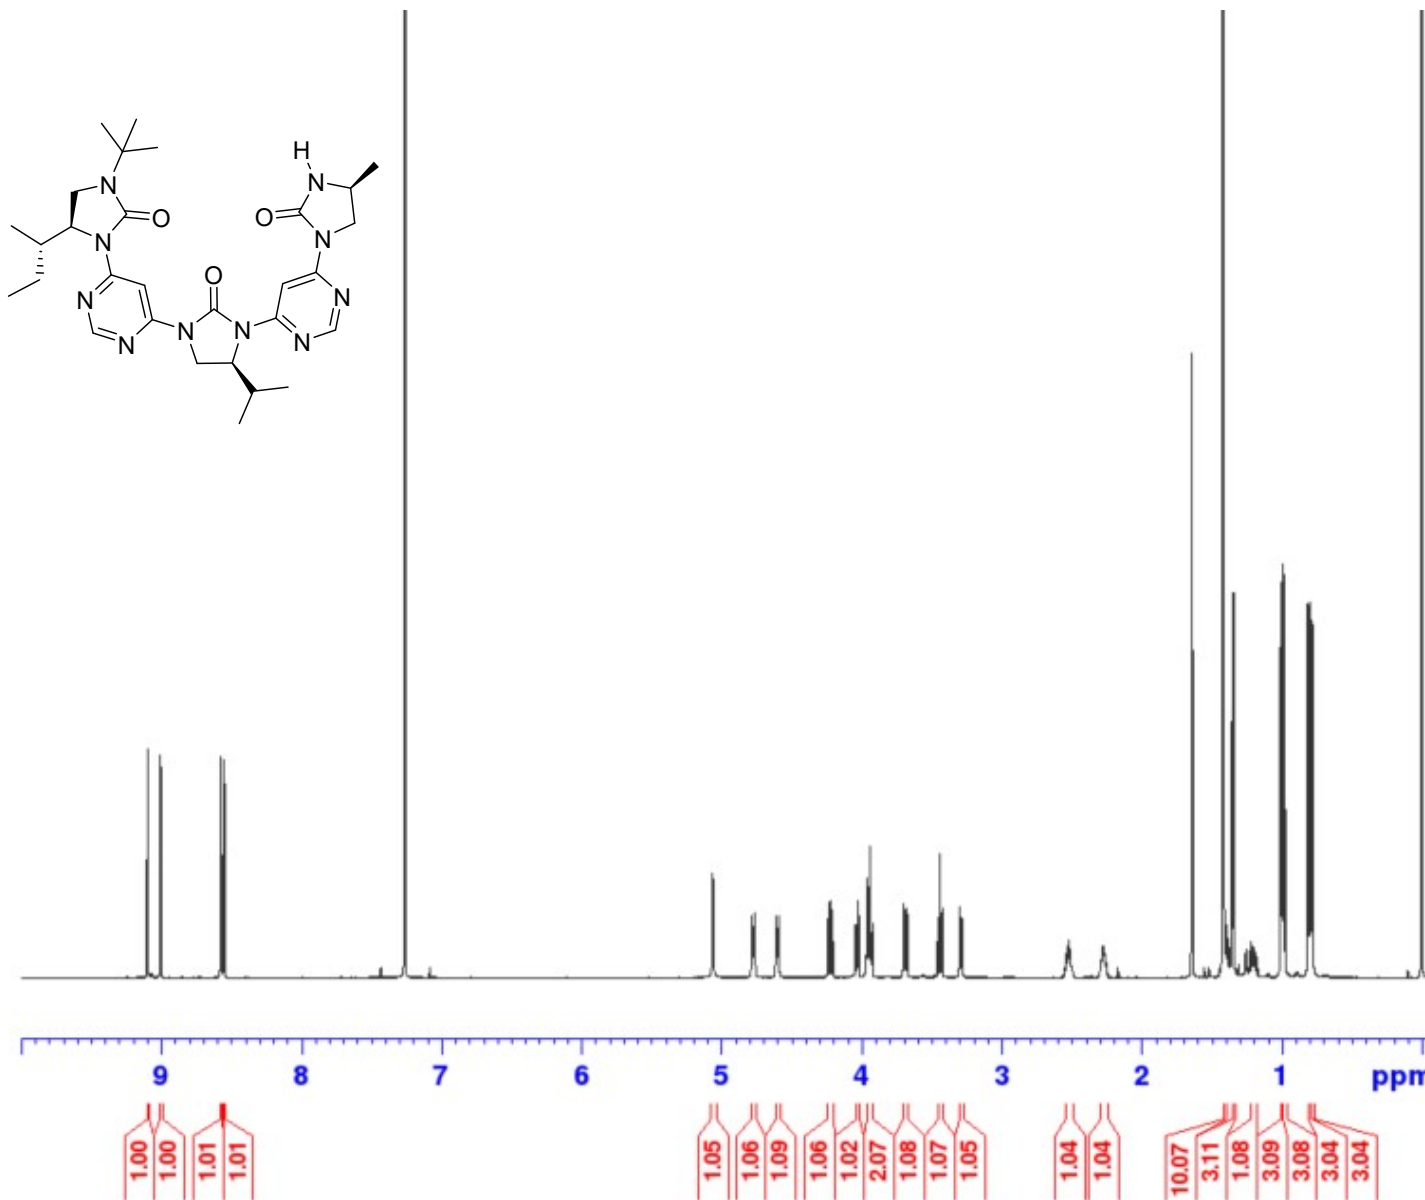

Current Data Parameters  
 NAME TW-C-405-600 FULL  
 EXPNO 10  
 PROCNO 1

F2 - Acquisition Parameters  
 Date\_ 20201213  
 Time 14.56  
 INSTRUM spect  
 PROBHD 5 mm PABBO BB/  
 PULPROG zg30  
 TD 65536  
 SOLVENT CDC13  
 NS 64  
 DS 2  
 SWH 12019.230 Hz  
 FIDRES 0.183399 Hz  
 AQ 2.7262976 sec  
 RG 186.92  
 DW 41.600 usec  
 DE 6.50 usec  
 TE 300.0 K  
 D1 1.00000000 sec  
 TDO 1

----- CHANNEL f1 -----  
 SF01 600.1337060 MHz  
 NUC1 1H  
 P1 10.00 usec  
 PLW1 26.60000038 W

F2 - Processing parameters  
 SI 65536  
 SF 600.1300141 MHz  
 WDW EM  
 SSB 0  
 LB 0.30 Hz  
 GB 0  
 PC 1.00

S35  
<sup>1</sup>H NMR  
 600 MHz  
 CDCl<sub>3</sub>



S35  
<sup>13</sup>C NMR  
 151 MHz  
 CDCl<sub>3</sub>

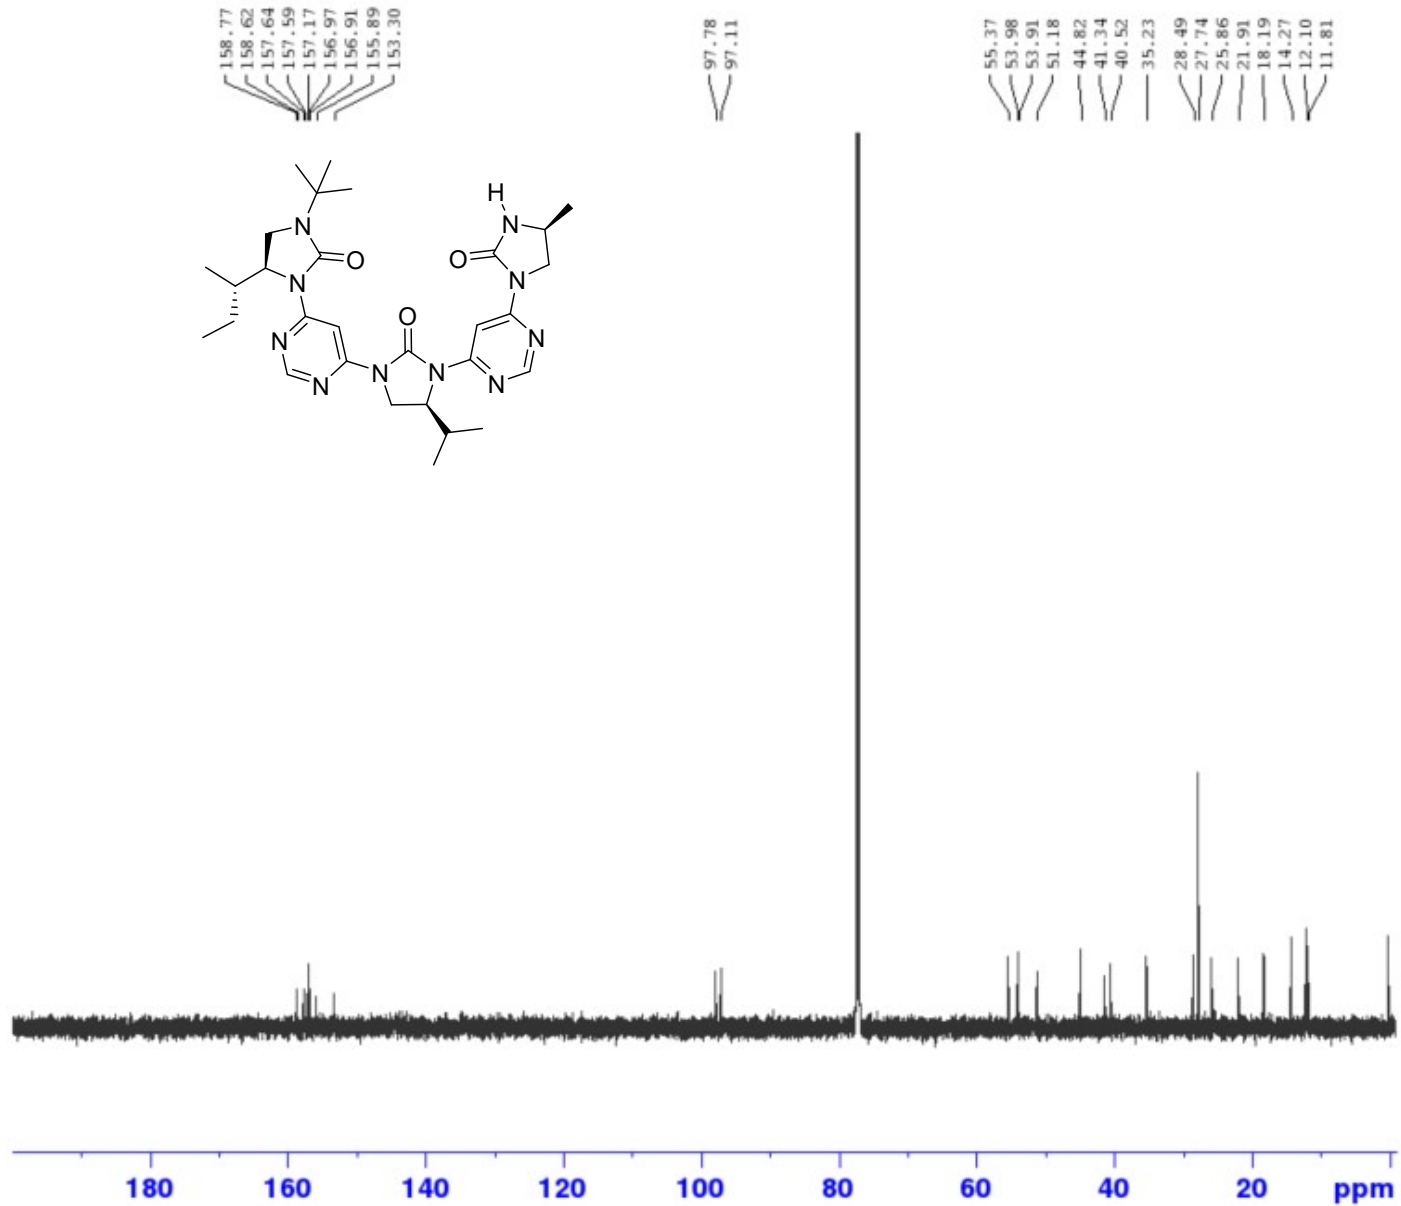

Current Data Parameters  
 NAME TW-C-405-600 FULL  
 EXPNO 11  
 PROCNO 1

F2 - Acquisition Parameters  
 Date\_ 20201213  
 Time 15.42  
 INSTRUM spect  
 PROBHD 5 mm PABBO BB/  
 PULPROG zgpg30  
 TD 119044  
 SOLVENT CDCl3  
 NS 1024  
 DS 4  
 SWH 37500.000 Hz  
 FIDRES 0.315010 Hz  
 AQ 1.5872533 sec  
 RG 186.92  
 DW 13.333 usec  
 DE 7.73 usec  
 TE 300.0 K  
 D1 1.00000000 sec  
 D11 0.03000000 sec  
 TDO 1

===== CHANNEL f1 =====  
 SFO1 150.9194058 MHz  
 NUC1 13C  
 P1 11.80 usec  
 PLW1 85.00000000 W

===== CHANNEL f2 =====  
 SFO2 600.1324005 MHz  
 NUC2 1H  
 CPDPRG[2] waltz64  
 PCPD2 80.00 usec  
 PLW2 27.00000000 W  
 PLW12 0.43891999 W  
 PLW13 0.28090999 W

F2 - Processing parameters  
 SI 131072  
 SF 150.9027872 MHz  
 WDW EM  
 SSB 0  
 LB 1.00 Hz  
 GB 0  
 PC 1.40

Current Data Parameters  
NAME TW-B-296-B  
EXPNO 10  
PROCNO 1

F2 - Acquisition Parameters  
Date\_ 20191126  
Time 16.23  
INSTRUM spect  
PROBHD 5 mm PABBO BB/  
PULPROG zg30  
TD 65536  
SOLVENT CDCl3  
NS 16  
DS 2  
SWH 12019.230 Hz  
FIDRES 0.183399 Hz  
AQ 2.7262976 sec  
RG 83.95  
DW 41.600 usec  
DE 6.50 usec  
TE 300.0 K  
D1 1.00000000 sec  
TDO 1

----- CHANNEL f1 -----  
SFO1 600.1337060 MHz  
NUC1 1H  
P1 10.00 usec  
PLW1 26.60000038 W

F2 - Processing parameters  
SI 65536  
SF 600.1300148 MHz  
WDW EM  
SSB 0  
LB 0.30 Hz  
GB 0  
PC 1.00

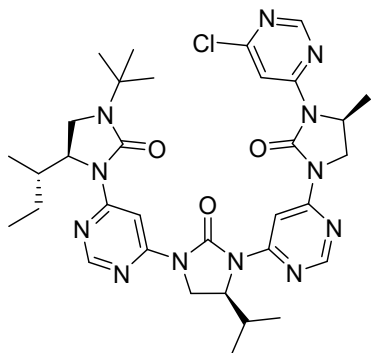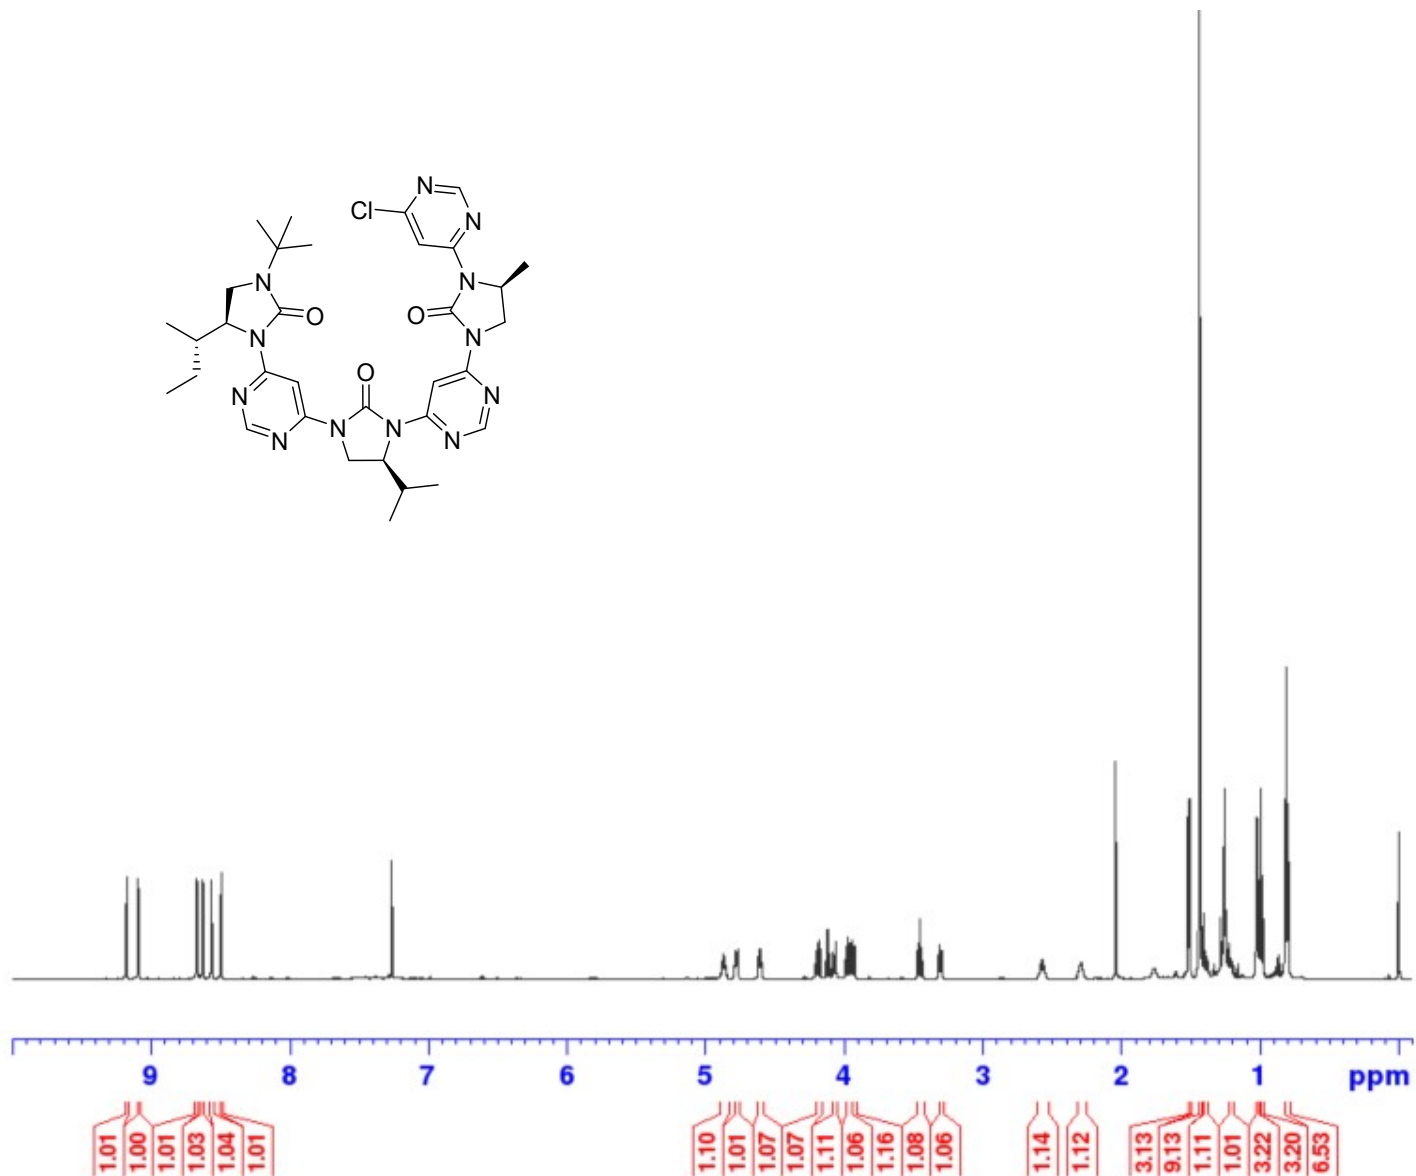

S36  
1H NMR  
600 MHz  
CDCl<sub>3</sub>

S36

<sup>13</sup>C NMR

151 MHz

CDCl<sub>3</sub>

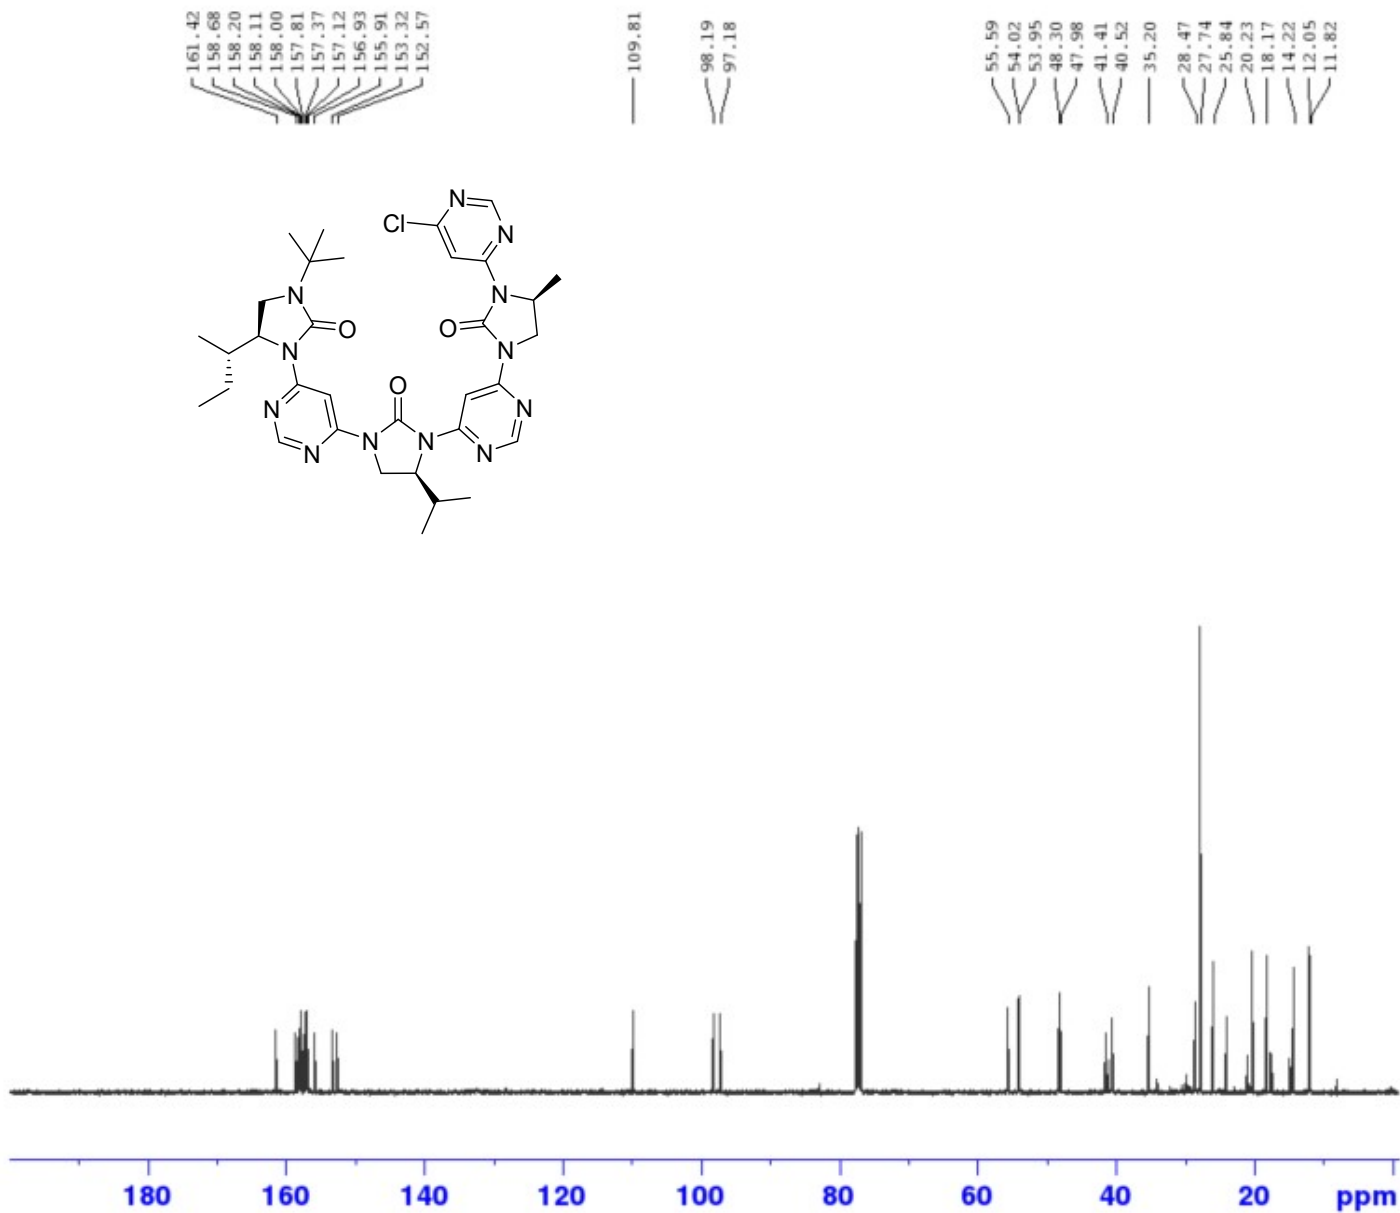

Current Data Parameters  
NAME TW-C-407  
EXPNO 11  
PROCNO 1

F2 - Acquisition Parameters  
Date\_ 20201216  
Time 0.52  
INSTRUM AVIII\_400  
PROBHD 5 mm PABBO BB/  
PULPROG zgpg30  
TD 96150  
SOLVENT CDC13  
NS 1024  
DS 4  
SWH 24038.461 Hz  
FIDRES 0.250010 Hz  
AQ 1.9999200 sec  
RG 80.6  
DW 20.800 usec  
DE 6.50 usec  
TE 299.6 K  
D1 1.00000000 sec  
D11 0.03000000 sec  
TDO 1

===== CHANNEL f1 =====  
SFO1 100.5675047 MHz  
NUC1 13C  
P1 9.00 usec  
PLW1 96.68000031 W

===== CHANNEL f2 =====  
SFO2 399.9115996 MHz  
NUC2 1H  
CPDPRG[2] waltz64  
PCPD2 90.00 usec  
PLW2 17.29199982 W  
PLW12 0.48032999 W  
PLW13 0.38907000 W

F2 - Processing parameters  
SI 131072  
SF 100.5574376 MHz  
WDW EM  
SSB 0  
LB 1.00 Hz  
GB 0  
PC 1.40

Current Data Parameters  
NAME TW-C-408  
EXPNO 10  
PROCNO 1

F2 - Acquisition Parameters  
Date\_ 20201216  
Time 15.13  
INSTRUM AVIII\_400  
PROBHD 5 mm PABBO BB/  
PULPROG zg30  
TD 65536  
SOLVENT CDC13  
NS 16  
DS 2  
SWH 8223.685 Hz  
FIDRES 0.125483 Hz  
AQ 3.9845889 sec  
RG 64  
DW 60.800 usec  
DE 6.50 usec  
TE 294.3 K  
D1 1.00000000 sec  
TDO 1

----- CHANNEL f1 -----  
SFO1 399.9124696 MHz  
NUC1 1H  
P1 15.00 usec  
PLW1 17.29199982 W

F2 - Processing parameters  
SI 32768  
SF 399.9100098 MHz  
WDW EM  
SSB 0  
LB 0.30 Hz  
GB 0  
PC 1.00

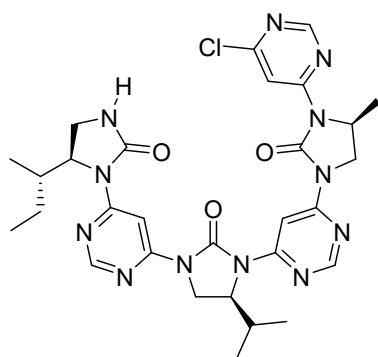

**4b**  
<sup>1</sup>H NMR  
400 MHz  
CDCl<sub>3</sub>

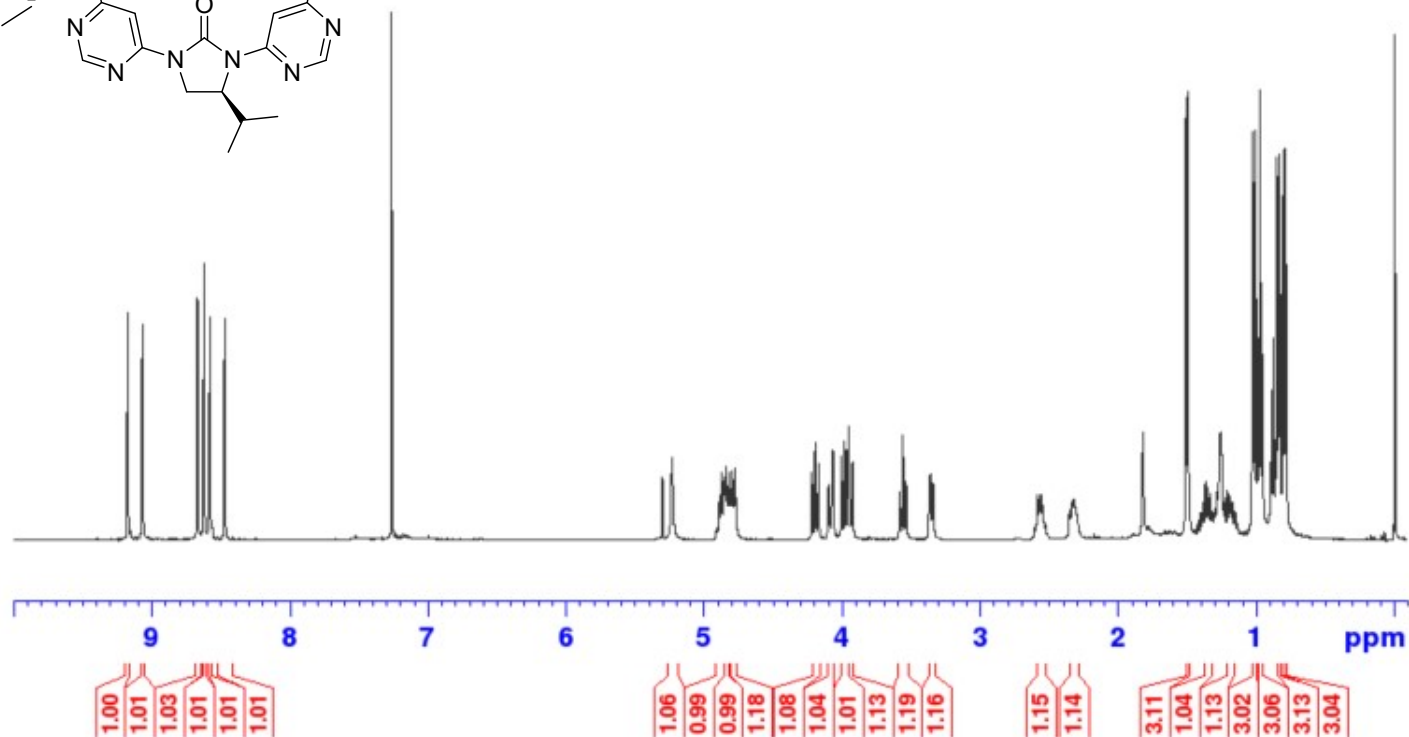

**4b**  
<sup>13</sup>C NMR  
 101 MHz  
 CDCl<sub>3</sub>

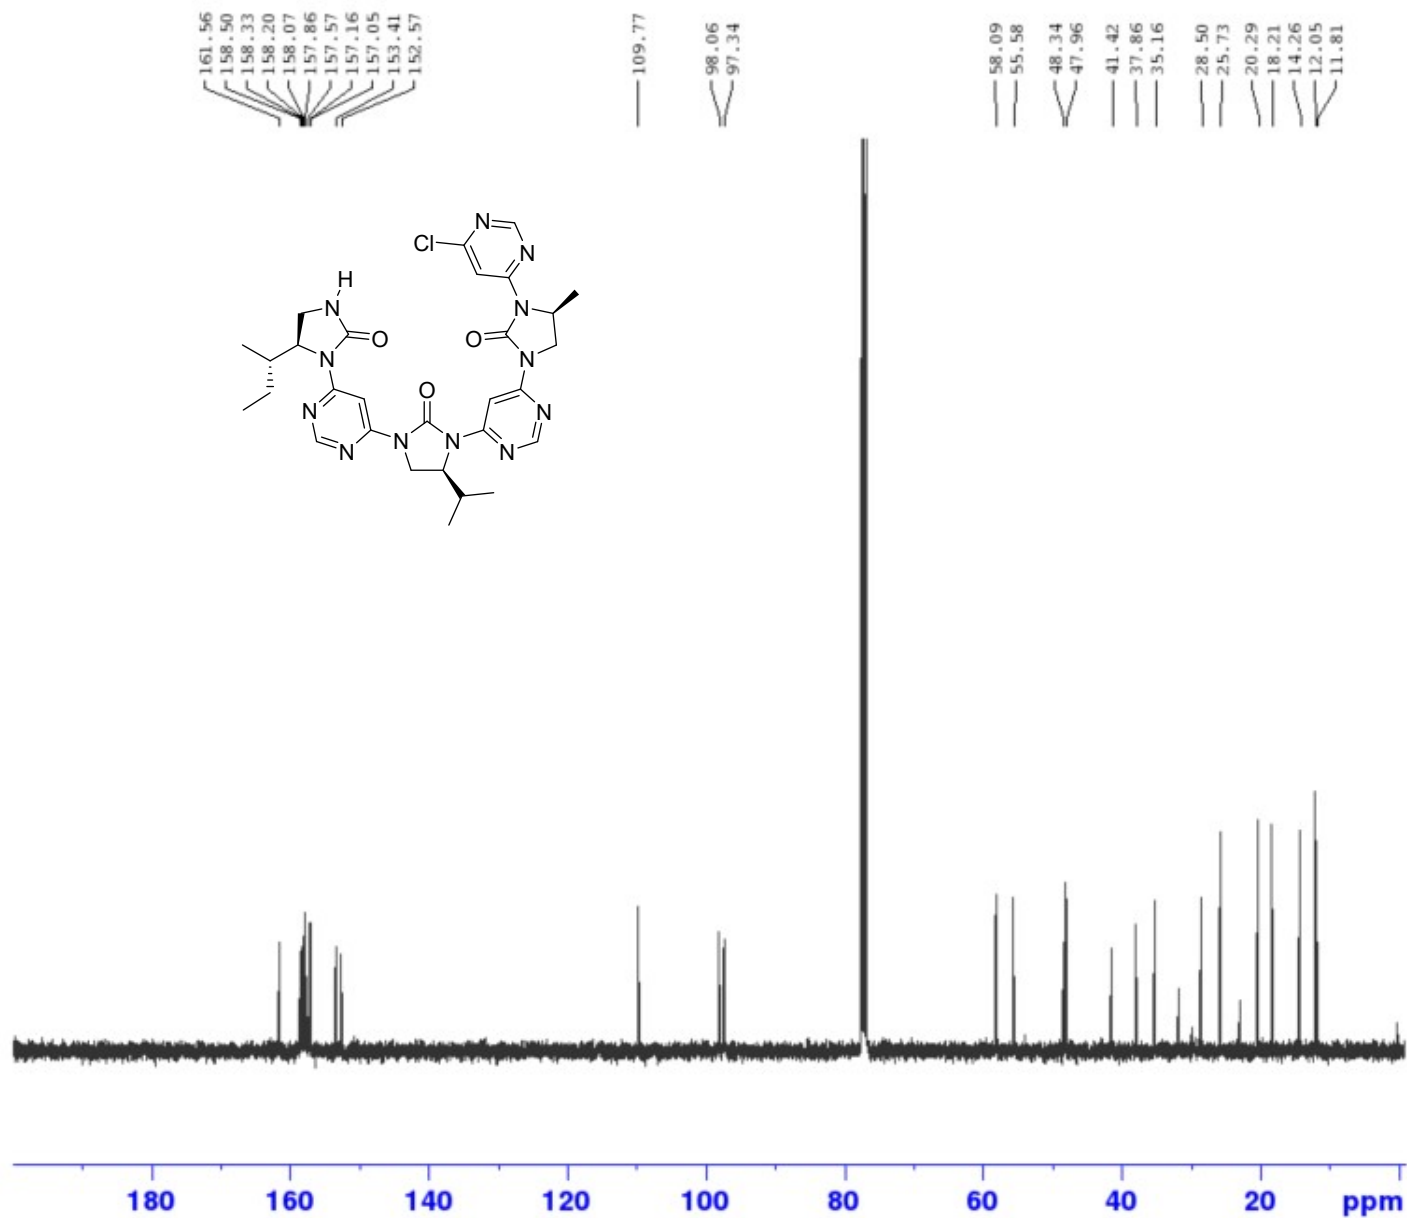

```

Current Data Parameters
NAME          TW-C-408
EXPNO         11
PROCNO        1

F2 - Acquisition Parameters
Date_         20201216
Time          20.49
INSTRUM       AVIII_400
PROBHD        5 mm PABBO BB/
PULPROG       zgpg30
TD            96150
SOLVENT       CDC13
NS            1024
DS            4
SWH           24038.461 Hz
FIDRES        0.250010 Hz
AQ            1.9999200 sec
RG            144
DW            20.800 usec
DE            6.50 usec
TE            300.3 K
D1            1.00000000 sec
D11           0.03000000 sec
TD0           1

===== CHANNEL f1 =====
SFO1          100.5675047 MHz
NUC1           13C
P1             9.00 usec
PLW1          96.68000031 W

===== CHANNEL f2 =====
SFO2          399.9115996 MHz
NUC2            1H
CPDPRG[2]     waltz64
PCPD2         90.00 usec
PLW2          17.29199982 W
PLW12         0.48032999 W
PLW13         0.38907000 W

F2 - Processing parameters
SI            131072
SF            100.5574351 MHz
WDW           EM
SSB           0
LB            1.00 Hz
GB            0
PC            1.40
  
```

Current Data Parameters  
 NAME TW-A-186 600 31-08-20  
 EXPNO 10  
 PROCNO 1

F2 - Acquisition Parameters  
 Date\_ 20200829  
 Time 6.50  
 INSTRUM spect  
 PROBHD 5 mm PABBO BB/  
 PULPROG zg30  
 TD 65536  
 SOLVENT CDCl3  
 NS 64  
 DS 2  
 SWH 12019.230 Hz  
 FIDRES 0.183399 Hz  
 AQ 2.7262976 sec  
 RG 148.05  
 DW 41.600 usec  
 DE 6.50 usec  
 TE 300.0 K  
 D1 1.00000000 sec  
 TD0 1

----- CHANNEL f1 -----  
 SFO1 600.1337060 MHz  
 NUC1 1H  
 P1 10.00 usec  
 PLW1 26.60000038 W

F2 - Processing parameters  
 SI 65536  
 SF 600.1300146 MHz  
 WDW EM  
 SSB 0  
 LB 0.30 Hz  
 GB 0  
 PC 1.00

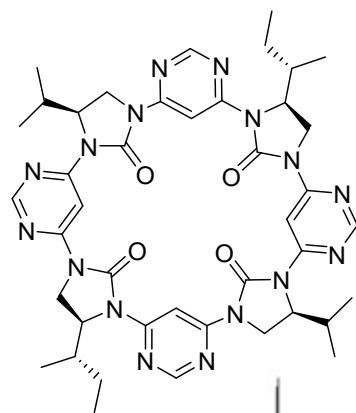

3a

<sup>1</sup>H NMR

600 MHz

CDCl<sub>3</sub>

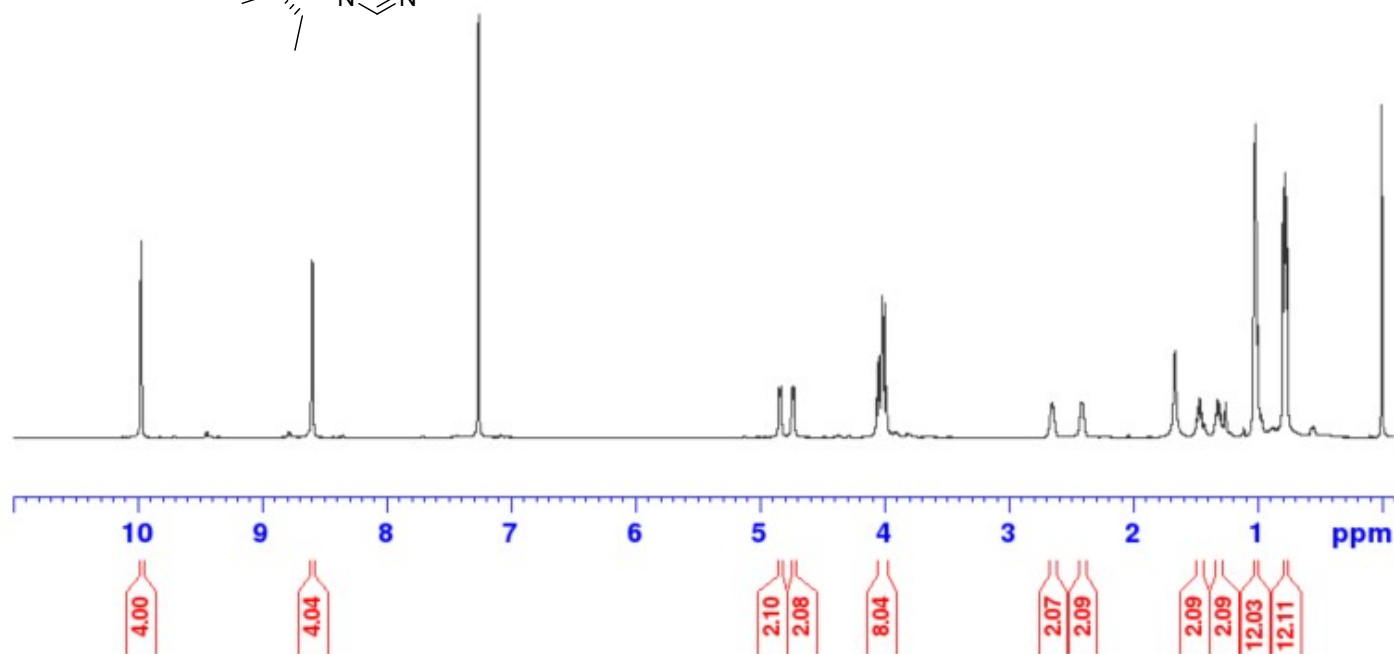

**3a**  
<sup>13</sup>C NMR  
 151 MHz  
 CDCl<sub>3</sub>

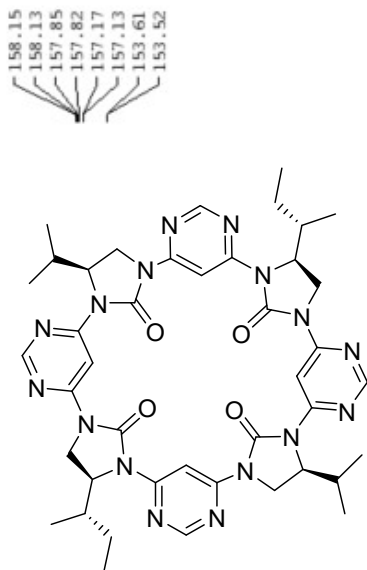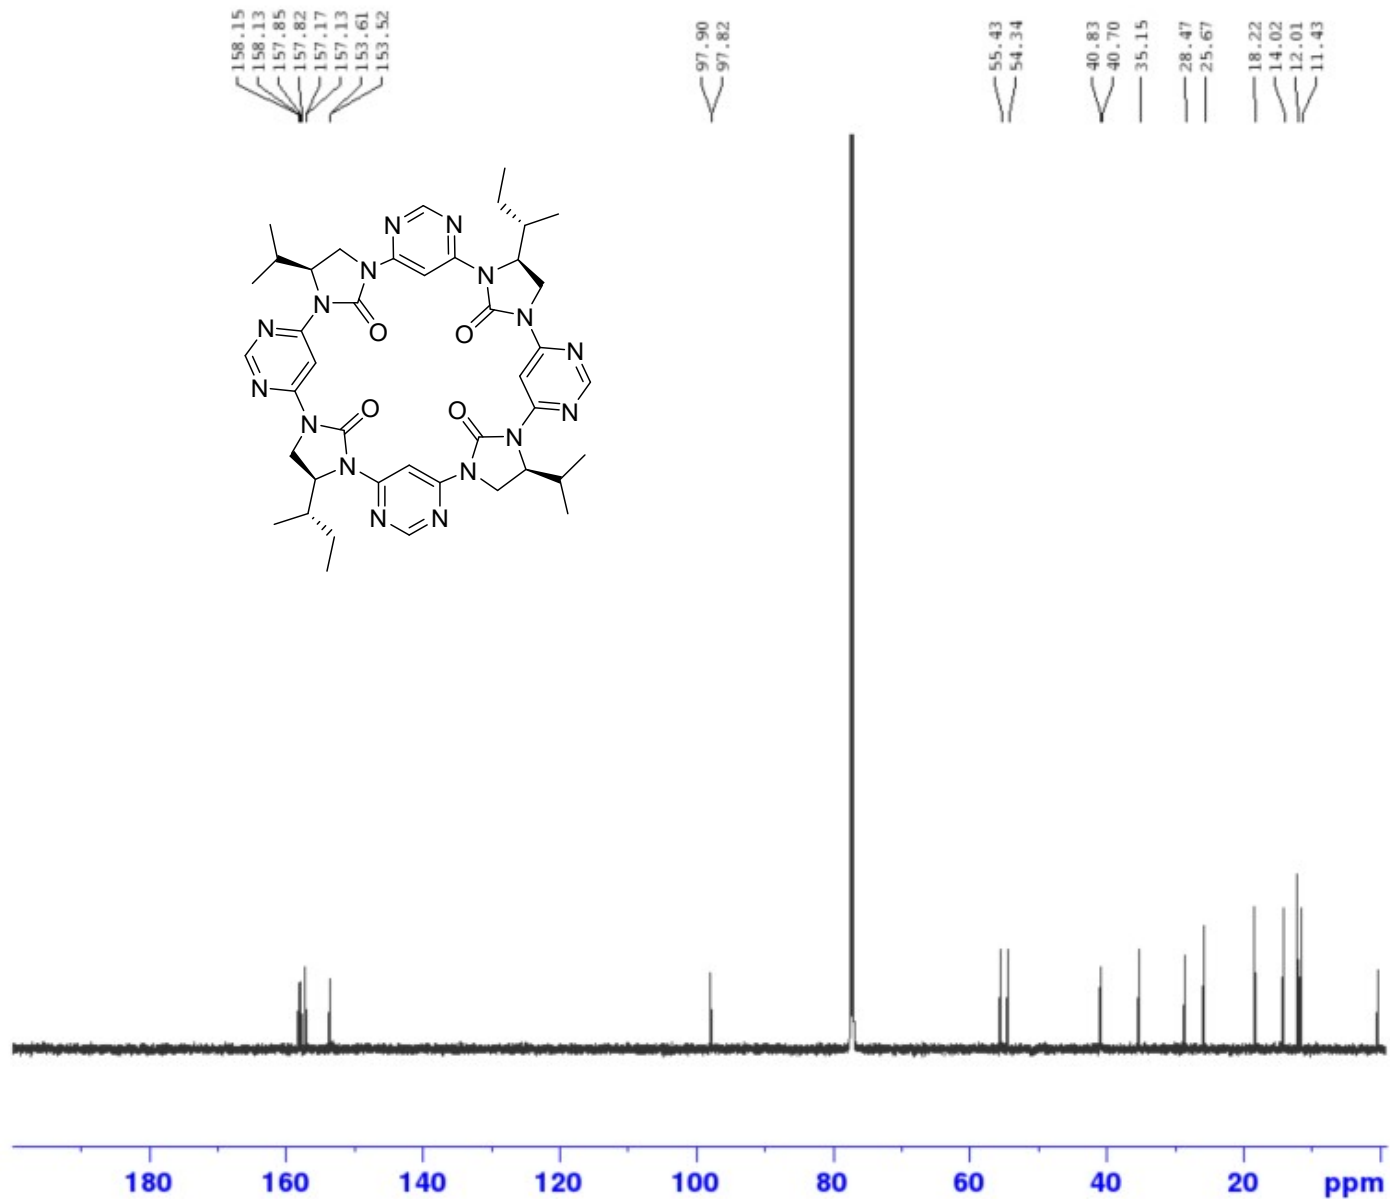

Current Data Parameters  
 NAME TW-A-186 600 31-08-20  
 EXPNO 17  
 PROCNO 1

F2 - Acquisition Parameters  
 Date\_ 20200830  
 Time 4.48  
 INSTRUM spect  
 PROBHD 5 mm PABBO BB/  
 PULPROG zgpg30  
 TD 119044  
 SOLVENT CDCl3  
 NS 4000  
 DS 4  
 SWH 37500.000 Hz  
 FIDRES 0.315010 Hz  
 AQ 1.5872533 sec  
 RG 186.92  
 DW 13.333 usec  
 DE 7.73 usec  
 TE 300.0 K  
 D1 1.00000000 sec  
 D11 0.03000000 sec  
 TD0 1

===== CHANNEL f1 =====  
 SFO1 150.9194058 MHz  
 NUC1 13C  
 P1 11.80 usec  
 PLW1 85.00000000 W

===== CHANNEL f2 =====  
 SFO2 600.1324005 MHz  
 NUC2 1H  
 CPDPRG[2] waltz64  
 PCPD2 80.00 usec  
 PLW2 27.00000000 W  
 PLW12 0.43891999 W  
 PLW13 0.28090999 W

F2 - Processing parameters  
 SI 131072  
 SF 150.9027870 MHz  
 WDW EM  
 SSB 0  
 LB 1.00 Hz  
 GB 0  
 PC 1.40

**3b**  
<sup>1</sup>H NMR  
600 MHz  
CDCl<sub>3</sub>

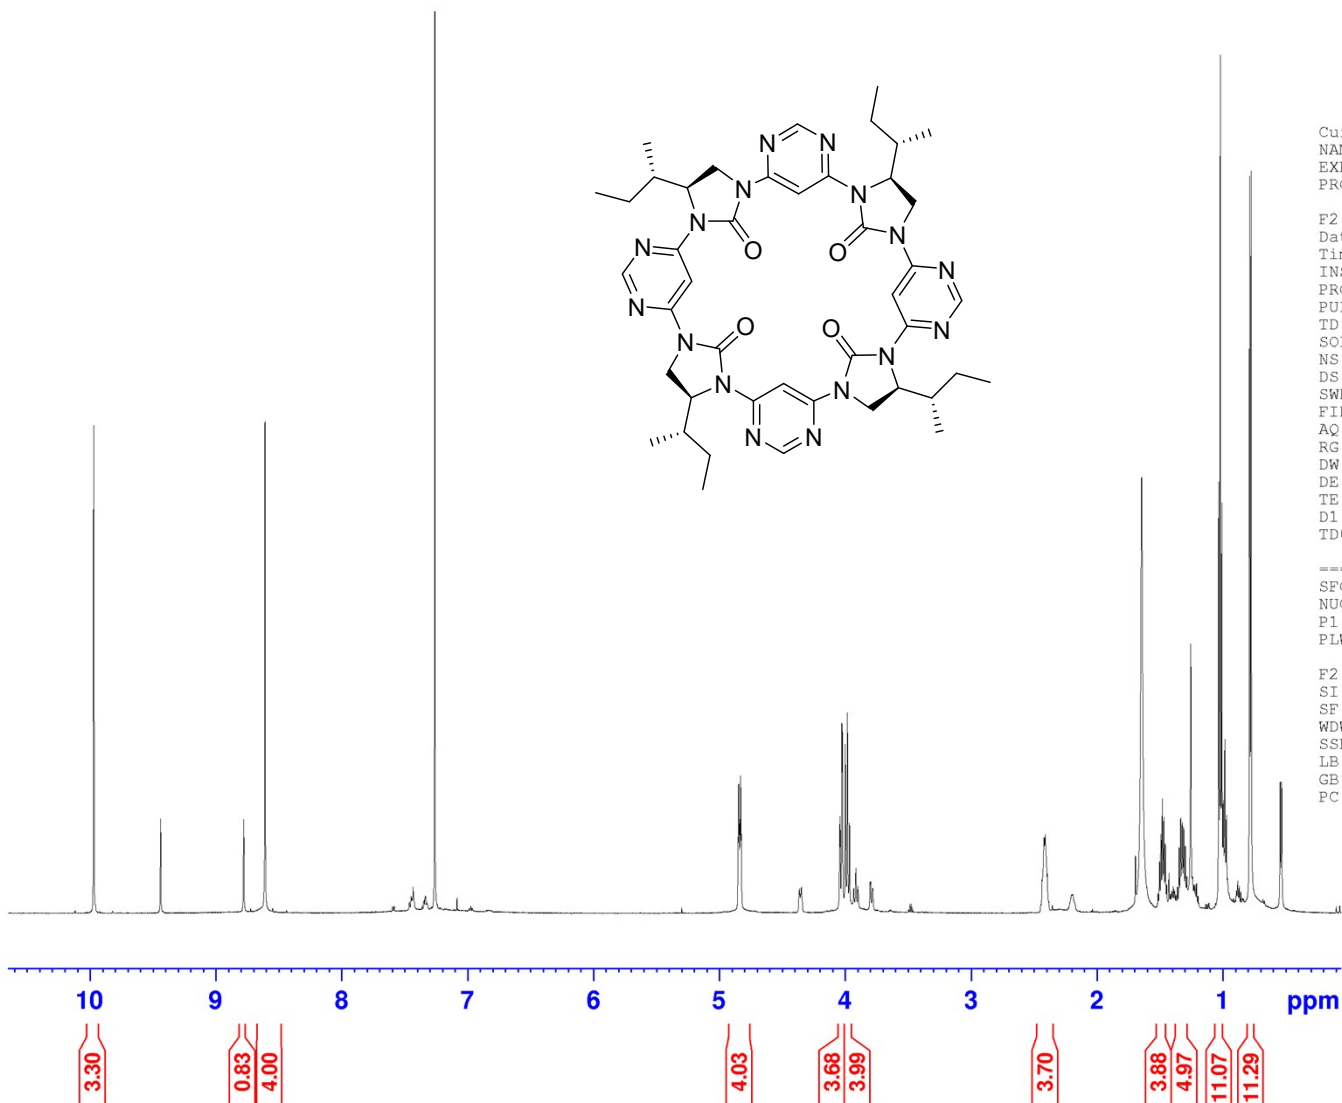

Current Data Parameters  
NAME TW-A-250 600 31-08-20  
EXPNO 10  
PROCNO 1

F2 - Acquisition Parameters  
Date\_ 20200829  
Time\_ 11.38  
INSTRUM spect  
PROBHD 5 mm PABBO BB/  
PULPROG zg30  
TD 65536  
SOLVENT CDCl3  
NS 64  
DS 2  
SWH 12019.230 Hz  
FIDRES 0.183399 Hz  
AQ 2.7262976 sec  
RG 168.12  
DW 41.600 usec  
DE 6.50 usec  
TE 300.0 K  
D1 1.00000000 sec  
TD0 1

===== CHANNEL f1 =====  
SF01 600.1337060 MHz  
NUC1 1H  
P1 10.00 usec  
PLW1 26.60000038 W

F2 - Processing parameters  
SI 65536  
SF 600.1300132 MHz  
WDW EM  
SSB 0  
LB 0.30 Hz  
GB 0  
PC 1.00



**3b**  
<sup>13</sup>C NMR  
151 MHz  
CDCl<sub>3</sub>

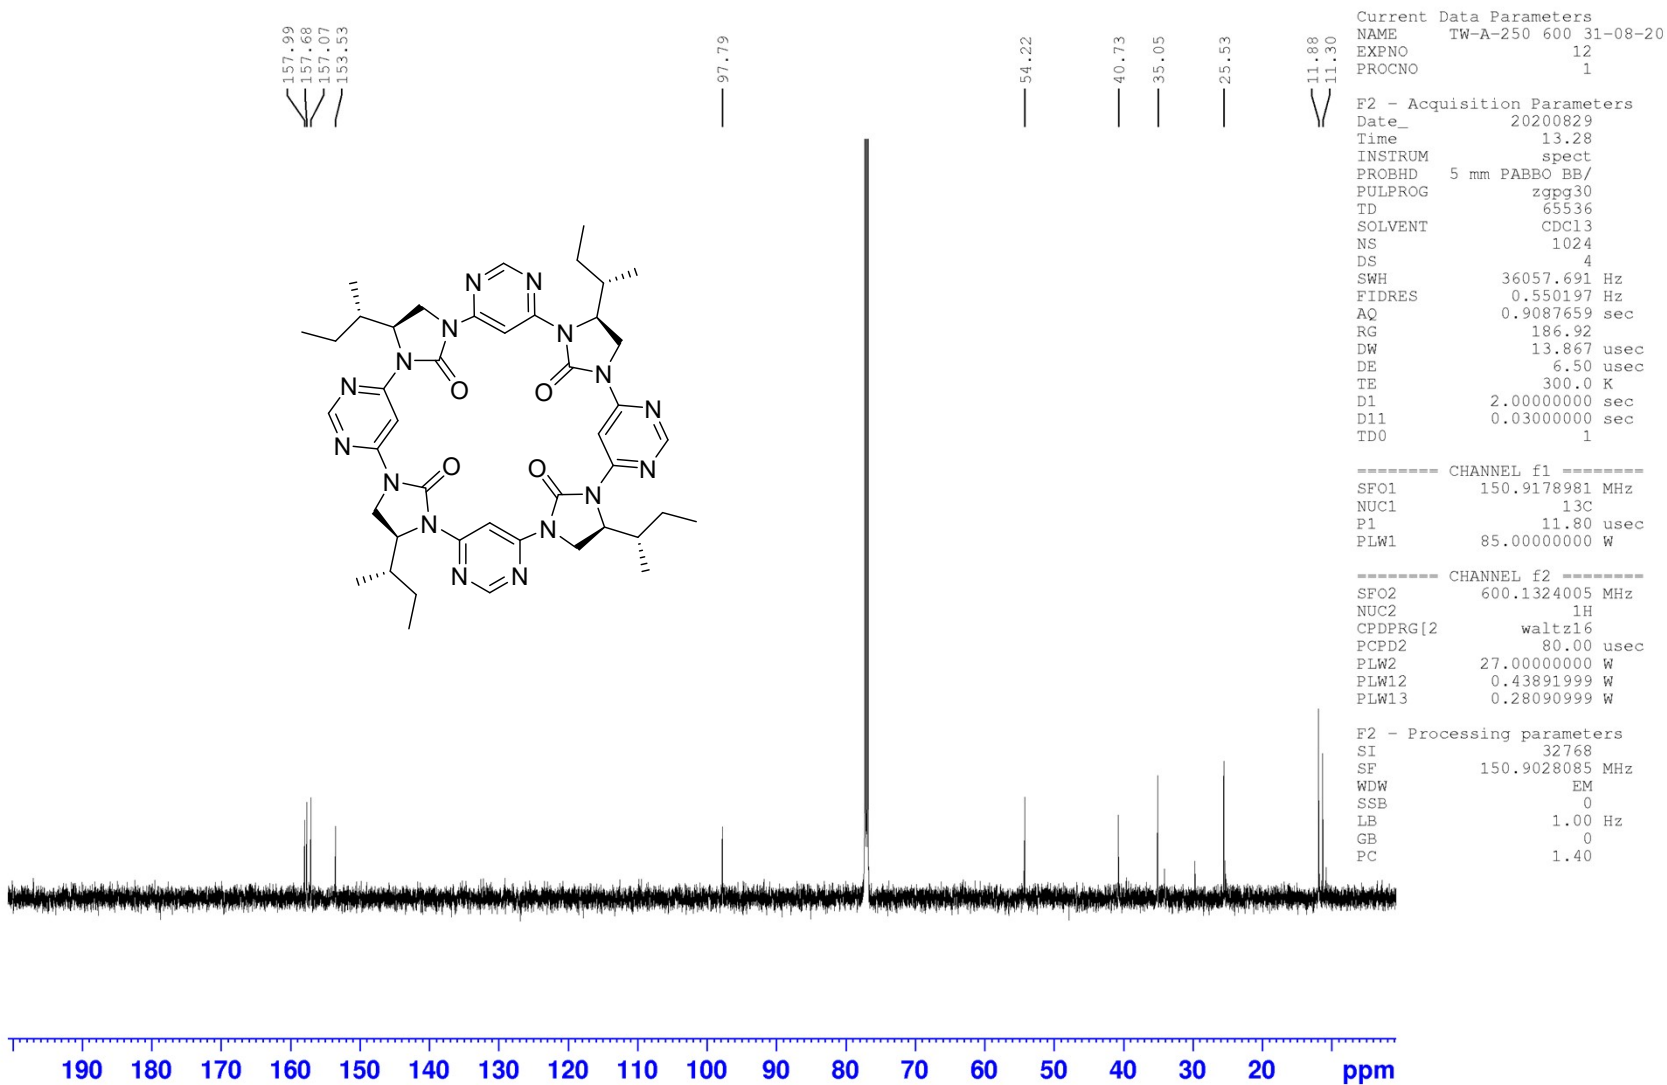

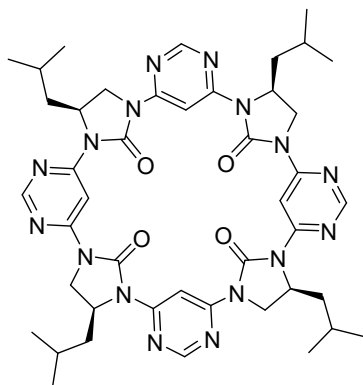

**3c**

<sup>1</sup>H NMR

600 MHz

CDCl<sub>3</sub>

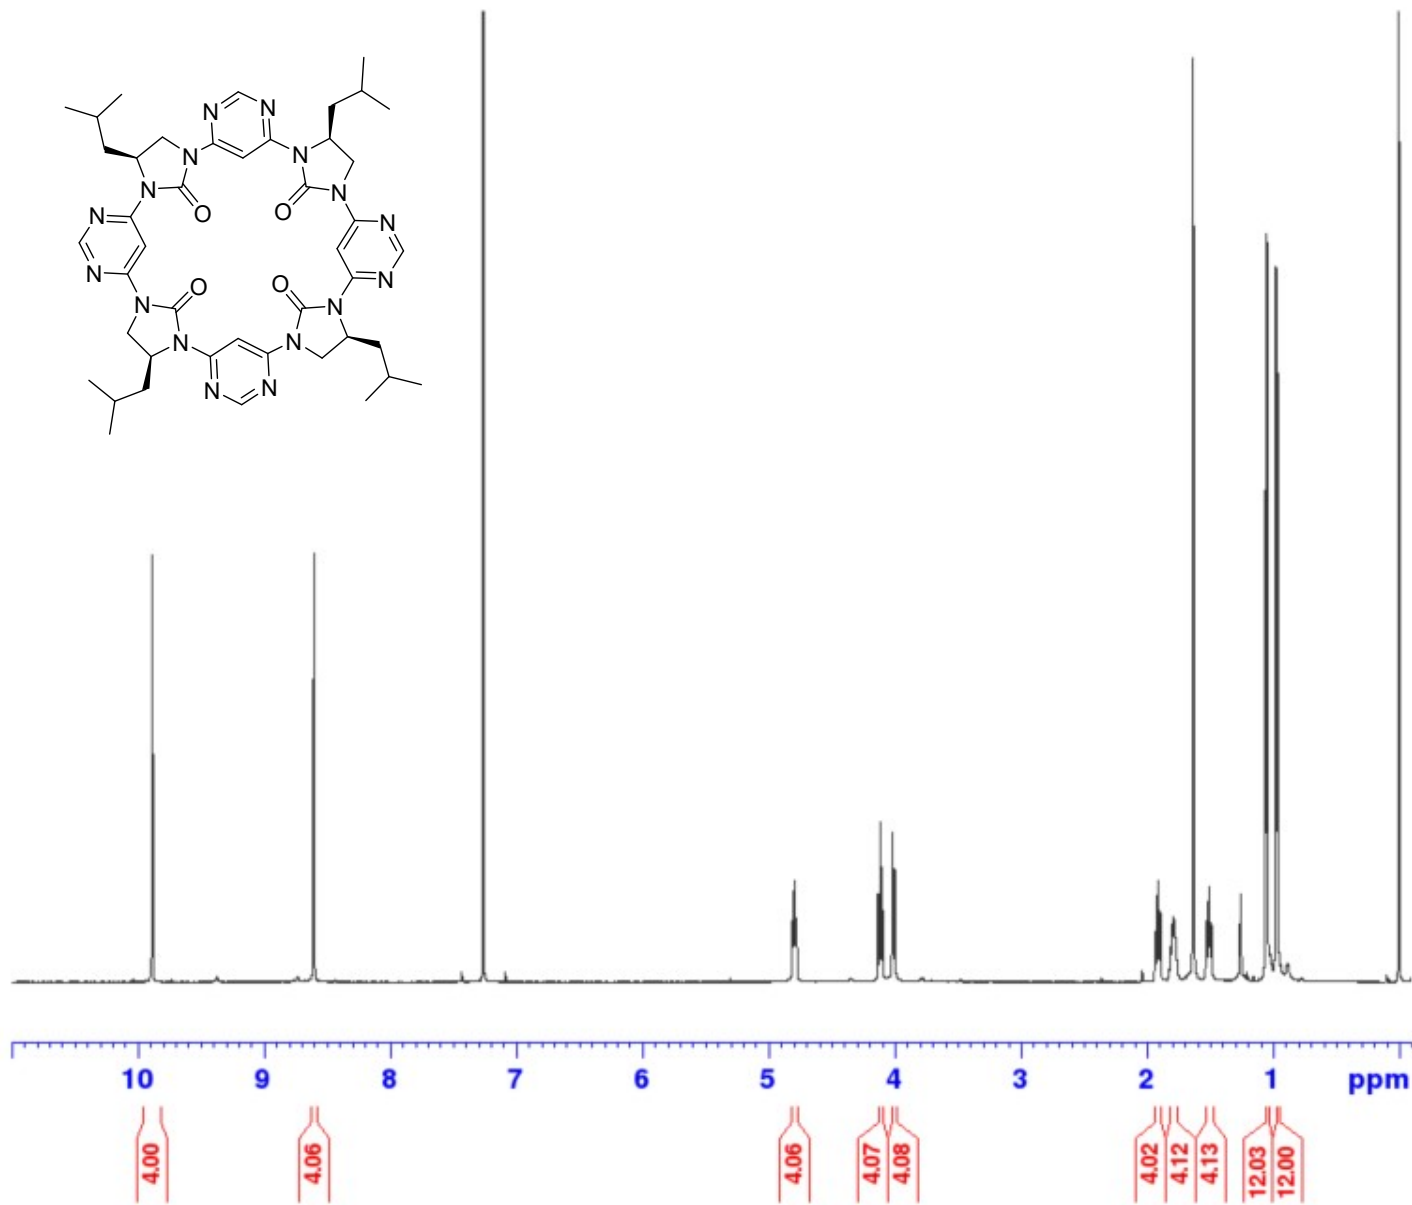

Current Data Parameters  
 NAME TW-A-167-A 600 31-08-20  
 EXPNO 10  
 PROCNO 1

F2 - Acquisition Parameters  
 Date\_ 20200828  
 Time 21.15  
 INSTRUM spect  
 PROBHD 5 mm PABBO BB/  
 PULPROG zg30  
 TD 65536  
 SOLVENT CDCl3  
 NS 64  
 DS 2  
 SWH 12019.230 Hz  
 FIDRES 0.183399 Hz  
 AQ 2.7262976 sec  
 RG 105.21  
 DW 41.600 usec  
 DE 6.50 usec  
 TE 300.0 K  
 D1 1.00000000 sec  
 TDO 1

----- CHANNEL f1 -----  
 SF01 600.1337060 MHz  
 NUC1 1H  
 P1 10.00 usec  
 PLW1 26.60000038 W

F2 - Processing parameters  
 SI 65536  
 SF 600.1300144 MHz  
 WDW EM  
 SSB 0  
 LB 0.30 Hz  
 GB 0  
 PC 1.00

**3c**  
<sup>13</sup>C NMR  
151 MHz  
CDCl<sub>3</sub>

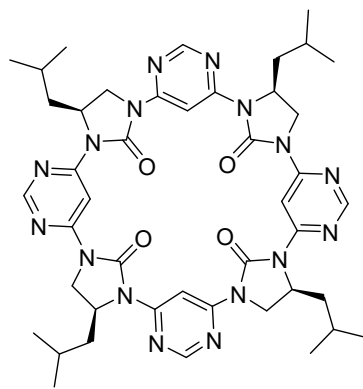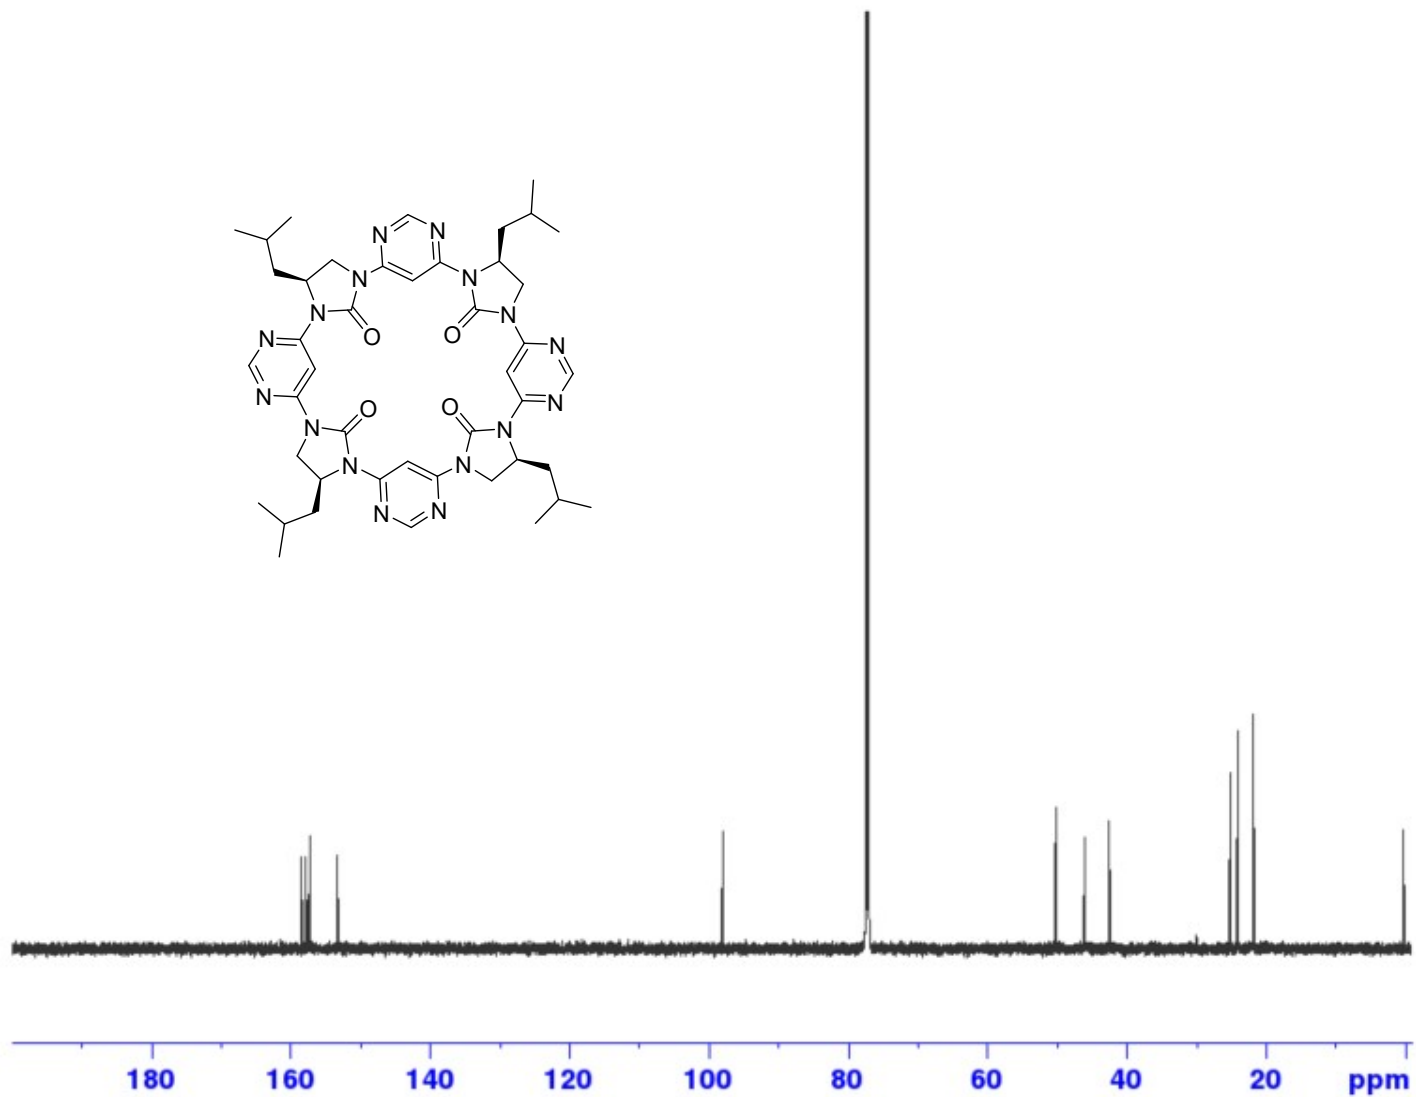

Current Data Parameters  
NAME TW-A-167-A 600 31-08-20  
EXPNO 17  
PROCNO 1

F2 - Acquisition Parameters  
Date\_ 20200830  
Time 0.05  
INSTRUM spect  
PROBHD 5 mm PABBO BB/  
PULPROG zgpg30  
TD 119044  
SOLVENT CDCl3  
NS 4096  
DS 4  
SWH 37500.000 Hz  
FIDRES 0.315010 Hz  
AQ 1.5872533 sec  
RG 186.92  
DW 13.333 usec  
DE 7.73 usec  
TE 300.0 K  
D1 1.00000000 sec  
D11 0.03000000 sec  
TDO 1

----- CHANNEL f1 -----  
SFO1 150.9194058 MHz  
NUC1 13C  
P1 11.80 usec  
PLW1 85.00000000 W

----- CHANNEL f2 -----  
SFO2 600.1324005 MHz  
NUC2 1H  
CFDPRG[2] waltz64  
PCPD2 80.00 usec  
PLW2 27.00000000 W  
PLW12 0.43891999 W  
PLW13 0.28090999 W

F2 - Processing parameters  
SI 131072  
SF 150.9027869 MHz  
WDW EM  
SSB 0  
LB 1.00 Hz  
GB 0  
PC 1.40

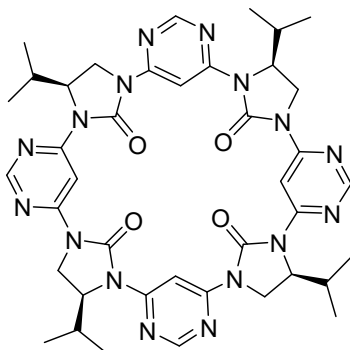

Current Data Parameters  
 NAME TW-A-238 600 31-08-20  
 EXPNO 10  
 PROCNO 1

F2 - Acquisition Parameters  
 Date\_ 20200829  
 Time 2.02  
 INSTRUM spect  
 PROBHD 5 mm PABBO BB/  
 PULPROG zg30  
 TD 65536  
 SOLVENT CDCl3  
 NS 64  
 DS 2  
 SWH 12019.230 Hz  
 FIDRES 0.183399 Hz  
 AQ 2.7262976 sec  
 RG 105.21  
 DW 41.600 usec  
 DE 6.50 usec  
 TE 300.0 K  
 D1 1.0000000 sec  
 TD0 1

===== CHANNEL f1 =====  
 SF01 600.1337060 MHz  
 NUC1 1H  
 P1 10.00 usec  
 PLW1 26.60000038 W

F2 - Processing parameters  
 SI 65536  
 SF 600.1300147 MHz  
 WDW EM  
 SSB 0  
 LB 0.30 Hz  
 GB 0  
 PC 1.00

**3d**  
<sup>1</sup>H NMR  
 600 MHz  
 CDCl<sub>3</sub>

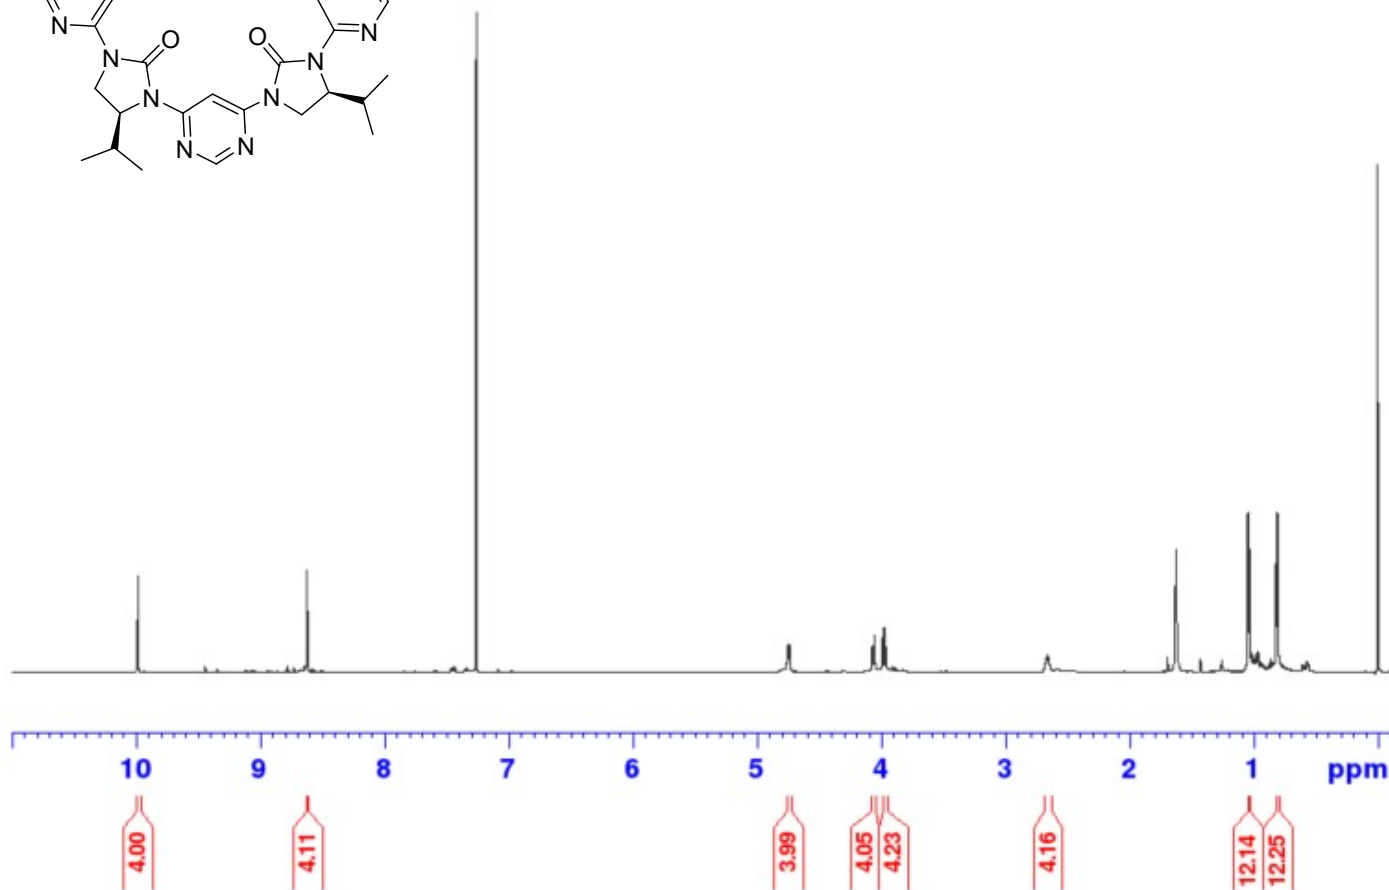

**3d**  
<sup>13</sup>C NMR  
 151 MHz  
 CDCl<sub>3</sub>

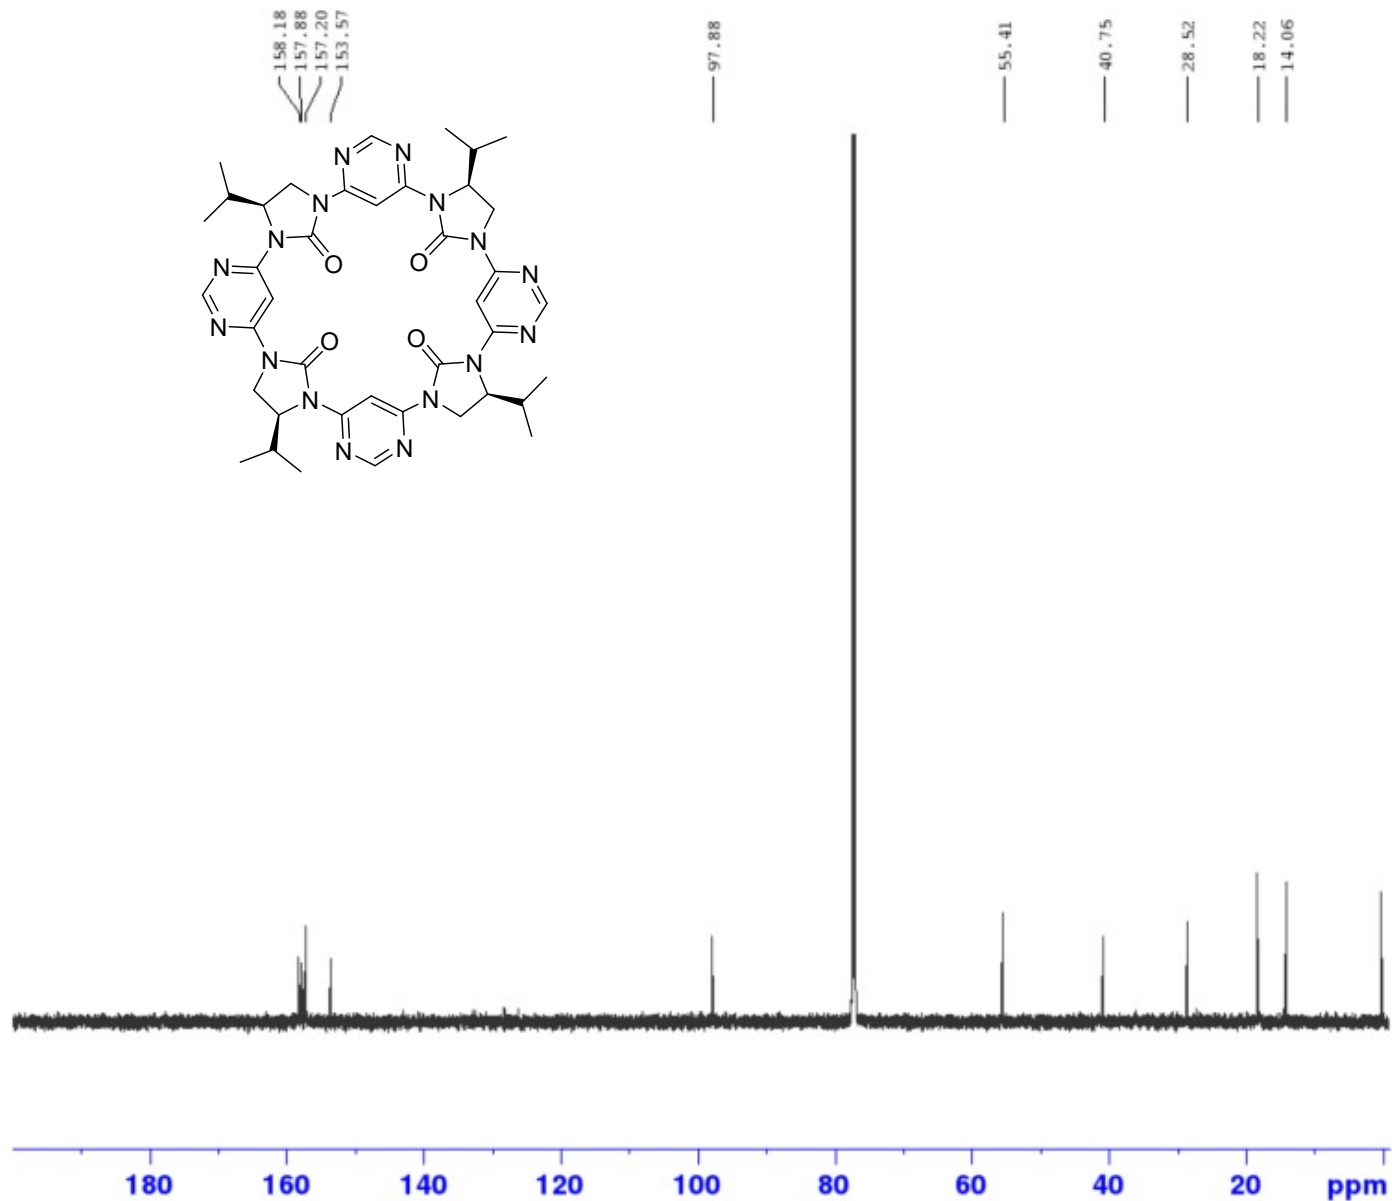

Current Data Parameters  
 NAME TW-A-238 600 31-08-20  
 EXPNO 17  
 PROCNO 1

F2 - Acquisition Parameters  
 Date\_ 20200830  
 Time 9.29  
 INSTRUM spect  
 PROBHD 5 mm PABBO BB/  
 PULPROG zgpg30  
 TD 119044  
 SOLVENT CDCl3  
 NS 4000  
 DS 4  
 SWH 37500.000 Hz  
 FIDRES 0.315010 Hz  
 AQ 1.5872533 sec  
 RG 186.92  
 DW 13.333 usec  
 DE 7.73 usec  
 TE 300.0 K  
 D1 1.00000000 sec  
 D11 0.03000000 sec  
 TD0 1

===== CHANNEL f1 =====  
 SFO1 150.9194058 MHz  
 NUC1 13C  
 P1 11.80 usec  
 PLW1 85.00000000 W

===== CHANNEL f2 =====  
 SFO2 600.1324005 MHz  
 NUC2 1H  
 CPDPRG[2] waltz64  
 PCPD2 80.00 usec  
 PLW2 27.00000000 W  
 PLW12 0.43891999 W  
 PLW13 0.28090999 W

F2 - Processing parameters  
 SI 131072  
 SF 150.9027867 MHz  
 WDW EM  
 SSB 0  
 LB 1.00 Hz  
 GB 0  
 PC 1.40

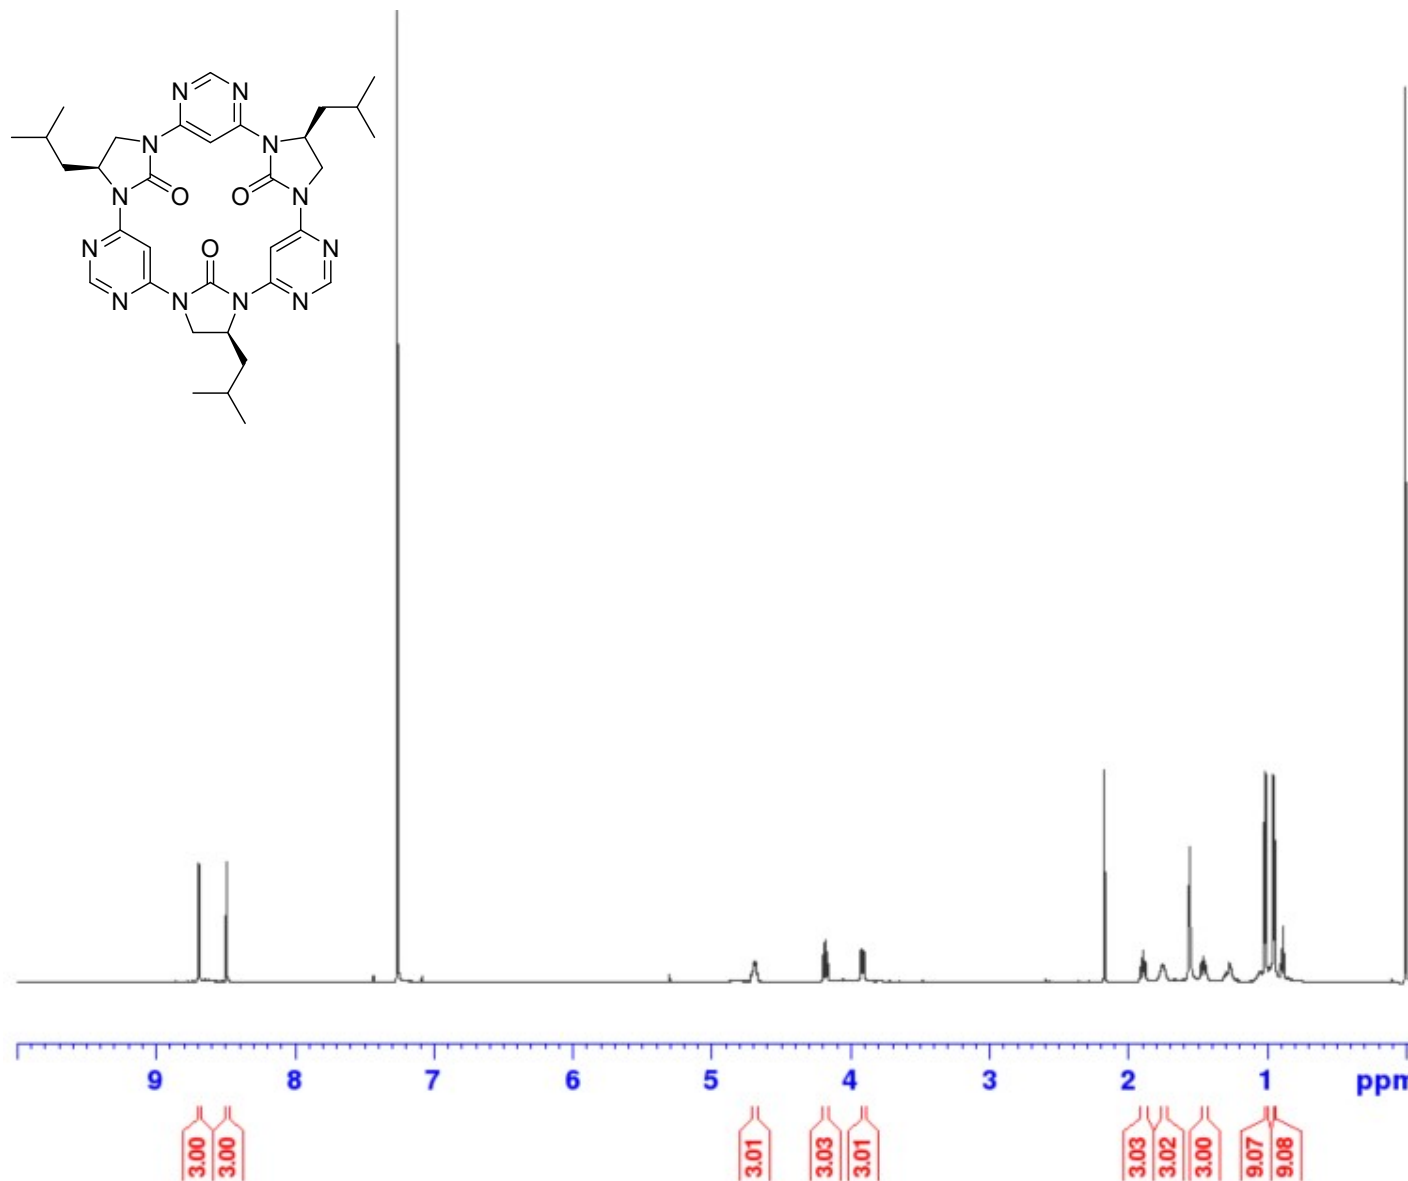

Current Data Parameters  
 NAME TW-B-404 pure Full  
 EXPNO 10  
 PROCNO 1

F2 - Acquisition Parameters  
 Date\_ 20201215  
 Time 3.23  
 INSTRUM spect  
 PROBHD 5 mm PABBO BB/  
 PULPROG zg30  
 TD 65536  
 SOLVENT CDC13  
 NS 256  
 DS 2  
 SWH 12019.230 Hz  
 FIDRES 0.183399 Hz  
 AQ 2.7262976 sec  
 RG 186.92  
 DW 41.600 usec  
 DE 6.50 usec  
 TE 300.0 K  
 D1 1.00000000 sec  
 TDO 1

----- CHANNEL f1 -----  
 SFO1 600.1337060 MHz  
 NUC1 1H  
 P1 10.00 usec  
 PLW1 26.60000038 W

F2 - Processing parameters  
 SI 65536  
 SF 600.1300146 MHz  
 WDW EM  
 SSB 0  
 LB 0.30 Hz  
 GB 0  
 PC 1.00

5a  
 1H NMR  
 600 MHz  
 CDCl<sub>3</sub>

5a  
<sup>13</sup>C NMR  
 151 MHz  
 CDCl<sub>3</sub>

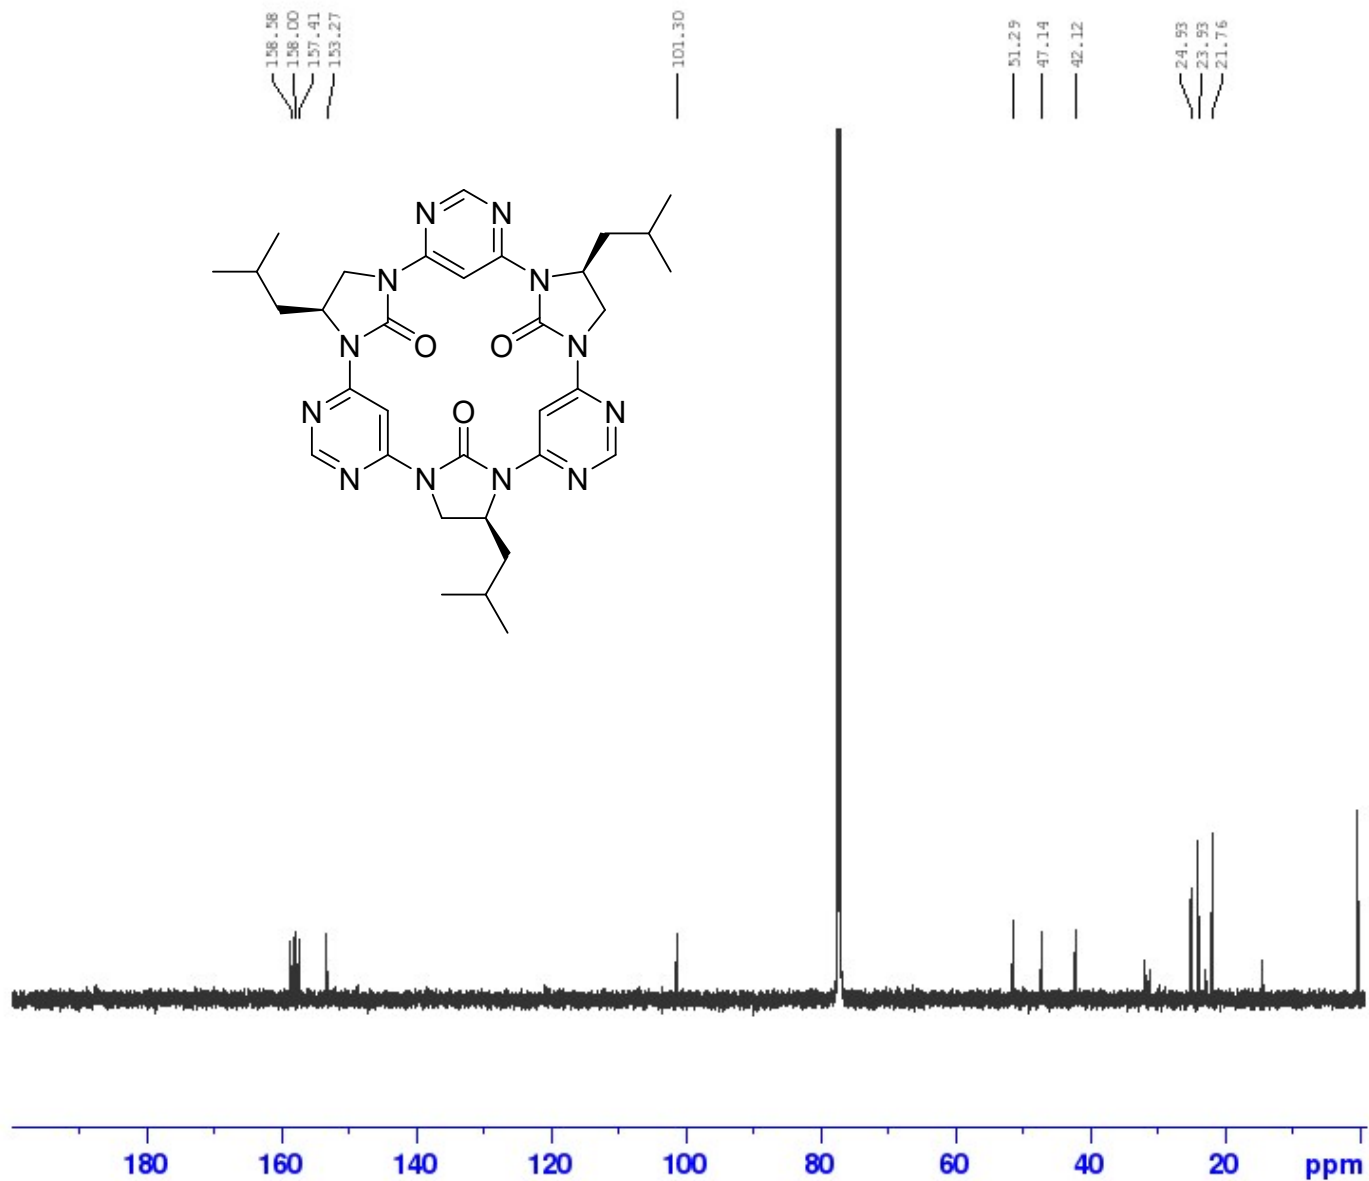

Current Data Parameters  
 NAME TW-B-404 pure Full  
 EXPNO 11  
 PROCNO 1

F2 - Acquisition Parameters  
 Date\_ 20201215  
 Time\_ 8.24  
 INSTRUM spect  
 PROBHD 5 mm PABBO BB/  
 PULPROG zgpg30  
 TD 119044  
 SOLVENT CDCl3  
 NS 8192  
 DS 4  
 SWH 37500.000 Hz  
 FIDRES 0.315010 Hz  
 AQ 1.5872533 sec  
 RG 186.92  
 DW 13.333 use  
 DE 7.73 use  
 TE 300.0 K  
 D1 1.00000000 sec  
 D11 0.03000000 sec  
 TD0 1

===== CHANNEL f1 =====  
 SFO1 150.9194058 MHz  
 NUC1 13c  
 P1 11.80 use  
 PLW1 85.00000000 W

===== CHANNEL f2 =====  
 SFO2 600.1324005 MHz  
 NUC2 1H  
 CPDPRG[2] waltz64  
 PCPD2 80.00 use  
 PLW2 27.00000000 W  
 PLW12 0.43891999 W  
 PLW13 0.28090999 W

F2 - Processing parameters  
 SI 131072  
 SF 150.9027863 MHz  
 WDW EM  
 SSB 0  
 LB 1.00 Hz  
 GB 0  
 PC 1.40

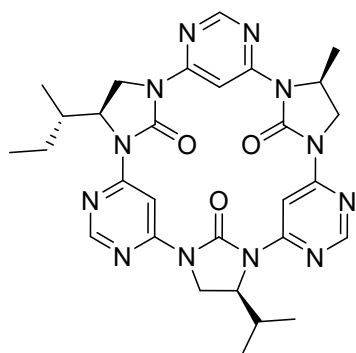

6a

<sup>1</sup>H NMR

400 MHz

CDCl<sub>3</sub>

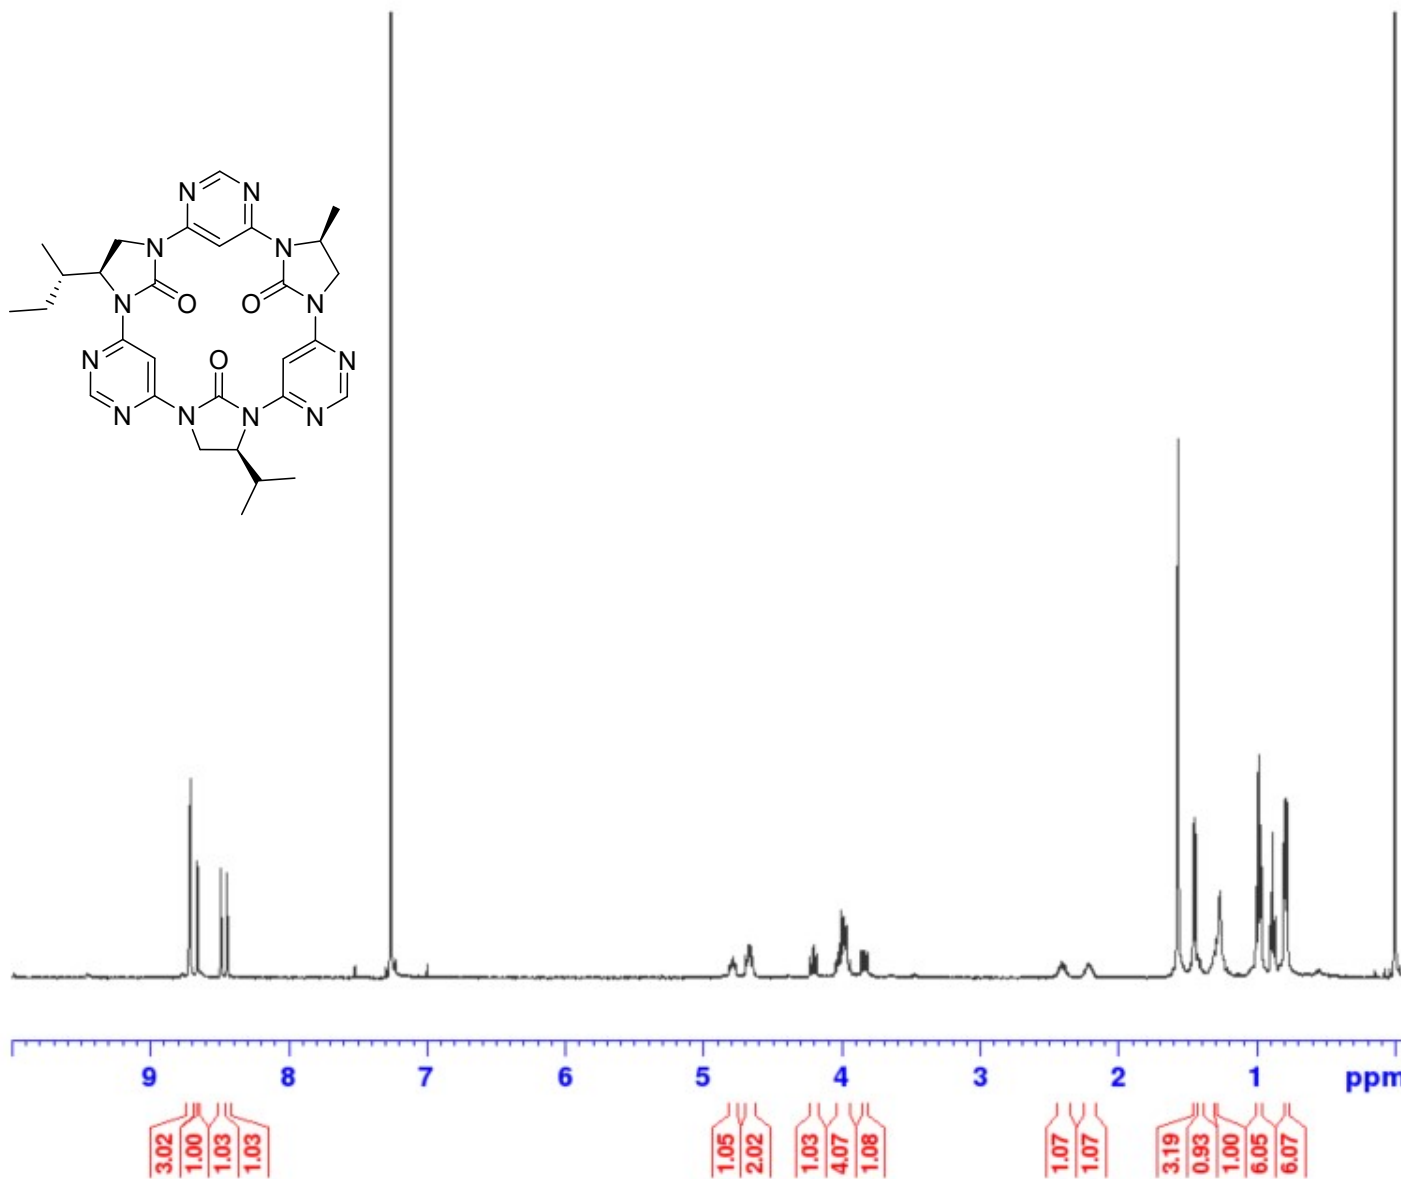

Current Data Parameters  
 NAME TW-C-409-TRIT  
 EXPNO 10  
 PROCNO 1

F2 - Acquisition Parameters  
 Date\_ 20201217  
 Time 14.52 h  
 INSTRUM AVIII\_400  
 PROBHD Z108618\_0146 (  
 PULPROG zg30  
 TD 65536  
 SOLVENT CDCl3  
 NS 16  
 DS 2  
 SWH 8223.685 Hz  
 FIDRES 0.250967 Hz  
 AQ 3.9845889 sec  
 RG 456  
 DW 60.800 usec  
 DE 17.42 usec  
 TE 300.0 K  
 D1 1.00000000 sec  
 TDO 1  
 SFO1 400.1124708 MHz  
 NUC1 1H  
 PO 5.00 usec  
 P1 15.00 usec  
 PLW1 17.29199982 W

F2 - Processing parameters  
 SI 32768  
 SF 400.1100095 MHz  
 WDW EM  
 SSB 0  
 LB 0.30 Hz  
 GB 0  
 PC 1.00





## 8 Appendix – Coordinates for DFT-Optimized Geometries

### 8.1 Trimer Coordinates (Figure 3B)

#### R=Me, Pseudo-Axial

|   |          |          |          |
|---|----------|----------|----------|
| N | 4.486655 | -0.59285 | -0.55038 |
| C | 3.404083 | -0.71712 | 0.241927 |
| C | 2.767509 | 0.380589 | 0.817981 |
| C | 3.190042 | 1.635894 | 0.364419 |
| N | 4.271136 | 1.789424 | -0.41998 |
| C | 4.873436 | 0.658887 | -0.79518 |
| N | 2.436773 | 2.78761  | 0.619049 |
| C | 1.123257 | 2.682348 | 1.127182 |
| N | 0.305771 | 3.507017 | 0.353718 |
| C | 1.074351 | 4.140241 | -0.74675 |
| C | 2.519316 | 3.979568 | -0.23237 |
| C | -1.0811  | 3.306276 | 0.241582 |
| C | -1.71384 | 2.206601 | 0.81821  |
| C | -3.01195 | 1.944439 | 0.363992 |
| C | -3.00679 | 3.889864 | -0.79723 |
| N | -1.72957 | 4.181046 | -0.55179 |
| N | -3.63313 | 0.716485 | 0.61893  |
| C | -2.8859  | -0.36867 | 1.127712 |
| N | -3.19107 | -1.48894 | 0.35405  |
| C | -4.12239 | -1.13944 | -0.74738 |
| C | -4.70634 | 0.191955 | -0.23292 |
| N | 2.884538 | -2.01857 | 0.353968 |
| C | 3.048946 | -3.00077 | -0.74648 |
| C | 2.186287 | -4.17143 | -0.23289 |
| N | 1.195391 | -3.50384 | 0.618575 |
| C | 1.761192 | -2.31394 | 1.127002 |
| C | -0.17867 | -3.58035 | 0.364038 |
| N | -0.58576 | -4.59254 | -0.4217  |
| C | -1.86582 | -4.54871 | -0.79735 |
| N | -2.7567  | -3.58831 | -0.55183 |
| C | -2.32363 | -2.58953 | 0.241945 |
| C | -1.05497 | -2.5876  | 0.81869  |
| N | -3.68492 | 2.803299 | -0.42156 |
| O | 1.328167 | -1.66796 | 2.05803  |
| O | -2.11046 | -0.31683 | 2.05917  |
| O | 0.780319 | 1.9842   | 2.058099 |
| H | 1.937554 | 0.267078 | 1.49188  |
| H | 5.77273  | 0.773816 | -1.39645 |
| H | 0.785121 | 5.188637 | -0.82647 |
| H | 3.241298 | 3.817124 | -1.03021 |
| H | 2.835678 | 4.836565 | 0.369637 |
| H | -1.2011  | 1.545202 | 1.493116 |
| H | -3.55564 | 4.610757 | -1.39935 |

|   |          |          |          |
|---|----------|----------|----------|
| H | -4.8855  | -1.91415 | -0.82854 |
| H | -5.60682 | 0.037042 | 0.368813 |
| H | -4.92657 | 0.898568 | -1.03066 |
| H | 4.101425 | -3.27502 | -0.82537 |
| H | 2.769624 | -4.87466 | 0.368879 |
| H | 1.684421 | -4.71471 | -1.03113 |
| H | -2.21554 | -5.38437 | -1.39971 |
| H | -0.73874 | -1.81297 | 1.493825 |
| C | 0.866887 | 3.421166 | -2.08077 |
| H | 1.175776 | 2.373465 | -2.00188 |
| H | -0.17759 | 3.462976 | -2.38984 |
| H | 1.475824 | 3.899473 | -2.85348 |
| C | -3.39398 | -0.9587  | -2.08019 |
| H | -2.90746 | -1.88392 | -2.38921 |
| H | -4.11153 | -0.67    | -2.8538  |
| H | -2.64122 | -0.16741 | -1.99954 |
| C | 2.531426 | -2.4612  | -2.0809  |
| H | 1.469806 | -2.20392 | -2.00292 |
| H | 3.090865 | -1.57805 | -2.38955 |
| H | 2.641185 | -3.22786 | -2.85346 |

#### R=Me, Pseudo-Equatorial

|   |          |          |          |
|---|----------|----------|----------|
| N | -0.20656 | -4.5456  | -0.73496 |
| C | -0.42198 | -3.50851 | 0.095925 |
| C | 0.619429 | -2.75128 | 0.63898  |
| C | 1.885489 | -2.99503 | 0.101315 |
| N | 2.130956 | -4.0265  | -0.72936 |
| C | 1.068298 | -4.76024 | -1.0615  |
| N | 2.955753 | -2.11171 | 0.298052 |
| C | 2.77548  | -0.86896 | 0.917695 |
| N | 3.619973 | 0.052035 | 0.286534 |
| C | 4.549871 | -0.61274 | -0.62916 |
| C | 4.106636 | -2.10238 | -0.62377 |
| C | 3.249669 | 1.388843 | 0.096257 |
| C | 2.072979 | 1.911887 | 0.639062 |
| C | 1.651064 | 3.130234 | 0.101422 |
| C | 3.588592 | 3.305426 | -1.06098 |
| N | 4.040228 | 2.094104 | -0.73439 |
| N | 0.350915 | 3.615428 | 0.29796  |
| C | -0.63527 | 2.838048 | 0.917584 |
| N | -1.85502 | 3.108862 | 0.286219 |
| C | -1.74411 | 4.24633  | -0.62975 |
| C | -0.23246 | 4.607443 | -0.62395 |
| N | -1.76484 | -3.16079 | 0.286283 |
| C | -2.80565 | -3.6338  | -0.62918 |
| C | -3.87407 | -2.5051  | -0.62367 |
| N | -3.30671 | -1.50384 | 0.298269 |
| C | -2.14027 | -1.96916 | 0.917783 |

|                            |          |          |          |   |          |          |          |
|----------------------------|----------|----------|----------|---|----------|----------|----------|
| C                          | -3.53658 | -0.13528 | 0.101572 | C | -3.34976 | 0.990755 | -0.68219 |
| N                          | -4.5527  | 0.167825 | -0.72899 | C | -2.2529  | 1.645207 | -1.23919 |
| C                          | -4.65691 | 1.454967 | -1.06113 | C | -2.04456 | 2.959473 | -0.80529 |
| N                          | -3.83362 | 2.451752 | -0.7347  | C | -4.0301  | 2.921044 | 0.287151 |
| C                          | -2.82766 | 2.119812 | 0.096069 | N | -4.27468 | 1.631389 | 0.059375 |
| C                          | -2.69246 | 0.839344 | 0.639142 | N | -0.82146 | 3.605215 | -1.01088 |
| N                          | 2.421697 | 3.858677 | -0.72905 | C | 0.283715 | 2.900144 | -1.52806 |
| O                          | -1.54376 | -1.42226 | 1.822178 | N | 1.393451 | 3.225246 | -0.75026 |
| O                          | -0.45985 | 2.048087 | 1.822047 | C | 1.030396 | 4.128451 | 0.368511 |
| O                          | 2.003454 | -0.62588 | 1.821999 | C | -0.3432  | 4.654114 | -0.10394 |
| H                          | 0.44113  | -1.9584  | 1.342231 | N | 2.097019 | -2.8187  | -0.75066 |
| H                          | 1.261341 | -5.62181 | -1.69713 | C | 3.061776 | -2.9567  | 0.367096 |
| H                          | 5.578129 | -0.50072 | -0.27432 | C | 4.203375 | -2.02954 | -0.10585 |
| H                          | 4.486941 | -0.15733 | -1.6184  | N | 3.533298 | -1.09036 | -1.01163 |
| H                          | 3.751291 | -2.40421 | -1.61183 | C | 2.369729 | -1.6947  | -1.52821 |
| H                          | 1.475468 | 1.36081  | 1.342147 | C | 3.585498 | 0.291643 | -0.80531 |
| H                          | 4.238286 | 3.903518 | -1.69642 | N | 4.610602 | 0.742723 | -0.06123 |
| H                          | -2.10666 | 3.963774 | -1.61903 | C | 4.545152 | 2.030001 | 0.287657 |
| H                          | -2.35549 | 5.080841 | -0.27539 | N | 3.550405 | 2.88661  | 0.060575 |
| H                          | 0.206886 | 4.450732 | -1.61191 | C | 2.533126 | 2.406194 | -0.68115 |
| H                          | -2.37997 | -3.80711 | -1.61847 | C | 2.551346 | 1.129341 | -1.23866 |
| H                          | -3.2227  | -4.58027 | -0.27414 | N | -2.9478  | 3.621394 | -0.06099 |
| H                          | -3.95778 | -2.04637 | -1.6117  | O | 1.722941 | -1.28856 | -2.47177 |
| H                          | -5.49969 | 1.718528 | -1.69664 | O | 0.255491 | 2.137816 | -2.47234 |
| H                          | -1.91658 | 0.597481 | 1.342366 | O | -1.97606 | -0.84709 | -2.47198 |
| C                          | 0.046961 | 6.035077 | -0.16996 | H | -0.20711 | -1.91314 | -1.87704 |
| H                          | 1.122265 | 6.221138 | -0.16936 | H | -0.60316 | -5.87737 | 0.849936 |
| H                          | -0.43275 | 6.746335 | -0.85046 | H | -5.15849 | -0.94277 | 0.414411 |
| H                          | -0.34527 | 6.200591 | 0.838321 | H | -3.62521 | -3.31244 | 0.701948 |
| C                          | 5.203233 | -3.0583  | -0.16992 | H | -4.72281 | -3.01259 | -0.65473 |
| H                          | 4.826699 | -4.08257 | -0.16947 | H | -1.55278 | 1.137606 | -1.87795 |
| H                          | 6.05908  | -2.9984  | -0.85038 | H | -4.78856 | 3.461607 | 0.8492   |
| H                          | 5.542657 | -2.80154 | 0.838419 | H | 1.762393 | 4.936237 | 0.420829 |
| C                          | -5.25023 | -2.97677 | -0.16985 | H | -0.2464  | 5.59682  | -0.64979 |
| H                          | -5.94895 | -2.13851 | -0.16952 | H | -1.05647 | 4.794272 | 0.704818 |
| H                          | -5.62628 | -3.74797 | -0.85024 | H | 3.395497 | -3.99453 | 0.418248 |
| H                          | -5.19762 | -3.39899 | 0.838538 | H | 4.970793 | -2.58441 | -0.65286 |
| <b>R=iPr, Pseudo-Axial</b> |          |          |          | H | 4.682322 | -1.48246 | 0.702722 |
| N                          | 0.725283 | -4.5173  | 0.060649 | H | 5.392665 | 2.416398 | 0.849613 |
| C                          | 0.817889 | -3.39611 | -0.68108 | H | 1.76152  | 0.777045 | -1.87733 |
| C                          | -0.29699 | -2.77332 | -1.23843 | C | -3.45168 | -0.84316 | 1.733306 |
| C                          | -1.53956 | -3.25011 | -0.80536 | H | -3.62642 | 0.22422  | 1.893734 |
| N                          | -1.66153 | -4.36339 | -0.06122 | C | 0.993249 | 3.404768 | 1.734735 |
| C                          | -0.51398 | -4.95031 | 0.28781  | H | 2.004577 | 3.021179 | 1.894894 |
| N                          | -2.71019 | -2.5138  | -1.012   | C | 2.455051 | -2.56385 | 1.734309 |
| C                          | -2.65159 | -1.20401 | -1.5287  | H | 1.617666 | -3.24837 | 1.895039 |
| N                          | -3.4893  | -0.40575 | -0.75195 | C | -4.17659 | -1.59916 | 2.852758 |
| C                          | -4.09268 | -1.17234 | 0.365027 | H | -4.02228 | -2.68139 | 2.781759 |
| C                          | -3.85927 | -2.62465 | -0.10717 | H | -3.80189 | -1.28168 | 3.830268 |
|                            |          |          |          | H | -5.25467 | -1.40874 | 2.830514 |

|   |          |          |          |
|---|----------|----------|----------|
| C | -1.93898 | -1.09128 | 1.775328 |
| H | -1.69597 | -2.15582 | 1.699651 |
| H | -1.41556 | -0.56394 | 0.972717 |
| H | -1.52755 | -0.72901 | 2.722167 |
| C | 0.700837 | 4.407445 | 2.856946 |
| H | 0.786918 | 3.921117 | 3.833066 |
| H | 1.405697 | 5.245187 | 2.83801  |
| H | -0.31305 | 4.816228 | 2.786164 |
| C | 0.021334 | 2.219188 | 1.772489 |
| H | -1.02204 | 2.541718 | 1.699426 |
| H | 0.130046 | 1.677495 | 2.716809 |
| H | 0.215095 | 1.505729 | 0.966471 |
| C | 1.913805 | -1.12964 | 1.773547 |
| H | 2.714438 | -0.38719 | 1.698004 |
| H | 1.196684 | -0.94113 | 0.96956  |
| H | 1.392994 | -0.95304 | 2.719358 |
| C | 3.470978 | -2.81215 | 2.855186 |
| H | 3.00794  | -2.64383 | 3.831914 |
| H | 3.844131 | -3.84141 | 2.835555 |
| H | 4.331765 | -2.13836 | 2.783507 |

**R=iPr, Pseudo-Equatorial**

|   |          |          |          |
|---|----------|----------|----------|
| N | -0.88425 | -4.4648  | -0.78082 |
| C | -0.94165 | -3.40449 | 0.046981 |
| C | 0.200225 | -2.81239 | 0.590895 |
| C | 1.416643 | -3.24882 | 0.058981 |
| N | 1.505883 | -4.31475 | -0.75946 |
| C | 0.34428  | -4.87741 | -1.0951  |
| N | 2.601622 | -2.53075 | 0.251046 |
| C | 2.613752 | -1.27334 | 0.866481 |
| N | 3.581873 | -0.49404 | 0.223985 |
| C | 4.339954 | -1.27881 | -0.75636 |
| C | 3.770573 | -2.71679 | -0.62309 |
| C | 3.419332 | 0.886689 | 0.045592 |
| C | 2.336471 | 1.579674 | 0.591063 |
| C | 2.105394 | 2.851152 | 0.059007 |
| C | 4.0507   | 2.736745 | -1.09727 |
| N | 4.307862 | 1.466461 | -0.78338 |
| N | 0.891095 | 3.518203 | 0.251975 |
| C | -0.20373 | 2.899521 | 0.867294 |
| N | -1.36291 | 3.348618 | 0.225362 |
| C | -1.06271 | 4.398441 | -0.75408 |
| C | 0.467417 | 4.623955 | -0.62149 |
| N | -2.2186  | -2.85491 | 0.225889 |
| C | -3.27821 | -3.12017 | -0.75307 |
| C | -4.23793 | -1.90714 | -0.6215  |
| N | -3.49251 | -0.98768 | 0.252652 |
| C | -2.40924 | -1.62651 | 0.867839 |
| C | -3.52188 | 0.397525 | 0.059944 |
| N | -4.48923 | 0.852673 | -0.75927 |

|   |          |          |          |
|---|----------|----------|----------|
| C | -4.39554 | 2.139747 | -1.09576 |
| N | -3.42393 | 2.997472 | -0.78185 |
| C | -2.47742 | 2.517603 | 0.046807 |
| C | -2.53613 | 1.233203 | 0.591981 |
| N | 2.982971 | 3.46136  | -0.76047 |
| O | -1.74057 | -1.18351 | 1.778994 |
| O | -0.15434 | 2.099044 | 1.778525 |
| O | 1.896463 | -0.91589 | 1.778237 |
| H | 0.142763 | -1.9967  | 1.28847  |
| H | 0.405943 | -5.76342 | -1.72345 |
| H | 5.40765  | -1.23286 | -0.537   |
| H | 4.191273 | -0.8647  | -1.75579 |
| H | 3.418993 | -3.08102 | -1.59028 |
| H | 1.659744 | 1.122229 | 1.289671 |
| H | 4.786525 | 3.233172 | -1.72637 |
| H | -1.34766 | 4.063715 | -1.75368 |
| H | -1.63602 | 5.300021 | -0.53335 |
| H | 0.95811  | 4.50191  | -1.58898 |
| H | -2.84612 | -3.20088 | -1.75267 |
| H | -3.77286 | -4.06695 | -0.53131 |
| H | -4.37628 | -1.42111 | -1.58917 |
| H | -5.19347 | 2.528981 | -1.72461 |
| H | -1.80141 | 0.875602 | 1.290238 |
| C | 0.879325 | 5.991677 | -0.04398 |
| H | 1.971372 | 5.947403 | 0.04067  |
| C | 4.749596 | -3.7571  | -0.04587 |
| H | 4.16529  | -4.68066 | 0.039566 |
| C | -5.62918 | -2.23355 | -0.04555 |
| H | -6.13671 | -1.26551 | 0.03802  |
| C | -5.55825 | -2.86421 | 1.348583 |
| H | -6.56553 | -3.02832 | 1.742556 |
| H | -5.05345 | -3.83673 | 1.330734 |
| H | -5.02599 | -2.21856 | 2.052409 |
| C | -6.42198 | -3.10255 | -1.02818 |
| H | -5.96686 | -4.09164 | -1.15383 |
| H | -7.44195 | -3.25879 | -0.66527 |
| H | -6.48542 | -2.63273 | -2.01544 |
| C | 0.523966 | 7.113547 | -1.02599 |
| H | -0.56004 | 7.213562 | -1.15306 |
| H | 0.897708 | 8.074789 | -0.66162 |
| H | 0.964015 | 6.934725 | -2.01281 |
| C | 0.296251 | 6.244255 | 1.349783 |
| H | -0.7984  | 6.292773 | 1.331017 |
| H | 0.656893 | 7.198547 | 1.744783 |
| C | 5.898104 | -4.01064 | -1.02866 |
| H | 6.526594 | -3.1219  | -1.1565  |
| H | 6.544011 | -4.81479 | -0.66453 |
| H | 5.522462 | -4.30266 | -2.0151  |
| C | 5.260925 | -3.37796 | 1.347385 |
| H | 5.851625 | -2.45512 | 1.327665 |

|   |          |          |          |
|---|----------|----------|----------|
| H | 4.435948 | -3.23777 | 2.051151 |
| H | 5.906066 | -4.16804 | 1.742755 |
| H | 0.589067 | 5.460172 | 2.053342 |

|   |          |          |          |
|---|----------|----------|----------|
| H | -3.26308 | -3.58148 | 0.333639 |
| H | 1.204856 | 5.157662 | 1.104566 |
| H | -0.8404  | 5.717162 | -0.01358 |
| H | -1.58005 | 4.726019 | 1.262739 |
| H | -5.17357 | 2.952856 | 1.153352 |
| H | -1.66389 | 1.326399 | -1.72677 |
| C | 3.022493 | -2.27499 | 1.617885 |
| H | 2.222102 | -3.01111 | 1.728475 |
| C | -3.70234 | -1.30859 | 1.618785 |
| H | -4.01838 | -0.292   | 1.867084 |
| C | 0.503579 | 3.388438 | 2.144778 |
| H | -0.15322 | 2.532964 | 1.956918 |
| H | 1.496866 | 3.021454 | 2.404401 |
| H | 0.106594 | 3.945582 | 2.998494 |
| C | 4.131528 | -2.64628 | 2.609101 |
| H | 4.976523 | -1.95073 | 2.55402  |
| H | 3.752047 | -2.61514 | 3.634669 |
| H | 4.511535 | -3.65617 | 2.423281 |
| C | 2.4498   | -0.8851  | 1.914614 |
| H | 3.228649 | -0.11671 | 1.928418 |
| H | 1.696694 | -0.58935 | 1.179544 |
| H | 1.970218 | -0.88127 | 2.898249 |
| C | -4.57157 | -2.27134 | 2.442632 |
| H | -4.4655  | -2.05919 | 3.510198 |
| H | -5.6315  | -2.17324 | 2.186609 |
| H | -4.28364 | -3.31742 | 2.289203 |
| C | -2.21896 | -1.45671 | 2.00969  |
| H | -1.82158 | -2.41728 | 1.659051 |
| H | -2.19145 | -1.51606 | 3.104558 |
| C | -1.29006 | -0.31478 | 1.581007 |
| H | -1.05271 | -0.32791 | 0.515164 |
| H | -1.73827 | 0.658351 | 1.807351 |
| H | -0.34287 | -0.37693 | 2.121368 |

**R=ABC, Pseudo-Axial**

|   |          |          |          |
|---|----------|----------|----------|
| N | 3.201946 | 3.395137 | 0.580853 |
| C | 2.277033 | 2.894786 | -0.26217 |
| C | 2.47673  | 1.716228 | -0.97817 |
| C | 3.604435 | 0.968343 | -0.61833 |
| N | 4.549392 | 1.449555 | 0.208033 |
| C | 4.300689 | 2.65563  | 0.725197 |
| N | 3.73755  | -0.37031 | -1.00609 |
| C | 2.626004 | -1.05104 | -1.54922 |
| N | 2.485564 | -2.25153 | -0.85595 |
| C | 3.541317 | -2.42399 | 0.170627 |
| C | 4.549692 | -1.32498 | -0.24363 |
| C | 1.277297 | -2.96631 | -0.81871 |
| C | 0.100779 | -2.43669 | -1.34611 |
| C | -1.08288 | -3.08955 | -0.98329 |
| C | 0.122068 | -4.72384 | 0.022871 |
| N | 1.306427 | -4.13902 | -0.15536 |
| N | -2.33006 | -2.49771 | -1.20237 |
| C | -2.42585 | -1.1499  | -1.59694 |
| N | -3.40901 | -0.5473  | -0.81373 |
| C | -4.03618 | -1.5142  | 0.121934 |
| C | -3.52529 | -2.86394 | -0.44021 |
| N | 1.048499 | 3.577167 | -0.28361 |
| C | 0.55965  | 4.29889  | 0.916852 |
| C | -0.84855 | 4.729193 | 0.456711 |
| N | -1.19569 | 3.710886 | -0.53989 |
| C | -0.01266 | 3.192285 | -1.10377 |
| C | -2.35307 | 2.930403 | -0.44417 |
| N | -3.33128 | 3.402171 | 0.349134 |
| C | -4.34721 | 2.562637 | 0.563267 |
| N | -4.45222 | 1.291527 | 0.174441 |
| C | -3.44721 | 0.83991  | -0.60028 |
| C | -2.42402 | 1.673049 | -1.05147 |
| N | -1.08278 | -4.25688 | -0.31513 |
| O | 0.055988 | 2.523909 | -2.11465 |
| O | -1.7494  | -0.61679 | -2.45226 |
| O | 1.91837  | -0.63975 | -2.44468 |
| H | 1.752987 | 1.354486 | -1.68591 |
| H | 5.077274 | 3.069805 | 1.364583 |
| H | 3.977727 | -3.41823 | 0.05668  |
| H | 5.012925 | -0.82204 | 0.601902 |
| H | 5.338176 | -1.72606 | -0.88644 |
| H | 0.096058 | -1.53329 | -1.92791 |
| H | 0.135372 | -5.68784 | 0.52674  |
| H | -5.1196  | -1.43755 | 0.010063 |
| H | -4.25862 | -3.32598 | -1.10727 |

**R=ABC, Pseudo-Equatorial**

|   |          |          |          |
|---|----------|----------|----------|
| N | 4.497552 | 1.769752 | -0.69241 |
| C | 3.586777 | 1.20144  | 0.119871 |
| C | 2.513658 | 1.913652 | 0.661891 |
| C | 2.314683 | 3.193537 | 0.137097 |
| N | 3.211552 | 3.788562 | -0.6724  |
| C | 4.269465 | 3.046445 | -1.00109 |
| N | 1.11314  | 3.892942 | 0.321177 |
| C | -0.00707 | 3.278052 | 0.895831 |
| N | -1.14621 | 3.764579 | 0.244141 |
| C | -0.82392 | 4.903835 | -0.61661 |
| C | 0.728332 | 4.977985 | -0.6018  |
| C | -2.26275 | 2.956756 | -0.00287 |
| C | -2.34834 | 1.652099 | 0.488183 |
| C | -3.33147 | 0.850438 | -0.09743 |
| C | -4.15471 | 2.644845 | -1.20809 |

|   |          |          |          |   |          |          |          |
|---|----------|----------|----------|---|----------|----------|----------|
| N | -3.18482 | 3.480006 | -0.833   | H | 6.646438 | -4.53493 | -0.54424 |
| N | -3.32584 | -0.53845 | 0.049922 | H | 5.679288 | -3.99989 | -1.9256  |
| C | -2.29483 | -1.2169  | 0.703726 | C | -6.24286 | -2.56917 | -1.3826  |
| N | -2.11322 | -2.4432  | 0.054874 | H | -5.82838 | -3.58088 | -1.4588  |
| C | -3.1442  | -2.66417 | -0.96549 | H | -7.29732 | -2.67052 | -1.11113 |
| C | -4.07569 | -1.42635 | -0.84937 | H | -6.195   | -2.11108 | -2.37627 |
| N | 3.71787  | -0.18434 | 0.283072 | C | -5.55478 | -2.38426 | 1.057185 |
| C | 4.492293 | -0.96831 | -0.68546 | H | -4.80957 | -3.18845 | 1.124017 |
| C | 3.901617 | -2.39963 | -0.58363 | H | -6.52712 | -2.88395 | 1.144838 |
| N | 2.705055 | -2.2051  | 0.250196 | C | -5.39985 | -1.43045 | 2.248707 |
| C | 2.715074 | -0.95544 | 0.881481 | H | -4.40042 | -0.99907 | 2.32244  |
| C | 1.516367 | -2.90107 | 0.006215 | H | -6.11292 | -0.60218 | 2.174657 |
| N | 1.615931 | -3.95396 | -0.82792 | H | -5.6     | -1.9578  | 3.186701 |
| C | 0.457393 | -4.49033 | -1.2134  |   |          |          |          |
| N | -0.77432 | -4.06093 | -0.93526 |   |          |          |          |
| C | -0.84189 | -3.01531 | -0.09021 |   |          |          |          |
| C | 0.290121 | -2.45469 | 0.505435 |   |          |          |          |
| N | -4.27135 | 1.346872 | -0.92504 |   |          |          |          |
| O | 1.971376 | -0.597   | 1.771383 |   |          |          |          |
| O | -1.6622  | -0.80896 | 1.656998 |   |          |          |          |
| O | 0.00839  | 2.448712 | 1.781656 |   |          |          |          |
| H | 1.819847 | 1.463526 | 1.348155 |   |          |          |          |
| H | 5.021882 | 3.532314 | -1.61866 |   |          |          |          |
| H | -1.27005 | 5.81927  | -0.2173  |   |          |          |          |
| H | -1.22978 | 4.742636 | -1.61588 |   |          |          |          |
| H | 1.136261 | 4.742974 | -1.58809 |   |          |          |          |
| H | -1.63647 | 1.258754 | 1.190871 |   |          |          |          |
| H | -4.93084 | 3.067385 | -1.8427  |   |          |          |          |
| H | -2.67921 | -2.7424  | -1.95038 |   |          |          |          |
| H | -3.67231 | -3.59948 | -0.77473 |   |          |          |          |
| H | -4.16802 | -0.92806 | -1.81652 |   |          |          |          |
| H | 4.375511 | -0.54158 | -1.6838  |   |          |          |          |
| H | 5.554163 | -0.93788 | -0.43717 |   |          |          |          |
| H | 3.5798   | -2.75219 | -1.56529 |   |          |          |          |
| H | 0.525808 | -5.3665  | -1.85469 |   |          |          |          |
| H | 0.222609 | -1.65184 | 1.216922 |   |          |          |          |
| C | -5.49901 | -1.72571 | -0.33756 |   |          |          |          |
| H | -5.99603 | -0.75009 | -0.27777 |   |          |          |          |
| C | 1.262653 | 6.329914 | -0.14551 |   |          |          |          |
| H | 2.353688 | 6.317721 | -0.1442  |   |          |          |          |
| H | 0.920123 | 7.117259 | -0.82518 |   |          |          |          |
| H | 0.905719 | 6.562128 | 0.862686 |   |          |          |          |
| C | 4.8463   | -3.45664 | 0.01974  |   |          |          |          |
| H | 4.247149 | -4.3728  | 0.078992 |   |          |          |          |
| C | 5.314853 | -3.09325 | 1.432139 |   |          |          |          |
| H | 5.936452 | -3.89398 | 1.843492 |   |          |          |          |
| H | 5.917257 | -2.17782 | 1.438616 |   |          |          |          |
| H | 4.468504 | -2.94734 | 2.108839 |   |          |          |          |
| C | 6.024447 | -3.7196  | -0.92474 |   |          |          |          |
| H | 6.66895  | -2.83877 | -1.02449 |   |          |          |          |

## 8.2 Tetramer Coordinates (Figure 3A)

R=iPr

|   |          |          |          |
|---|----------|----------|----------|
| N | -0.68871 | -4.64602 | -0.28316 |
| C | -0.19785 | -5.95903 | -0.70194 |
| C | 1.315576 | -5.8954  | -0.39875 |
| N | 1.542436 | -4.44976 | -0.24308 |
| C | 0.351866 | -3.74501 | -0.05894 |
| O | 0.240966 | -2.57172 | 0.239254 |
| C | 2.805376 | -3.86679 | -0.32665 |
| N | 3.811341 | -4.71281 | -0.62931 |
| C | 5.010766 | -4.15073 | -0.77363 |
| N | 5.328789 | -2.86042 | -0.67192 |
| C | 4.308099 | -2.03805 | -0.358   |
| C | 3.005411 | -2.49592 | -0.1452  |
| C | 1.75182  | -6.68272 | 0.855382 |
| C | 1.61723  | -8.18952 | 0.609659 |
| C | 1.008412 | -6.24256 | 2.120812 |
| N | 4.646241 | -0.68891 | -0.28341 |
| C | 5.959419 | -0.19795 | -0.70151 |
| C | 5.895502 | 1.315496 | -0.39844 |
| N | 4.449748 | 1.542206 | -0.24336 |
| C | 3.745017 | 0.351588 | -0.05964 |
| O | 2.571534 | 0.240549 | 0.237763 |
| C | 3.866785 | 2.805171 | -0.32674 |
| N | 4.712853 | 3.811122 | -0.62932 |
| C | 4.150864 | 5.010598 | -0.77352 |
| N | 2.86058  | 5.328708 | -0.67173 |
| C | 2.038168 | 4.308056 | -0.35781 |
| C | 2.49593  | 3.005297 | -0.14518 |
| C | 6.682285 | 1.751924 | 0.855937 |
| C | 8.18923  | 1.617919 | 0.610693 |
| C | 6.241987 | 1.008245 | 2.121168 |
| N | 0.689048 | 4.646214 | -0.28315 |







|   |          |          |          |
|---|----------|----------|----------|
| N | -4.64403 | -0.88444 | -0.02705 |
| C | -6.03437 | -0.44864 | -0.2368  |
| C | -5.86446 | 1.059495 | -0.52487 |
| C | -4.24562 | -2.21713 | -0.10428 |
| C | -2.91914 | -2.60791 | 0.091799 |
| C | -2.64704 | -3.9612  | -0.11887 |
| N | -3.60257 | -4.86016 | -0.42462 |
| C | -4.8344  | -4.36337 | -0.5416  |
| N | -5.22181 | -3.09458 | -0.41359 |
| O | -0.13234 | -2.49793 | -0.04126 |
| O | -2.63441 | 0.12901  | 0.597213 |
| O | 0.134898 | 2.552761 | 0.503669 |
| O | 2.636824 | -0.15334 | 0.613063 |
| H | 5.612216 | 5.063894 | -0.7577  |
| H | 2.144541 | 1.892555 | 0.39815  |
| H | -0.974   | 6.446642 | -0.95787 |
| H | 1.668821 | 6.564512 | 0.141195 |
| H | 1.293905 | 5.961396 | -1.4764  |
| H | 6.428202 | 0.981817 | -1.0912  |
| H | 6.609122 | -1.67499 | -0.03082 |
| H | 5.920797 | -1.28164 | -1.61014 |
| H | -1.92963 | 2.110875 | 0.389818 |
| H | -5.05441 | 5.622385 | -0.7588  |
| H | 5.045898 | -5.62726 | -0.83893 |
| H | 1.934325 | -2.12539 | 0.364066 |
| H | 0.950111 | -6.56107 | -0.72967 |
| H | -1.33606 | -6.18317 | -1.23502 |
| H | -1.66098 | -6.5196  | 0.468105 |
| H | -6.43945 | -0.97572 | -1.10166 |
| H | -5.92407 | 1.292751 | -1.59285 |
| H | -6.60775 | 1.666003 | -0.0066  |
| H | -2.14926 | -1.9025  | 0.344932 |
| H | -5.61848 | -5.08017 | -0.77722 |
| C | -6.89834 | -0.72933 | 0.991209 |
| H | -7.92186 | -0.38289 | 0.816302 |
| H | -6.92255 | -1.80095 | 1.195289 |
| H | -6.50026 | -0.20619 | 1.866554 |
| C | -0.7261  | 6.80407  | 1.154217 |
| H | -0.38183 | 7.835525 | 1.028895 |
| H | -1.79762 | 6.817237 | 1.360467 |
| H | -0.20185 | 6.364803 | 2.008901 |
| C | 6.904174 | 0.707487 | 0.994038 |
| H | 7.927013 | 0.365649 | 0.806531 |
| H | 6.927788 | 1.77634  | 1.21224  |
| H | 6.514017 | 0.171936 | 1.865428 |
| C | 0.771558 | -6.63015 | 1.417682 |
| H | 0.434237 | -7.67102 | 1.444158 |
| H | 1.849385 | -6.6118  | 1.590618 |
| H | 0.271699 | -6.08116 | 2.221862 |

**R=H, flat**

|   |          |          |          |
|---|----------|----------|----------|
| C | -4.22109 | -5.02914 | -0.04444 |
| N | -4.7658  | -3.81101 | -0.03775 |
| C | -3.88773 | -2.7894  | -0.00791 |
| C | -2.50574 | -2.98291 | 0.018494 |
| C | -2.07385 | -4.31007 | 0.002975 |
| N | -2.92664 | -5.35286 | -0.02818 |
| N | -0.72072 | -4.64429 | 0.017667 |
| C | 0.325337 | -3.72244 | 0.02417  |
| N | 1.515057 | -4.44946 | 0.012706 |
| C | 1.291613 | -5.89508 | 0.019647 |
| C | -0.25066 | -6.02901 | -0.0229  |
| N | -4.45196 | -1.51499 | -0.00594 |
| C | -5.89749 | -1.29193 | -0.0321  |
| C | -6.03247 | 0.250471 | 0.005493 |
| N | -4.64725 | 0.720606 | -0.00942 |
| C | -3.72515 | -0.32513 | -0.00135 |
| C | -4.31255 | 2.073595 | 0.000921 |
| C | 2.789837 | -3.886   | 0.010874 |
| C | 2.984569 | -2.50402 | -0.00514 |
| C | 4.312277 | -2.07365 | -0.00161 |
| N | 5.354538 | -2.92754 | 0.012749 |
| C | 5.029594 | -4.22174 | 0.023038 |
| N | 3.810862 | -4.76517 | 0.023564 |
| N | -5.35468 | 2.927709 | 0.009805 |
| C | -5.02946 | 4.221856 | 0.017488 |
| N | -3.8106  | 4.765017 | 0.019458 |
| C | -2.7897  | 3.885642 | 0.011909 |
| C | -2.98474 | 2.503652 | 0.000193 |
| N | 4.646923 | -0.72065 | -0.01358 |
| N | -1.51491 | 4.449121 | 0.014389 |
| C | -1.29186 | 5.894835 | 0.014885 |
| C | 0.25066  | 6.029295 | -0.01841 |
| N | 0.720838 | 4.644477 | 0.016364 |
| C | -0.32499 | 3.72242  | 0.024607 |
| C | 3.724854 | 0.325137 | -0.01093 |
| N | 4.451736 | 1.514956 | -0.0099  |
| C | 5.897351 | 1.291851 | -0.02923 |
| C | 6.032058 | -0.25055 | 0.008894 |
| C | 3.887631 | 2.789424 | -0.01032 |
| C | 2.505626 | 2.98305  | 0.01366  |
| C | 2.073975 | 4.310324 | 0.002172 |
| N | 2.926927 | 5.353111 | -0.02435 |
| C | 4.221361 | 5.029244 | -0.0394  |
| N | 4.765885 | 3.811018 | -0.03518 |
| O | -0.21935 | 2.511816 | 0.038907 |
| O | 2.514151 | 0.219626 | -0.01084 |
| O | 0.220314 | -2.51178 | 0.038112 |
| O | -2.51449 | -0.2195  | 0.006798 |
| H | -4.91997 | -5.86284 | -0.06754 |

|   |          |          |          |
|---|----------|----------|----------|
| H | -1.81663 | -2.16021 | 0.042282 |
| H | 1.776135 | -6.35738 | -0.84288 |
| H | 1.724886 | -6.34024 | 0.918571 |
| H | -0.64575 | -6.58851 | 0.827568 |
| H | -0.603   | -6.52077 | -0.93287 |
| H | -6.33079 | -1.72729 | -0.93573 |
| H | -6.37092 | -1.77476 | 0.825389 |
| H | -6.54178 | 0.60409  | 0.905203 |
| H | -6.57547 | 0.644227 | -0.85626 |
| H | 2.162532 | -1.81373 | -0.01501 |
| H | 5.862728 | -4.92161 | 0.033158 |
| H | -5.86245 | 4.921936 | 0.02356  |
| H | -2.1629  | 1.813103 | -0.00548 |
| H | -1.73117 | 6.344905 | 0.908311 |
| H | -1.77093 | 6.352112 | -0.85345 |
| H | 0.607921 | 6.526778 | -0.92323 |
| H | 0.640942 | 6.583566 | 0.837791 |
| H | 6.366677 | 1.774612 | 0.830541 |
| H | 6.334996 | 1.727222 | -0.93077 |
| H | 6.579772 | -0.64417 | -0.84993 |
| H | 6.536413 | -0.60434 | 0.911327 |
| H | 1.81631  | 2.160403 | 0.033667 |
| H | 4.920399 | 5.862906 | -0.05883 |
